# Supplementary material for: On the stereochemistry of acetylide additions to highly functionalized biphenylcarbaldehydes and multi-component cyclization of 1,n-diynes. Syntheses of dibenzocyclooctadiene lignans
Source: Royal Society of Chemistry journal article supplement (doi:10.1039/c2sc00920j), 2012-01-01

11 August 2011

**On the Stereochemistry of Acetylide Additions to Highly Functionalized  
Biphenylcarboxaldehydes and Multi-component Cyclizations of 1,n-Diynes. Syntheses of  
Dibenzocyclooctadiene Lignans**

Wei Gong, Ramakrishna Reddy Singidi, Judith C. Gallucci, T. V. RajanBabu\*

Department of Chemistry, The Ohio State University, 100 W. 18<sup>th</sup> Av., Columbus, OH 43210

**SUPPORTING INFORMATION**

**Table of Contents**

|                                                                                                                                   |     |
|-----------------------------------------------------------------------------------------------------------------------------------|-----|
| General Methods                                                                                                                   | S3  |
| Synthesis of aldehyde <b>5A</b> from 2-bromo-3-hydroxy-4-dimethoxybenzaldehyde                                                    | S3  |
| Synthesis of compound <b>7A</b>                                                                                                   | S7  |
| Synthesis of compound <b>8A</b>                                                                                                   | S7  |
| Synthesis of <b>9</b> and Synthesis of <b>10</b> (known)                                                                          | S8  |
| Synthesis of biaryls <b>11</b> and <b>12</b>                                                                                      | S8  |
| Hydrolysis of <b>11</b> to <b>13</b> , and lithium trimethylsilylacetylide addition to <b>13</b> . Synthesis of <b>15</b>         | S10 |
| Synthesis of [ <b>13</b> + <b>14</b> ] from <b>12</b> , and Lithium trimethylsilylacetylide addition to [ <b>13</b> + <b>14</b> ] |     |
| Synthesis of [ <b>15</b> + <b>16</b> ]                                                                                            | S11 |
| Hydrolysis of oxazolines [ <b>11</b> + <b>12</b> ]. Synthesis of <b>17</b>                                                        | S12 |
| Synthesis of <b>18</b>                                                                                                            | S12 |
| Synthesis of benzyl bromide <b>19</b>                                                                                             | S13 |
| Synthesis of aldehyde <b>20</b>                                                                                                   | S13 |
| Addition of lithium trimethylsilylacetylide to <b>20</b> . Synthesis of <b>21A</b>                                                | S14 |
| Synthesis of Oxazoline Precursor <b>22A</b> , <b>22B</b> and <b>22C</b>                                                           | S15 |
| Major compound <b>22A</b> ( <i>Sa,S</i> )                                                                                         | S20 |
| Synthesis of compound <b>22B</b> ( <i>Sa,S</i> )                                                                                  | S21 |
| Synthesis of compound <b>22C</b> ( <i>Sa,S</i> )                                                                                  | S21 |
| Synthesis of compound <b>23A</b>                                                                                                  | S22 |
| Synthesis of compound <b>23B</b>                                                                                                  | S22 |
| Synthesis of compound <b>23C</b>                                                                                                  | S23 |
| Synthesis of compound <b>24B</b>                                                                                                  | S23 |
| Synthesis of compound <b>25B</b>                                                                                                  | S24 |
| Synthesis of compound <b>24C</b>                                                                                                  | S24 |
| Synthesis of compound <b>25C</b>                                                                                                  | S24 |
| Synthesis of compound <b>26</b>                                                                                                   | S25 |
| Synthesis of compound <b>27</b>                                                                                                   | S25 |
| Synthesis of compound <b>28</b>                                                                                                   | S26 |

|                                                                                                |     |
|------------------------------------------------------------------------------------------------|-----|
| Synthesis of compounds <b>29</b> and <b>30</b>                                                 | S27 |
| Synthesis of compound <b>31</b>                                                                | S28 |
| Synthesis of compounds <b>32</b> and <b>33</b>                                                 | S29 |
| Synthesis of compound <b>39A</b>                                                               | S30 |
| Synthesis of compound <b>40</b>                                                                | S30 |
| Synthesis of compound <b>41</b>                                                                | S31 |
| Borostannylation of diyne <b>41</b> : Synthesis of compounds <b>42</b> and <b>43</b>           | S31 |
| Synthesis of compound <b>44</b>                                                                | S32 |
| Borostannylation of diyne <b>44</b> : Synthesis of compounds <b>47</b> and <b>48</b>           | S33 |
| Synthesis of compound <b>49</b>                                                                | S34 |
| Synthesis of compound <b>50</b>                                                                | S35 |
| [BSn]-mediated Cyclization of diyne <b>50</b> : Synthesis of compounds <b>51</b> and <b>52</b> | S35 |
| Synthesis of compound <b>55</b>                                                                | S37 |
| Synthesis of compound <b>53</b>                                                                | S37 |
| Attempted [BSn]-mediated cyclization of <b>53</b> . Adduct <b>54</b>                           | S38 |
| <b>References</b>                                                                              | S38 |
| <b><sup>1</sup>H and <sup>13</sup>C NMR Spectra of important compounds</b>                     | S39 |

**General Methods.** All catalyzed reactions were carried out under an inert atmosphere of nitrogen in a Vacuum Atmosphere drybox, or using Schlenk techniques. Methylene chloride ( $\text{CH}_2\text{Cl}_2$ ) was distilled from calcium hydride under nitrogen and stored over 4 Å molecular sieves. Tetrahydrofuran (THF) was distilled from sodium benzophenone ketyl under nitrogen and stored over 4 Å molecular sieves. Hexane was distilled from  $\text{CaH}_2$  and stored over 4 Å molecular sieves. All chemicals were purchased from Aldrich Chemical Company and used as received unless otherwise mentioned. Analytical TLC was done on E. Merck precoated (0.25 mm) silica gel 60 F<sub>254</sub> plates. Flash column chromatography was conducted on silica gel 40 (Scientific Adsorbents Incorporated).  $^1\text{H}$  NMR spectra were recorded on a 500 MHz and or a 400 MHz spectrometer. Coupling constants ( $J$ ) are reported in Hz. Optical rotations were recorded in solution at the sodium D-line using filtered (45  $\mu$  nylon filter) solutions.

**Compounds previously disclosed.** Preparation and spectroscopic details of the following compounds were disclosed in an initial communication<sup>2</sup> describing parts of this work: **1**, **2**, **4**, **8A**. Results of X-ray crystallographic analysis of solid-state structure of **38** was also deposited with that publication.<sup>1</sup> Details of a modified procedure for the synthesis of the [B-Sn]-reagent **3** have been published.<sup>2</sup> Compounds **9**<sup>3</sup> and **10**<sup>4</sup> were prepared by known procedures.

### Synthesis of aldehyde **5A** from 2-bromo-3-hydroxy-4-dimethoxybenzaldehyde

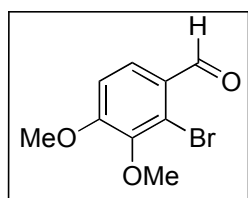

**Synthesis of 2-bromo-3,4-dimethoxybenzaldehyde.** To a stirred solution of commercially available 2-bromo-3-hydroxy-4-methoxybenzaldehyde (2.0 g, 8.6 mmol) in acetone (35 mL) was added  $\text{K}_2\text{CO}_3$  (658 mg, 17 mmol) followed by methyl iodide (2.0 mL) ~~were added~~ at room temperature, and <sup>was further</sup> stirred for 4 h. The mixture was gradually brought to 60 °C temperature and stirred for 4 h. The solvent was evaporated under reduced pressure to afford the crude product, which was diluted with ethyl acetate and washed successively with water, brine and dried over  $\text{Na}_2\text{SO}_4$ . The organic layer was evaporated under reduced pressure to get the crude product which was purified by column chromatography on silica gel using 20 % EtOAc/hexane as the eluent to yield the product (1.95 g, 8.0 mmol, 93%) as a viscous solid.  $^1\text{H}$  NMR (400 MHz,  $\text{CDCl}_3$ )  $\delta$  10.24 (s, 1 H), 7.72 (d,  $J$  = 8.8 Hz, 1 H), 6.94 (d,  $J$  = 8.8 Hz, 1 H), 3.93 (s, 3 H), 3.84 (s, 3 H);  $^{13}\text{C}$  NMR (125 MHz,  $\text{CDCl}_3$ )  $\delta$  191.12, 158.86, 146.63, 127.62, 126.69, 123.30, 111.17, 60.86, 56.51; IR (neat,  $\text{cm}^{-1}$ ): 1682, 1558, 1493, 1259, 1023; MS (ESI):  $m/z$ : 266.95  $[\text{M}+\text{Na}]^+$ .

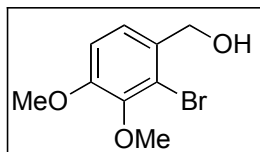

**Synthesis of 2-bromo-3,4-dimethoxybenzyl alcohol.** To a solution of aldehyde from the previous step (1.22 g, 5.0 mmol) in EtOH (20 mL) at 0 °C was added NaBH<sub>4</sub> (370 mg, 10.0 mmol) in portions. After stirring at the same temperature for 1 h, the reaction was quenched by the addition of aq. NH<sub>4</sub>Cl (5.0 mL). The organic solvent was evaporated under reduced pressure to afford the crude product, which was diluted with ethyl acetate and washed successively with water, brine and dried over Na<sub>2</sub>SO<sub>4</sub>. The organic layer was evaporated under reduced pressure to afford the crude product which was purified by column chromatography on silica gel using 30 % EtOAc/hexane the eluent to yield the benzyl alcohol (1.08 g, 4.4 mmol) in 88% yield as a viscous oil. <sup>1</sup>H NMR (400 MHz, CDCl<sub>3</sub>) δ 7.14 (d, *J* = 8.4 Hz, 1 H), 6.84 (d, *J* = 8.4 Hz, 1 H), 4.67 (s, 2 H), 3.86 (s, 3 H), 3.84 (s, 3 H); <sup>13</sup>C NMR (125 MHz, CDCl<sub>3</sub>) δ 153.40, 146.81, 133.07, 124.52, 111.48, 65.39, 60.73, 56.36; IR (neat, cm<sup>-1</sup>): 1490, 1262, 1036, 823; MS (ESI): *m/z*: 268.97 [M+Na]<sup>+</sup>.

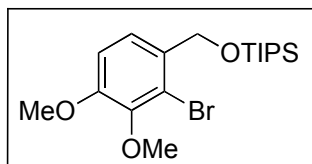

**Synthesis of the TIPS ether of 2-bromo-3,4-dimethoxybenzyl alcohol.** To a stirred solution of the alcohol (1.0 g, 4.0 mmol) in CH<sub>2</sub>Cl<sub>2</sub> (13.0 mL) at 0 °C was added imidazole (457 mg, 6.73 mmol) followed by TIPSCl (1.05 mL, 5.0 mmol) and the reaction mixture was gradually brought to room temperature over 2 h. Afterwards, the reaction mixture was diluted with CH<sub>2</sub>Cl<sub>2</sub> and was washed subsequently with water, brine and dried over Na<sub>2</sub>SO<sub>4</sub>. The solvent was evaporated under reduced pressure to afford the crude product, which was purified by silica gel column chromatography. Elution with 10 % EtOAc/hexane provided product (1.41 g, 3.52 mmol) in 88 % yield as a viscous oil. <sup>1</sup>H NMR (400 MHz, CDCl<sub>3</sub>) δ 7.31 (d, *J* = 8.4 Hz, 1 H), 6.89 (d, *J* = 8.4 Hz, 1 H), 4.74 (s, 2 H), 3.85 (s, 3 H), 3.83 (s, 3 H), 1.20-1.15 (m, 3 H), 1.09 (s, 18 H); <sup>13</sup>C NMR (125 MHz, CDCl<sub>3</sub>) δ 152.45, 133.74, 122.43, 116.60, 111.55, 64.89, 60.72, 56.38, 18.30, 12.29; IR (neat, cm<sup>-1</sup>): 1488, 1457, 1297, 1035; MS (ESI): *m/z*: 427.1 [M+Na]<sup>+</sup>.

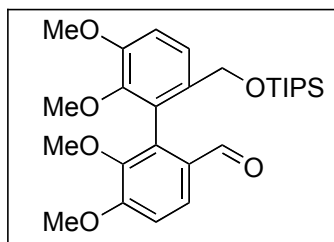

**Synthesis of the biphenyl-2'-triisopropylsilyloxymethyl-2-carboxaldehyde.** To a solution of the TIPS ether from the previous step (806 mg, 2.0 mmol) in THF (8 mL) at -78 °C was added dropwise *n*-BuLi (2.5 M in hexane, 1.04 mL, 2.6 mmol). After stirring at the same temperature for 60 min, trimethylborate (0.33



mL, 3.0 mmol) was added slowly and the solution was allowed to warm to rt overnight. Hydrochloric acid (1 M, 3 mL) was added to the reaction mixture and it was left to stir for 30 min. The volatile materials were removed *in vacuo* and ~~replaced with~~ ether (50 mL). <sup>was added.</sup> The organic layer was washed with water, brine and dried over Na<sub>2</sub>SO<sub>4</sub>. The solvent was evaporated under reduced pressure to afford the crude boronic acid, which was used without further purification. To 2-bromo-3,4-dimethoxybenzaldehyde described in the first procedure (396 mg, 1.6 mmol) in DME (6 mL) under an atmosphere of nitrogen was added the crude boronic acid (710 mg) from the above reaction followed by and 2 mL of 2 M sodium carbonate solution. To this mixture was added *tetrakis*-(triphenylphosphine)palladium, and the reaction was heated at reflux for 12 h. The reaction mixture was diluted with diethyl ether and the solution was washed successively with 2 N sodium hydroxide solution, water, brine and dried over Na<sub>2</sub>SO<sub>4</sub>. The organic layer was evaporated under reduced pressure to afford the crude product which was purified by column chromatography on silica gel using 15 % EtOAc/hexane as the eluent to yield the biphenylcarboxaldehyde (536 mg, 1.1 mmol) in overall 68% yield for two steps as a viscous oil. <sup>1</sup>H NMR (400 MHz, CDCl<sub>3</sub>) δ 7.82 (d, *J* = 8.8 Hz, 1 H), 7.32 (d, *J* = 8.4 Hz, 1 H), 7.02 (t, *J* = 8.8 Hz, 2 H), 4.39 (d, *J* = 12 Hz, 1 H), 4.24 (d, *J* = 12 Hz, 1 H), 3.95 (s, 3 H), 3.89 (s, 3 H), 3.59 (s, 3 H), 3.58 (s, 3 H), 1.08-0.95 (m, 21 H); <sup>13</sup>C NMR (100 MHz, CDCl<sub>3</sub>) δ 191.07, 157.82, 151.56, 146.59, 146.34, 134.63, 133.20, 128.32, 125.99, 124.44, 122.68, 112.49, 111.71, 63.22, 60.63, 60.51, 56.13, 55.94, 18.14, 12.11.

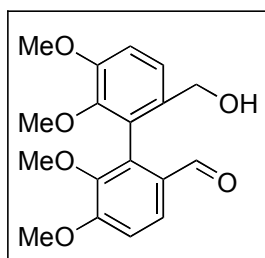

**Biphenyl-2'-hydroxymethyl-2-carboxaldehyde.** To a stirred solution of the TIPS ether from the previous step (1.27 g, 2.6 mmol) in THF (6.0 mL) was added TBAF (1 M in THF, 3.12 mL, 3.12 mmol) at 0 °C and stirring was continued at the same temperature for 2 h. The solvent was evaporated under reduced pressure to afford the crude product which was purified by silica gel chromatography using 35 % EtOAc/hexane as the eluent to yield the alcohol (742 mg, 2.2 mmol) in 86% yield as a viscous oil. <sup>1</sup>H NMR (400 MHz, CDCl<sub>3</sub>) δ 9.49 (s, 1H), 7.83 (d, *J* = 8.8 Hz, 1 H), 7.25 (d, *J* = 7.6 Hz, 1 H), 7.06 (d, *J* = 8.8 Hz, 1 H), 7.01 (d, *J* = 8.4 Hz, 1 H), 3.97 (s, 3 H), 3.90 (s, 3 H), 3.60 (s, 6 H); <sup>13</sup>C NMR (100 MHz, CDCl<sub>3</sub>) δ 190.87, 157.90, 152.29, 146.72, 146.13, 134.60, 132.89, 128.42, 127.10, 125.57, 125.15, 112.89, 111.81,

63.71, 60.94, 60.55, 56.16, 55.99; IR (neat,  $\text{cm}^{-1}$ ): 1683, 1491, 1139, 1049, 823, 734; MS (ESI):  $m/z$ : 355.11  $[\text{M}+\text{Na}]^+$ .

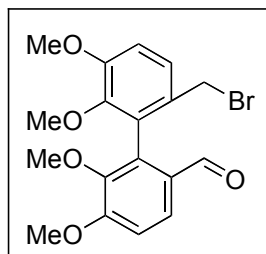

**Synthesis of biphenyl-2'-bromomethyl-2-carboxaldehyde:** To a stirred solution of benzyl alcohol from the previous step (500 mg, 1.5 mmol) in  $\text{CH}_2\text{Cl}_2$  (6.0 mL) at 0 °C was added  $\text{Ph}_3\text{P}$  (524 mg, 2.0 mmol) followed by  $\text{CBr}_4$  (662 mg, 2.0 mmol) and the reaction mixture was gradually brought to room temperature over 12 h. Afterwards, the reaction mixture was

diluted with  $\text{CH}_2\text{Cl}_2$  and washed subsequently with aqueous 0.2 N HCl, water, brine and dried over  $\text{Na}_2\text{SO}_4$ . The solvent was evaporated under reduced pressure to afford the crude product, which was purified by silica gel column chromatography. Elution with 20% EtOAc/hexane provided the benzyl bromide (485 mg, 1.23 mmol) in 82 % yield as a viscous oil.  $^1\text{H}$  NMR (400 MHz,  $\text{CDCl}_3$ )  $\delta$  9.52 (s, 1 H), 7.87 (d,  $J = 8.5$  Hz, 1 H), 7.25 (d,  $J = 8.5$  Hz, 1 H), 7.10 (d,  $J = 8.5$  Hz, 1 H), 6.99 (d,  $J = 8.5$  Hz, 1 H), 4.27 (d,  $J = 10.0$  Hz, 1 H), 4.12 (d,  $J = 10.0$  Hz, 1 H), 3.98 (s, 3 H), 3.91 (s, 3 H), 3.62 (s, 3 H), 3.60 (s, 3 H);  $^{13}\text{C}$  NMR (125 MHz,  $\text{CDCl}_3$ )  $\delta$  190.75, 157.80, 152.89, 147.04, 146.18, 133.57, 129.50, 128.43, 128.37, 126.27, 124.94, 112.85, 112.12, 60.76, 60.53, 56.14, 56.00, 32.51; IR (neat,  $\text{cm}^{-1}$ ): 1682.5, 1488.7, 1260.4, 1139.6, 1024.9, 814.7; MS (ESI):  $m/z$ : 419.02  $[\text{M}+\text{Na}]^+$ .

**Synthesis of aldehyde 5A.** To a stirred solution of compound benzyl bromide from the previous step (500 mg, 1.26 mmol) in DME (8 mL) at room temperature was added  $\text{Pd}_2(\text{dba})_3 \cdot \text{CHCl}_3$  (30 mg, 0.03 mmol) followed by *tris*-2-furylphosphine (30 mg, 0.13 mmol) and the reaction mixture

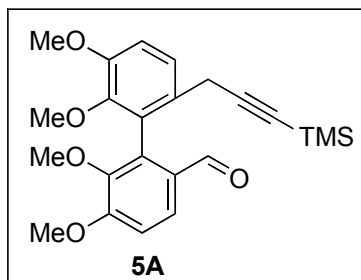

was stirred for 10 min until it became a clear yellow solution. The tributylstannyltrimethylsilylacetylene (619 mg, 1.6 mmol) in DME (1.0 mL) was added to the reaction mixture and stirring was continued at 80 °C for 30 min. Afterwards, the reaction mixture was diluted with  $\text{CH}_2\text{Cl}_2$  and washed with water, brine and dried over  $\text{Na}_2\text{SO}_4$ . The solvent was evaporated under

reduced pressure to afford the crude product, which was purified by silica gel column chromatography. Elution with 20 % EtOAc/hexane provided product **5A** (467 mg, 1.13 mmol) in 90% yield as viscous oil.  $^1\text{H}$  NMR (400 MHz,  $\text{CDCl}_3$ )  $\delta$  9.47 (s, 1 H), 7.81 (d,  $J = 8.4$  Hz, 1 H), 7.29 (d,  $J = 8.4$  Hz, 1 H), 7.04 (d,  $J = 8.4$  Hz, 1 H), 6.98 (d,  $J = 8.4$  Hz, 1 H), 3.96 (s, 3 H),

3.89 (s, 3 H), 3.60 (s, 3 H), 3.59 (s, 3 H), 3.26 (d,  $J = 18.8$  Hz, 1 H), 3.12 (d,  $J = 18.8$  Hz, 1 H), 0.07 (s, 9 H);  $^{13}\text{C}$  NMR (100 MHz,  $\text{CDCl}_3$ )  $\delta$  190.85, 157.94, 151.47, 146.91, 146.26, 134.71, 128.31, 127.31, 124.77, 123.91, 112.76, 111.82, 104.09, 87.21, 60.70, 60.52, 56.12, 56.00, 24.36, 0.14; IR (neat,  $\text{cm}^{-1}$ ): 2838, 1684, 1587, 1487, 1139, 1026; MS (ESI):  $m/z$ : 435.16  $[\text{M}^+\text{Na}]^+$ .

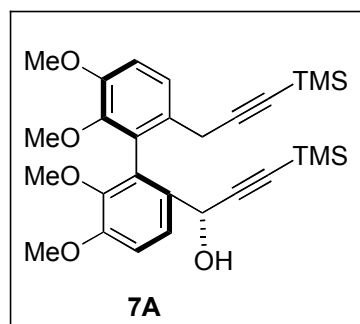

**Synthesis of compound 7A:** To a stirred solution of compound **5A** (412 mg, 1.0 mmol) in dry THF (6 mL) at  $-78^\circ\text{C}$  was added lithium trimethylsilylacetylide (0.5 M in THF, 4.0 mL, 2.0 mmol). After stirring at  $-78^\circ\text{C}$  for 30 min, the reaction was quenched by the addition of saturated aqueous  $\text{NH}_4\text{Cl}$  solution. The reaction mixture was diluted with  $\text{CH}_2\text{Cl}_2$  and washed with water, brine

and dried over  $\text{Na}_2\text{SO}_4$ . The solvent was evaporated under reduced pressure to afford the crude product, which was purified by silica gel column chromatography. Elution with 25% EtOAc/pentane provided product **7A** (438 mg, 0.86 mmol) in 86 % yield as a viscous oil.  $^1\text{H}$  NMR (400 MHz,  $\text{CDCl}_3$ )  $\delta$  7.63 (d,  $J = 8.8$  Hz, 1 H), 7.42 (d,  $J = 8.8$  Hz, 1 H), 7.02 (d,  $J = 8.8$  Hz, 1 H), 6.97 (d,  $J = 8.8$  Hz, 1 H), 4.87 (s, 1 H), 3.89 (s, 3 H), 3.68 (s, 3 H), 3.64 (s, 3 H), 3.60 (s, 3 H), 3.32 (d,  $J = 20.0$  Hz, 1 H), 3.10 (d,  $J = 20.0$  Hz, 1 H), 0.14-0.11 (bs, 18 H);  $^{13}\text{C}$  NMR (100 MHz,  $\text{CDCl}_3$ )  $\delta$  152.78, 151.46, 145.84, 145.75, 132.88, 129.19, 128.98, 128.50, 123.94, 123.64, 112.80, 112.46, 105.26, 104.57, 90.61, 87.61, 62.67, 60.95, 60.71, 56.03, 55.98, 23.88, 0.32, 0.09; IR (neat,  $\text{cm}^{-1}$ ): 2957, 2175, 1488, 1281, 1029, 843; MS (ESI):  $m/z$ : 533.21  $[\text{M}^+\text{Na}]^+$ .

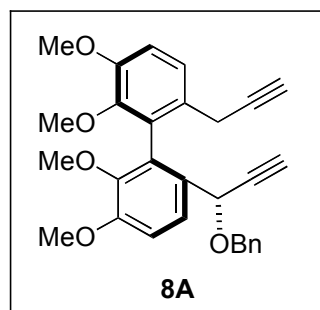

**Synthesis of compound 8A:** To a stirred solution of the compound **7A** (100 mg, 0.2 mmol) in absolute methanol (2.0 mL) was added  $\text{K}_2\text{CO}_3$  (13 mg, 0.1 mmol) at  $0^\circ\text{C}$ , and the mixture was gradually brought to room temperature over 12 h. The solvent was evaporated under reduced pressure to afford the crude product which was diluted with ethyl acetate and washed successively with water, brine and

dried over  $\text{Na}_2\text{SO}_4$ . The organic layer was evaporated under reduced pressure to afford the crude product which was purified by column chromatography on silica gel using 20 % EtOAc/hexane as the eluent to yield the desilylated diyne (70 mg, 0.18 mmol) in 90 % yield as a viscous oil.  $^1\text{H}$  NMR (400 MHz,  $\text{CDCl}_3$ )  $\delta$  7.67 (d,  $J = 8.5$  Hz, 1 H), 7.35 (d,  $J = 8.5$  Hz, 1 H), 7.04 (d,  $J = 8.5$

Hz, 1 H), 6.97 (d,  $J = 8.5$  Hz, 1 H), 4.92 (d,  $J = 2.0$  Hz, 1 H), 3.91 (s, 3 H), 3.88 (s, 3 H), 3.64 (s, 3 H), 3.61 (s, 3 H), 3.24-3.20 (bs, 1 H), 3.25 (dd,  $J = 19.0, 3.0$  Hz, 1 H), 3.08 (dd,  $J = 19.0, 2.5$  Hz, 1 H), 2.48 (d,  $J = 2.0$  Hz, 1 H), 2.05 (t,  $J = 2.5$  Hz);  $^{13}\text{C}$  NMR (100 MHz,  $\text{CDCl}_3$ )  $\delta$  152.63, 151.40, 145.62, 145.50, 132.63, 129.12, 128.70, 128.31, 124.13, 123.52, 112.63, 112.64, 83.53, 81.81, 73.60, 70.55, 62.13, 60.78, 60.47, 55.78, 55.77, 22.46; MS (ESI):  $m/z$ : 389.13  $[\text{M}+\text{Na}]^+$ .

To a solution of the diyne from the previous step (366 mg, 1.0 mmol) in DME (4 mL) at 0 °C was added benzyl bromide (0.48 mL, 4.0 mmol) followed by *n*-tetrabutylammonium iodide (5 mg). After stirring at 0 °C for 20 min, to the above solution was added NaH (50% in paraffin oil, 96 mg, 2.0 mmol). The reaction mixture was stirred at 0 °C for 30 min and quenched with aq. sat.  $\text{NH}_4\text{Cl}$  solution. The reaction mixture was diluted with diethyl ether and washed successively with water, brine and dried over  $\text{Na}_2\text{SO}_4$ . The organic layer was evaporated under reduced pressure to afford the crude product which was purified by column chromatography on silica gel using 10 % EtOAc/hexane as the eluent to get the benzyl ether **8A** (378 mg, 0.83 mmol) in 83% yield as viscous oil.  $^1\text{H}$  NMR (400 MHz,  $\text{C}_6\text{D}_6$ )  $\delta$  7.79 (d,  $J = 8.8$  Hz, 1 H), 7.63 (d,  $J = 8.8$  Hz, 1 H), 7.26 (d,  $J = 7.2$  Hz, 1 H), 7.11 (t,  $J = 7.2$  Hz, 1 H), 7.04 (t,  $J = 7.2$  Hz, 1 H), 6.67 (d,  $J = 8.8$  Hz, 1 H), 6.63 (d,  $J = 8.8$  Hz, 1 H), 5.08 (d,  $J = 2.0$  Hz, 1 H), 4.65 (d,  $J = 11.6$  Hz, 1 H), 4.32 (d,  $J = 11.6$  Hz, 1 H), 3.67 (s, 3 H), 3.65 (s, 3 H), 3.63 (dd,  $J = 19.6, 1.6$  Hz, 1 H), 3.48 (dd,  $J = 19.6, 1.6$  Hz, 1 H), 3.34 (s, 3 H), 3.28 (s, 3 H), 2.16 (d,  $J = 2.4$  Hz, 1 H), 1.95 (t,  $J = 2.8$  Hz, 1 H); IR (neat,  $\text{cm}^{-1}$ ): 2938, 1733, 1576, 1489, 1456, 1268; MS (ESI):  $m/z$ : 479.18  $[\text{M}+\text{Na}]^+$ .

**Synthesis of 9.** See reference 3.

**Synthesis of 10.** See reference 4.

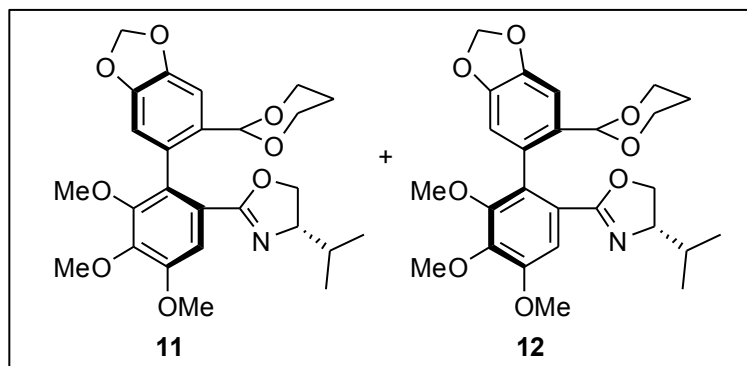

**Synthesis of biaryls 11 and 12:** To a solution of 4.4 g (15.3 mmol) of aryl bromide **10** in 40 mL of anhydrous THF was added 0.76 g (31.6 mmol) of Mg turnings, and then the reaction was brought to reflux under  $\text{N}_2$ . A solution of 3.04

g (16.2 mmol) of 1, 2-dibromoethane in 5 mL of THF was added in portions over 1 h. Refluxing was continued until there was complete disappearance of bromide as monitored by TLC (ca. 2 h). To this refluxing solution, a solution of 2.50 g (8.1 mmol) of oxazoline **9** in 20 mL of THF was added, and after refluxing for 18 h, oxazoline was completely consumed. The reaction was cooled to room temperature, quenched with 30 mL of sat.  $\text{NH}_4\text{Cl}$ , separated, the organic portion was washed with brine (2 X 30 mL), dried over  $\text{MgSO}_4$ , and concentrated to obtain a crude brown oil. The crude oil was purified by flash chromatography (EtOAc: hexanes = 1:10 to 2:1) to afford **11** as a yellow oil (1.57 g, 40%) and **12** as a yellow oil (1.77 g, 45%).

Compound **11**:  $[\alpha]_D -33.6$  (*c* 0.5,  $\text{CHCl}_3$ ).  $^1\text{H}$  NMR (400 MHz,  $\text{CDCl}_3$ )  $\delta$  7.18 (s, 1 H), 7.17 (s, 1 H), 6.62 (s, 1 H), 5.98 (d,  $J = 1.2$  Hz, 1 H), 5.94 (d,  $J = 1.2$  Hz, 1 H), 5.05 (s, 1 H), 4.11-4.05 (m, 1 H), 3.99-3.96 (m, 1 H), 3.95 (s, 3 H), 3.78-3.64 (m, 3 H), 3.60 (s, 3 H), 3.56-3.50 (m, 1 H), 2.11-2.04 (m, 1 H), 1.66-1.63 (m, 1 H), 1.27-1.22 (m, 1 H), 0.94 (d, 6.4 Hz, 3 H), 0.79 (d, 6.4 Hz, 3 H);  $^{13}\text{C}$  NMR (100 MHz,  $\text{CDCl}_3$ )  $\delta$  164.14, 152.55, 146.98, 146.94, 144.20, 131.19, 129.02, 127.06, 124.24, 110.15, 108.32, 106.01, 101.02, 99.87, 72.63, 70.89, 67.21, 67.15, 60.89, 60.79, 60.38, 56.12, 32.78, 25.63, 21.03, 19.32, 18.40; IR (neat,  $\text{cm}^{-1}$ ): 2960, 1649, 1484, 1415, 1369, 1274, 1259, 1108, 750; HRMS (ESI)  $[\text{M}+\text{H}^+]$  *m/z* calcd for  $\text{C}_{26}\text{H}_{32}\text{NO}_8$  486.2122, found 486.2110.

Compound **12**:  $[\alpha]_D -6.5$  (*c* 0.675,  $\text{CHCl}_3$ ).  $^1\text{H}$  NMR (400 MHz,  $\text{CDCl}_3$ )  $\delta$  7.16 (s, 1 H), 7.15 (s, 1 H), 6.66 (s, 1 H), 5.96 (d,  $J = 2$  Hz, 2 H), 5.02 (s, 1 H), 4.081-4.00 (m, 4 H), 3.95 (s, 3 H), 3.93 (s, 3 H), 3.85-3.72 (m, 3 H), 3.71-3.65 (dt,  $J = 12$  Hz, 2.4 Hz, 1 H), 3.59-3.52 (m, 1 H), 3.56 (s, 3 H), 2.12-2.04 (m, 1 H), 1.65-1.62 (m, 1 H), 1.26-1.23 (m, 1 H), 0.83 (d, 6.8 Hz, 3 H), 0.81 (d, 6.8 Hz, 3 H);  $^{13}\text{C}$  NMR (100 MHz,  $\text{CDCl}_3$ )  $\delta$  164.07, 152.53, 151.96, 147.05, 144.28, 131.02, 128.82, 126.93, 124.52, 110.32, 108.14, 106.07, 101.03, 99.91, 72.27, 70.59, 67.25, 67.10, 60.95, 60.77, 56.04, 32.66, 25.59, 18.69, 18.25; IR (neat,  $\text{cm}^{-1}$ ): 2959, 1484, 1467, 1415, 1369, 1274, 1259, 1108, 1038, 764, 750. HRMS (ESI)  $[\text{M}+\text{H}^+]$  calcd for  $\text{C}_{26}\text{H}_{32}\text{NO}_8$  486.2122, found 486.2113.

### Hydrolysis of **11** to **13**, and lithium trimethylsilylacetylide addition to **13**. Synthesis of **15**.

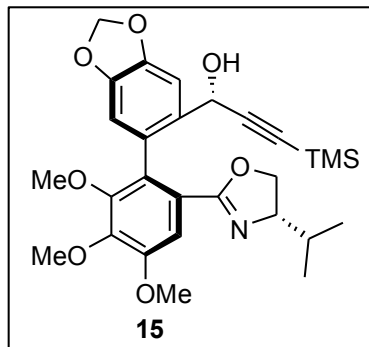

To a solution of 1.33 g (2.74 mmol) of biaryl oxazoline **11** in 30 mL of THF/CH<sub>2</sub>Cl<sub>2</sub> (v:v = 1:1) at -10 °C was added 9.1 mL (27.4 mmol) of 3M HCl solution dropwise. After stirring at this temperature for 1h, TLC showed full conversion of the oxazoline. The temperature was allowed to warm to 0 °C and 3.79 g (27.4 mmol) of solid K<sub>2</sub>CO<sub>3</sub> was added in portions to quench the reaction. Cold ether (0°C) was used for quick extraction and the

combined organic phase was dried over anhydrous MgSO<sub>4</sub> at 0 °C. After filtration and removal of the solvent under vacuum at 0 °C, the crude aldehyde as a yellow oil was used directly for the next step without further purification. The crude aldehyde was redissolved in 50 mL THF at -78 °C. To this solution was added a solution of 27.4 mL (0.5 M, 13.7 mmol) of LiC≡CTMS in THF dropwise at -78°C. After stirring for 30 min at this temperature, the solution was allowed to warm to room temperature before it was quenched with saturated aq. NH<sub>4</sub>Cl solution. After ether extraction, drying with anhydrous MgSO<sub>4</sub>, filtration and removal of the solvent under vacuum, the crude product was obtained as a yellow oil. Flash column (CH<sub>2</sub>Cl<sub>2</sub>) gave **15** as a light yellow foam (1.20 g, 83% yield). [ $\alpha$ ]<sub>D</sub> 80 (*c* 0.25, CHCl<sub>3</sub>); <sup>1</sup>H NMR (400 MHz, CDCl<sub>3</sub>):  $\delta$  7.41 (s, 1 H), 6.98 (s, 1 H), 6.41 (s, 1 H), 5.98 (d, *J* = 1.2 Hz, 1 H), 5.93 (d, *J* = 1.2 Hz, 1 H), 5.22 (s, 1 H), 4.27 (dd, *J* = 8.4 Hz, 10 Hz, 1 H), 3.97 (m, 1 H), 3.94 (s, 3 H), 3.91 (s, 3 H), 3.67 (3 H), 1.37-1.34 (m, 1 H), 0.62 (d, *J* = 6.8 Hz, 3 H), 0.51 (d, *J* = 6.8 Hz, 3 H), 0.17 (s, 9 H).; <sup>13</sup>C NMR (100 MHz, CDCl<sub>3</sub>)  $\delta$  163.37, 152.98, 151.97, 147.57, 147.06, 144.58, 134.90, 128.79, 127.83, 123.21, 108.82, 108.23, 107.96, 105.67, 101.12, 89.62, 72.14, 70.31, 62.89, 61.01, 60.95, 56.18, 32.63, 18.31, 17.41, -0.07.; IR (neat, cm<sup>-1</sup>): 3193, 2959, 2176, 1650, 1590, 1501, 1481, 1366, 1250, 1233, 1131, 1104, 1053, 1038, 844. HRMS (ESI) [M+H]<sup>+</sup> calcd for C<sub>28</sub>H<sub>36</sub>NO<sub>7</sub>Si 526.2256, found 526.2257.

A sample was recrystallized from CH<sub>2</sub>Cl<sub>2</sub> by slow diffusion of hexane to a concentrated solution at room temperature. Crystallographic Information File is attached to this Supporting Information.

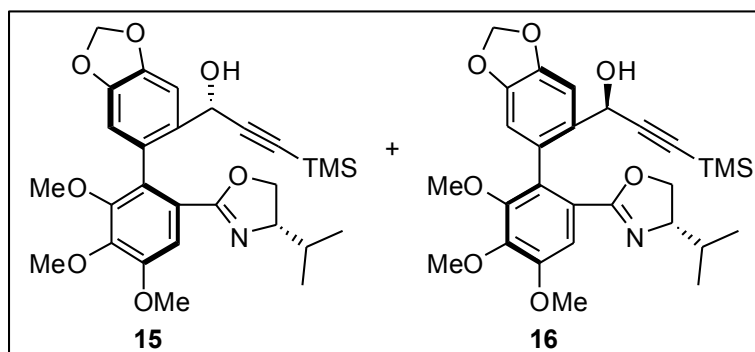

**Synthesis of [13 + 14] from 12, and lithium trimethylsilylacetylide addition to [13 + 14].**

**Synthesis of [15 + 16].** To a solution of 200 mg (0.41 mmol) of biaryl oxazoline **12** in 10 mL of THF/CH<sub>2</sub>Cl<sub>2</sub> (v: v = 1:1) at -10 °C

was added 1.4 mL (4.1 mmol) of 3M HCl solution dropwise. After stirring at this temperature for 1 h, TLC showed about 70% conversion of the oxazoline. The temperature was allowed to warm to 0 °C and 560 mg (4.1 mmol) of solid K<sub>2</sub>CO<sub>3</sub> was added by portion to quench the reaction. Cold ether (0 °C) was used for extraction and the combined organic phase was dried over anhydrous MgSO<sub>4</sub> at 0°C. After filtration and removal of the solvent under vacuum at 0°C, the crude aldehyde as a yellow oil was used directly for the next step without further purification. The crude aldehyde was redissolved in 10 mL of THF at -78°C. To this solution was added a solution of 4.1 mL (0.5 M, 2.05 mmol) of LiC≡CTMS in THF dropwise at -78°C. After stirring for 30 min at this temperature, the solution was allowed to warm to room temperature before it was quenched with saturated aq. NH<sub>4</sub>Cl solution. After ether extraction, drying with anhydrous MgSO<sub>4</sub>, filtration and removal of the solvent under vacuum, the crude product was obtained as a yellow oil. Flash column (CH<sub>2</sub>Cl<sub>2</sub>) gave a mixture of two diastereomers **16** and **15** (molar ratio 3:1 by <sup>1</sup>H NMR) as a white foam (110 mg, 51% yield).

Compound **16** : <sup>1</sup>H NMR (400 MHz, CDCl<sub>3</sub>) δ 7.36 (s, 1H), 6.92 (s, 1H), 6.40 (s, 1H), 6.01 (d, *J* = 1.2 Hz, 1H), 5.98 (d, *J* = 1.2 Hz, 1H), 5.22 (s, 1H), 4.23 (dd, *J* = 8.4 Hz, 10 Hz, 1H), 3.94 (s, 3H), 3.91 (s, 3H), 3.73 (m, 1H), 3.67 (3H), 1.73-1.69 (m, 1H), 0.85 (d, *J* = 6.8 Hz, 3H), 0.80 (d, *J* = 6.8 Hz, 3H), 0.18 (s, 9H). <sup>13</sup>C NMR (100 MHz, CDCl<sub>3</sub>) 163.58, 153.07, 152.01, 147.56, 146.98, 144.40, 134.88, 128.31, 127.59, 123.67, 108.73, 108.25, 107.80, 105.56, 101.21, 89.63, 72.36, 70.13, 62.91, 62.75, 61.04, 56.20, 32.07, 18.72, 17.96, -0.07.

A sample was recrystallized from CH<sub>2</sub>Cl<sub>2</sub> by slow diffusion of hexane to a concentrated solution at room temperature. Crystallographic Information File is attached to this Supporting Information.



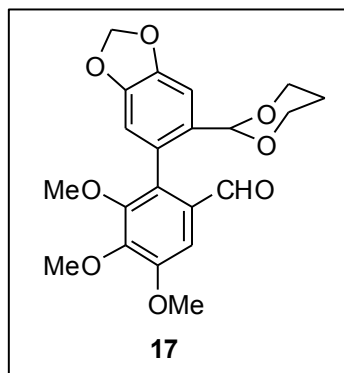

**Hydrolysis of oxazolines [11 +12]. Synthesis of 17.** A mixture of oxazoline **11** and **12** (2.0 g, 4.1 mmol) and MeOTf (1.36 g, 8.2 mmol) in CH<sub>2</sub>Cl<sub>2</sub> (30 mL) was stirred at room temperature for 3 h. To this solution was added at 0°C L-Selectride (1 M in THF, 12.3 mL, 12.3 mmol). The mixture was stirred at 0 °C for 30 min, and then quenched with saturated aq. NH<sub>4</sub>Cl solution. Ether extraction, drying with anhydrous MgSO<sub>4</sub> and removal of the solvent under vacuum gave an oil. To this oil was added CH<sub>2</sub>Cl<sub>2</sub> (50 mL) and

silica gel (10 g) were added. The reaction mixture was vigorously stirred for 18 h at room temperature. After removing the solvent under vacuum, the silica gel was loaded onto a column and column chromatography (EtOAc : Hexanes = 1: 5) afforded the aldehyde **17** (1.32 g, 80% yield) as a yellow solid. <sup>1</sup>H NMR (400 MHz, CDCl<sub>3</sub>) δ 9.45 (s, 1 H), 7.33 (s, 1 H), 7.23 (s, 1 H), 6.66 (s, 1 H), 6.01(d, *J* = 1.2 Hz, 1 H), 5.99(d, *J* = 1.2 Hz, 1 H), 4.91 (s, 1 H), 4.10 (dd, *J* = 5.2 Hz, 7.2Hz, 1 H), 3.99 (s, 3 H), 3.96-3.91 (m, 1 H), 3.65-3.58 (m, 4 H), 3.42 (dt, *J* = 12Hz, , 2.4 Hz, 1 H), 2.09-1.99 (m, 1 H), 1.25-1.18 (m, 1 H).; <sup>13</sup>C NMR (100 MHz, CDCl<sub>3</sub>) δ 190.93, 153.30, 151.19, 147.91, 147.54, 147.27, 132.28, 131.46, 130.33, 125.16, 110.44, 106.54, 104.53, 101.47, 99.69, 67.28, 66.97, 61.03, 60.95, 56.10, 29.68, 25.40.; IR (neat, cm<sup>-1</sup>): 2938, 2855, 1686, 1587, 1481, 1414, 1323, 1258, 1243, 1142, 1110, 1039, 764, 750.; HRMS (ESI) [M+Na<sup>+</sup>] calcd for C<sub>21</sub>H<sub>22</sub>O<sub>8</sub>Na 425.1207, found 425.1201.

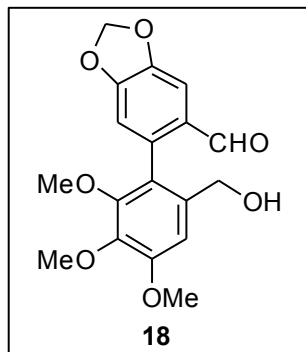

**Synthesis of compound 18:** To a solution of aldehyde **17** (450 mg, 1.12 mmol) in MeOH (10 mL) was added NaBH<sub>4</sub> (85 mg, 2.24 mmol) at 0 °C. After removing the ice bath, the mixture was allowed to warm to room temperature and stirred for 1h. The reaction was quenched with sat. aq. NH<sub>4</sub>Cl solution. Ether extraction, drying with anhydrous MgSO<sub>4</sub> and removal of the solvent under vacuum gave a crude oil. This oil was redissolved in THF/CH<sub>2</sub>Cl<sub>2</sub> (20 mL, v:v = 1:1) at 0 °C. To this solution was added 3M HCl solution (3.7 mL, 11.2 mmol) dropwise. After stirring at 0°C for 1 h, solid K<sub>2</sub>CO<sub>3</sub> (1.55 g, 11.2 mmol) was added by portion to quench the reaction. Ether extraction, drying with anhydrous MgSO<sub>4</sub> and removal of the solvent under vacuum gave an oil. Purification by flash column (EtOAc : Hexanes = 1: 2) gave **18** as a light yellow glassy solid



(317 mg, 82 % yield).  $^1\text{H}$  NMR (400 MHz,  $\text{CDCl}_3$ )  $\delta$  9.49 (s, 1 H), 7.43 (s, 1 H), 6.92 (s, 1 H), 6.69 (s, 1 H), 6.09 (s, 2 H), 4.31 (dd,  $J = 12.8$  Hz, 2 H), 3.92 (s, 3 H), 3.87 (s, 3 H), 3.615 (s, 3 H), 1.89 (br, 1 H).;  $^{13}\text{C}$  NMR (100 MHz,  $\text{CDCl}_3$ )  $\delta$  190.38, 153.81, 152.30, 151.39, 148.01, 141.29, 136.92, 135.05, 129.63, 122.60, 110.92, 106.94, 106.11, 102.15, 62.79, 60.95, 60.85, 56.07.; IR (neat,  $\text{cm}^{-1}$ ): 3429, 2937, 1677, 1611, 1478, 1262, 1139, 1104, 1036, 764, 750.; HRMS (ESI)  $[\text{M}+\text{Na}^+]$  calcd for  $\text{C}_{18}\text{H}_{18}\text{O}_7\text{Na}$  369.0945, found 369.0931.

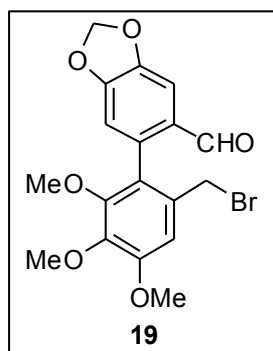

**Synthesis of benzyl bromide 19:** To a solution of  $\text{PPh}_3$  (377 mg, 1.44 mmol) in  $\text{CH}_2\text{Cl}_2$  (10 mL) was added  $\text{CBr}_4$  (478 mg, 1.44 mmol) in one portion at room temperature. The mixture was stirred for 30 min and the mixture turned yellow. To the resulting mixture was added a solution of alcohol **18** (250 mg, 0.72 mmol) dropwise. The mixture was stirred for 12 h. Purification by direct flash column ( $\text{EtOAc}:\text{Hexanes} = 1:3$ ) gave **19** as a light yellow oil, which then was further purified by trituration

with  $\text{Et}_2\text{O}$  to afford a white solid (276 mg, 94 % yield).  $^1\text{H}$  NMR (400 MHz,  $\text{CDCl}_3$ )  $\delta$  9.50 (s, 1 H), 7.49 (s, 1 H), 6.82 (s, 1 H), 6.77 (s, 1 H), 6.13 (d,  $J = 1.2$  Hz, 1 H), 6.11 (d,  $J = 1.2$  Hz, 1 H), 4.25 (d,  $J = 10.4$  Hz, 1 H), 4.15 (d,  $J = 10.4$  Hz, 1 H), 3.93 (s, 3 H), 3.89 (s, 3 H), 3.62 (s, 3 H).  $^{13}\text{C}$  NMR (100 MHz,  $\text{CDCl}_3$ )  $\delta$  189.98, 153.88, 152.29, 151.66, 148.25, 142.34, 136.09, 131.69, 129.78, 124.47, 110.73, 109.21, 106.25, 102.22, 60.99, 60.85, 56.13, 31.74.; IR (neat,  $\text{cm}^{-1}$ ): 3430, 3003, 2935, 2840, 1681, 1612, 1478, 1403, 1333, 1266, 764, 750.; HRMS (ESI)  $[\text{M}+\text{Na}^+]$  calcd for  $\text{C}_{18}\text{H}_{17}\text{BrO}_6\text{Na}$  431.0101, found 431.0104.

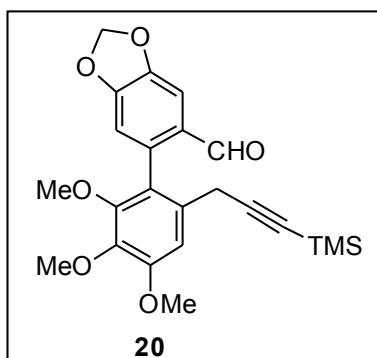

**Synthesis of aldehyde 20:** To a stirred solution of bromide **19** (860 mg, 2.11 mmol) in DME (25 mL) at room temperature was added  $\text{Pd}_2(\text{dba})_3\cdot\text{CHCl}_3$  (39 mg, 0.04 mmol) followed by tris-2-furylphosphine (39 mg, 0.02 mmol) and the reaction mixture was stirred for 10 min until it became a clear yellow solution. Then tributyltintrimethylsilylacetylene (845 mg, 2.18 mmol) in DME (3 mL) was added to the reaction mixture and stirring was continued at 80 °C for 1 h. Afterwards, the reaction mixture was diluted with  $\text{CH}_2\text{Cl}_2$  and washed with water, brine and dried over  $\text{Na}_2\text{SO}_4$ . The solvent was evaporated under reduced

pressure to afford the crude product, which was purified by silica gel column chromatography. Purification by flash column (EtOAc:Hexanes = 1: 5) gave **20** as a white solid (980 mg, 90 % yield).  $^1\text{H}$  NMR (400 MHz,  $\text{CDCl}_3$ )  $\delta$  9.49(s, 1 H), 7.46 (s, 1 H), 6.97 (s, 1 H), 6.67 (s, 1 H), 6.09 (t,  $J$  = 1.2 Hz, 1 H), 4.15 (d,  $J$  = 10.4 Hz, 1 H), 3.93 (s, 3 H), 3.88 (s, 3 H), 3.62 (s, 3 H), 3.28 (d,  $J$  = 19.2 Hz, 1 H), 3.13 (d, 19.2 Hz, 1 H), 0.14 (s, 9 H).;  $^{13}\text{C}$  NMR (100 MHz,  $\text{CDCl}_3$ )  $\delta$  190.20, 153.60, 152.40, 151.53, 148.02, 140.74, 137.27, 130.63, 129.63, 123.14, 110.82, 107.85, 106.09, 103.55, 102.12, 87.67, 60.96, 60.48, 55.94, 24.85, -0.08.; IR (neat,  $\text{cm}^{-1}$ ): 2958, 2850, 1682, 1613, 1478, 1403, 1242, 845.; HRMS (ESI)  $[\text{M}+\text{Na}^+]$  calcd for  $\text{C}_{23}\text{H}_{26}\text{O}_6\text{NaSi}$  449.1391, found 449.1380.

**Addition of lithium trimethylsilylacetylide to 20. Synthesis of 21A.** To a solution of

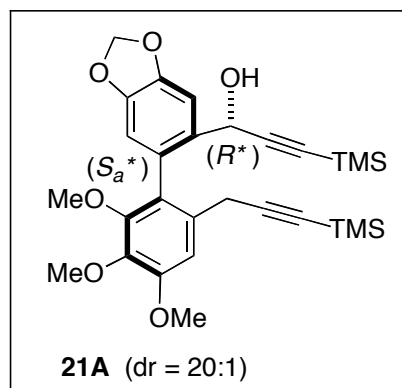

aldehyde **20** (1.0 g, 2.35 mmol) in THF (50 mL) at  $-78^\circ\text{C}$  was added a solution of 27.4 mL (0.5 M, 13.7 mmol) of  $\text{LiC}\equiv\text{CTMS}$  in THF dropwise. After stirring for 30 min at this temperature, the solution was allowed to warm to room temperature before it was quenched with saturated aq.  $\text{NH}_4\text{Cl}$  solution. After ether extraction, drying with anhydrous  $\text{MgSO}_4$ , filtration and removal of the solvent under vacuum, the crude product was obtained as a yellow oil. Flash column (EtOAc:

Hexanes = 1: 4) gave **21A** as a yellow solid (987 mg, 80% yield).  $^1\text{H}$  NMR (400 MHz,  $\text{CDCl}_3$ )  $\delta$  7.40 (s, 1H), 7.10 (s, 1H), 6.58 (s, 1H), 6.03(s, 2H), 4.97 (s, 1H), 3.93 (s, 3H), 3.87 (s, 3H), 3.58 (s, 3H), 3.39 (s, 1H), 3.33(d,  $J$  = 15.6 Hz, 1H), 3.18 (d,  $J$  = 15.6 Hz, 1H).;  $^{13}\text{C}$  NMR (100 MHz,  $\text{CDCl}_3$ )  $\delta$  153.15, 150.51, 147.81, 147.66, 140.89, 133.93, 130.92, 127.65, 125.27, 109.88, 108.44, 108.13, 104.69, 104.69, 104.11, 101.44, 90.75, 87.97, 62.75, 61.47, 61.17, 55.91, 24.60, 0.06, -0.14.; IR (neat,  $\text{cm}^{-1}$ ): 3442, 2958, 2898, 2175, 1599, 1480, 1462, 1402, 1250, 1232, 1140, 1104, 1042, 843, 761.; HRMS (ESI)  $[\text{M}+\text{Na}^+]$  calcd for  $\text{C}_{28}\text{H}_{36}\text{O}_6\text{NaSi}_2$  547.1943, found 547.1940.

A sample was recrystallized from  $\text{CH}_2\text{Cl}_2$  by slow diffusion of hexane to a concentrated solution at room temperature. Crystallographic Information File is attached to this Supporting Information.

**Synthesis of Oxazoline Precursor 22A, 22B and 22C (Scheme 6 in the paper).** The oxazoline precursor **22A** was prepared according to the route described in the scheme below:

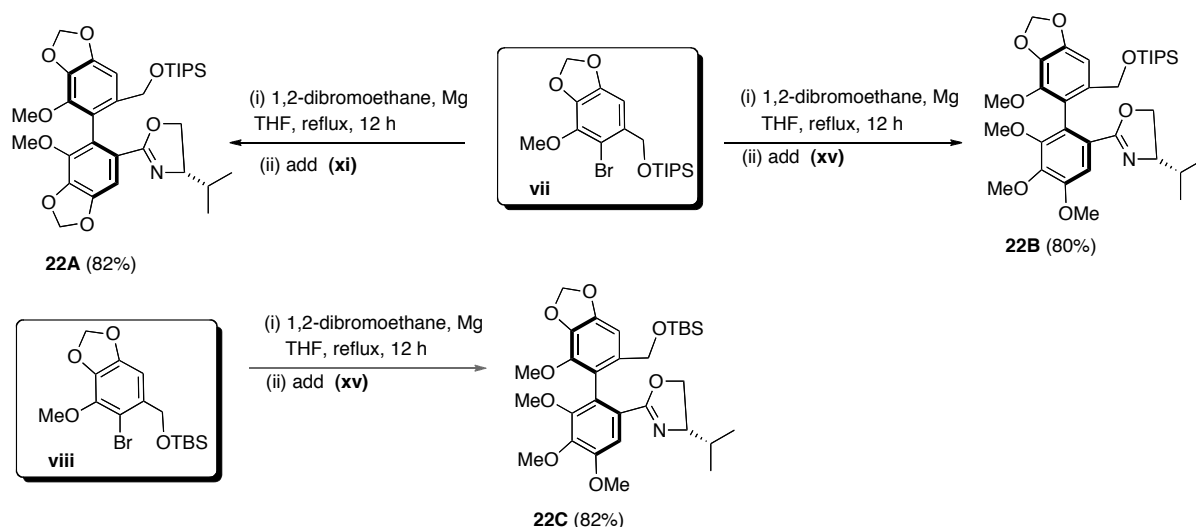

### A. Synthesis of Arylbromides (vii) and (viii)

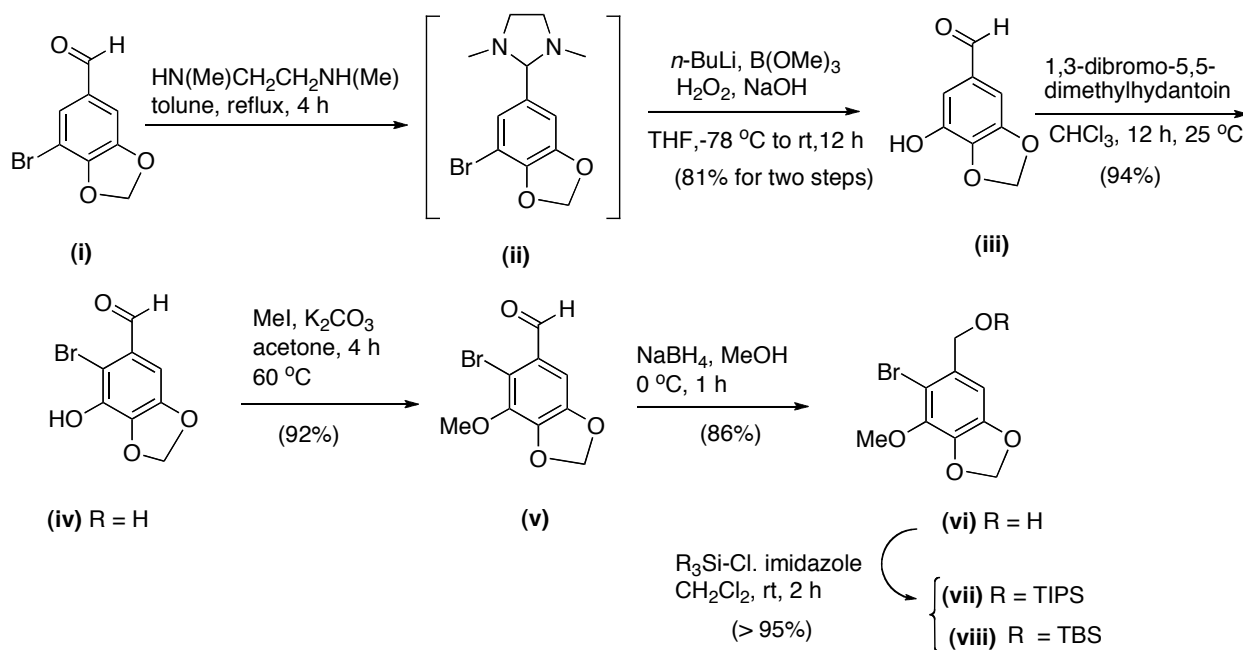

## B. Synthesis of Oxazolines (xi) and (xv)

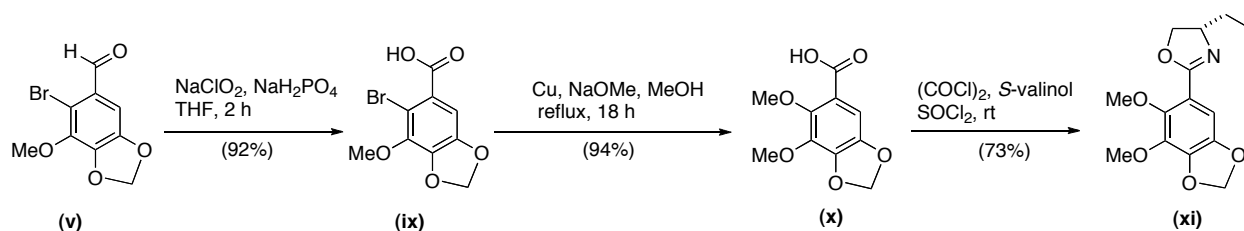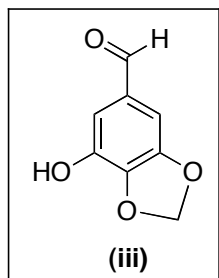

**Synthesis of the compound (iii).** Solution of arylbromide (**i**) (3.68 g, 16.0 mmol) and *N,N'*-dimethylethylenediamine (2.5 mL, 24.0 mmol) in toluene (60 mL) was refluxed at 110 °C for 2 h with azeotropic removal of the H<sub>2</sub>O/toluene mixture by using the Dean Stark trap. After cooling reaction mixture to rt, the organic solvent was evaporated under reduced pressure to afford the crude product (**ii**). To a solution of compound (**ii**) in THF (60 mL)

at −78 °C was added dropwise *n*-BuLi (2.5 M in hexane, 9.6 mL, 24 mmol). After stirring at the same temperature for 15 min, trimethylborate (3.2 mL, 28.8 mmol) was added slowly and the solution was allowed to warm to rt over 2 h. Solution of 0.5 N NaOH (10 mL) followed by 30 % aqueous H<sub>2</sub>O<sub>2</sub> (8.0 mL) were added to the reaction mixture and stirring was continued for further 2 h. The reaction mixture was diluted with ethyl acetate and washed successively with water, brine and dried over Na<sub>2</sub>SO<sub>4</sub>. The organic layer was evaporated under reduced pressure to afford the crude product which was purified by column chromatography on silica gel using 25 % EtOAc/hexane as the eluent to yield (**iii**) in 81% yield (2.02 g, 13 mmol) as solid. <sup>1</sup>H NMR (250 MHz, acetone-d<sub>6</sub>): δ 9.76 (s, 1 H), 7.12 (d, *J* = 1.0 Hz, 1 H), 6.94 (d, *J* = 1.0 Hz, 1 H), 6.12 (s, 2 H), 2.98-2.73 (bs, 1 H), -0.01 (s, 9 H); <sup>13</sup>C NMR (100 MHz, acetone-d<sub>6</sub>): δ 190.05, 149.82, 141.15, 140.02, 132.17, 115.18, 102.44, 100.47; MS (ESI): *m/z*: 189.02 [M+Na]<sup>+</sup>.

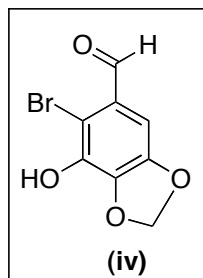

**Synthesis of the compound (iv):** Substrate (**iii**) (332 mg, 2.0 mmol) in CHCl<sub>3</sub> (20 mL) at rt was added solid 1,3-dibromo-5,5-dimethylhydantoin (DBDMH,

291 mg, 1.02 mmol) in parts. Upon initial addition of the DBDMH, the solution became red or deep brown colored, and the next portion of DBDMH was added after the disappearance of color and so on. After stirring at rt for 12 h, the reaction mixture was washed successively with 1 N HCl, water, brine and dried over Na<sub>2</sub>SO<sub>4</sub>. The organic layer was evaporated under reduced pressure to afford the crude product which was purified by column chromatography on silica gel using 35% EtOAc/hexane as the eluent to yield **(iv)** in 94 % yield (456 mg, 1.88 mmol) as a white solid. <sup>1</sup>H NMR (250 MHz, DMSO-d<sub>6</sub>): δ 10.82-10.64 (bs, 1 H), 10.10 (s, 1 H), 6.92 (s, 1 H), 6.17 (s, 2 H); <sup>13</sup>C NMR (100 MHz, DMSO-d<sub>6</sub>): δ 190.94, 148.57, 141.39, 138.55, 128.14, 112.67, 103.30, 100.68.; MS (ESI): m/z: 266.92 [M+Na]<sup>+</sup>.

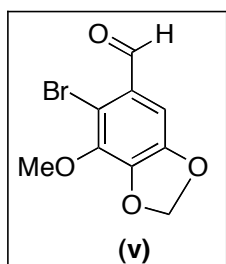

**Synthesis of the compound (v):** To a stirred solution of the compound **(iv)** (486 mg, 2.0 mmol) in acetone (10 mL) was added K<sub>2</sub>CO<sub>3</sub> (552 mg, 4.0 mmol) followed by methyl iodide (1.0 mL) were added at room temperature, and the mixture was gradually brought to 60 °C temperature and stirred for 4 h. The solvent was evaporated under reduced pressure to afford the crude

product, which was diluted with ethyl acetate and washed successively with water, brine and dried over Na<sub>2</sub>SO<sub>4</sub>. The organic layer was evaporated under reduced pressure to afford the crude product which was purified by column chromatography on silica gel using 15 % EtOAc/hexane as the eluent to get **(v)** in 92% yield (472 mg, 1.84 mmol) as a solid. <sup>1</sup>H NMR (250 MHz, CDCl<sub>3</sub>): δ 10.23 (s, 1 H), 7.14 (s, 1 H), 6.06 (s, 2 H), 4.04 (s, 3 H); <sup>13</sup>C NMR (100 MHz, CDCl<sub>3</sub>): δ 190.87, 149.38, 143.16, 140.50, 128.78, 115.95, 103.30, 102.90, 60.57.; MS (ESI): m/z: 280.93 [M+Na]<sup>+</sup>.

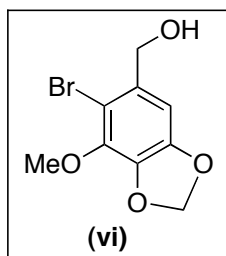

**Synthesis of the compound (vi):** To a solution of aldehyde **(v)** (1.02 g, 4.0 mmol) in MeOH (15 mL) at 0 °C was added NaBH<sub>4</sub> (296 mg, 8.0 mmol) in portions. After stirring at the same temperature for 1 h, the reaction was quenched by the addition of aq. NH<sub>4</sub>Cl (5.0 mL). The organic solvent was evaporated under reduced pressure to afford the crude product, which was

diluted with ethyl acetate and washed successively with water, brine and dried over Na<sub>2</sub>SO<sub>4</sub>. The organic layer was evaporated under reduced pressure to afford the crude product which was purified by column chromatography on silica gel using 35 % EtOAc/hexane the eluent to get the

compound **(vi)** in 86% yield (890 mg, 3.5 mmol) as a viscous oil.  $^1\text{H}$  NMR (400 MHz,  $\text{CDCl}_3$ ):  $\delta$  6.72 (s, 1 H), 5.95 (s, 2 H), 4.63 (s, 2 H), 4.0 (s, 3 H).;  $^{13}\text{C}$  NMR (100 MHz,  $\text{CDCl}_3$ )  $\delta$  148.97, 140.63, 136.96, 134.36, 107.3, 103.6, 101.89, 65.48, 60.33.; MS (ESI):  $m/z$ : 284.95  $[\text{M}+\text{Na}]^+$ .

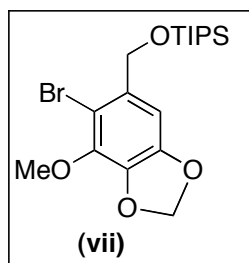

**Synthesis of the compound (vii):** To a stirred solution of compound **(vi)** (647 mg, 2.5 mmol) in  $\text{CH}_2\text{Cl}_2$  (10 mL) at 0 °C was added imidazole (340 mg, 5.0 mmol) followed by TIPS-Cl (0.64 mL, 3.0 mmol) and the reaction mixture was gradually brought to room temperature over 2 h. Afterwards, the reaction mixture was diluted with  $\text{CH}_2\text{Cl}_2$  and washed subsequently with water, brine and dried over  $\text{Na}_2\text{SO}_4$ . The solvent was evaporated under reduced pressure to afford the crude product, which was purified by silica gel column chromatography. Elution with 5 % EtOAc/hexane provided product **(vii)** (1.0 g, 2.37 mmol) in 95% yield as a viscous oil.  $^1\text{H}$  NMR (250 MHz,  $\text{CDCl}_3$ ):  $\delta$  6.90 (s, 1 H), 5.94 (s, 2 H), 4.70 (s, 2 H), 4.01 (s, 3 H), 1.18-1.05 (m, 21 H).;  $^{13}\text{C}$  NMR (100 MHz,  $\text{CDCl}_3$ )  $\delta$  148.96, 140.16, 136.08, 135.42, 104.92, 102.20, 101.64, 65.12, 60.30, 18.26, 12.21.; MS (ESI): 441.08  $m/z$ :  $[\text{M}+\text{Na}]^+$ .

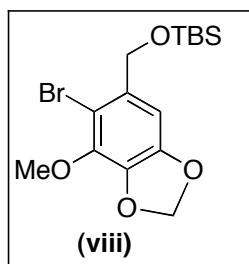

**Synthesis of the compound (viii):** Following the similar procedure, compound **23B** was synthesized from alcohol **(vi)** in 99% yield as a colorless oil.  $^1\text{H}$  NMR (400 MHz,  $\text{CDCl}_3$ ):  $\delta$  6.84 (s, 1H), 5.96 (s, 2H), 4.64 (s, 2H), 4.02 (s, 3H), 0.96 (s, 9H), 0.13 (s, 6H).;  $^{13}\text{C}$  NMR (100 MHz,  $\text{CDCl}_3$ )  $\delta$  148.71, 140.02, 135.99, 134.98, 105.05, 102.19, 101.45, 64.74, 60.09, 25.95, 18.39, -5.34.; IR (neat,  $\text{cm}^{-1}$ ): 2953, 2884, 2856, 1603, 1480, 1412, 1258, 1128, 838, 766, 750.; HRMS (ESI)  $[\text{M}+\text{Na}]^+$  calcd for  $\text{C}_{15}\text{H}_{23}\text{BrO}_4\text{SiNa}$  399.0422, found 399.0424.

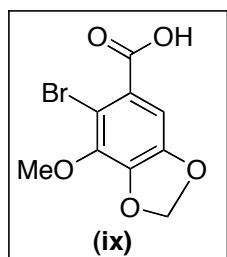

**Synthesis of the compound (ix):** To a stirred solution of **(v)** (837 mg, 3.2 mmol) in 1:1 *t*-BuOH and  $\text{H}_2\text{O}$  (10 mL),  $\text{NaH}_2\text{PO}_4$  (1.15 g, 9.6 mmol) followed by  $\text{NaClO}_2$  (870 mg, 9.6 mmol) were added. After stirring the reaction mixture at the same temperature for 15 min, 2,3-dimethyl-2-butene (32 mL, 1 M in THF) was added to it and stirring was continued at rt for additional 1 h. The reaction mixture was diluted with  $\text{CH}_2\text{Cl}_2$  and washed subsequently with water, brine and dried over  $\text{Na}_2\text{SO}_4$ . The solvent was evaporated under reduced pressure to

afford the product (**ix**) (815 mg, 3.0 mmol) in 92 % yield, which was used in next without further purification.  $^1\text{H}$  NMR (250 MHz,  $\text{CDCl}_3$ ):  $\delta$  7.0 (s, 1 h), 5.94 (s, 2 H), 3.91 (s, 3 H).;  $^{13}\text{C}$  NMR (100 MHz,  $\text{CDCl}_3$ )  $\delta$  167.67, 148.26, 140.90, 140.42, 127.09, 109.05, 105.9, 102.39, 60.33.; MS (ESI):  $m/z$ : 298.92  $[\text{M}+\text{Na}]^+$ .

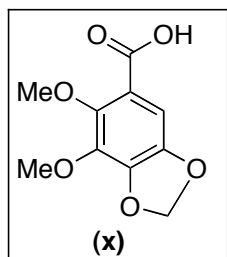

**Synthesis of the compound (x).** To a stirred solution of Na metal (368 mg, 16 mmol) dissolved in anhydrous methanol (21 mL) was added the acid (**ix**) (815 mg, 3.0 mmol). Once the acid (**ix**) had dissolved, Cu powder (102 mg, 1.6 mmol) was added and the mixture refluxed for 12 h. The mixture was cooled, filtered through a bed of Celite, and concentrated in vacuo to give a crude white solid. This was dissolved in 100 mL of water and acidified to pH 3 with concentrated HCl. The solution was extracted with  $\text{CH}_2\text{Cl}_2$  (2 x 100 mL), and the combined organic layer was washed with water, brine and dried over  $\text{Na}_2\text{SO}_4$ . The solvent was evaporated under reduced pressure to afford the product (**x**) in 94 % yield (637 mg, 2.82 mmol), which was used in next step without further purification.  $^1\text{H}$  NMR (250 MHz, acetone- $d_6$ ):  $\delta$  7.0 (s, 1 H), 6.10 (s, 2 H), 4.01 (s, 3 H), 4.91 (s, 3 H), 2.88-2.71 (bs, 1 H).;  $^{13}\text{C}$  NMR (100 MHz,  $\text{CDCl}_3$ )  $\delta$  165.17, 147.79, 145.79, 142.62, 136.66, 115.17, 104.46, 102.71, 63.01, 60.49; MS (ESI):  $m/z$ : 249.03  $[\text{M}+\text{Na}]^+$ .

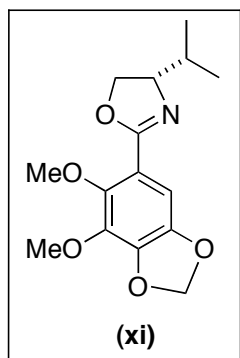

**Synthesis of oxazoline (xi):** To a solution of the acid **x** (1.18 gm, 5.25 mmol) in anhydrous  $\text{CH}_2\text{Cl}_2$  (20 mL) was added oxalyl chloride (1.3 mL, 15.75 mmol) and then 2 drops of DMF. After stirring the reaction mixture under  $\text{N}_2$  at rt for 12 h, the organic solvents were removed in vacuo to afford the acid chloride, which was then dissolved in anhydrous  $\text{CH}_2\text{Cl}_2$  (10 mL) and the solution was added to a solution of *S*-valinol (702 mg, 6.8 mmol) and  $\text{Et}_3\text{N}$  (2.72 mL, 21 mmol) in anhydrous  $\text{CH}_2\text{Cl}_2$  (10 mL) at 0 °C.

The mixture was then stirred at room temperature for 6 h at which time the solvent was evaporated, and the oily residue was dissolved in 50 mL of ethyl acetate. The precipitated trimethylamine hydrochloride was filtered away, and concentration of the filtrate gave the amide. This was dissolved in  $\text{CH}_2\text{Cl}_2$  (20 mL), and thionyl chloride (5 mL) was added. After stirring at rt, the reaction mixture was cooled to 0 °C and carefully quenched with  $\text{H}_2\text{O}$  (20 mL) and



followed by 4 N NaOH (20 mL). After separating organic layer, the aqueous layer was extracted with CH<sub>2</sub>Cl<sub>2</sub>, the combined organic portions was washed with brine and dried over Na<sub>2</sub>SO<sub>4</sub>, filtered, and the solvent removed. On occasion, this was contaminated with the aliphatic chloride, therefore, to induce ring closure, this mixture was refluxed with K<sub>2</sub>CO<sub>3</sub> in (10:1, CH<sub>3</sub>CN-H<sub>2</sub>O), cooled, the CH<sub>3</sub>CN removed, and the aqueous portion extracted with CH<sub>2</sub>Cl<sub>2</sub>. The solvent was evaporated under reduced pressure to afford the crude which was purified by column chromatography on silica gel using 35 % EtOAc/hexane as the eluent to get the oxazoline (**xi**) in 73% yield (1.13 g, 3.82 mmol) as a viscous oil. <sup>1</sup>H NMR (400 MHz, CDCl<sub>3</sub>): δ 6.91 (s, 1 H), 5.94 (s, 2 H), 4.36-4.31 (m, 1 H), 4.08-4.05 (m, 2 H), 3.98 (s, 3 H), 3.80 (s, 3 H), 1.85-1.81 (m, 1 H), 1.0 (d, J = 3 Hz, 3 H), 0.91 (d, J = 6.5 Hz, 3 H); <sup>13</sup>C NMR (125 MHz, CDCl<sub>3</sub>): δ 162.01, 148.16, 144.73, 140.68, 138.18, 115.70, 103.71, 102.13, 72.73, 70.11, 62.16, 60.67, 33.06, 19.03, 18.39; [α]<sub>D</sub> – 46.1 (c 0.78, CHCl<sub>3</sub>); IR (neat):  $\tilde{\nu}$  = 2938, 1647, 1614, 1415 cm<sup>-1</sup>; MS (ESI): 294.14 m/z: [M+H]<sup>+</sup>.

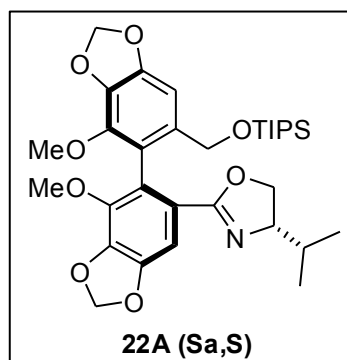

**General Synthesis of Enantiopure Biphenyloxazoline (22A):** To a solution of aryl bromide (**vii**) (2.143 g, 5.12 mmol) in THF (15 mL) was added Mg turnings (249 mg, 10.24 mmol), and then the reaction was brought to reflux under N<sub>2</sub>. A solution of 1,2-dibromoethane (962 mg, 5.12 mmol) in THF (2 mL) was added in portions over 1 h. Refluxing was continued until there was complete disappearance of bromide (**vii**) as monitored by GC. To

this refluxing solution, a solution of oxazoline (**xi**) (1.94 g, 3.84 mmol) in THF (7 mL) was added, and reflux was maintained until oxazoline was completely consumed. The reaction mixture was cooled to room temperature and quenched by the addition of a saturated aqueous NH<sub>4</sub>Cl solution. The aqueous layer was extracted with EtOAc (2 x 100 mL) and the organic layer washed with water, brine and dried over Na<sub>2</sub>SO<sub>4</sub>. The solvent was evaporated under reduced pressure to afford the crude product which was purified by silica gel chromatography using 20 % EtOAc/hexane as the eluent to yield the major compound **22A (Sa,S)** (1.88 g, 3.14 mmol) in 82 % yield as yellow viscous oil. **Major compound 22A (Sa,S):** [α]<sub>D</sub> – 34.2 (c 0.88, CHCl<sub>3</sub>); <sup>1</sup>H NMR (400 MHz, CDCl<sub>3</sub>): δ 7.05 (s, 1H), 6.88 (s, 1 H), 6.00 (d, J = 1.5 Hz, 1 H), 5.98 (d, J = 1.5 Hz, 1 H), 5.92 (d, J = 1.5 Hz, 1 H), 5.91 (d, J = 1.5 Hz, 1 H), 4.38 (d, J = 14 Hz,



1 H), 4.35 (d,  $J = 14$  Hz, 1 H), 4.03 (dd,  $J = 10, 9.5$  Hz, 1 H), 3.81- 3.72 (m, 8 H), 1.57-1.52 (m, 1 H), 1.07-0.98 (m, 21 H), 0.80 (d,  $J = 8.5$  Hz, 3 H), 0.74 (d,  $J = 8$  Hz, 3 H).;  $^{13}\text{C}$  NMR (100 MHz,  $\text{CDCl}_3$ )  $\delta$  163.49, 148.77, 148.67, 141.40, 141.14, 138.95, 135.47, 135.07, 123.44, 123.30, 119.67, 104.74, 101.74, 100.91, 100.80, 72.73, 70.49, 62.90, 59.94, 59.82, 33.08, 18.96, 18.53, 18.26, 12.22.; MS (ESI):  $m/z$ : 600.309  $[\text{M}+\text{Na}]^+$ .

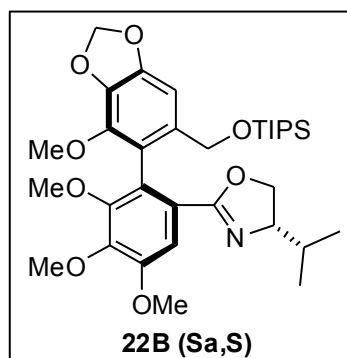

**Synthesis of compound 22B (Sa,S):** Enantiopure compound **22B**

**(Sa,S)** was synthesized from arylbromide (**vii**) and oxazoline (**xv**)

using the procedure described for the synthesis of **22A(Sa,S)** in

80 % isolated yield. **Major compound 22B (Sa,S)** :  $[\alpha]_{\text{D}} - 43.40$

( $c$  1.1,  $\text{CHCl}_3$ ).;  $^1\text{H}$  NMR (400 MHz,  $\text{CDCl}_3$ ):  $\delta$  2.17 (s, 1 H), 6.89

(s, 1 H), 5.92 (d,  $J = 2.0$  Hz, 2 H), 4.30 (dd,  $J = 21.6, 13.6$  Hz, 1 H),

4.07 (t,  $J = 8.8$  Hz, 1 H), 3.90 (s, 3 H), 3.87 (s, 3 H), 3.83-3.74 (m,

4 H), 6.89 (t,  $J = 8.8$  Hz, 1 H), 3.59 (s, 3 H), 1.62-1.56 (m, 1 H), 1.06-0.96 (m, 15 H), 0.82 (d,  $J$

$= 8.2$  Hz, 3 H), 0.75 (d,  $J = 8.2$  Hz, 3 H).;  $^{13}\text{C}$  NMR (100 MHz,  $\text{CDCl}_3$ )  $\delta$  163.75, 152.62, 151.78,

148.73, 144.43, 141.02, 135.36, 134.81, 124.69, 123.56, 119.63, 108.95, 100.85, 100.57, 72.72,

70.44, 62.93, 61.07, 60.90, 59.68, 56.26, 33.01, 18.99, 18.42, 18.23, 12.15.; IR (neat):  $\tilde{\nu} = 1652,$

1457, 1399, 1049, 737, 685  $\text{cm}^{-1}$ .; MS (ESI): 616.338  $m/z$ :  $[\text{M}+\text{H}]^+$ . **Minor compound 22B**

**(Ra,S)**:  $[\alpha]_{\text{D}} + 13.22$  ( $c$  1.8,  $\text{CHCl}_3$ ).;  $^1\text{H}$  NMR (400 MHz,  $\text{CDCl}_3$ ):  $\delta$  7.19 (s, 1 H), 6.88 (s, 1 H),

5.91 (d,  $J = 2.8$  Hz, 2 H), 4.31-4.24 (m, 2 H), 4.07-3.78 (m, 11 H), 3.59 (s, 3 H), 1.66-1.50 (m, 1

H), 1.18-0.85 (m, 21 H), 0.77 (d,  $J = 7.8$  Hz, 3 H), 0.75 (d,  $J = 7.8$  Hz, 3 H).;  $^{13}\text{C}$  NMR (125

MHz,  $\text{CDCl}_3$ ):  $\delta$  152.65, 151.80, 148.77, 141.32, 134.90, 134.76, 119.55, 109.0, 100.811,

100.402, 71.61, 70.36, 62.83, 61.04, 60.88, 59.60, 32.87, 18.83, 18.20, 12.13.; MS (ESI):

616.338  $m/z$ :  $[\text{M}+\text{H}]^+$ .

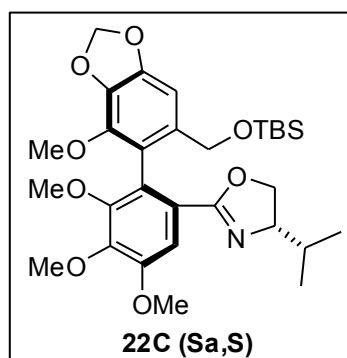

**Synthesis of compound 22C (Sa,S):** Enantiopure compound **22C**

**(Sa,S)** was synthesized from arylbromide (**viii**) and oxazoline (**xv**)

using the procedure described for the synthesis of **22C (Sa,S)** in

82 % isolated yield. **Major compound 22C (Sa,S)**:  $[\alpha]_{\text{D}} - 48.5$  ( $c$

0.935,  $\text{CHCl}_3$ ).;  $^1\text{H}$  NMR (400 MHz,  $\text{CDCl}_3$ ):  $\delta$  7.18 (s, 1H), 6.81

(s, 1 H), 5.93-5.92 (m, 2 H), 4.28 (d,  $J = 13.6$  Hz, 1 H), 4.21 (d,  $J =$

13.6 Hz, 1H), 4.11-4.07 (m, 1H), 3.93 (s, 3H), 3.91 (s, 3H), 3.78 (s,

3 H), 3.69 (t,  $J = 7.6$  Hz, 1 H), 3.62 (s, 3 H), 1.62-1.55 (m, 1 H), 0.85 (s, 9 H), 0.83 (d,  $J = 6.8$  Hz,

1 H), 0.77(d,  $J = 6.8$  Hz, 1 H), -0.05 (s, 3 H), -0.06 (s, 3 H).;  $^{13}\text{C}$  NMR (100 MHz,  $\text{CDCl}_3$ )  $\delta$  163.59, 152.47, 151.63, 148.52, 144.21, 140.86, 134.92, 134.72, 124.46, 123.36, 119.68, 108.72, 100.66, 100.60, 72.52, 70.23, 62.63, 60.85, 60.68, 59.45, 56.01, 32.74, 25.94, 18.74, 18.31, 18.21-5.42, -5.45.; IR (neat,  $\text{cm}^{-1}$ ): 2952, 2856, 1651, 1622, 1454, 1368, 1278, 1079, 980, 775, 749.; HRMS (ESI)  $[\text{M}+\text{H}]^+$  calcd for  $\text{C}_{30}\text{H}_{44}\text{NO}_8\text{Si}$  574.2831, found 574.2830.

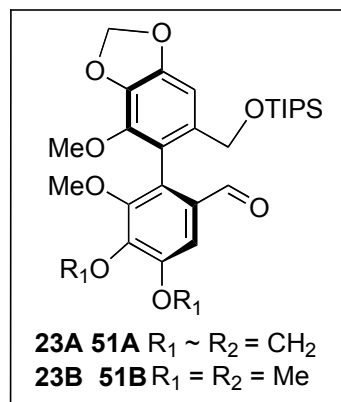

**Synthesis of the compound 23A:** To a solution of **22A** (*Sa,S*) (610 mg, 2.0 mmol) in  $\text{CH}_2\text{Cl}_2$  (10 mL) at 0 °C was added 2,6-di-*tert*-butylpyridine (573 mg, 3.0 mmol) followed by methyltriflate (0.26 mL, 2.4 mmol), and the mixture was stirred at 0 °C for 30 min. After addition of L-Selectride (1 M in THF, 6.0 mL, 6.0 mmol), the mixture was further stirred at 0 °C for 30 min, and then a saturated aqueous solution of citric acid and a small amount of silica gel were added. The reaction mixture was vigorously stirred for 4 h at 0 °C

and was brought back to room temperature. The mixture was extracted with  $\text{CH}_2\text{Cl}_2$ . The combined organic extracts were dried over  $\text{Na}_2\text{SO}_4$  and concentrated under reduced pressure to afford the crude product which was purified by silica gel chromatography using 10% EtOAc/hexane as the eluent to yield compound (**23A**, 935 mg, 1.81 mmol) in 88% yield as a viscous oil.  $[\alpha]_{\text{D}} - 4.8$  ( $c$  1.5,  $\text{CHCl}_3$ );  $^1\text{H}$  NMR (400 MHz,  $\text{CDCl}_3$ ):  $\delta$  9.48, (s, 1 H), 7.24 (s, 1 H), 6.95 (s, 1 H), 6.11 (d,  $J = 1.5$  Hz, 1 H), 6.10 (d,  $J = 1.2$  Hz, 1 H), 6.02 (d,  $J = 1.2$  Hz, 1 H), 6.01 (d,  $J = 1.2$  Hz, 1 H), 4.38 (d,  $J = 13.5$  Hz, 1 H), 4.26 (d,  $J = 13.5$  Hz, 1 H), 3.87 (s, 3 H), 3.86 (s, 3 H), 1.08-0.98 (m, 21 H);  $^{13}\text{C}$  NMR (100 MHz,  $\text{CDCl}_3$ ):  $\delta$  190.66, 149.84, 149.60, 142.16, 141.39, 141.15, 135.78, 135.20, 130.16, 129.09, 115.83, 102.21, 101.82, 101.31, 101.05, 63.13, 59.99, 59.70, 27.12, 18.16, 11.96.; IR (neat,  $\text{cm}^{-1}$ ): 2943, 1682, 1475, 1285.; MS (ESI):  $m/z$ : 539.209  $[\text{M}+\text{Na}]^+$ .

**Compound 23B:** Following the similar procedure, compound **23B** was synthesized from biphenyloxazoline **22B** (*Sa,S*) in 88 % isolated yield.  $[\alpha]_{\text{D}} + 55.20$  ( $c$  0.5,  $\text{CHCl}_3$ );  $^1\text{H}$  NMR (400 MHz,  $\text{CDCl}_3$ ):  $\delta$  9.52 (s, 1 H), 7.32 (s, 1 H), 6.89 (s, 1 H), 5.97 (t,  $J = 2.2$  Hz, 2 H), 4.38 (d,  $J = 12.8$  Hz, 1 H), 4.17 (d,  $J = 12.8$  Hz, 1 H), 3.94 (s, 3 H), 3.93 (s, 3 H), 3.82 (s, 3 H), 3.59 (s, 3 H), 1.01-0.92 (m, 21 H).;  $^{13}\text{C}$  NMR (125 MHz,  $\text{CDCl}_3$ )  $\delta$  191.41, 153.40, 151.60, 149.81, 147.81, 141.29, 135.86, 134.93, 130.24, 128.23, 115.68, 105.21, 101.76, 101.27, 63.23, 61.22, 61.06,

59.63, 56.28, 18.15, 12.08; IR (neat,  $\text{cm}^{-1}$ ): 1684, 1456, 1323, 1197, 1049, 881, 735.; MS (ESI):  $m/z$ : 555.249  $[\text{M}+\text{Na}]^+$ .

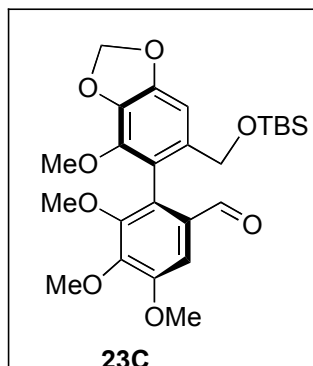

**Synthesis of compound 23C.** Following the similar procedure, compound **23C** was synthesized from biphenyloxazoline **22C** (*Sa,S*) in 90 % yield.  $[\alpha]_D -13.3$  ( $c$  0.87,  $\text{CHCl}_3$ ).  $^1\text{H}$  NMR (400 MHz,  $\text{CDCl}_3$ ):  $\delta$  9.54 (s, 1H), 7.35 (s, 1H), 6.83 (s, 1H), 6.00 (d,  $J = 1.2$  Hz, 1H), 5.99 (d,  $J = 1.2$  Hz, 1H), 4.29 (d,  $J = 12.8$  Hz, 1H), 4.13 (d,  $J = 12.8$  Hz, 1H), 3.97 (s, 3H), 3.96 (s, 3H), 3.84 (s, 3H), 3.63 (s, 3H), 0.83 (s, 9H), -0.07 (s, 3H), -0.08 (s, 3H).;  $^{13}\text{C}$  NMR (100 MHz,

$\text{CDCl}_3$ )  $\delta$  191.20, 153.23, 151.38, 149.56, 147.17, 135.29, 134.92, 130.09, 128.07, 115.93, 104.99, 101.88, 101.09, 67.96, 62.97, 61.00, 60.83, 59.42, 56.05, 25.88, 25.61, 18.32, -5.52, -5.54.; IR (neat,  $\text{cm}^{-1}$ ): 2956, 2866, 1645, 1260, 1152, 765, 750.; HRMS (ESI)  $[\text{M}+\text{Na}]^+$  calcd for  $\text{C}_{25}\text{H}_{34}\text{O}_8\text{SiNa}$  513.1915, found 513.1917.

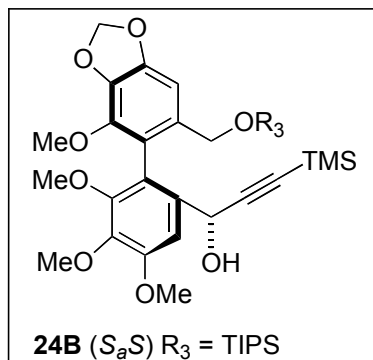

**Synthesis of the compound 24B:** To a stirred solution of compound (**23B**) (1.06 g, 2.0 mmol) in dry THF (10 mL) at  $-78^\circ\text{C}$  was added lithium trimethylsilylacetylide (0.5 M in THF, 8.0 mL, 4.0 mmol). After stirring at  $-78^\circ\text{C}$  for 30 min, the reaction was quenched by the addition of aq. sat.  $\text{NH}_4\text{Cl}$  solution. The reaction mixture was diluted with  $\text{CH}_2\text{Cl}_2$  and washed with water, brine and dried over  $\text{Na}_2\text{SO}_4$ . The solvent was evaporated

under reduced pressure to afford the crude product, which was purified by silica gel column chromatography. Elution with 25 % EtOAc/pentane provided the **major product** [**24B**(*Sa,S*)] (1.01 g, 1.6 mmol) in 80% yield and **minor product** [**25B**(*Sa,R*)] (151 mg, 0.24 mmol) in 12% yield; **major product** [**24B**(*Sa,S*)]:  $[\alpha]_D -21.5$  ( $c$  1,  $\text{CHCl}_3$ ).;  $^1\text{H}$  NMR (400 MHz,  $\text{CDCl}_3$ ):  $\delta$  7.27 (s, 1 H), 6.95 (s, 1 H), 5.98 (d,  $J = 1.5$  Hz, 1 H), 5.95 (d,  $J = 1.5$  Hz, 1 H), 5.01 (d,  $J = 2.0$  Hz, 1 H), 4.37 (d,  $J = 13.5$  Hz, 1 H), 4.12 (d,  $J = 13.5$  Hz, 1 H), 3.92 (s, 3 H), 3.85 (s, 3 H), 3.83 (s, 3 H), 3.60 (s, 3 H), 2.92 (d,  $J = 2.0$  Hz, 1 H), 1.04-0.86 (m, 21 H), 0.15 (s, 9 H).;  $^{13}\text{C}$  NMR (100 MHz,  $\text{CDCl}_3$ )  $\delta$  153.51, 151.30, 149.46, 142.47, 140.36, 136.13, 135.68, 135.21, 120.95, 117.73, 106.93, 104.96, 101.96, 101.27, 90.90, 63.09, 62.94, 61.01, 60.89, 59.96, 56.00, 18.20, 14.38, 12.10, 0.02.; MS (ESI):  $m/z$ : 653.2505  $[\text{M}+\text{Na}]^+$ .

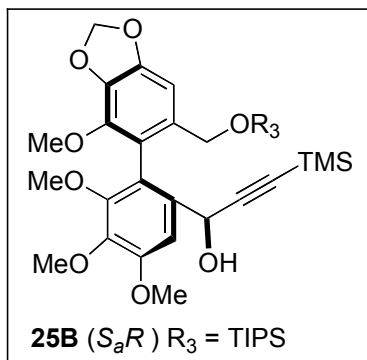

**minor product [25B(*S<sub>a</sub>R*)]:**  $[\alpha]_D + 4.67$  (*c* 0.3,  $\text{CHCl}_3$ );  $^1\text{H}$  NMR (400 MHz,  $\text{CDCl}_3$ ):  $\delta$  7.31 (s, 1 H), 6.98 (s, 1 H), 6.06 (s, 1 H), 6.05 (s, 1 H), 5.16 (s, 1 H), 4.46 (d,  $J = 12.8$  Hz, 1 H), 4.33 (d,  $J = 12.8$  Hz, 1 H), 4.04 (s, 3 H), 4.02 (s, 3 H), 3.94 (s, 3 H), 3.67 (s, 3 H), 1.31-0.99 (m, 21 H), 0.23 (s, 9 H).;  $^{13}\text{C}$  NMR (125 MHz,  $\text{CDCl}_3$ )  $\delta$  153.46, 151.03, 149.32, 142.45, 141.18, 136.52, 136.06, 134.33, 121.59, 120.56, 107.36, 105.61, 103.85, 101.33, 90.52,

63.91, 62.47, 61.11, 60.93, 59.75, 53.63, 31.13, 29.92, 14.33, 12.08, 0.13; MS (ESI):  $m/z$ : 653.2505  $[\text{M}+\text{Na}]^+$ .

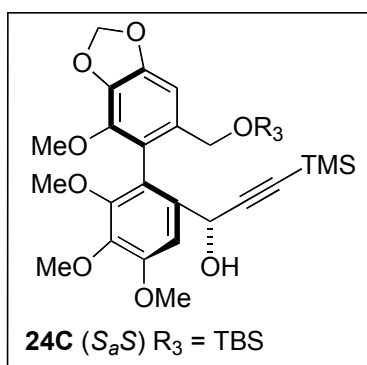

**Synthesis of compound 24C:** Following the similar procedure, **24C(*S<sub>a</sub>S*)** (major product, 90% yield) and **25C(*S<sub>a</sub>R*)** (minor product, 6% yield) were synthesized from **23C**. **Major product 24C(*S<sub>a</sub>S*)** :  $[\alpha]_D -23.4$  (*c* 1.07,  $\text{CHCl}_3$ ).;  $^1\text{H}$  NMR (400 MHz,  $\text{CDCl}_3$ ):  $\delta$  7.28 (s, 1H), 6.88 (s, 1H), 5.99 (d,  $J = 1.2$  Hz, 1H), 5.97 (d,  $J = 1.2$  Hz, 1H), 5.03 (d,  $J = 1.6$  Hz, 1H), 4.29 (d,  $J = 14$  Hz, 1H), 4.09 (d,  $J = 14$  Hz, 1H), 3.95 (s, 3H), 3.89 (s, 3H), 3.84

(s, 3H), 3.63 (s, 3H), 2.87 (d,  $J = 1.6$  Hz, 1H), 0.87 (s, 9H), 0.16 (s, 9H), -0.03 (s, 3H), -0.04 (s, 3H).;  $^{13}\text{C}$  NMR (100 MHz,  $\text{CDCl}_3$ )  $\delta$  153.37, 151.10, 149.25, 142.25, 140.25, 135.66, 135.49, 135.14, 120.79, 117.82, 106.61, 104.84, 101.97, 90.84, 62.87, 62.66, 60.84, 60.73, 59.77, 55.79, 53.41, 25.98, 18.35, -0.16, -5.37, -5.41. IR (neat,  $\text{cm}^{-1}$ ): 3428, 2929, 2884, 1638, 1320, 1146, 1076.; HRMS (ESI)  $[\text{M}+\text{Na}]^+$  calcd for  $\text{C}_{30}\text{H}_{44}\text{O}_8\text{Si}_2\text{Na}$  611.2467, found 611.2463.

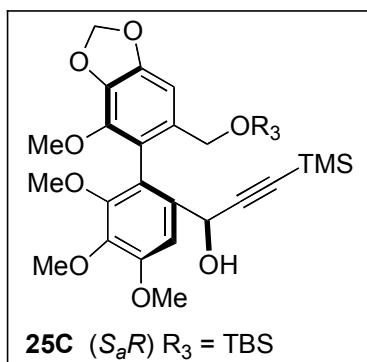

**Minor product 25C(*S<sub>a</sub>R*):**  $[\alpha]_D -5.6$  (*c* 0.9,  $\text{CHCl}_3$ ).;  $^1\text{H}$  NMR (400 MHz,  $\text{CDCl}_3$ )  $\delta$  7.26 (s, 1H), 6.66 (s, 1H), 6.00 (d,  $J = 1.2$  Hz, 1H), 5.98 (d,  $J = 1.2$  Hz, 1H), 5.08 (d,  $J = 1.6$  Hz, 1H), 4.25 (d,  $J = 11.6$  Hz, 1H), 4.15 (d,  $J = 11.6$  Hz, 1H), 3.95 (s, 3H), 3.87 (s, 3H), 3.82 (s, 3H), 3.65 (d,  $J = 1.6$  Hz, 1H), 3.62 (s, 3H), 2.87 (d,  $J = 1.6$  Hz, 1H), 0.80 (s, 9H), 0.15 (s, 9H), 0.02 (s, 3H), -0.01 (s, 3H).;  $^{13}\text{C}$  NMR (100 MHz,  $\text{CDCl}_3$ )  $\delta$  153.26, 150.76, 149.08,

142.11, 141.07, 136.49, 136.08, 133.67, 121.32, 120.78, 107.01, 105.45, 103.89, 101.17, 90.21, 63.90, 62.08, 60.88, 60.69, 59.57, 55.84, 29.70, 26.04, 18.57, -0.09, -5.17, -5.43.; IR (neat,  $\text{cm}^{-1}$ ):

3388, 2940, 2876, 1148, 776.; HRMS (ESI)  $[M+Na]^+$  calcd for  $C_{30}H_{44}O_8Si_2Na$  611.2467, found 611.2462.

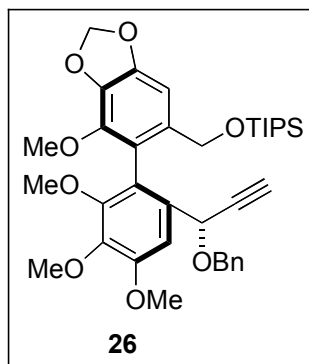

**Synthesis of compound 26:** To a solution of the substrate **24B**(*S<sub>a</sub>R*) (945 mg, 1.5 mmol) in DME (6 mL) at 0 °C was added benzyl bromide (0.72 mL, 6.0 mmol) followed by tetra-*n*-butylammonium iodide (10 mg). After stirring at 0 °C for 20 min, to the above solution was added NaH (50% in paraffin oil, 145 mg, 3.0 mmol). The reaction mixture was stirred at 0 °C for 30 min and quenched with saturated aq  $NH_4Cl$  solution. The reaction mixture was diluted with

diethyl ether and washed successively with water, brine and dried over  $Na_2SO_4$ . The organic layer was evaporated under reduced pressure to afford the crude product which was purified by column chromatography on silica gel using 15 % EtOAc/hexane as the eluent to get the benzyl ether **26** (875 mg, 1.35 mmol) in 90% yield as viscous oil.  $[\alpha]_D - 20.6$  (*c* 0.9,  $CHCl_3$ );  $^1H$  NMR (500 MHz,  $CDCl_3$ ):  $\delta$  7.26-7.15 (m, 6 H), 6.89 (s, 1 H), 5.94 (d, *J* = 1.5 Hz, 1 H), 5.93 (d, *J* = 1.5 Hz, 1 H), 4.53 (d, *J* = 2.5 Hz, 1 H), 4.56 (d, *J* = 11.5 Hz, 1 H), 4.32-4.18 (m, 3 H), 3.91 (s, 3 H), 3.85 (s, 3 H), 3.75 (s, 3 H), 3.60 (s, 3 H), 2.49 (d, *J* = 2.5 Hz, 1 H), 1.08-0.93 (m, 21 H);  $^{13}C$  NMR (100 MHz,  $CDCl_3$ )  $\delta$  153.49, 151.23, 149.28, 142.48, 140.88, 137.70, 135.78, 134.62, 133.41, 128.38, 127.74, 122.01, 117.44, 106.74, 100.92, 100.77, 82.51, 75.24, 70.83, 67.56, 62.87, 60.98, 60.84, 59.37, 56.16, 18.24, 18.22, 14.40, 12.12.; MS (ESI): *m/z*: 671.2866  $[M+Na]^+$ .

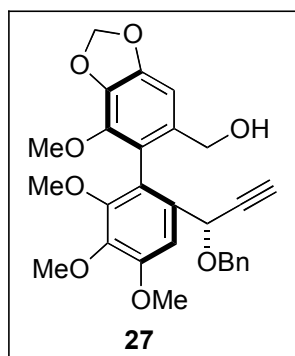

**Synthesis of the compound (27):** To a stirred solution of compound **26** (648 mg, 1.0 mmol) in THF (4.0 mL) was added TBAF (1 M in THF, 1.5 mL, 1.5 mmol) at 0 °C and stirring was continued at the same temperature for 2 h. The solvent was evaporated under reduced pressure to afford the crude product, which was purified by silica gel chromatography using 30 % EtOAc/hexane as the eluent to yield the compound **27**: (457 mg, 0.93 mmol) in 93% yield as a viscous oil.

$[\alpha]_D - 33.5$  (*c* 1,  $CHCl_3$ );  $^1H$  NMR (500 MHz,  $CDCl_3$ ):  $\delta$  7.29-7.23 (m, 5 H), 7.15 (s, 1 H), 6.71 (s, 1 H), 5.95 (s, 2 H), 4.73 (d, *J* = 2.0 Hz, 1 H), 4.63 (d, *J* = 11.6 Hz, 1 H), 4.45 (d, *J* = 11.6 Hz,

1 H), 4.10-4.08 (bs, 2 H), 3.90 (s, 3 H), 3.87 (s, 3 H), 3.75 (s, 3 H), 3.61 (s, 3 H), 2.47 (d,  $J = 2.5$  Hz, 1 H).;  $^{13}\text{C}$  NMR (125 MHz,  $\text{CDCl}_3$ )  $\delta$  153.48, 150.92, 149.26, 142.13, 140.54, 137.40, 135.26, 135.06, 133.57, 128.20, 128.05, 127.61, 121.61, 119.04, 106.05, 103.26, 100.93, 81.96, 74.94, 70.63, 67.32, 63.61, 60.92, 60.89, 59.10, 55.90; MS (ESI):  $m/z$ : 551.1663  $[\text{M}+\text{Na}]^+$ .

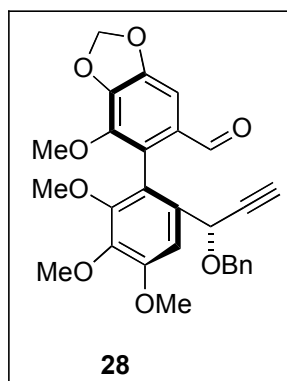

**Synthesis of compound (28):** To a solution of the substrate **27** (240 mg, 0.5 mmol) in  $\text{CH}_2\text{Cl}_2$  (4 mL) at 0 °C was added Dess-Martin periodinane (318 mg, 0.75 mmol). After stirring at rt for 4 h, the reaction mixture was quenched with aq. sat.  $\text{NaHCO}_3$  solution. The reaction mixture was diluted with  $\text{CH}_2\text{Cl}_2$  and washed successively with water, brine and dried over  $\text{Na}_2\text{SO}_4$ . The organic layer was evaporated under reduced pressure to afford the crude product which was purified

by column chromatography on silica gel using 15 % EtOAc/hexane as the eluent to get the aldehyde **28** in 90% yield (214 mg, 0.45 mmol) as viscous oil.  $[\alpha]_D - 11.0$  ( $c$  1,  $\text{CHCl}_3$ ).;  $^1\text{H}$  NMR (500 MHz,  $\text{CDCl}_3$ ):  $\delta$  9.39 (s, 1 H), 7.28-7.22 (m, 6 H), 7.15 (s, 1 H), 6.05 (s, 2 H), 4.70 (d,  $J = 1.6$  Hz, 1 H), 4.60 (d,  $J = 12.0$  Hz, 1 H), 4.40 (d,  $J = 12.0$  Hz, 1 H), 3.92 (s, 3 H), 3.87 (s, 3 H), 3.73 (s, 3 H), 3.63 (s, 3 H), 2.49 (d,  $J = 1.6$  Hz, 1 H).;  $^{13}\text{C}$  NMR (100 MHz,  $\text{CDCl}_3$ )  $\delta$  190.49, 154.32, 151.84, 149.81, 142.15, 141.73, 140.90, 137.37, 133.81, 130.35, 128.43, 128.38, 127.89, 118.84, 105.93, 102.16, 100.77, 81.31, 76.19, 70.81, 67.57, 61.04, 60.87, 59.70, 56.19.; MS (ESI):  $m/z$ : 513.1468  $[\text{M}+\text{Na}]^+$ .

### Synthesis of compounds (29) and (30):

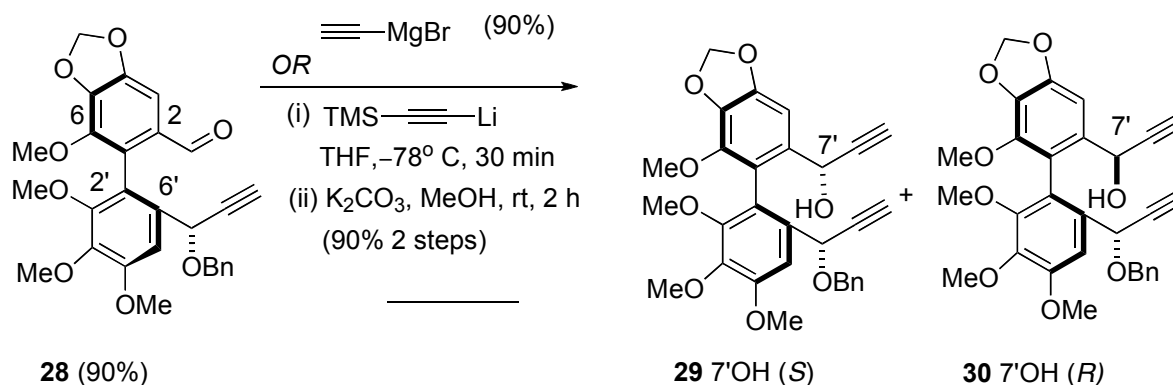

*Addition of Ethynyl Magnesium Bromide.* To a stirred solution of compound **(28)** (245 mg, 0.5 mmol) in dry THF (4 mL) at 0 °C was added ethynyl magnesium bromide (0.5 M in THF, 2.0 mL, 1.0 mmol). After stirring at 0 °C for 30 min, the reaction was quenched by the addition of aq. sat. NH<sub>4</sub>Cl solution. The reaction mixture was diluted with CH<sub>2</sub>Cl<sub>2</sub> and washed with water, brine and dried over Na<sub>2</sub>SO<sub>4</sub>. The solvent was evaporated under reduced pressure to afford the crude product, which was purified by silica gel column chromatography. Elution with 15% EtOAc/hexane provided major product **(29)** (139mg, 0.27 mmol) and minor product **(30)**: (92 mg, 0.18 mmol) in 90% combined yield with 3:2 diastereomeric ratio.

*Addition of Lithium Trimethylsilylacetylide.* To a solution of 200 mg (0.408 mmol) of compound **(28)** in 10 mL THF at -78 °C was added a solution of 2.4 mL (0.5 M, 1.2 mmol) of LiC≡CTMS in THF dropwise. After stirring for 30 min at this temperature, the solution was allowed to warm to room temperature before it was quenched with saturated aq. NH<sub>4</sub>Cl solution. After ether extraction, drying with anhydrous MgSO<sub>4</sub>, filtration and removal of the solvent under vacuum, the crude product was obtained as a yellow oil, which was then dissolved in MeOH (10 mL). To this solution was added K<sub>2</sub>CO<sub>3</sub> (57 mg, 0.408 mmol) and after stirring for 2 hours at room temperature, the solution was quenched with saturated aq. NH<sub>4</sub>Cl solution. After removal of the solvent under vacuum, ether was used for extraction. The combined organic phase was dried over anhydrous Na<sub>2</sub>SO<sub>4</sub>. The solvent was evaporated under reduced pressure to afford the crude product, which was purified by silica gel column chromatography. Elution with 15% EtOAc/hexane provided major product **(29)** (160 mg, 0.24 mmol) and minor product **(30)**: (80 mg, 0.12 mmol) in 90 % combined yield with 2:1 diastereomeric ratio.

Compound **(29)**: [ $\alpha$ ]<sub>D</sub> – 28.6 (*c* 1, CHCl<sub>3</sub>).; <sup>1</sup>H NMR (400 MHz, CDCl<sub>3</sub>):  $\delta$  7.30-7.23 (m, 5 H), 7.17 (s, 1 H), 6.13 (s, 1 H), 5.97 (s, 2 H), 4.92-4.86 (m, 1 H), 4.77 (d, *J* = 2.0 Hz, 1 H), 4.67 (d, *J* = 12.0 Hz, 1 H), 4.49 (d, *J* = 12.0 Hz, 1 H), 3.91 (s, 3 H), 3.86 (s, 3 H), 3.72 (s, 3 H), 3.60 (s, 3 H), 3.26-3.18 (bs, 1 H), 2.47 (d, *J* = 2.0 Hz, 1 H), 2.46 (d, *J* = 2.4 Hz, 1 H).; <sup>13</sup>C NMR (100 MHz, CDCl<sub>3</sub>)  $\delta$  153.97, 150.93, 149.90, 142.28, 140.29, 137.69, 136.10, 135.27, 134.55, 128.52, 128.44, 128.26, 127.93, 120.74, 119.15, 106.06, 102.50, 101.44, 83.53, 81.51, 77.43, 75.60, 73.87, 70.95, 67.59, 63.12, 61.51, 61.31, 59.39, 56.23, 53.62.; MS (ESI): *m/z*: 539.1608 [M+Na]<sup>+</sup>.



**Compound (30):**  $[\alpha]_D +14.8$  ( $c$  0.5,  $\text{CHCl}_3$ ).;  $^1\text{H}$  NMR (400 MHz,  $\text{CDCl}_3$ ):  $\delta$  7.27-7.21 (m, 5 H), 7.11 (s, 1 H), 6.98 (s, 1 H), 5.97 (d,  $J = 1.2$  Hz, 1 H), 5.96 (d,  $J = 1.2$  Hz, 1 H), 5.0-4.92 (m, 1 H), 4.79 (d,  $J = 2.4$  Hz, 1 H), 4.56 (d,  $J = 11.6$  Hz, 1 H), 4.38 (d,  $J = 11.6$  Hz, 1 H), 3.91 (s, 3 H), 3.87 (s, 3 H), 3.74 (s, 3 H), 3.65 (s, 3 H), 2.59 (d,  $J = 2.4$  Hz, 1 H), 2.45 (d,  $J = 2.4$  Hz, 1 H), 2.42-2.33 (bs, 1 H).;  $^{13}\text{C}$  NMR (100 MHz,  $\text{CDCl}_3$ ):  $\delta$  153.97, 151.89, 149.78, 142.56, 140.90, 137.46, 136.58, 134.55, 133.34, 128.48, 128.44, 127.90, 121.50, 120.09, 106.79, 102.02, 101.45, 83.75, 82.99, 77.43, 75.87, 74.11, 70.93, 67.82, 61.90, 61.10, 60.99, 59.56, 56.18.; MS (ESI):  $m/z$ : 539.1608  $[\text{M}+\text{Na}]^+$ .

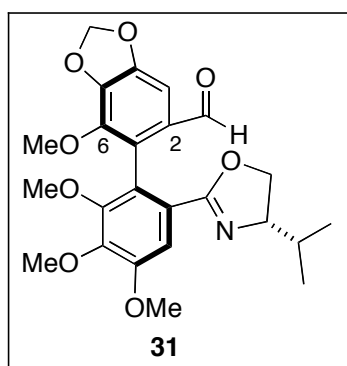

**Synthesis of compound 31:** To a solution of biaryl oxazoline **22C** (**Sa,S**) (250 mg, 0.436 mmol) in THF (10 mL) at room temperature was added 1 M TBAF solution (0.52 mL, 0.52 mmol) dropwise. After stirring for 2 h the reaction was quenched by the addition of saturated aq.  $\text{NH}_4\text{Cl}$  solution. The reaction mixture was diluted with  $\text{CH}_2\text{Cl}_2$  and washed with water, brine and dried over anhydrous  $\text{MgSO}_4$ . The solvent was evaporated under reduced pressure to afford an yellow oil which was then dissolved in

$\text{CH}_2\text{Cl}_2$  (10 mL). To this solution was added pyridinium chlorochromate (187 mg, 0.87 mmol),  $p\text{-TsOH}\cdot\text{H}_2\text{O}$  (165 mg, 0.87 mmol) and Celite (210 mg). After stirring for 18 h,  $\text{Et}_3\text{N}$  (1 mL) was added. The resulting brown suspension was directly loaded into column ( $\text{EtOAc} : \text{hexanes} = 1: 2$ ), which afforded **31** as a light yellow oil (169 mg, 85% from **22C**).  $[\alpha]_D -50.4$  ( $c$  0.635,  $\text{CHCl}_3$ ).;  $^1\text{H}$  NMR (400 MHz,  $\text{CDCl}_3$ ):  $\delta$  9.45 (s, 1 H), 7.24 (s, 1 H), 7.17 (s, 1 H), 6.05 (d,  $J = 1.6$  Hz, 1 H), 6.04 (d,  $J = 1.6$  Hz, 1 H), 6.12-6.08 (m, 1 H), 3.93 (s, 3 H), 3.90 (s, 3 H), 3.84-3.77 (m, 4 H), 3.71 (t,  $J = 8$  Hz, 1 H), 3.62 (s, 3 H), 1.57-1.52 (m, 1 H), 0.77 (d,  $J = 6.8$  Hz, 1 H), 0.73 (d,  $J = 6.8$  Hz, 1 H).;  $^{13}\text{C}$  NMR (100 MHz,  $\text{CDCl}_3$ )  $\delta$  190.30, 162.69, 153.19, 152.11, 149.11, 144.11, 141.66, 141.03, 130.60, 129.99, 124.66, 120.56, 108.56, 101.87, 100.37, 72.74, 70.26, 60.93, 60.69, 59.70, 56.10, 32.78, 18.57, 18.28.; IR (neat,  $\text{cm}^{-1}$ ): 2956, 1682, 1607, 1470, 1392, 1285, 1106.; HRMS (ESI)  $[\text{M}+\text{H}]^+$  calcd for  $\text{C}_{24}\text{H}_{28}\text{NO}_8$  458.1809, found 458.1805.



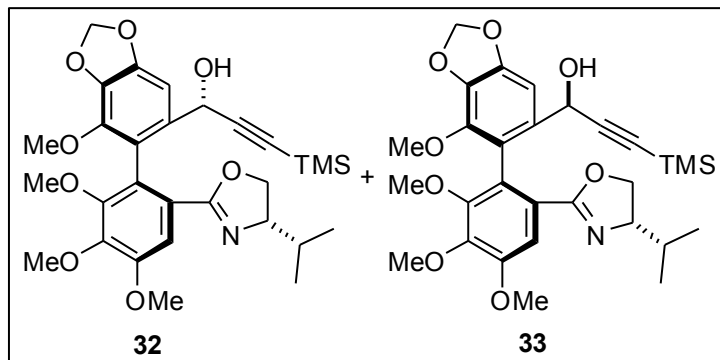

### Synthesis of compounds **32** and **33**.

To a solution of 200 mg (0.438 mmol) of biaryl aldehyde **31** and 203 mg (1.75 mmol, 0.26 mL) of TMEDA in 10 ml THF at  $-78^{\circ}\text{C}$  was added a solution of 2.6 mL (0.5 M, 1.3 mmol) of  $\text{LiC}\equiv\text{CTMS}$  in THF dropwise.

After stirring for 30 min at this temperature, the solution was allowed to warm to room temperature before it was quenched with saturated aq.  $\text{NH}_4\text{Cl}$  solution. After ether extraction, drying with anhydrous  $\text{MgSO}_4$ , filtration and removal of the solvent under vacuum, the crude product was obtained as a yellow oil. Flash column ( $\text{EtOAc} : \text{hexanes} = 1 : 2$ ) gave **32** as a white foam (183 mg, 75% yield) and **33** as a colorless oil (27 mg, 11%).

Compound **32**:  $[\alpha]_{\text{D}}^{25} 72.5$  ( $c$  1.03,  $\text{CHCl}_3$ ).;  $^1\text{H}$  NMR (400 MHz,  $\text{CDCl}_3$ ):  $\delta$  7.16 (s, 1 H), 6.99 (s, 1 H), 6.74 (s, 1 H), 5.96 (d,  $J = 1.2$  Hz, 1 H), 5.90 (d,  $J = 1.2$  Hz, 1 H), 5.13 (s, 1 H), 4.27 (t,  $J = 8.8$  Hz, 1 H), 3.99-3.95 (m, 1 H), 3.93 (s, 3 H), 3.89 (s, 3 H), 3.70 (s, 3 H), 3.66 (s, 3 H), 1.38-1.35 (m, 1 H), 0.64 (d,  $J = 6.8$  Hz, 3 H), 0.53 (d,  $J = 6.8$  Hz, 3 H), 0.14 (s, 9 H).;  $^{13}\text{C}$  NMR (100 MHz,  $\text{CDCl}_3$ ):  $\delta$  163.73, 152.91, 152.20, 149.08, 144.61, 139.99, 136.59, 135.53, 123.66, 123.53, 121.61, 108.23, 105.68, 102.55, 101.09, 89.45, 72.04, 70.32, 62.89, 60.90, 60.78, 59.59, 56.06, 32.75, 18.38, 17.30, -0.10. IR (neat,  $\text{cm}^{-1}$ ): 3186, 2959, 2899, 1651, 1590, 1470, 1366, 1274, 1109, 1058, 981, 846. HRMS (ESI)  $[\text{M}+\text{H}]^+$  calcd for  $\text{C}_{29}\text{H}_{38}\text{NO}_8\text{Si}$  556.2361, found 556.2363.

A sample was recrystallized from ethyl acetate/hexane and the solid state structure was determined by X-ray crystallography. Crystallographic Information File is attached to this Supporting Information.

Compound **33**:  $[\alpha]_{\text{D}}^{25} -33.2$  ( $c$  1.0,  $\text{CHCl}_3$ ).;  $^1\text{H}$  NMR (400 MHz,  $\text{CDCl}_3$ ): 7.19 (s, 1H), 7.04 (s, 1H), 5.96 (d,  $J = 1.2$  Hz, 1H), 5.95 (d,  $J = 1.2$  Hz, 1H), 5.08 (s, 1H), 4.14 (t,  $J = 8\text{Hz}$ , 1H), 3.94-3.89 (s superimposed on a m, 7H), 3.88 (s, 3H), 3.78 (s, 3H), 3.63 (s, 3H), 1.56-1.50 (m, 1H), 0.76 (d,  $J = 0.8$  Hz, 3H), 0.74 (d,  $J = 0.8$  Hz, 3H), 0.12 (s, 9H).;  $^{13}\text{C}$  NMR (100 MHz,  $\text{CDCl}_3$ ):  $\delta$  163.39, 153.83, 151.55, 148.79, 144.29, 140.93, 136.24, 134.09, 124.42, 123.30, 121.77, 108.97, 104.97, 102.61, 101.08, 90.39, 72.34, 70.33, 63.83, 61.05, 60.98, 59.48, 56.02, 32.77, 18.37, 18.34, -0.14. IR (neat,  $\text{cm}^{-1}$ ): 2958, 1475, 1402, 1366, 1108, 845, 756. HRMS (ESI)  $[\text{M}+\text{H}]^+$  calcd for  $\text{C}_{29}\text{H}_{38}\text{NO}_8\text{Si}$  556.2361, found 556.2365.

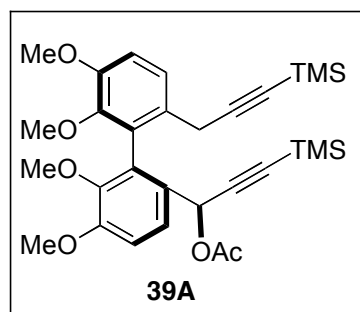

**Synthesis of compound 39A:** To the alcohol **7A** (510 mg, 1.0 mmol) in THF (4 mL) at 0 °C added acetic acid (0.09 mL, 1.5 mmol), triphenylphosphine (393 mg, 1.5 mmol) followed by diethylazodicarboxylate (0.24 mL, 1.5 mmol), and the mixture was gradually brought to room temperature over 12 h. The solvent was evaporated under reduced pressure to afford the crude product

which was purified by column chromatography on silica gel using 20 % EtOAc/hexane as the eluent to yield the major product **39A** C<sub>6</sub>(*R*) (441 mg, 0.8 mmol) in 80% yield and minor product **39B** C<sub>6</sub>(*S*) (83 mg, 0.07 mmol) in 7 % yield as a viscous oil. **Major product 39A** C<sub>6</sub>(*R*): <sup>1</sup>H NMR (400 MHz, CDCl<sub>3</sub>): δ 7.65 (d, *J* = 8.0 Hz, 1 H), 7.35 (d, *J* = 8.0 Hz, 1 H), 6.98 (d, *J* = 8.0 Hz, 1 H), 6.95 (d, *J* = 8.0 Hz, 1 H), 5.99 (s, 1 H), 3.90 (s, 3 H), 3.87 (s, 3 H), 3.67 (s, 3 H), 3.59 (s, 3 H), 3.23 (d, *J* = 20.0 Hz, 1 H), 2.98 (d, *J* = 20.0 Hz, 1 H), 1.84 (s, 3 H), 0.12 (s, 9 H), 0.09 (s, 9 H). **Minor product 39B** C<sub>6</sub>(*R*): <sup>1</sup>H NMR (400 MHz, CDCl<sub>3</sub>): δ 7.55 (d, *J* = 8.0 Hz, 1 H), 7.37 (d, *J* = 8.0 Hz, 1 H), 7.0 (d, *J* = 8.0 Hz, 1 H), 6.95 (d, *J* = 8.0 Hz, 1 H), 5.81 (s, 1 H), 3.89 (s, 3 H), 3.85 (s, 3 H), 3.62 (s, 3 H), 3.59 (s, 3 H), 3.24 (d, *J* = 20.0 Hz, 1 H), 3.11 (d, *J* = 20.0 Hz, 1 H), 1.84 (s, 3 H), 0.13 (s, 18 H).

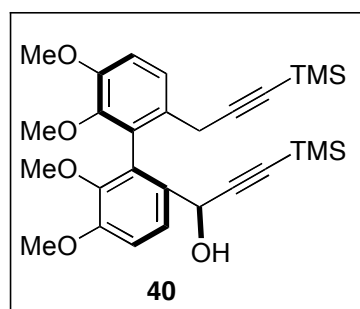

**Synthesis of compound 40:** To a solution of acetate **39A** (414 mg, 0.75 mmol) in CH<sub>2</sub>Cl<sub>2</sub> (3 mL) at -50 °C was added DIBAL-H (1.0 M in hexane, 0.9 mL, 0.9 mmol) dropwise. After stirring at the same temperature for 30 min, the reaction was quenched by the addition of methanol (0.05 mL) followed by 1 N HCl solution (0.5 mL). The aqueous layer was extracted with Et<sub>2</sub>O and the organic

layer washed with water, brine and dried over Na<sub>2</sub>SO<sub>4</sub>. The solvent was evaporated under reduced pressure to afford the crude product, which was purified by silica gel chromatography using 25% EtOAc/hexane as the eluent to yield compound **40** (363mg, 0.71mmol) in 95% yield as viscous oil. <sup>1</sup>H NMR (400 MHz, CDCl<sub>3</sub>): δ 7.49 (d, *J* = 8.0 Hz, 1 H), 7.33 (d, *J* = 8.0 Hz, 1 H), 7.0 (d, *J* = 8.0 Hz, 1 H), 6.96 (d, *J* = 8.0 Hz, 1 H), 5.05 (d, *J* = 0.4 Hz, 1 H), 3.89 (s, 3 H), 3.88 (s, 3 H), 3.64 (s, 3 H), 3.60 (s, 3 H), 3.27 (d, *J* = 20.0 Hz, 1 H), 3.18 (d, *J* = 20.0 Hz, 1 H), 2.75 (d, *J* = 0.4 Hz, 1 H), 0.1 (s, 9 H), 0.08 (s, 9 H).

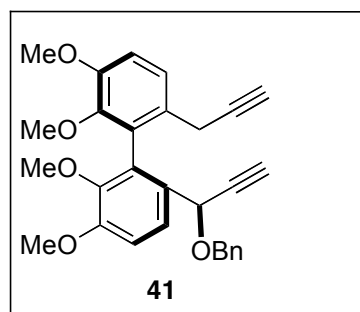

**Synthesis of compound 41:** To a solution of the substrate **40** (102 mg, 0.2 mmol) in DME (1 mL) at 0 °C was added benzyl bromide (0.1 mL, 0.8 mmol) followed by tetra-*n*-butylammonium iodide (2 mg). After stirring at 0 °C for 20 min, to the above solution was added NaH (50% in paraffin oil, 30 mg, 0.4 mmol). The reaction mixture was stirred at 0 °C for 30 min and quenched with saturated

aq. NH<sub>4</sub>Cl solution. The reaction mixture was diluted with diethyl ether and washed successively with water, brine and dried over Na<sub>2</sub>SO<sub>4</sub>. The organic layer was evaporated under reduced pressure to afford the crude product which was purified by column chromatography on silica gel using 10 % EtOAc/hexane as the eluent to get the benzyl ether **41** (80 mg, 0.17 mmol) in 88% yield as viscous oil. <sup>1</sup>H NMR (400 MHz, CDCl<sub>3</sub>) δ 7.63 (d, *J* = 8.0 Hz, 1 H), 7.40 (d, *J* = 8.0 Hz, 1 H), 7.23-7.13 (m, 5 H), 6.98 (d, *J* = 8.0 Hz, 1 H), 6.93 (d, *J* = 8.0 Hz, 1 H), 4.70 (d, *J* = 0.4 Hz, 1 H), 4.55 (d, *J* = 16.0 Hz, 1 H), 4.10 (d, *J* = 16.0 Hz, 1 H), 3.87 (s, 6 H), 3.60 (s, 6 H), 3.15-3.13 (m, 2 H), 2.58 (d, *J* = 0.4 Hz, 1 H), 2.07 (t, *J* = 0.4 Hz, 1 H).

#### Borostannylation of diyne **41**: Synthesis of compounds **42** and **43**

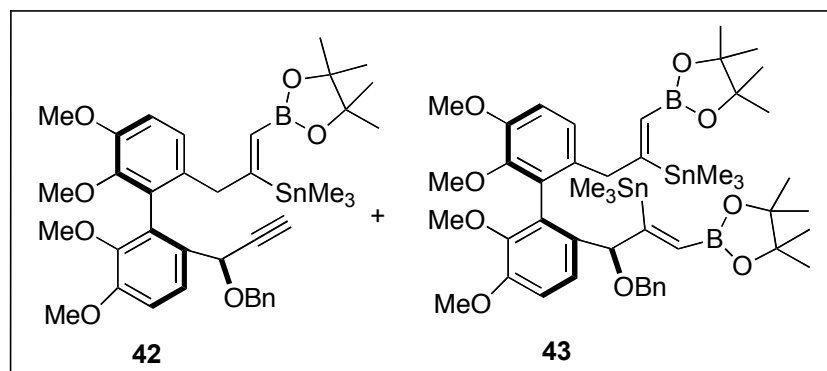

To a solution of 1,3-dimethyl-2-(trimethylstannyl)-2-bora-1,3-diazocyclopentane **3** (60 mg, 0.24 mmol) in benzene (1.5 mL) added PdCl<sub>2</sub>(PPh<sub>3</sub>)<sub>2</sub> (6 mg, 0.008 mmol) and the mixture was stirred at room

temperature for 10 min followed by addition of a solution of diyne **41** (91 mg, 0.2 mmol) in benzene (0.5 mL). After stirring the reaction mixture at room temperature for 6 h., a solution of pinacol (32 mg, 0.26 mmol) in benzene (0.3 mL) followed by *p*-toluenesulfonic acid (*p*-TSA, 54 mg, 0.26 mmol) were added to the reaction mixture. After 6 h, the reaction was quenched by the addition of Et<sub>3</sub>N (0.04 mL) and the solvent was evaporated under reduced pressure to afford the crude product, which was purified by silica gel chromatography using 10 % EtOAc/hexane as the eluent to yield compounds **42** (44 mg, 0.06 mmol) and **43** (20 mg, 0.02 mmol) as a viscous

oil. Compound **42**:  $^1\text{H}$  NMR (400 MHz,  $\text{CDCl}_3$ )  $\delta$  7.58 (d,  $J = 8.0$  Hz, 1 H), 7.21-7.16 (m, 5 H), 6.97 (d,  $J = 8.0$  Hz, 1 H), 6.83 (d,  $J = 8.0$  Hz, 1 H), 6.71 (d,  $J = 8.0$  Hz, 1 H), 5.89 (s, 1 H), 4.67 (d,  $J = 0.4$  Hz, 1 H), 4.59 (d,  $J = 16.0$  Hz, 1 H), 4.19 (d,  $J = 16.0$  Hz, 1 H), 3.86 (s, 3 H), 3.81 (s, 3 H), 3.61 (s, 3 H), 3.58 (s, 3 H), 3.35 (d,  $J = 18$  Hz, 1 H), 3.17 (d,  $J = 18.0$  Hz, 1 H), 2.51 (d,  $J = 0.4$  Hz, 1 H), 1.13 (s, 12 H), -0.02 (t,  $J = 32.0$  Hz, 9 H).

**Compound 43**:  $^1\text{H}$  NMR (400 MHz,  $\text{CDCl}_3$ )  $\delta$  7.22-7.14 (m, 5 H), 6.88 (d,  $J = 8.0$  Hz, 1 H), 6.79 (d,  $J = 8.0$  Hz, 1 H), 6.67 (d,  $J = 8.0$  Hz, 1 H), 5.91 (s, 1 H), 5.77 (s, 1 H), 4.70 (s, 1 H), 4.21 (d,  $J = 12.0$  Hz, 1 H), 4.02 (d,  $J = 12.0$  Hz, 1 H), 3.86 (s, 3 H), 3.79 (s, 3 H), 3.61 (s, 6 H), 3.48-3.14 (m, 2 H), 1.24-1.13 (m, 24 H), 0.08-0.01 (m, 18 H).

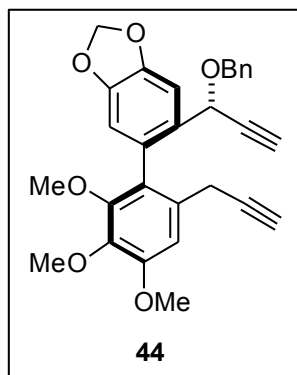

**Synthesis of compound 44:** To a solution of the alcohol **21A** (903 mg, 1.72 mmol) and BnBr (1.08 g, 6.88 mmol) in DME (10 mL) was added NaH (275 mg, 6.88 mmol, 60% w/w in paraffin oil) at 0°C. One drop of water was added to the above mixture. The mixture was stirred at 0°C for 3.5 h, then quenched with saturated aq.  $\text{NH}_4\text{Cl}$  solution. Ether extraction, drying with anhydrous  $\text{MgSO}_4$  and removal of the solvent under vacuum gave an oil, which was directly used without further

purification. The crude oil was dissolved in MeOH (100 mL) followed by the addition of solid  $\text{K}_2\text{CO}_3$  (950 mg, 6.88 mmol) at 0°C while stirring. Then the mixture was allowed to warm to room temperature and further stirring for 6h. The reaction was quenched with saturated aq.  $\text{NH}_4\text{Cl}$  solution. Ether extraction, drying with anhydrous  $\text{MgSO}_4$  and removal of the solvent under vacuum gave an oil. Purification by flash column (EtOAc: hexanes = 1: 15) gave the diyne **44** as a yellow solid (584 mg, 72% yield over two steps).  $^1\text{H}$  NMR (400 MHz,  $\text{CDCl}_3$ ):  $\delta$  7.32 (s, 1 H), 7.29-7.20 (m, 5 H), 6.99 (s, 1 H), 6.58 (s, 1 H), 6.02 (s, 2 H), 4.76 (d,  $J = 2$  Hz, 1 H), 4.58 (d,  $J = 11.6$  Hz, 1 H), 4.20 (d,  $J = 11.6$  Hz, 1 H), 3.93 (s, 3 H), 3.80 (s, 3 H), 3.59 (s, 3 H), 3.22 (dd,  $J = 4\text{Hz}, 2.8\text{Hz}, 2\text{H}$ ), 2.54 (d,  $J = 2$  Hz, 1 H), 2.14 (t,  $J = 2.8$  Hz, 1 H).;  $^{13}\text{C}$  NMR (100 MHz,  $\text{CDCl}_3$ ):  $\delta$  153.27, 150.93, 147.77, 147.55, 140.84, 137.62, 131.72, 130.86, 128.47, 128.23, 128.16, 128.05, 127.94, 127.55, 125.09, 109.92, 107.52, 107.35, 101.38, 82.30, 82.12, 75.04, 70.70, 70.57, 67.56, 60.86, 60.82, 55.97, 22.95.; IR (neat,  $\text{cm}^{-1}$ ): 3435, 3287, 2955, 1597, 1480, 1462, 1402, 1234, 1040, 749, 700.; HRMS (ESI)  $[\text{M}+\text{Na}^+]$  calcd for  $\text{C}_{29}\text{H}_{26}\text{O}_6\text{Na}$  493.1622, found 493.1589.

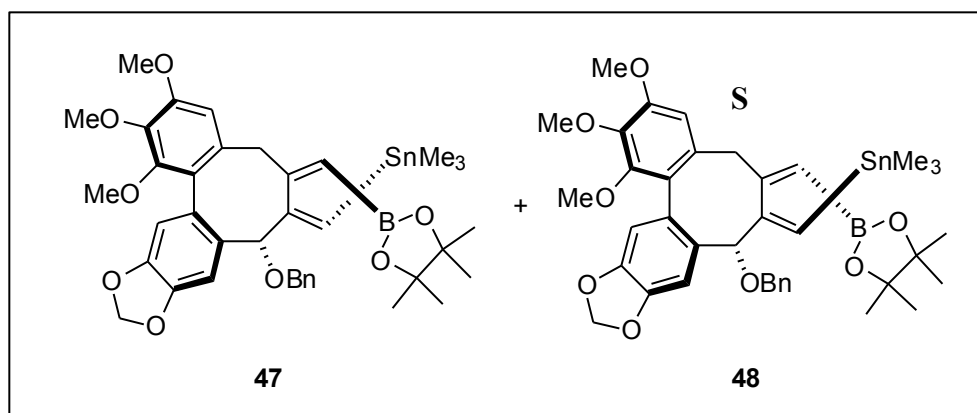

**Synthesis of compounds 47 and 48:** To a solution of diyne **44** (40 mg, 0.084 mmol) and  $\text{PdCl}_2(\text{PPh}_3)_2$  (3 mg, 0.002 mmol) in benzene (0.6 mL) was added 1,3-dimethyl-2-(trimethylstannyl)-2-bora-1,3-diazocyclopentane (26 mg, 0.1 mmol) in benzene (0.6 mL) and the mixture was stirred at room temperature for 18 h. Then pinacol (15 mg, 0.126 mmol) was added and the mixture was stirred after for 6 h. The solvent was evaporated under reduced pressure to afford the crude product, which was purified by flash column (EtOAc: hexanes = 1: 5) to yield compound **47** (34 mg, 55% yield) and compound **48** (14 mg, 23% yield) as light yellow waxy solids.

Compound **47**:  $^1\text{H}$  NMR (400 MHz,  $\text{C}_6\text{D}_6$ )  $\delta$  7.70 (s, 1H), 7.43 (d,  $J = 7.2$  Hz, 2H), 7.12 (d,  $J = 7.2$  Hz, 2H), 7.05 (t,  $J = 7.2$  Hz, 1H), 6.84 (s, 1H), 6.83 (s, 1H), 6.51 (s, 1H), 5.70 (s, 1H), 5.29 (d,  $J = 1.6$  Hz, 1H), 5.22 (d,  $J = 1.6$  Hz, 1H), 5.01 (d,  $J = 12$  Hz, 1H), 4.99 (s, 1H), 4.53 (d,  $J = 12$  Hz, 1H), 3.75 (s, 3H), 3.42 (s, 3H), 3.34 (s, 3H), 3.24 (d,  $J = 11.6$  Hz, 1H), 3.16 (d,  $J = 11.6$  Hz, 1H), 1.04 (s, 6H), 1.01 (s, 6H), 0.24 (s, 9H).  $^{13}\text{C}$  NMR (100 MHz,  $\text{C}_6\text{D}_6$ )  $\delta$  164.62, 160.87, 153.96, 151.60, 148.23, 146.39, 141.96, 139.50, 137.35, 135.73, 128.28, 127.80, 127.68, 127.25, 125.90, 123.94, 110.32, 107.90, 104.97, 100.79, 82.84, 79.76, 70.79, 60.47, 60.32, 55.26, 53.09, 45.99, 29.96, 24.92, 24.86, -7.70. IR (neat,  $\text{cm}^{-1}$ ): 2925, 1595, 1480, 1379, 1329, 1271, 1260, 1142, 764, 750. HRMS (ESI)  $[\text{M}+\text{Na}^+]$  calcd for  $\text{C}_{38}\text{H}_{47}\text{BSnO}_8\text{Na}$  785.2292, found 785.2291.

A sample, recrystallized from  $\text{CH}_2\text{Cl}_2$  and ethanol with slow vapor diffusion of hexane was analyzed by X-ray crystallography. Crystallographic Information File is attached to this Supporting Information.

Compound **48**:  $^1\text{H}$  NMR (400 MHz,  $\text{C}_6\text{D}_6$ )  $\delta$  7.52 (s, 1H), 7.37 (d,  $J = 7.2$  Hz, 2H), 7.12-7.10 (d,  $J = 7.2$  Hz, 2H), 7.06-7.04 (t,  $J = 7.2$  Hz, 1H), 6.97 (s, 1H), 6.51 (s, 1H), 6.47 (s, 1H),

6.15 (d,  $J = 0.8$  Hz, 1H), 5.40 (d,  $J = 1.2$  Hz, 1H), 5.36 (d,  $J = 1.2$  Hz, 1H), 5.31 (s, 1H), 4.73 (d,  $J = 12$  Hz, 1H), 4.62 (d,  $J = 12$  Hz, 1H), 3.86 (s, 3H), 3.63 (d,  $J = 13.2$  Hz, 1H), 3.51 (s, 3H), 3.49 (d,  $J = 13.2$  Hz, 1H), 3.41 (s, 3H), 1.04 (s, 6H), 1.03 (s, 6H), 0.35 (s, 9H).  $^{13}\text{C}$  NMR (100 MHz,  $\text{C}_6\text{D}_6$ )  $\delta$  176.34, 174.86, 153.32, 151.38, 147.58, 146.51, 141.45, 139.46, 134.87, 133.79, 130.67, 128.18, 127.92, 127.68, 127.65, 127.09, 126.75, 110.56, 109.98, 107.93, 100.77, 85.89, 83.07, 82.97, 71.19, 60.65, 60.55, 55.34, 47.90, 29.96, 24.80, 24.68, -5.74. IR (neat,  $\text{cm}^{-1}$ ): 2976, 2924, 2853, 1593, 1477, 1351, 1274, 1260, 1143, 1040, 764, 750. HRMS (ESI)  $[\text{M}+\text{Na}^+]$  calcd for  $\text{C}_{38}\text{H}_{47}\text{BSnO}_8\text{Na}$  785.2292, found 785.2309.

**Synthesis of compound 49:** To a mixture of cyclized boronesters **47** and **48** (50 mg, 0.068

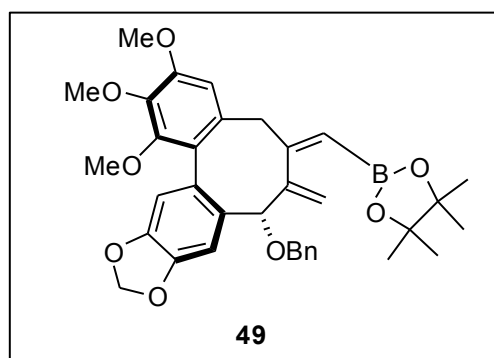

mmol) in  $\text{CH}_2\text{Cl}_2$  was added p-TsOH (26 mg, 0.137 mmol) and the mixture was stirred for 2 h. The reaction was quenched with  $\text{Et}_3\text{N}$  (14 mg, 0.137 mmol). Ether extraction, drying with anhydrous  $\text{MgSO}_4$  and removal of the solvent under vacuum gave an oil. Purification by flash column (EtOAc: hexanes = 1: 5) gave the diene **49** as a yellow solid (33 mg, 81% yield).  $^1\text{H}$  NMR (400

MHz,  $\text{C}_6\text{D}_6$ ):  $\delta$  7.62 (s, 1 H), 7.13-7.09 (m, 3 H), 7.05 (t,  $J = 7.2$  Hz, 1 H), 6.90 (s, 1 H), 6.50 (s, 1 H), 5.78 (s, 1 H), 5.66 (s, 1 H), 5.39 (d,  $J = 2$  Hz, 1 H), 5.33 (d,  $J = 1.2$  Hz, 2 H), 4.89 (s, 1 H), 4.65 (d,  $J = 12$  Hz, 1 H), 4.44 (d,  $J = 12$  Hz, 1 H), 4.31 (s, 1 H), 3.81 (s, 3 H), 3.42 (s, 3 H), 3.27 (s, 3 H), 3.16 (s, 2 H), 1.06 (s, 12 H).;  $^{13}\text{C}$  NMR (100 MHz,  $\text{C}_6\text{D}_6$ ):  $\delta$  159.32, 153.15, 150.69, 150.60, 147.64, 146.05, 140.99, 138.80, 135.59, 135.01, 128.57, 128.12, 127.34, 127.26, 127.18, 125.48, 111.58, 109.46, 108.03, 105.12, 101.02, 83.08, 70.04, 61.09, 60.67, 56.05, 44.55, 29.70, 24.92, 24.54. IR (neat,  $\text{cm}^{-1}$ ): 2922, 1612, 1478, 1406, 1328, 1260, 1235, 1195, 1039, 750.; HRMS (ESI)  $[\text{M}+\text{Na}^+]$  calcd for  $\text{C}_{35}\text{H}_{39}\text{BO}_8\text{Na}$  621.2636, found 621.2634.

Since both **47** and **48** gave the same product upon destannylation, these compounds were assigned the atropisomeric structures indicated.

X-ray crystallographic analysis of a sample of **49** recrystallized from  $\text{CH}_2\text{Cl}_2$  (slow vapor diffusion of hexane) confirmed the relative configuration of the chiral centers. Crystallographic Information File is attached to this Supporting Information.

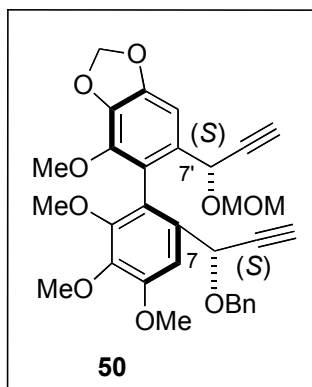

**Synthesis of compound 50:** To a solution of the compound **29** (117 mg, 0.2 mmol) in DME (2mL) at 0 °C was added methoxymethylchloride (0.2 mL). After stirring at 0 °C for 20 min, to the above solution was added NaH (50% in paraffin oil, 37 mg, 0.5 mmol). The reaction mixture was stirred at 0 °C for 1 h and quenched with saturated aq. NH<sub>4</sub>Cl solution. The reaction mixture was diluted with diethyl ether and washed successively with water, brine and dried over Na<sub>2</sub>SO<sub>4</sub>. The organic layer was evaporated under reduced

pressure to afford the crude product which was purified by column chromatography on silica gel using 10 % EtOAc/hexane as the eluent to get the compound **50** (100 mg, 0.18 mmol) in 90 % yield as a viscous oil.  $[\alpha]_D - 26.2$  (*c* 1, CHCl<sub>3</sub>).; <sup>1</sup>H NMR (500 MHz, CDCl<sub>3</sub>): δ 7.22-7.16 (m, 6 H), 6.92 (s, 1 H), 5.97 (d, *J* = 1.6 Hz, 1 H), 5.94 (d, *J* = 1.6 Hz, 1 H), 4.85 (d, *J* = 2.0 Hz, 1 H), 4.83 (d, *J* = 2.0 Hz, 1H), 4.71 (d, *J* = 6.8 Hz, 1 H), 4.55 (d, *J* = 11.2 Hz, 1 H), 4.39 (d, *J* = 6.8 Hz, 1 H), 4.27 (d, *J* = 11.2 Hz, 1 H), 3.92 (s, 3 H), 3.83 (s, 3 H), 3.72 (s, 3 H), 3.69 (s, 3 H), 3.16 (s, 3 H), 2.60 (d, *J* = 2.0 Hz, 1 H), 2.50 (d, *J* = 2.0 Hz, 1H).; <sup>13</sup>C NMR (100 MHz, CDCl<sub>3</sub>): δ 153.66, 151.86, 149.56, 142.44, 141.22, 137.55, 136.34, 133.03, 131.95, 128.63, 128.33, 127.76, 122.03, 120.95, 107.33, 102.17, 101.32, 94.27, 82.11, 82.07, 77.43, 76.26, 75.57, 70.92, 68.31, 64.82, 60.79, 60.77, 59.38, 56.13, 55.91.; MS (ESI): *m/z*: 583.1866 [M+Na]<sup>+</sup>.

#### [BSn]-mediated Cyclization of diyne **50**: Synthesis of compounds **51** and **52**:

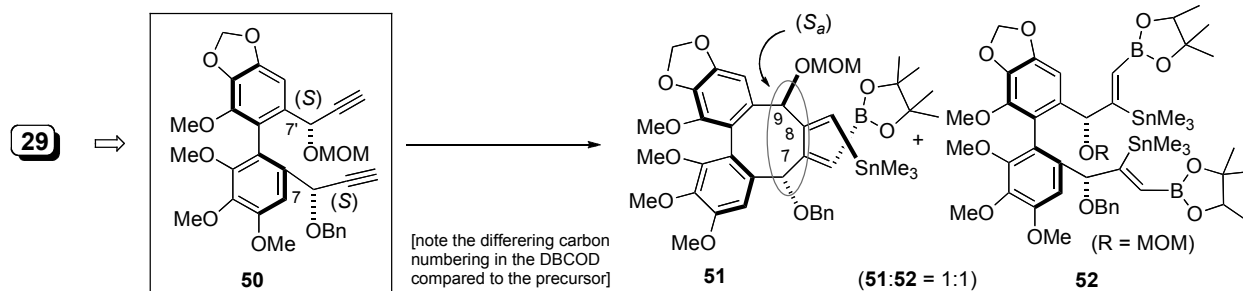

To a solution of 1,3-dimethyl-2-(trimethylstannyl)-2-bora-1,3-diazocyclopentane **3** (32 mg, 0.12 mmol) in benzene (0.8 mL) added PdCl<sub>2</sub>(PPh<sub>3</sub>)<sub>2</sub> (1 mg) and the mixture was stirred at room temperature for 10 min and was followed by addition of a solution of diyne **50** (26 mg, 0.05 mmol) in benzene (0.3 mL). After stirring the reaction mixture at rt for 12 h, a solution of pinacol (16 mg, 0.12 mmol) in benzene (0.2 mL) followed by *p*-TSA (24 mg, 0.12 mmol) was



added. After 2 h, the reaction was quenched by the addition of Et<sub>3</sub>N (0.02 mL) and the solvent was evaporated under reduced pressure to afford the crude product, which was purified by silica gel chromatography using 10 % EtOAc/hexane as the eluent to yield compound **51** (14 mg, 0.017 mmol) and compound **52** (20 mg, 0.017 mmol) in 70 % combined yield.

**Compound 51:** [ $\alpha$ ]<sub>D</sub> – 62.5 (*c* 0.8, CHCl<sub>3</sub>).; <sup>1</sup>H NMR (500 MHz, CDCl<sub>3</sub>):  $\delta$  7.26-7.22 (m, 5 H), 6.95 (s, 1 H), 6.88 (s, 1 H), 6.37 (t, *J* = 35 Hz, 1H), 5.98 (d, *J* = 1.0 Hz, 1 H), 5.97 (d, *J* = 1.0 Hz, 1 H), 5.91 (s, 1 H), 4.97 (d, *J* = 6.5 Hz, 1H), 4.60 (s, 1 H), 4.61 (d, *J* = 6.5 Hz, 1 H), 4.32 (d, *J* = 11.0 Hz, 1 H), 4.24 (s, 1 H), 4.2 (d, *J* = 11.0 Hz, 1 H), 3.93 (s, 3 H), 3.83 (s, 3 H), 3.82 (s, 3 H), 3.51 (s, 3 H), 3.15 (s, 3 H), 1.16 (s, 6 H), 1.16 (s, 6 H), 0.05 (t, *J* = 22 Hz, 9 H).; <sup>13</sup>C NMR (125 MHz, CDCl<sub>3</sub>):  $\delta$  164.63, 158.45, 154.32, 151.28, 149.89, 141.33, 140.31, 138.43, 137.84, 137.09, 135.83, 128.33, 128.03, 127.85, 127.53, 127.17, 120.93, 118.87, 103.18, 101.26, 99.27, 94.01, 83.17, 80.00, 74.98, 70.58, 61.27, 60.69, 59.92, 56.17, 55.43, 53.62, 31.13, 29.22, 29.58, 25.36, 24.99, 22.91, 14.32, 1.23.; MS (ESI): *m/z*: 875.2716 [M+Na]<sup>+</sup>.

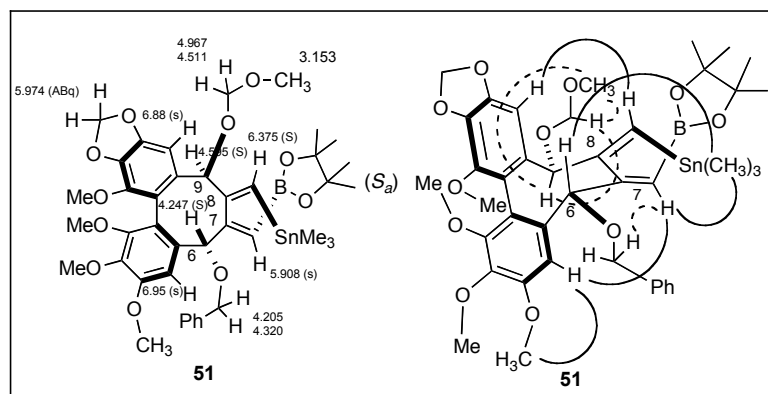

**Chemical shifts and nOe's observed for 51 (assignments were done by COSY, after identifying the CH(Sn) proton at  $\delta$  6.375 which shows coupling to Sn)**

**Compound 52:** <sup>1</sup>H NMR (500 MHz, C<sub>6</sub>D<sub>6</sub>):  $\delta$  7.27 (d, *J* = 7.5 Hz, 2 H), 7.16-7.04 (m, 4 H), 6.87 (s, 1 H), 6.67 (d, *J* = 85 Hz, 1 H), 6.63 (d, *J* = 85 Hz, 1 H), 5.25-5.18 (m, 4 H), 4.60 (d, *J* = 6.0 Hz, 1 H), 4.50 (d, *J* = 6.0 Hz, 1 H), 4.44 (d, *J* = 11.0 Hz, 1 H), 4.07 (d, *J* = 11.0 Hz, 1 H), 3.89 (s, 6 H), 3.70 (s, 3 H), 3.48 (s, 3 H), 3.16 (s, 3 H), 1.13-1.06 (m, 24 H), 0.53-0.39 (m, 18 H).; MS (ESI): *m/z*: 1163.3460 [M+Na]<sup>+</sup>.



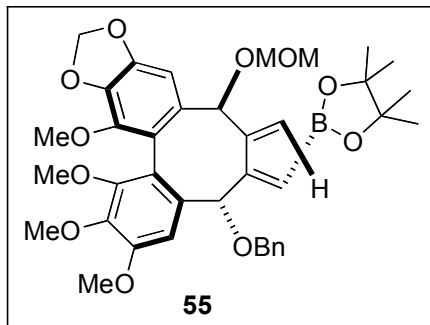

**Synthesis of compound 55:** Compound **55** was prepared from the compound **51** in 90% isolated yield following the procedure described for the sythesis of the compound **38**.

$[\alpha]_D - 33.20$  (*c* 0.25,  $\text{CHCl}_3$ ).;  $^1\text{H}$  NMR (400 MHz,  $\text{CDCl}_3$ ):  $\delta$  7.30-7.18 (m, aromatic), 6.92 (s, 1 H), 6.85 (s, 1 H), 5.97 (d,  $J=1.5$  Hz, 1 H), 5.93 (d,  $J=1.5$  Hz, 1 H), 5.91 (d,  $J=0.5$  Hz,

1 H), 5.42 (s, 1 H), 5.08 (d,  $J = 2.0$  Hz, 1 H), 4.80 (d,  $J = 6.5$  Hz, 1 H), 4.65 (s, 1 H), 4.48 (d,  $J = 6.5$  Hz, 1 H), 4.32 (s, 1 H), 4.31 (d,  $J = 11.0$  Hz, 1 H), 4.27 (d,  $J = 11.0$  Hz, 1 H), 3.90 (s, 3 H), 3.86 (s, 3 H), 3.77 (s, 3 H), 3.56 (s, 3 H), 0.85 (s, 6 H), 0.84 (s, 6 H).;  $^{13}\text{C}$  NMR (125 MHz,  $\text{CDCl}_3$ )  $\delta$  160.26, 154.33, 151.12, 150.20, 149.91, 141.37, 138.53, 136.55, 136.11, 128.33, 127.78, 127.50, 120.58, 119.69, 113.21, 103.87, 101.35, 99.69, 93.89, 83.22, 78.66, 73.15, 70.52, 61.23, 60.83, 59.92, 56.10, 55.43, 53.64, 29.94, 25.14, 24.84, 24.74, 14.35.; MS (ESI)  $m/z$ : 711.2550  $[\text{M}+\text{Na}]^+$ .

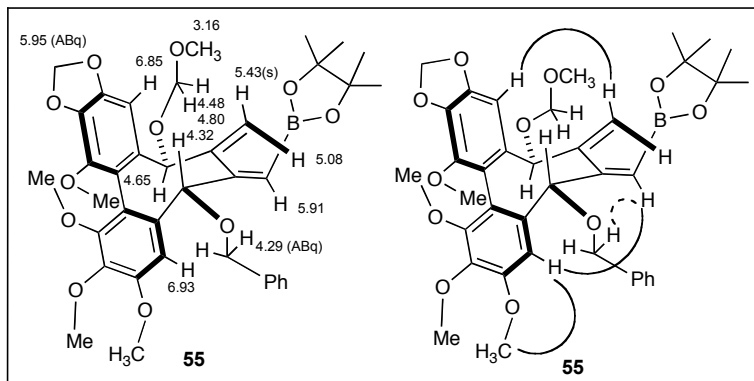

### Chemical shifts and nOe's observed for 55

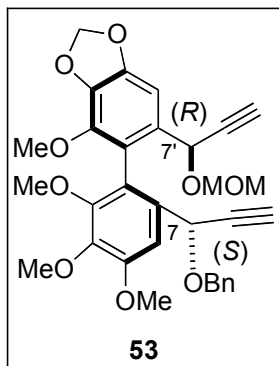

**Synthesis of compound 53:** Compound **53** was prepared from the compound **30** in 90 % yield following the procedure described for the

synthesis of **50**:  $[\alpha]_D +11.6$  ( $c$  0.6,  $\text{CHCl}_3$ ).;  $^1\text{H}$  NMR (500 MHz,  $\text{CDCl}_3$ )  $\delta$  7.25-7.18 (m, 6 H), 6.98 (s, 1 H), 5.95 (s, 2 H), 4.91 (d,  $J = 2.0$  Hz, 1 H), 4.81 (d,  $J = 6.5$  Hz, 1 H), 4.79 (d,  $J = 2.5$  Hz, 1 H), 4.58 (d,  $J = 11.5$  Hz, 1 H), 4.42 (d,  $J = 6.5$  Hz, 1 H), 4.20 (d,  $J = 11.5$  Hz, 1 H), 3.91 (s, 3 H), 3.85 (s, 3 H), 3.68 (s, 3 H), 3.21 (s, 3 H), 2.59 (d,  $J = 2.0$  Hz, 1 H),

2.49 (d,  $J = 2.5$  Hz, 1H).  $^{13}\text{C}$  NMR (125 MHz,  $\text{CDCl}_3$ ):  $\delta$  153.51, 152.05, 149.45, 142.6, 141.65,

137.70, 136.42, 132.65, 131.57, 128.64, 128.32, 127.73, 122.32, 12.84, 107.75, 102.14, 101.34, 95.28, 82.28, 81.83, 76.07, 75.53, 71.20, 68.59, 66.0, 61.03, 60.87, 59.43, 56.36, 56.20, 53.64, 29.92, 14.34.; MS (ESI):  $m/z$ : 583.1866  $[M+Na]^+$ .

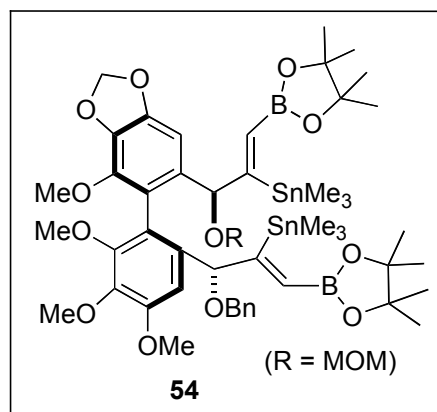

#### Attempted [BSn]-Mediated Cyclization of **53**, Adduct **54**.

Compound **54** was prepared from the diyne compound **53** in 85% yield following the procedure described for the synthesis of **52**:  $^1\text{H}$  NMR (500 MHz,  $\text{C}_6\text{D}_6$ ):  $\delta$  7.33 (d,  $J$  = 7.5 Hz, 2 H), 7.28 (s, 1 H), 7.16-7.05 (m, 3 H), 6.93 (s, 1 H), 6.71 (d,  $J$  = 85 Hz, 1 H), 6.10 (d,  $J$  = 85 Hz, 1 H), 5.31 (s, 1 H), 5.26 (s, 1 H), 5.22 (s, 2 H), 4.71 (d,  $J$  = 6.0 Hz, 1 H), 4.66 (d,  $J$  = 6.0 Hz, 1 H), 4.49 (d,  $J$  = 11.0 Hz, 1 H), 4.32 (d,

$J$  = 11.0 Hz, 1 H), 3.91 (s, 3 H), 3.84 (s, 3 H), 3.74 (s, 3 H), 3.34 (s, 3 H), 3.25 (s, 3 H), 1.08 (s, 6 H), 1.07 (s, 6 H), 0.98 (s, 12 H), 0.49-0.29 (m, 18 H); MS (ESI):  $m/z$ : 1165.2950  $[M+Na]^+$ .

No trace of cyclization product(s) were detected under these conditions.

#### References

- (1) Singidi, R. R.; RajanBabu, T. V. *Org. Lett.* **2008**, *10*, 3351.
- (2) Singidi, R. R.; Kutney, A. M.; RajanBabu, T. V. *J. Am. Chem. Soc.* **2010**, *132*, 13078.
- (3) Meyers, A. I.; Nelson, T. D.; Moorlag, H.; Rawson D. J.; Meiere, A. *Tetrahedron* **2004**, *60*, 4459.
- (4) Meyers, A. I.; Flisak, J. R.; Aitken, R. A. *J. Am. Chem. Soc.* **1987**, *109*, 5446.

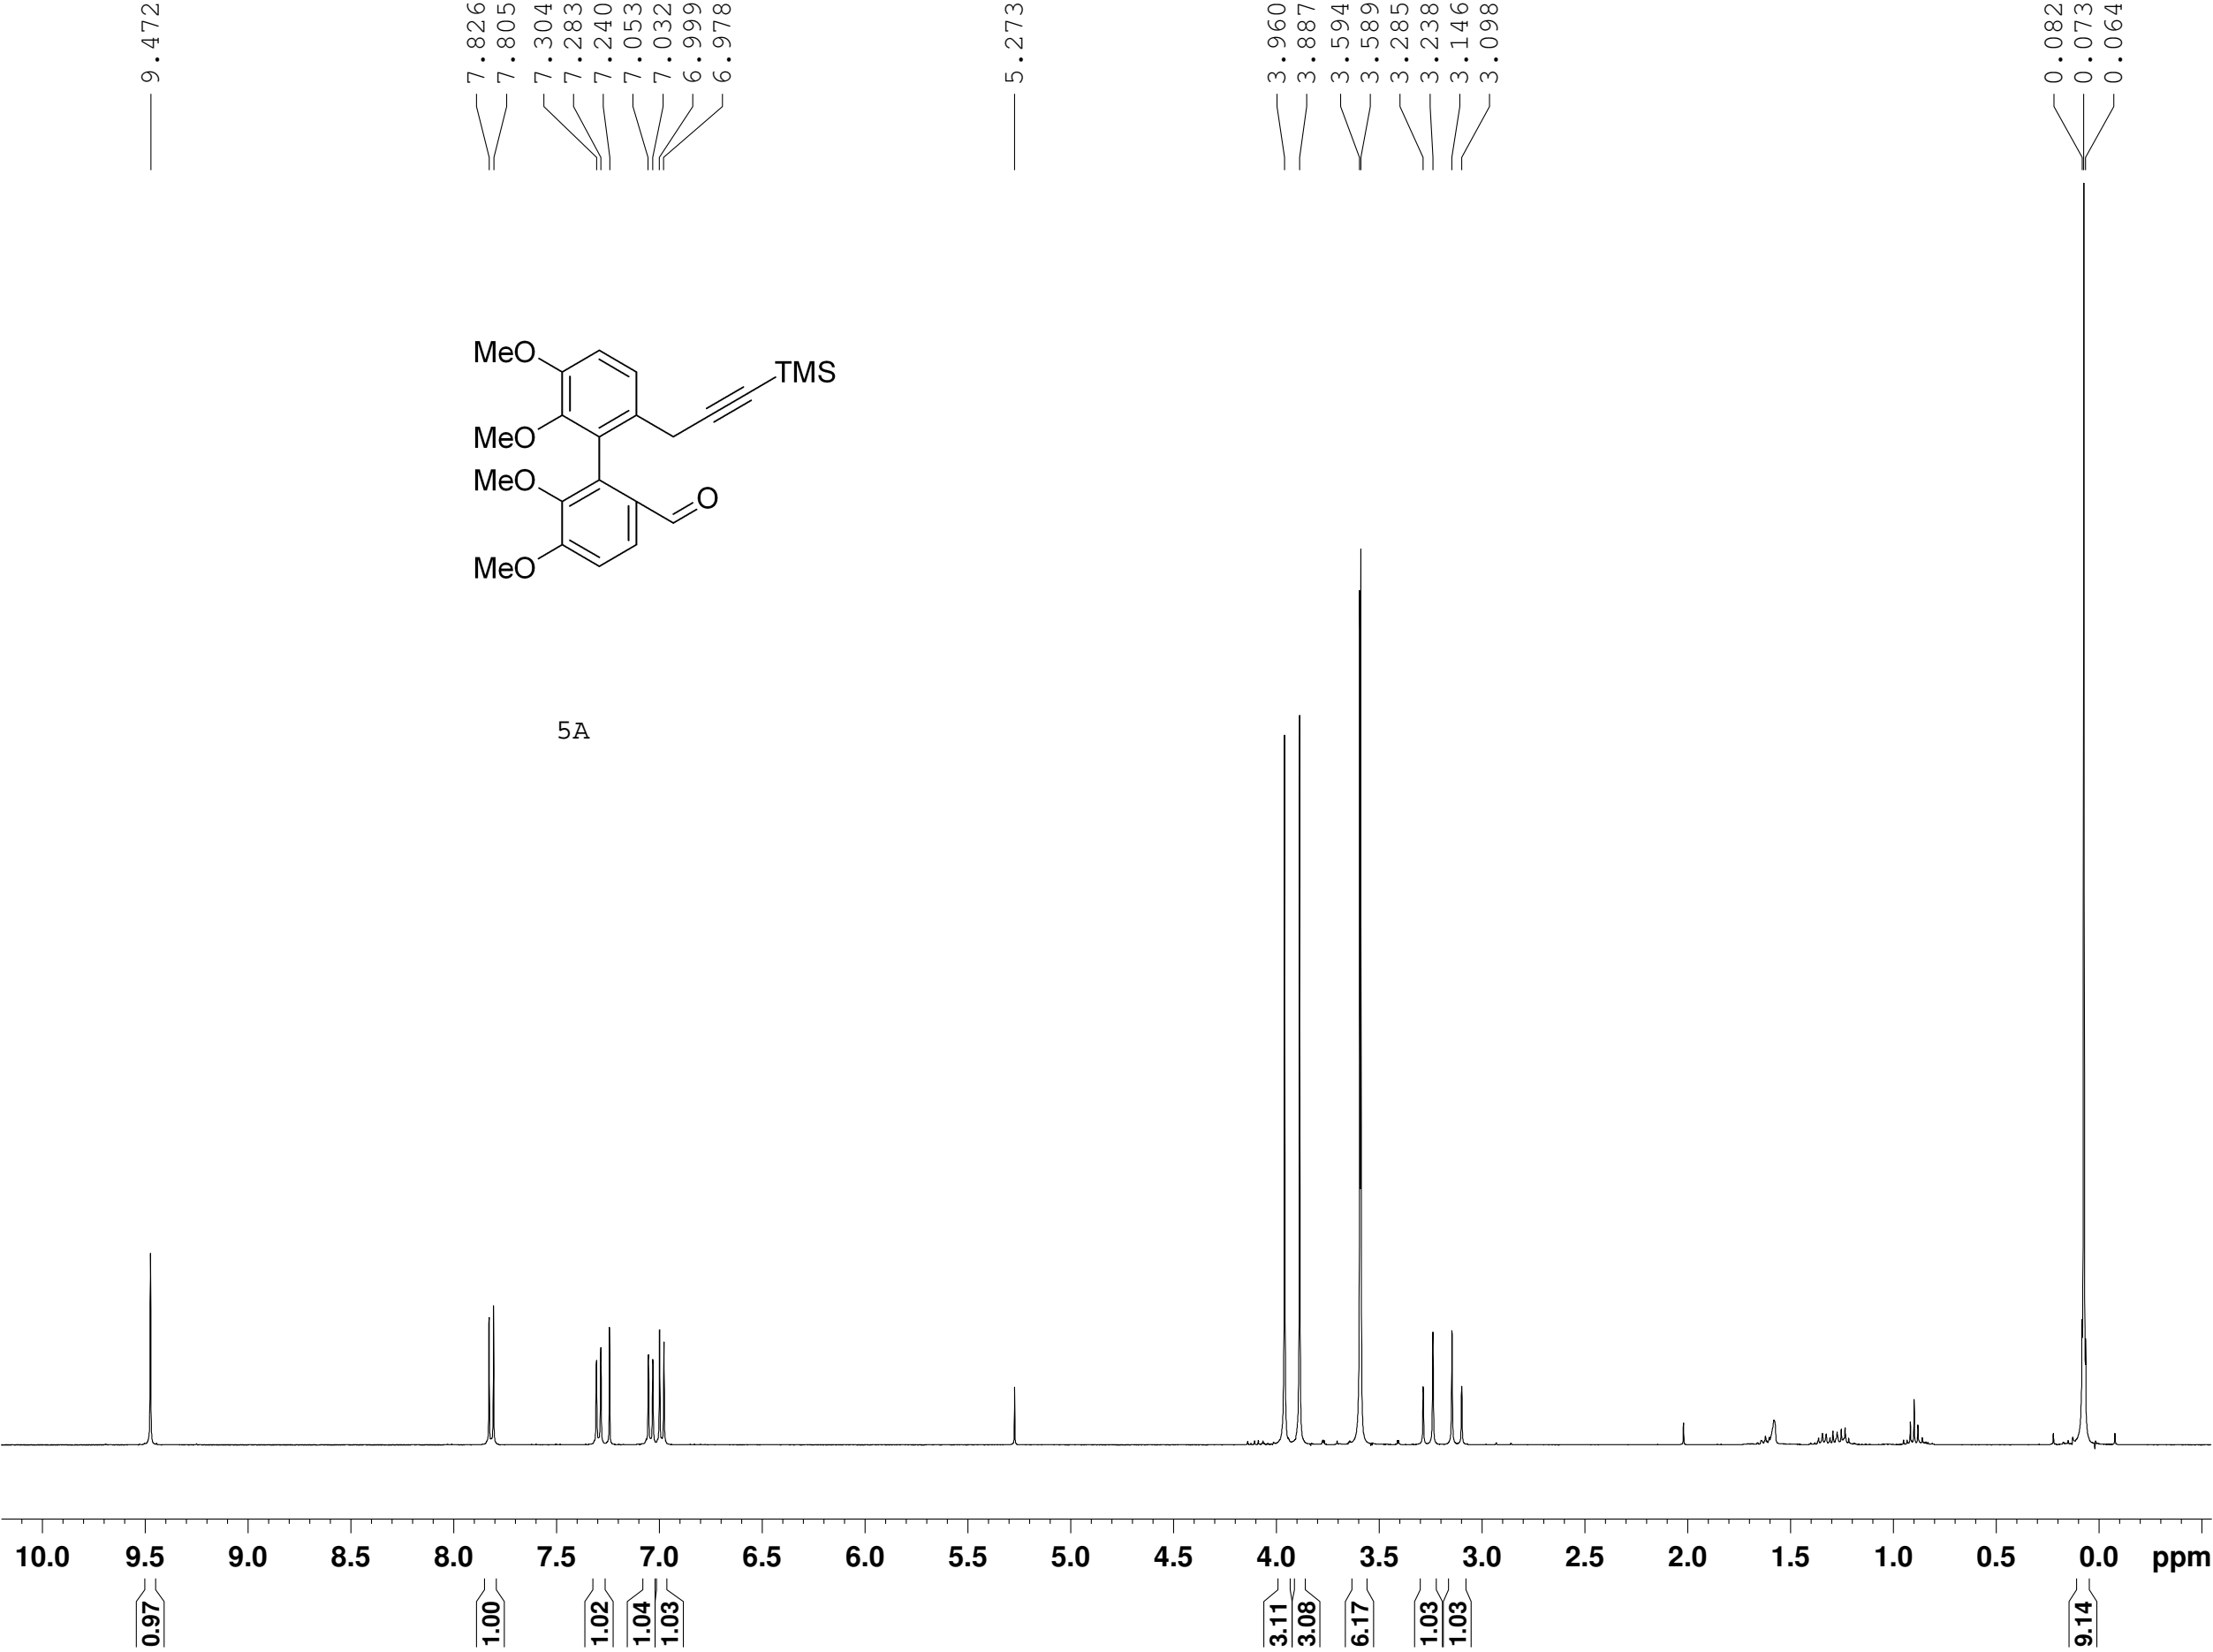

The Ohio State University  
Department of Chemistry  
NMR Facility  
400MHz – 0083

Current Data Parameters

NAME Rs-1-271  
EXPNO 1  
PROCNO 1

F2 - Acquisition Parameters

Date\_ 20071012  
Time 20.08  
INSTRUM spect  
PROBHD 5 mm QNP 1H/13  
PULPROG zg30  
TD 65536  
SOLVENT CDCl3  
NS 16  
DS 2  
SWH 8278.146 Hz  
FIDRES 0.126314 Hz  
AQ 3.9584243 sec  
RG 128  
DW 60.400 use  
DE 6.00 use  
TE 0.0 K  
D1 1.00000000 sec  
MCREST 0.00000000 sec  
MCWRK 0.01500000 sec

===== CHANNEL f1 =====

NUC1 1H  
P1 13.00 use  
PL1 0.00 dB  
SFO1 400.1324710 MHz

F2 - Processing parameters

SI 32768  
SF 400.1300179 MHz  
WDW EM  
SSB 0  
LB 0.30 Hz  
GB 0  
PC 1.00

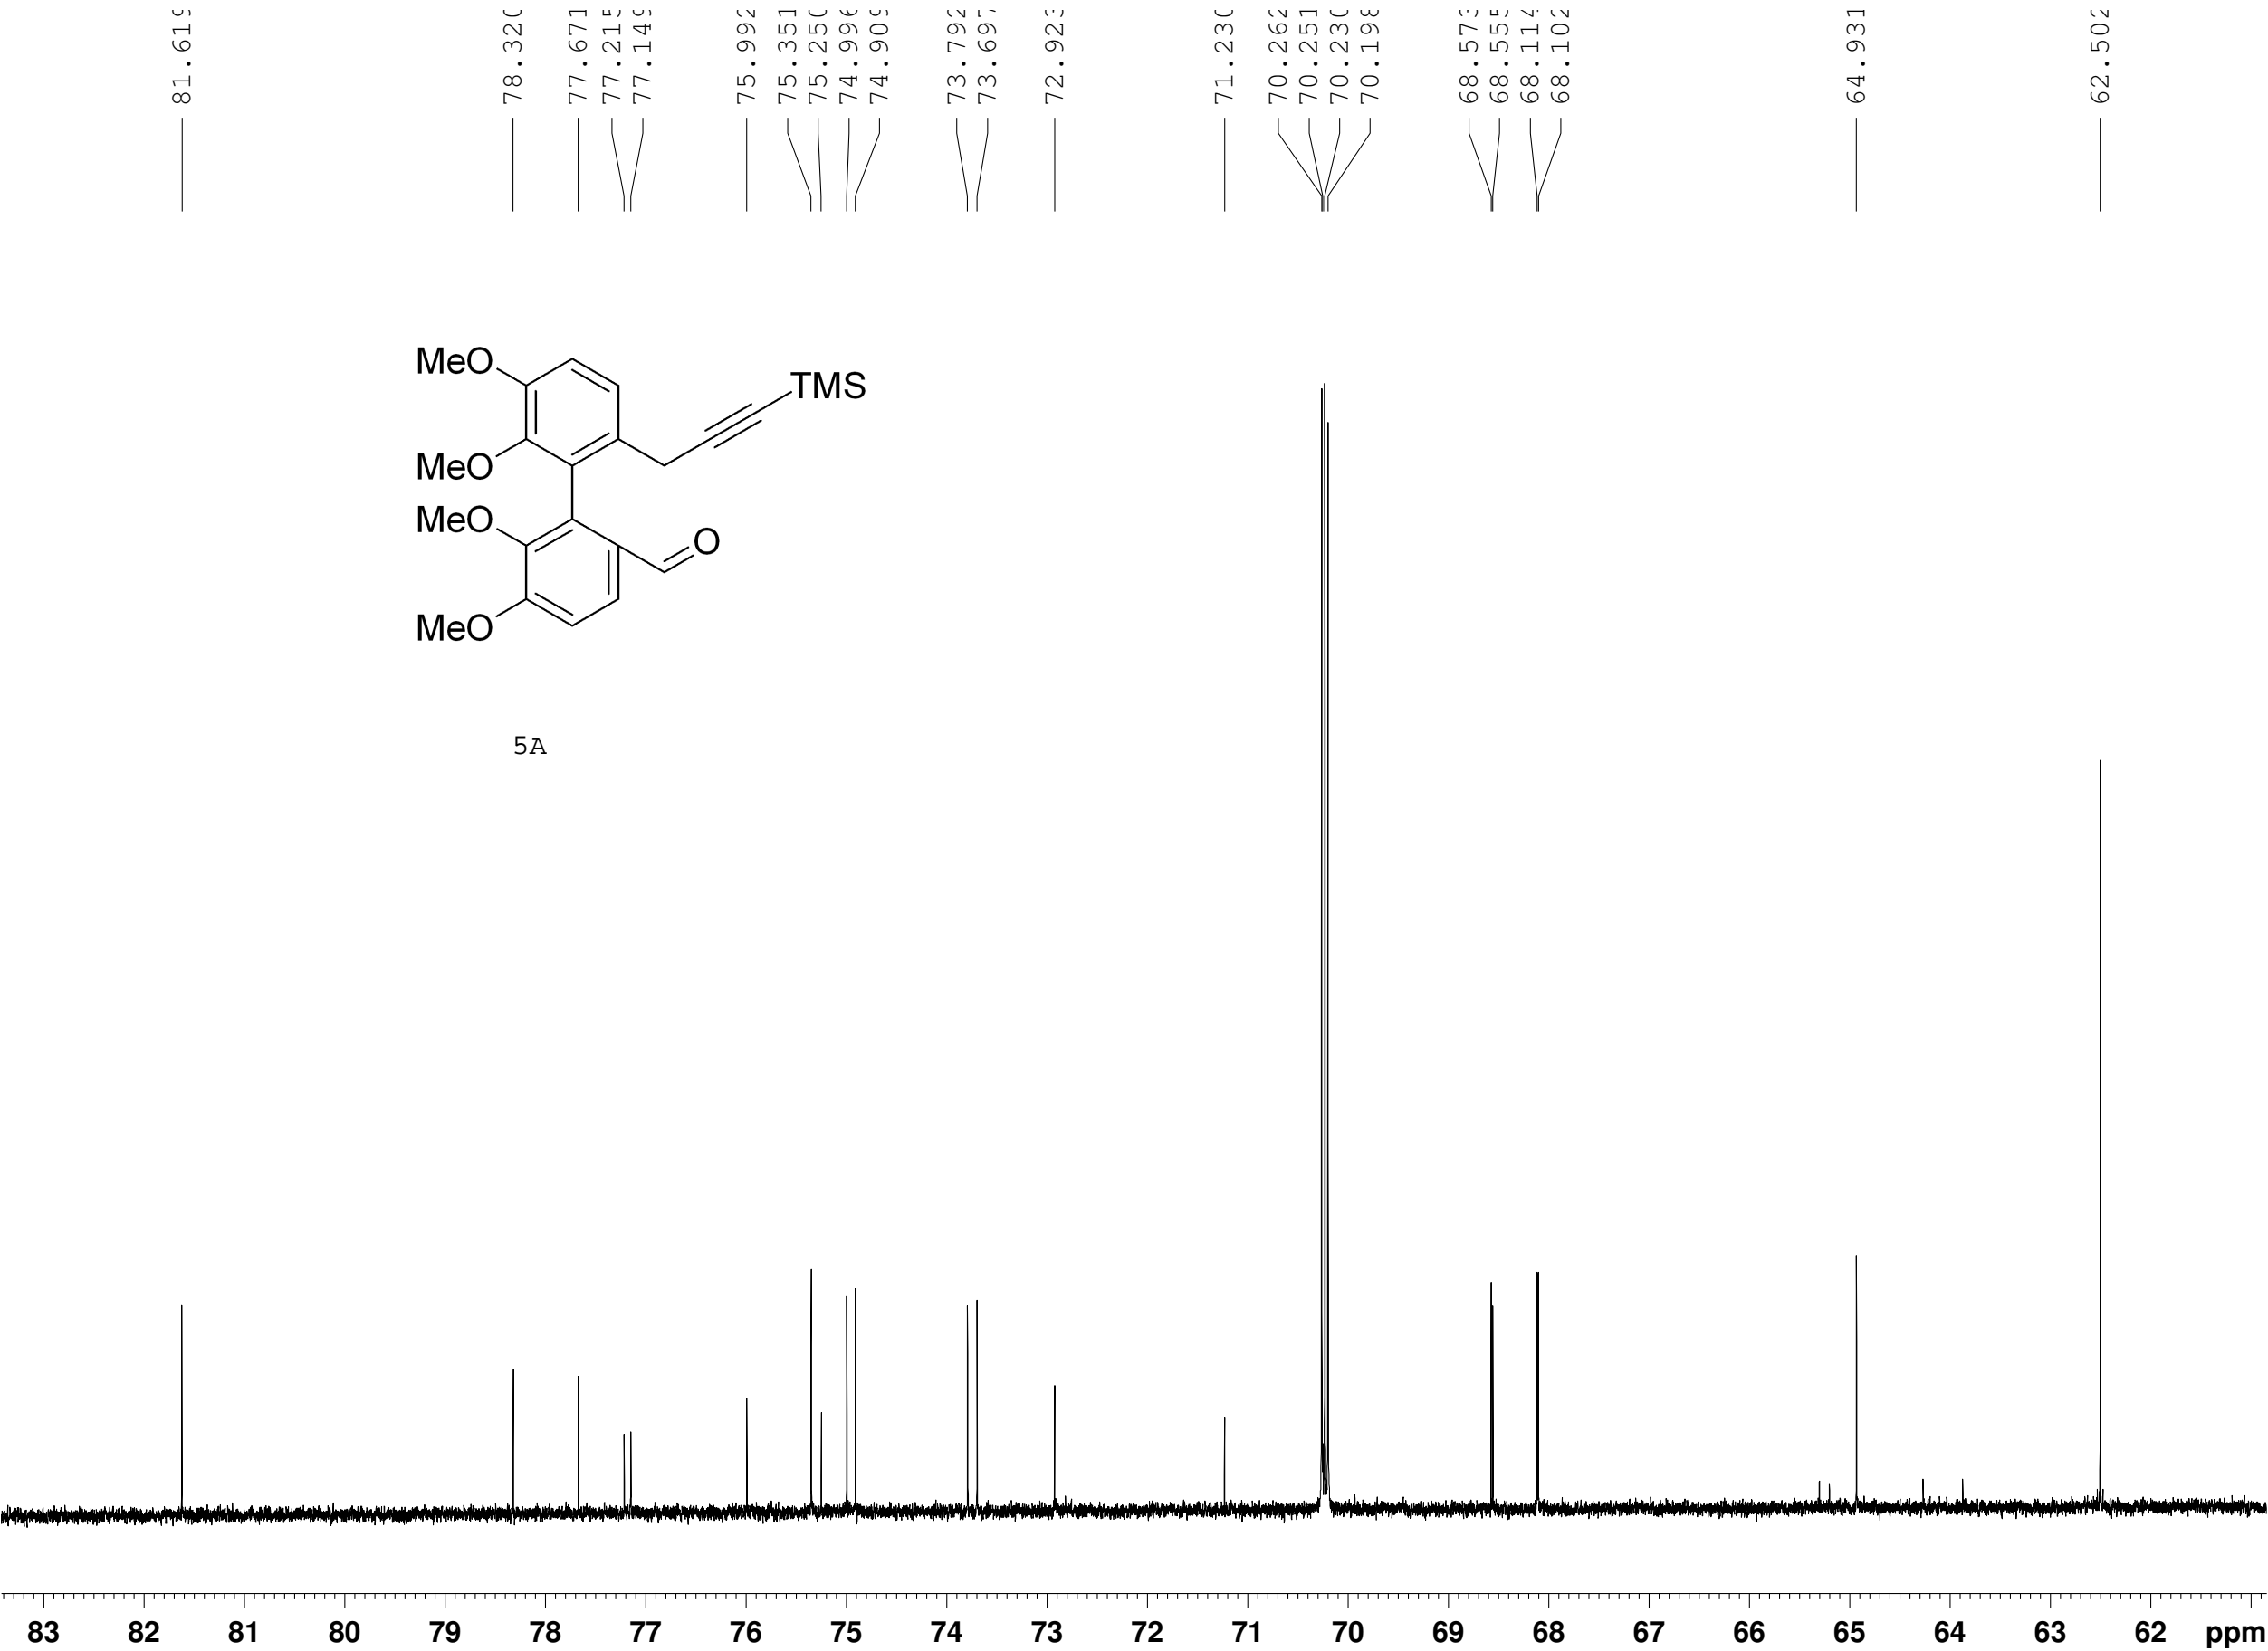

The Ohio State University  
Department of Chemistry  
NMR Facility  
400MHz – 0083

Current Data Parameters  
NAME Rs-1-271-C  
EXPNO 1  
PROCNO 1

F2 - Acquisition Parameters  
Date\_ 20071012  
Time 20.55  
INSTRUM spect  
PROBHD 5 mm QNP 1H/13  
PULPROG zgpg30  
TD 65536  
SOLVENT CDCl3  
NS 755  
DS 4  
SWH 23980.814 Hz  
FIDRES 0.365918 Hz  
AQ 1.3664756 sec  
RG 2048  
DW 20.850 use  
DE 6.00 use  
TE 0.0 K  
D1 2.00000000 sec  
d11 0.03000000 sec  
DELTA 1.89999998 sec  
MCREST 0.00000000 sec  
MCWRK 0.01500000 sec

===== CHANNEL f1 =====  
NUC1 13C  
P1 10.50 use  
PL1 0.00 dB  
SFO1 100.6228298 MHz

===== CHANNEL f2 =====  
CPDPRG2 waltz16  
NUC2 1H  
PCPD2 80.00 use  
PL2 -6.00 dB  
PL12 14.56 dB  
PL13 16.50 dB  
SFO2 400.1316005 MHz

F2 - Processing parameters  
SI 32768  
SF 100.6155318 MHz  
WDW EM  
SSB 0  
LB 1.00 Hz  
GB 0  
PC 1.00

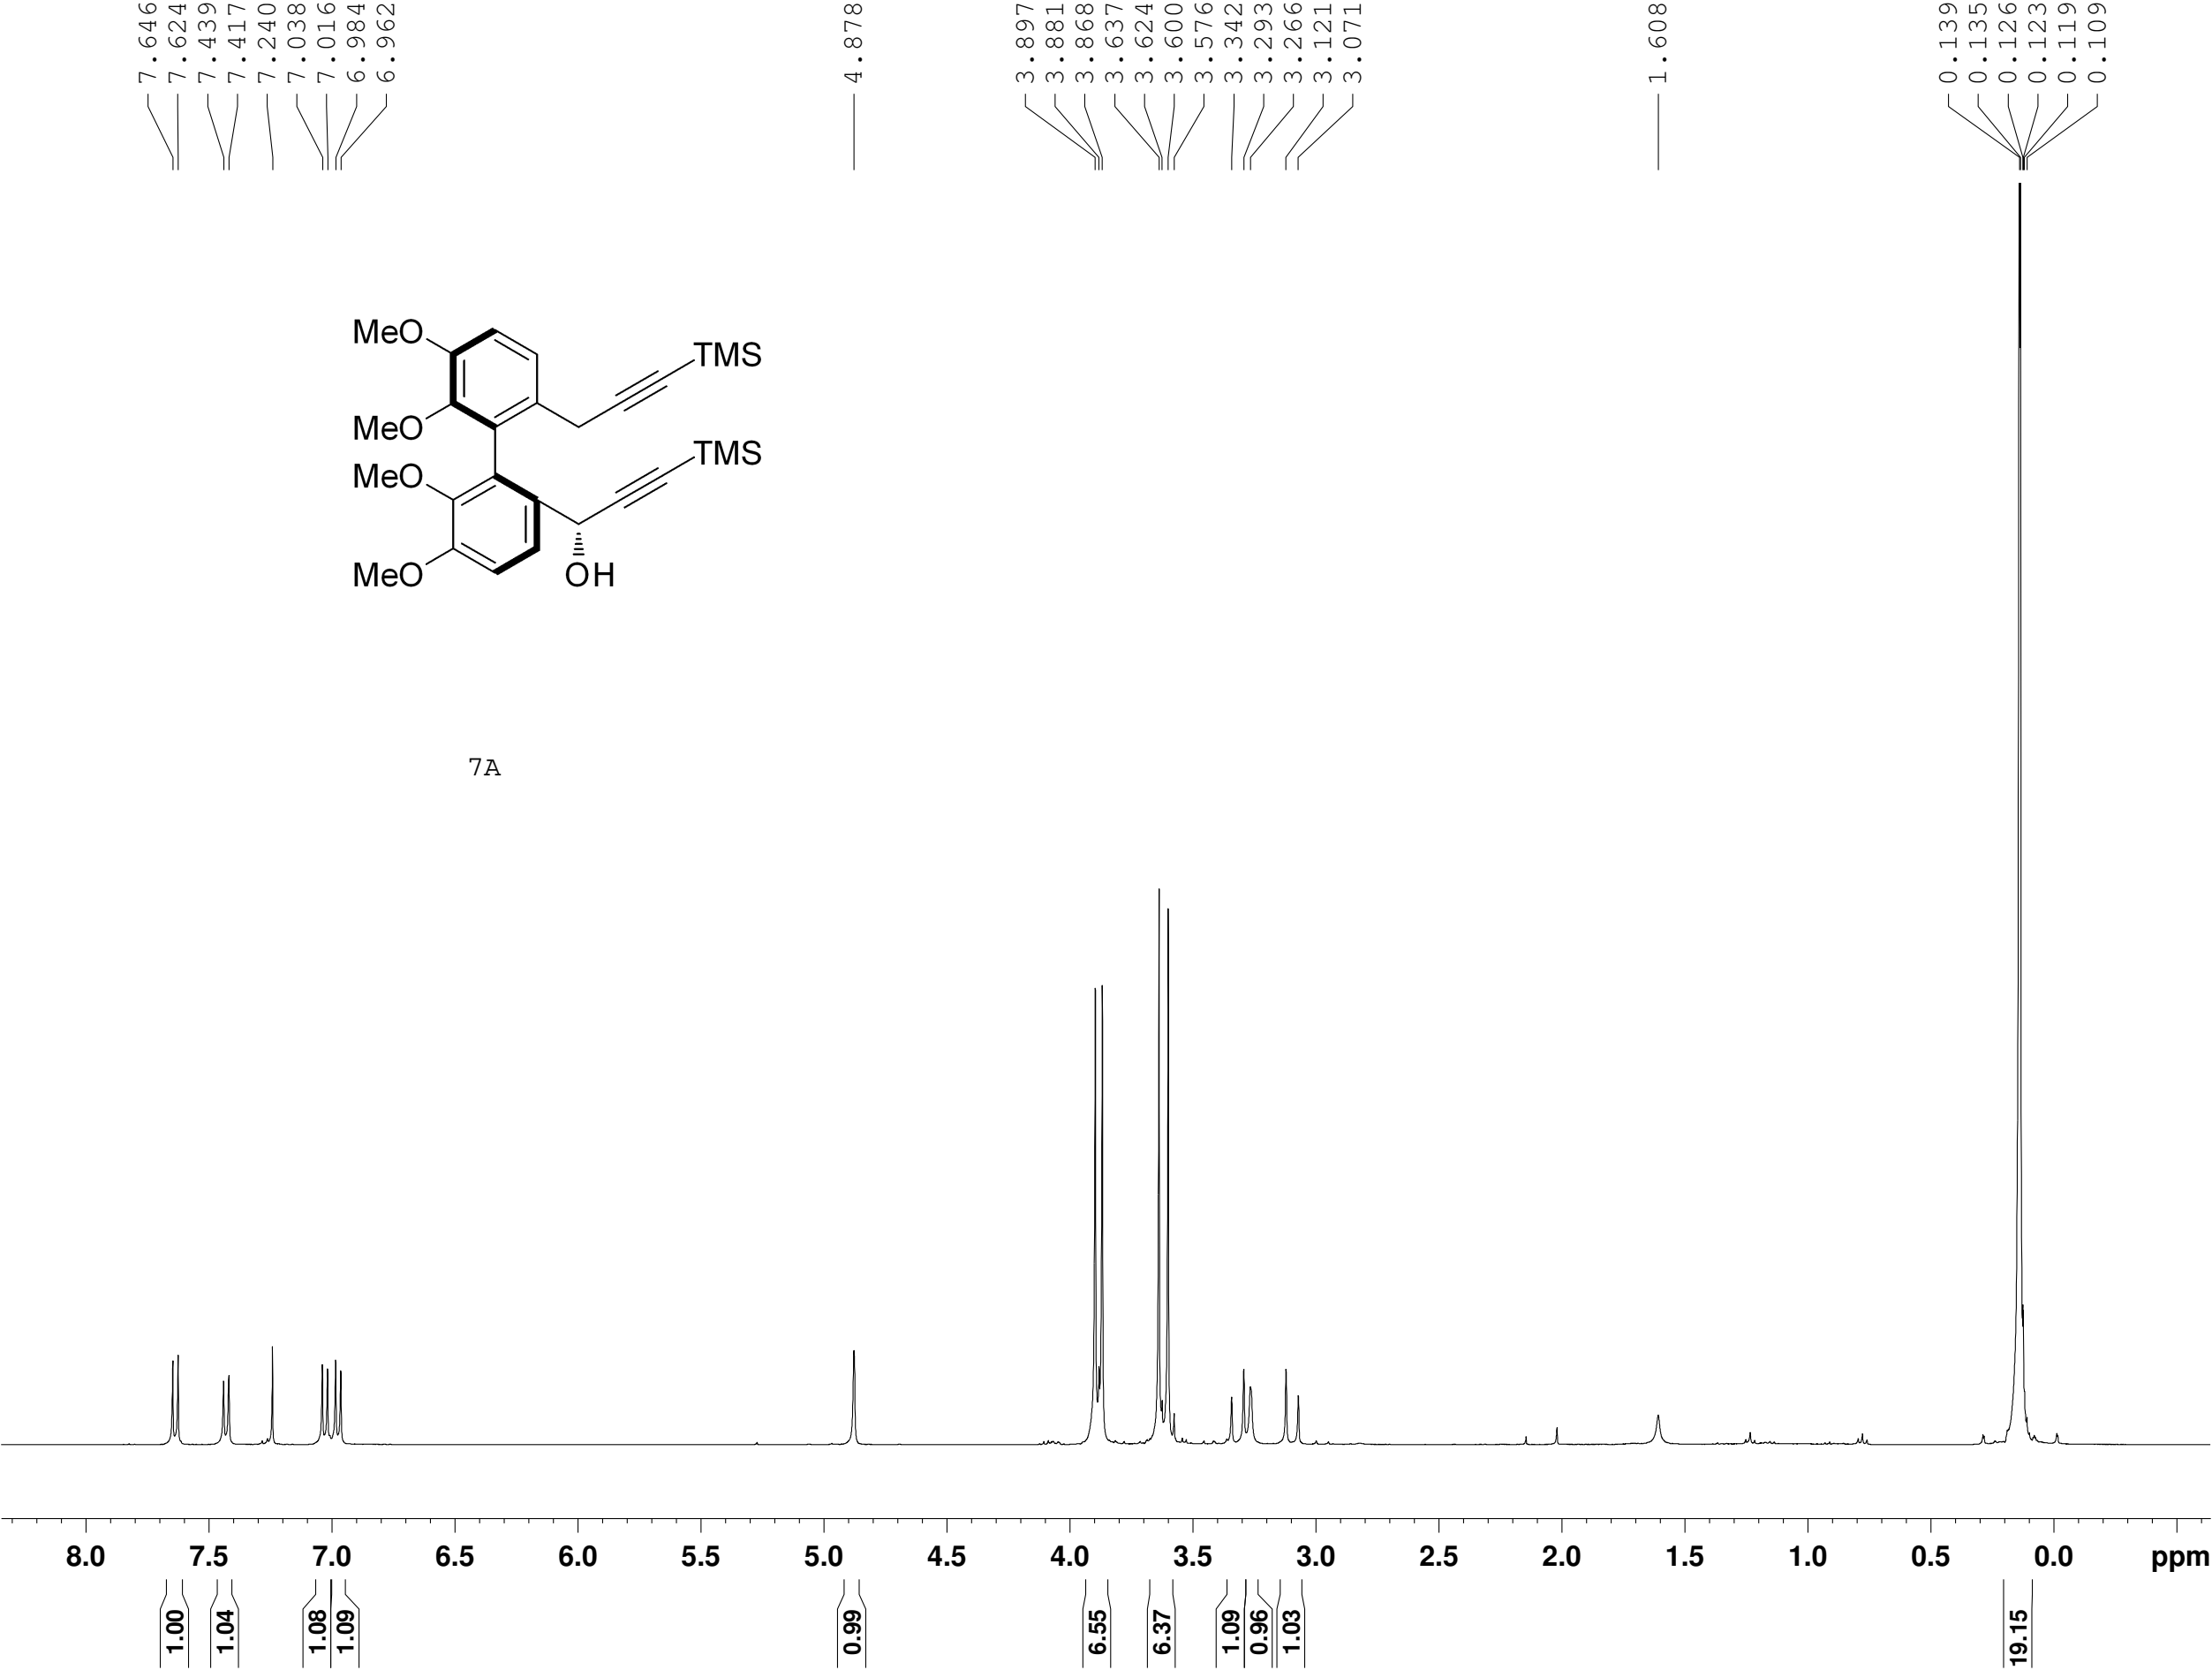

The Ohio State University  
Department of Chemistry  
NMR Facility  
400MHz – 0083

Current Data Parameters

NAME Rs-1-273  
EXPNO 1  
PROCNO 1

F2 - Acquisition Parameters

Date\_ 20071016  
Time 8.55  
INSTRUM spect  
PROBHD 5 mm QNP 1H/13  
PULPROG zg30  
TD 65536  
SOLVENT CDCl3  
NS 16  
DS 2  
SWH 8278.146 Hz  
FIDRES 0.126314 Hz  
AQ 3.9584243 sec  
RG 71.8  
DW 60.400 use  
DE 6.00 use  
TE 0.0 K  
D1 1.00000000 sec  
MCREST 0.00000000 sec  
MCWRK 0.01500000 sec

===== CHANNEL f1 =====

NUC1 1H  
P1 13.00 use  
PL1 0.00 dB  
SFO1 400.1324710 MHz

F2 - Processing parameters

SI 32768  
SF 400.1300176 MHz  
WDW EM  
SSB 0  
LB 0.30 Hz  
GB 0  
PC 1.00

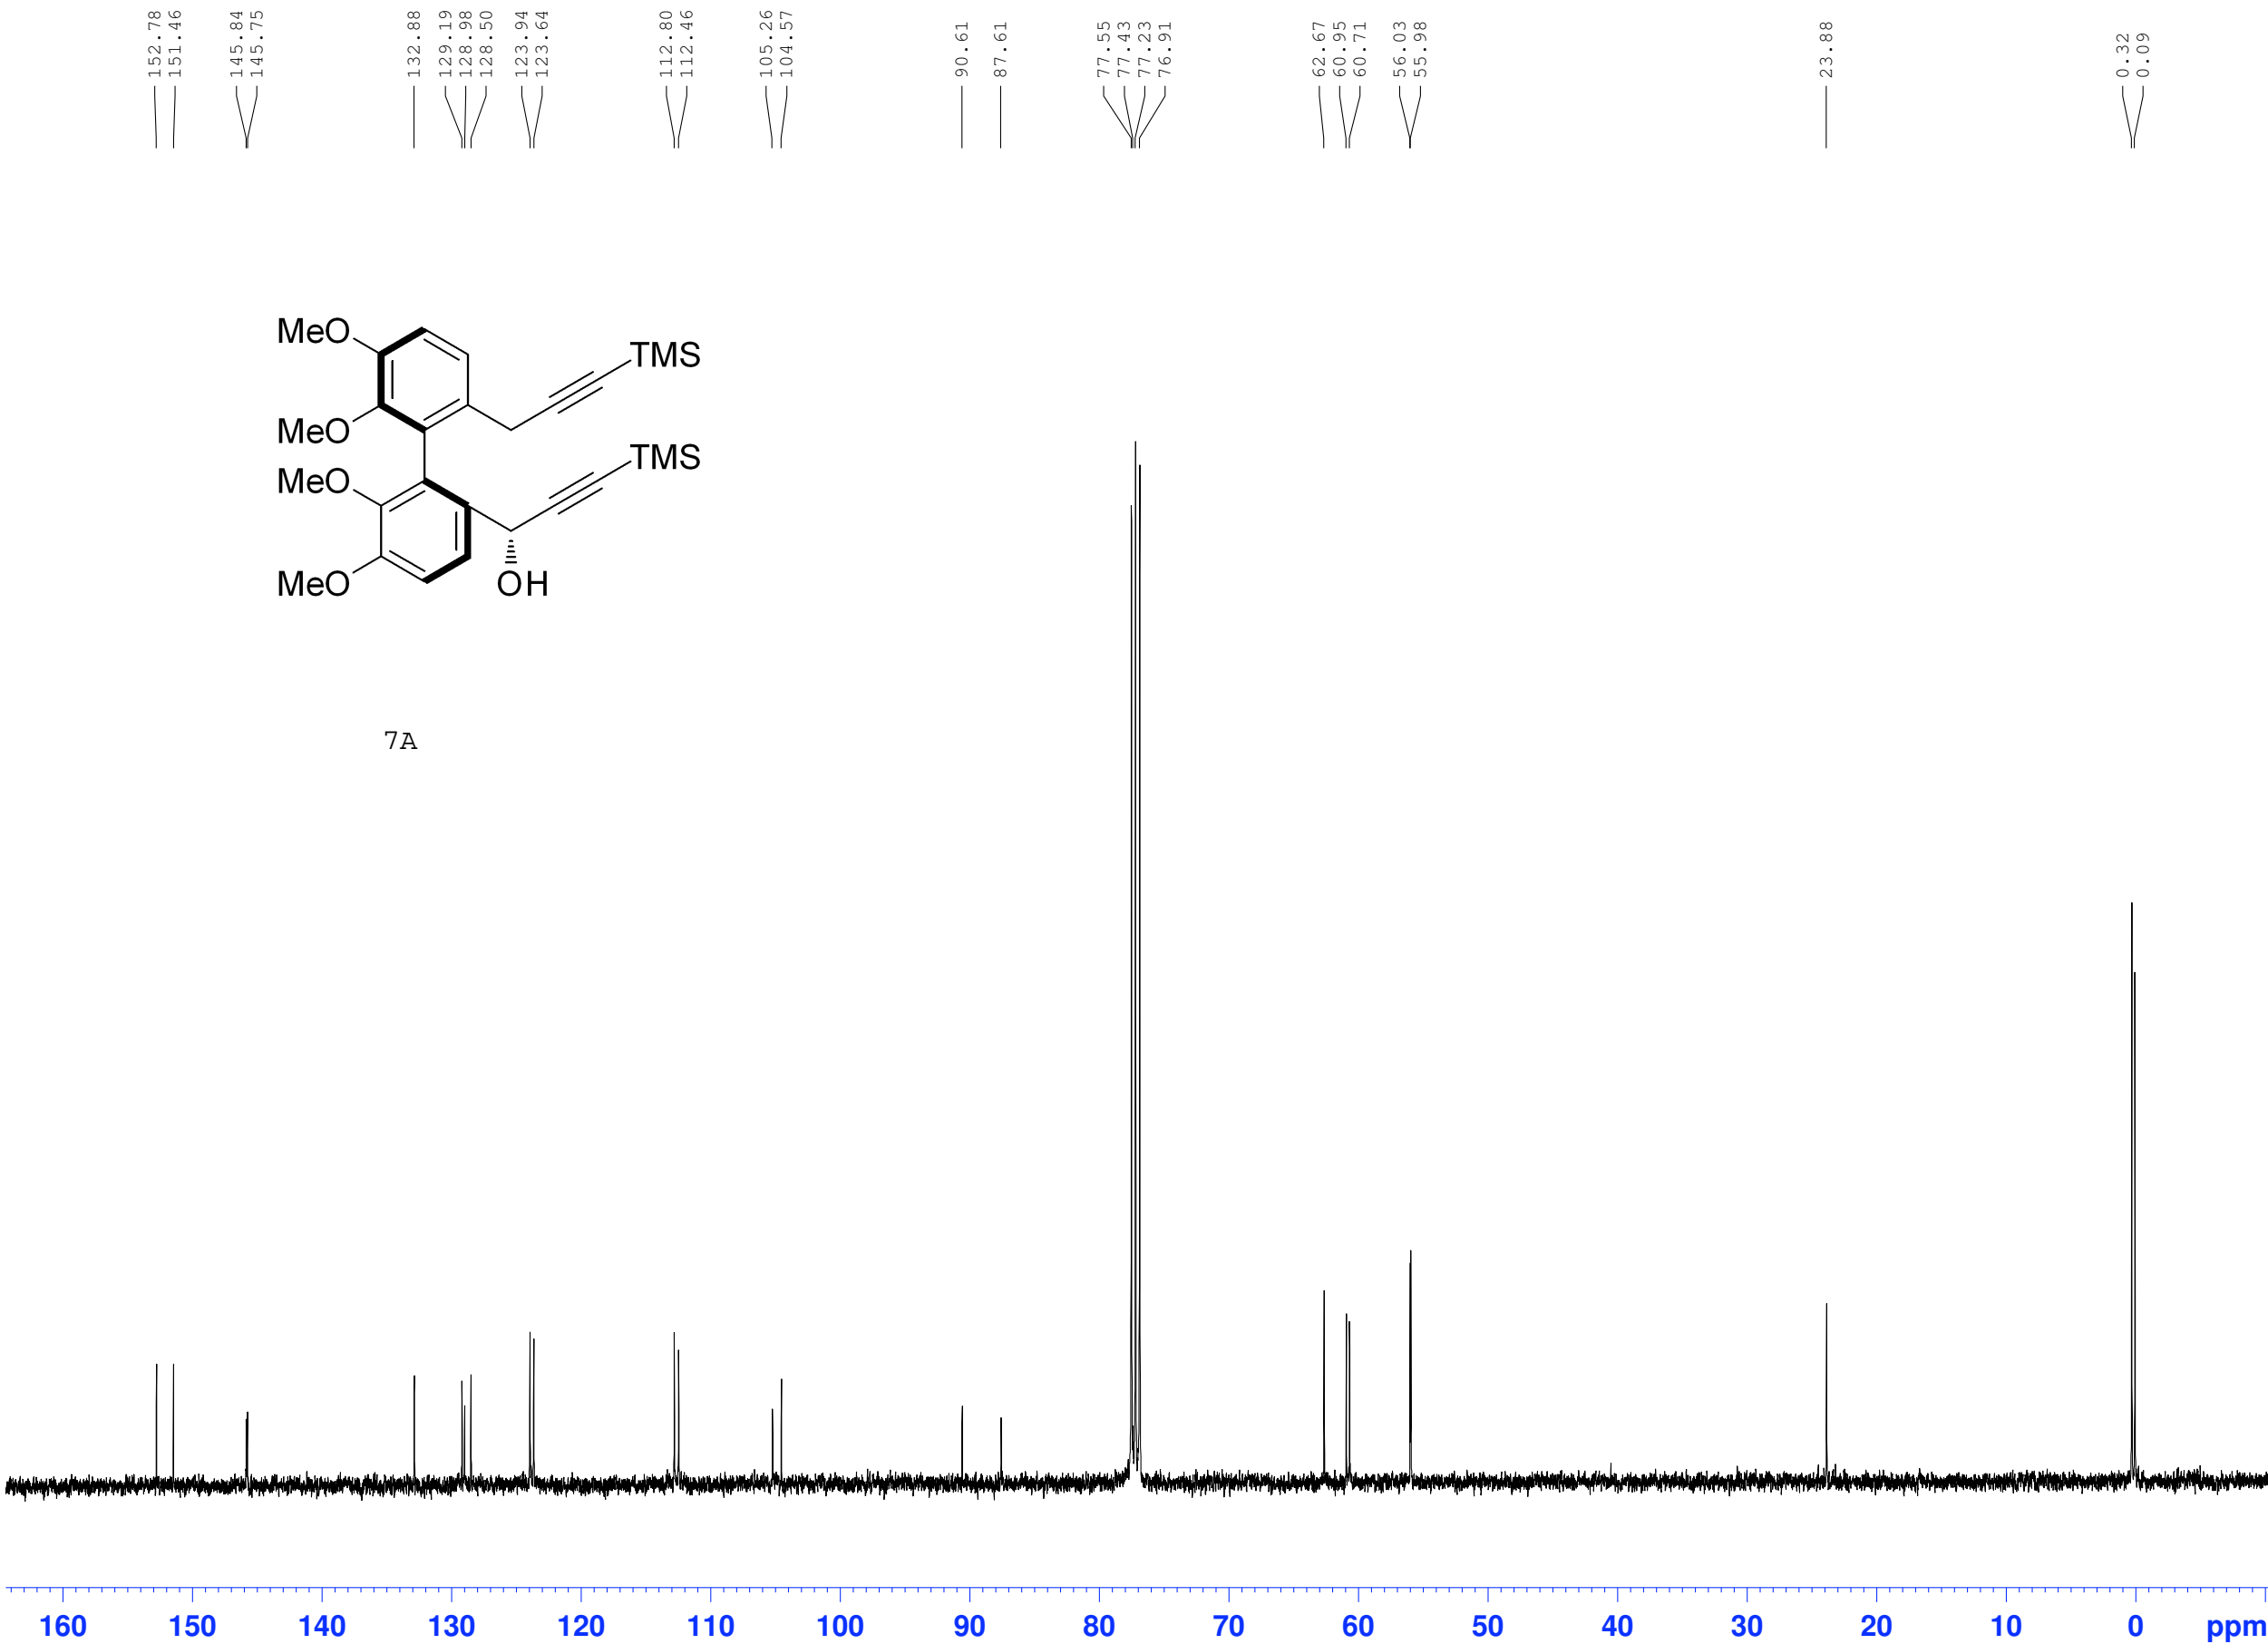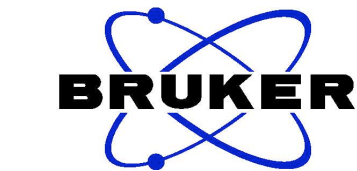

Current Data Parameters  
NAME Rs-1-273-C  
EXPNO 1  
PROCNO 1

F2 - Acquisition Parameters  
Date\_ 20071016  
Time 9.02  
INSTRUM spect  
PROBHD 5 mm QNP 1H/13  
PULPROG zgpg30  
TD 65536  
SOLVENT CDCl3  
NS 450  
DS 4  
SWH 23980.814 Hz  
FIDRES 0.365918 Hz  
AQ 1.3664756 sec  
RG 5160.6  
DW 20.850 use  
DE 6.00 use  
TE 0.0 K  
D1 2.00000000 sec  
d11 0.03000000 sec  
DELTA 1.89999998 sec  
MCREST 0.00000000 sec  
MCWRK 0.01500000 sec

===== CHANNEL f1 =====  
NUC1 13C  
P1 10.50 use  
PL1 0.00 dB  
SFO1 100.6228298 MHz

===== CHANNEL f2 =====  
CPDPRG2 waltz16  
NUC2 1H  
PCPD2 80.00 use  
PL2 -6.00 dB  
PL12 14.56 dB  
PL13 16.50 dB  
SFO2 400.1316005 MHz

F2 - Processing parameters  
SI 32768  
SF 100.6127483 MHz  
WDW EM  
SSB 0  
LB 1.00 Hz  
GB 0  
PC 1.40

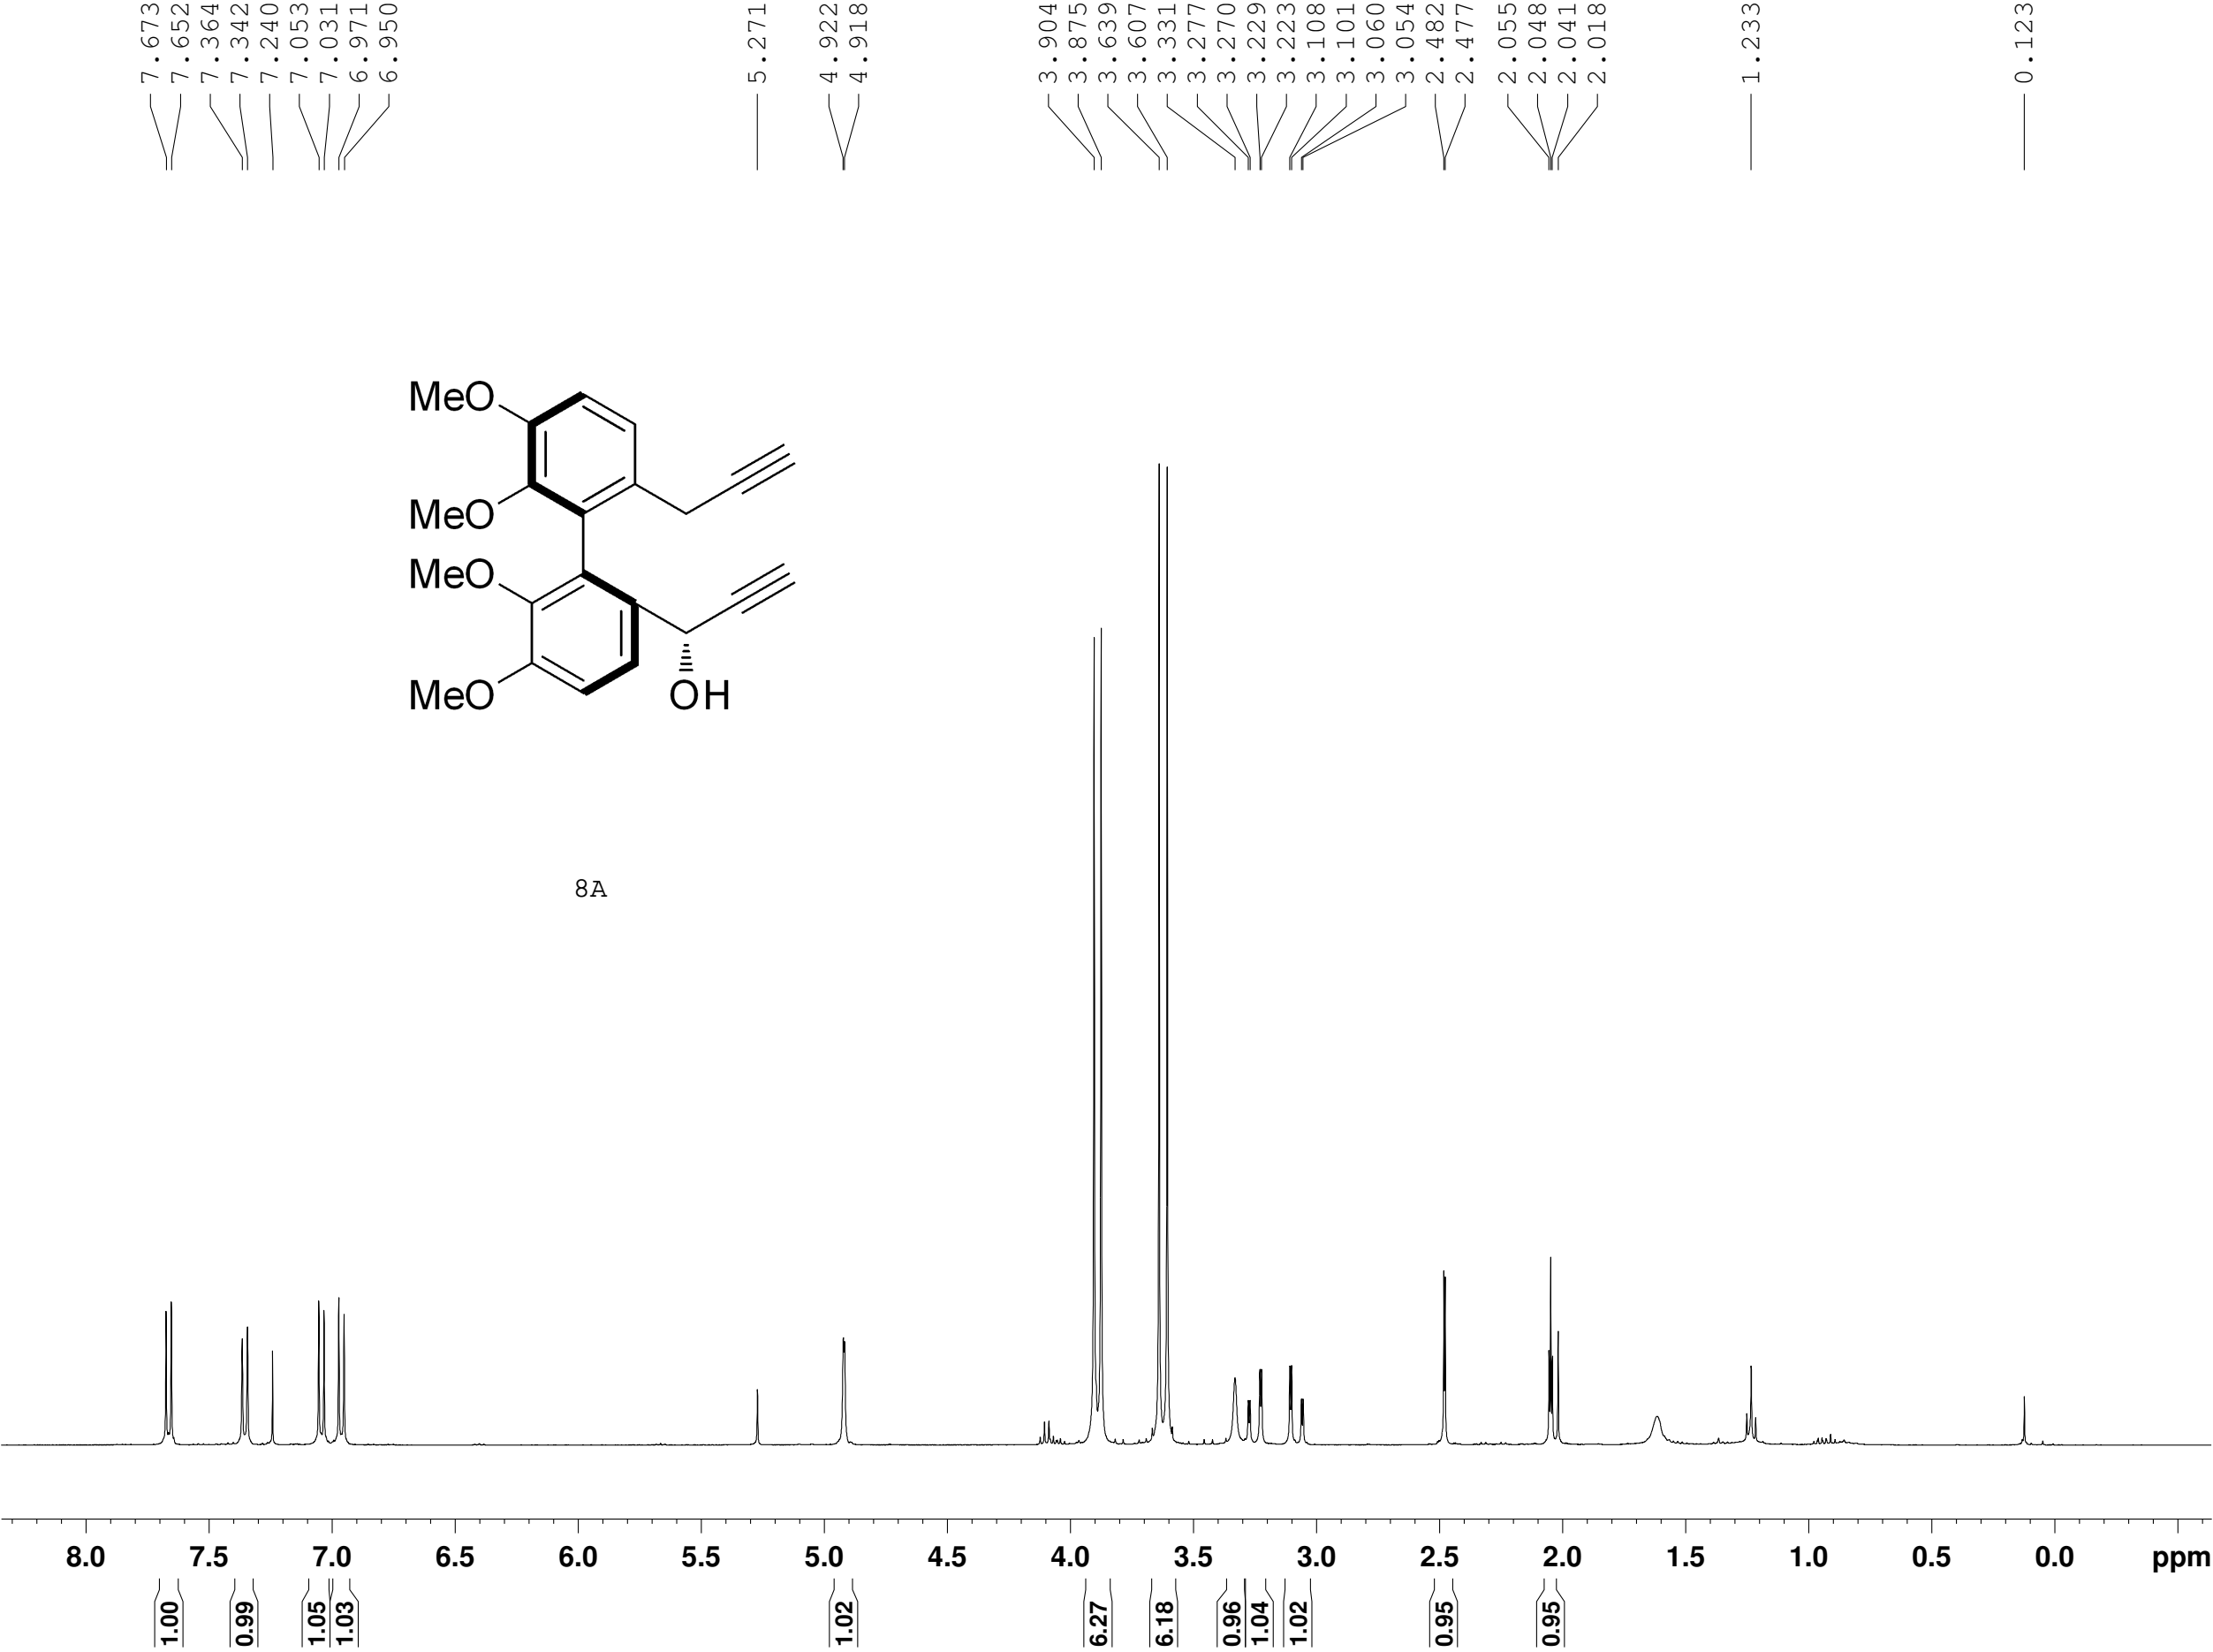

The Ohio State University  
Department of Chemistry  
NMR Facility  
400MHz – 0083

Current Data Parameters  
NAME Rs-I-72A  
EXPNO 1  
PROCNO 1

F2 - Acquisition Parameters  
Date\_ 20070601  
Time 14.06  
INSTRUM spect  
PROBHD 5 mm QNP 1H/13  
PULPROG zg30  
TD 65536  
SOLVENT CDCl3  
NS 16  
DS 2  
SWH 8278.146 Hz  
FIDRES 0.126314 Hz  
AQ 3.9584243 sec  
RG 143.7  
DW 60.400 use  
DE 6.00 use  
TE 300.2 K  
D1 1.00000000 sec  
MCREST 0.00000000 sec  
MCWRK 0.01500000 sec

===== CHANNEL f1 =====  
NUC1 1H  
P1 13.00 use  
PL1 0.00 dB  
SFO1 400.1324710 MHz

F2 - Processing parameters  
SI 32768  
SF 400.1300176 MHz  
WDW EM  
SSB 0  
LB 0.30 Hz  
GB 0  
PC 1.00



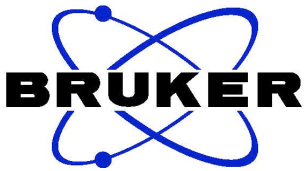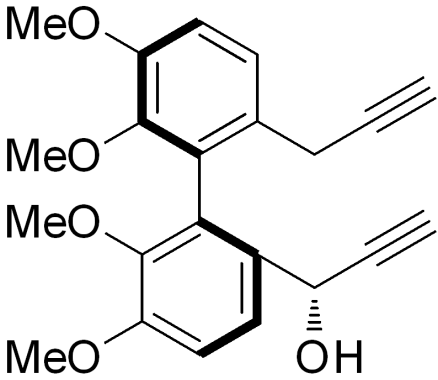

8A

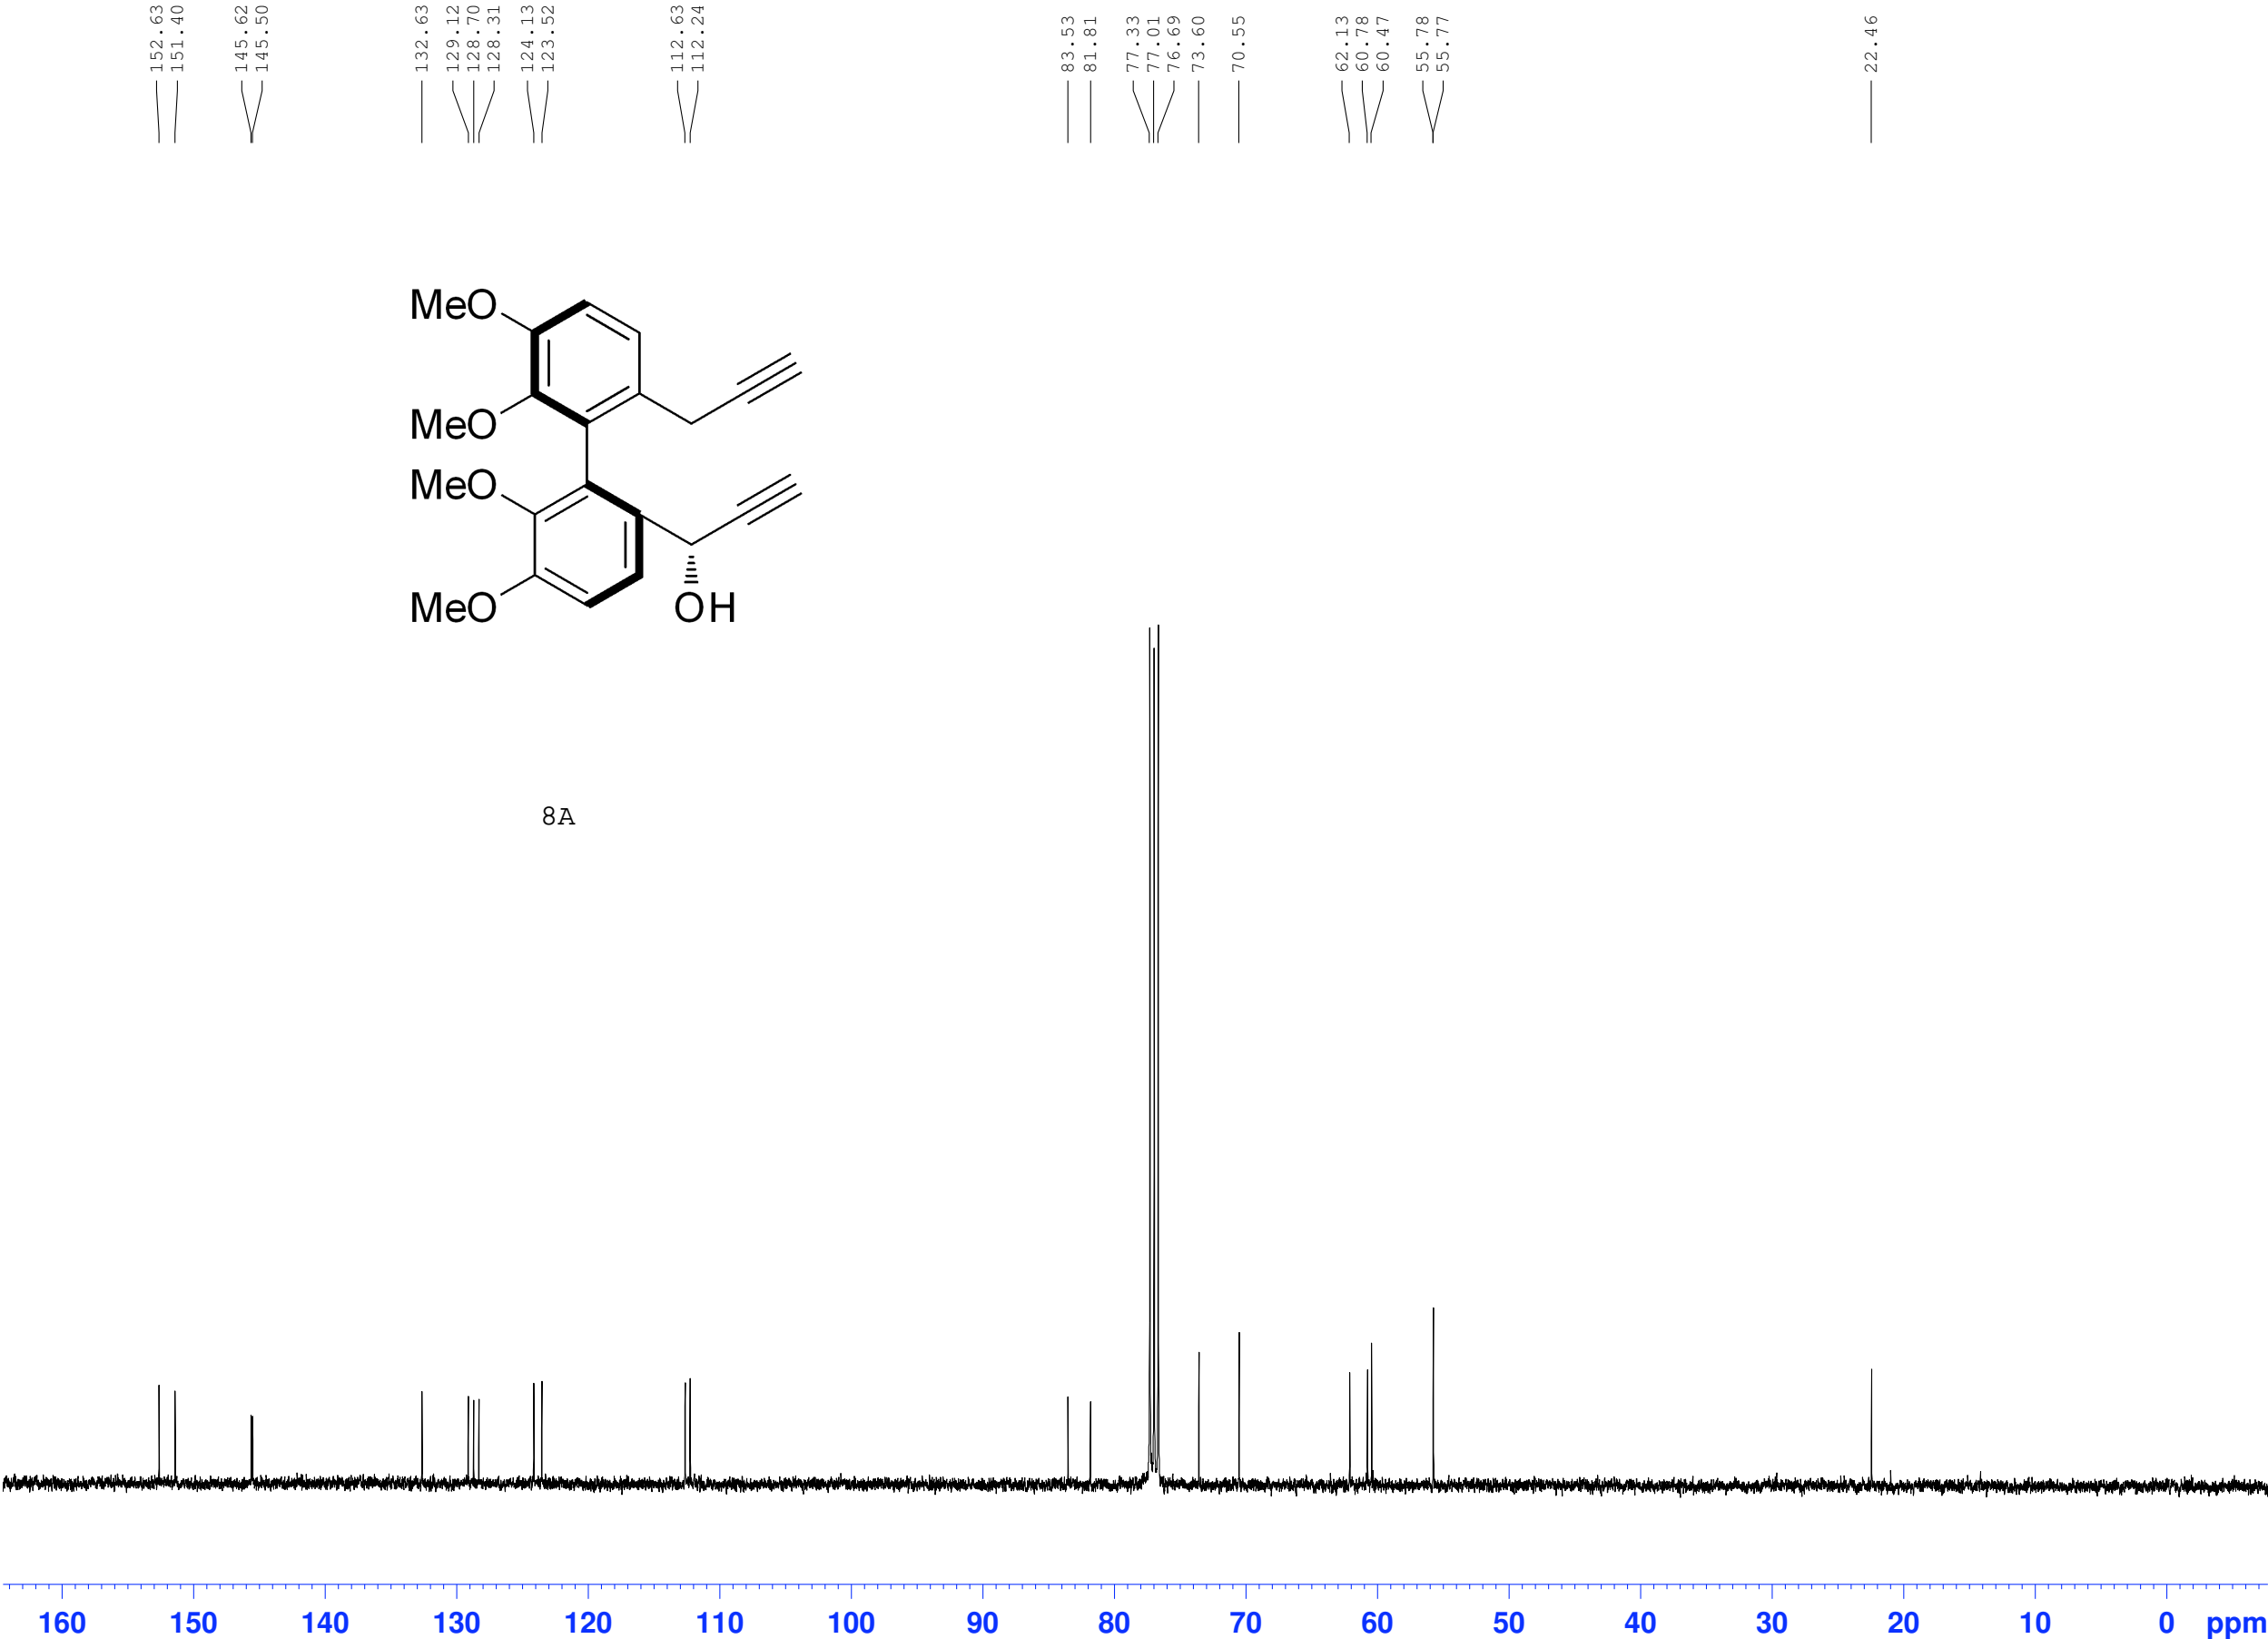

Current Data Parameters  
NAME Rs-I-72AC  
EXPNO 1  
PROCNO 1

F2 - Acquisition Parameters  
Date\_ 20070601  
Time 14.39  
INSTRUM spect  
PROBHD 5 mm QNP 1H/13  
PULPROG zgpg30  
TD 65536  
SOLVENT CDC13  
NS 492  
DS 4  
SWH 23980.814 Hz  
FIDRES 0.365918 Hz  
AQ 1.3664756 sec  
RG 2896.3  
DW 20.850 use  
DE 6.00 use  
TE 300.2 K  
D1 2.00000000 sec  
d11 0.03000000 sec  
DELTA 1.89999998 sec  
MCREST 0.00000000 sec  
MCWRK 0.01500000 sec

===== CHANNEL f1 =====  
NUC1 13C  
P1 10.50 use  
PL1 0.00 dB  
SFO1 100.6228298 MHz

===== CHANNEL f2 =====  
CPDPRG2 waltz16  
NUC2 1H  
PCPD2 80.00 use  
PL2 -6.00 dB  
PL12 14.56 dB  
PL13 120.00 dB  
SFO2 400.1316005 MHz

F2 - Processing parameters  
SI 32768  
SF 100.6127715 MHz  
WDW EM  
SSB 0  
LB 1.00 Hz  
GB 0  
PC 1.40

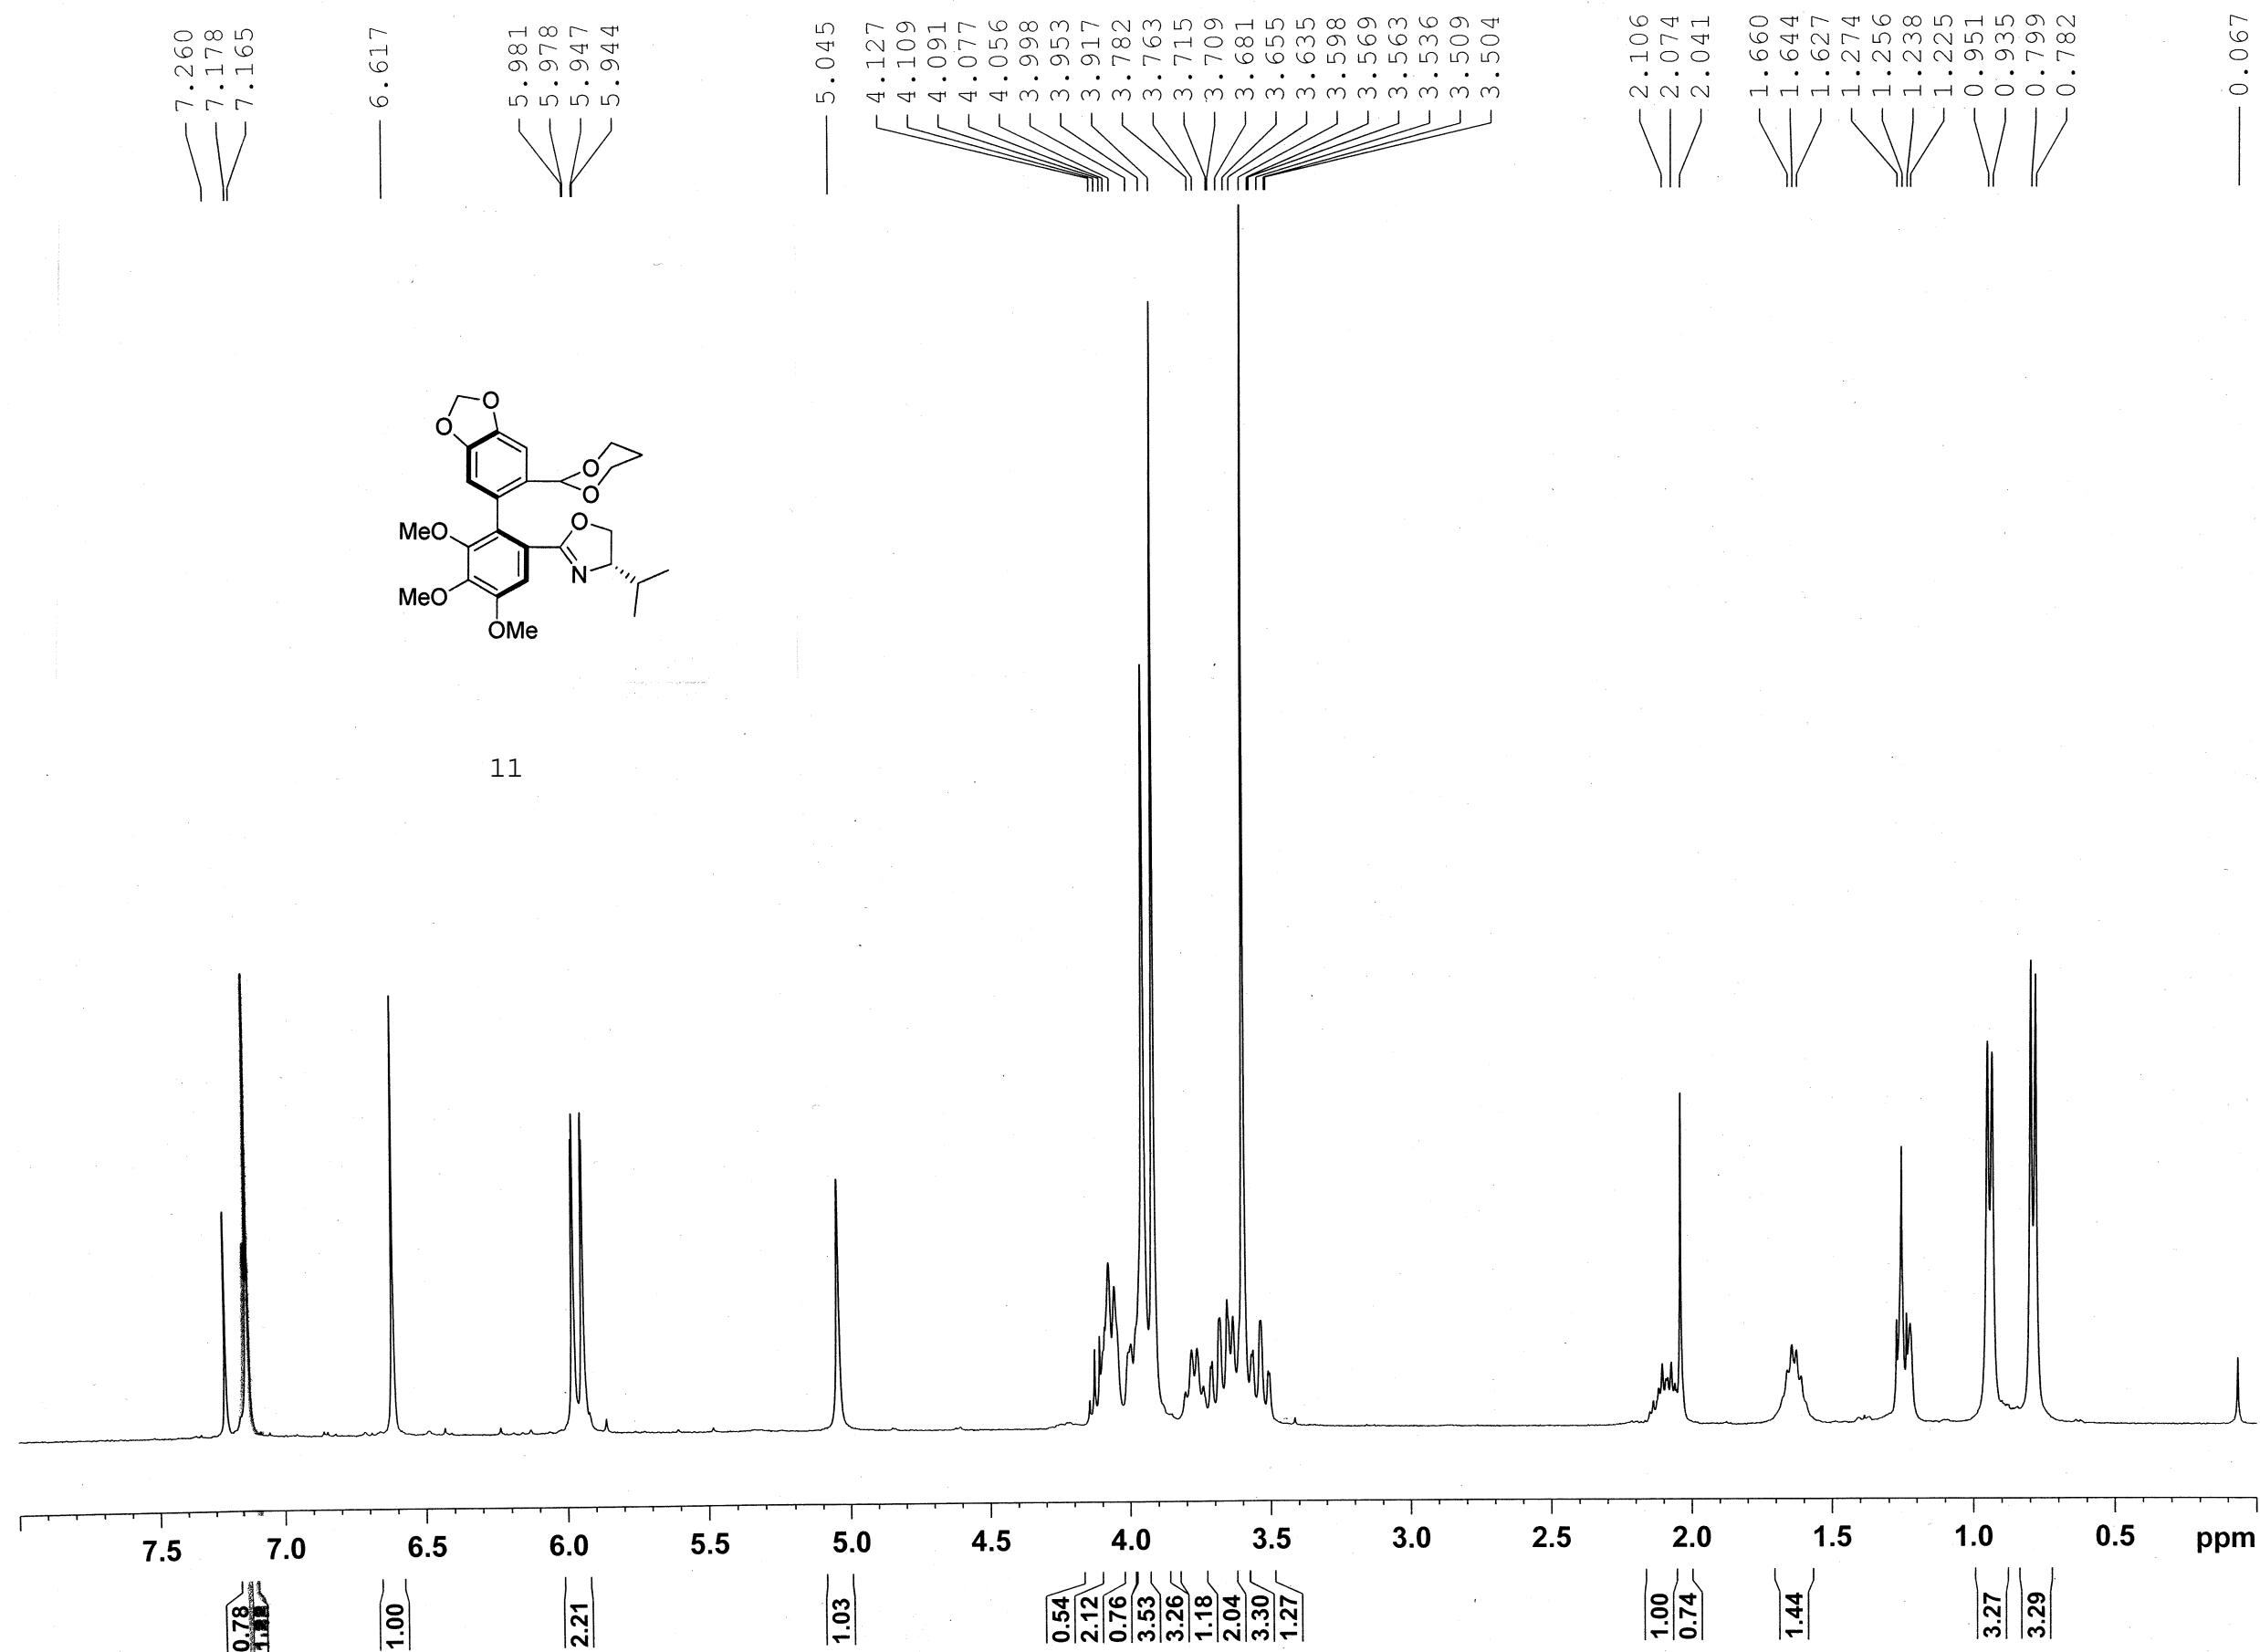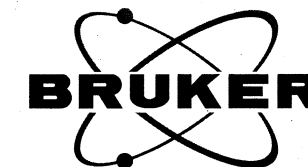

Current Data Parameters  
NAME Wgong-I-56A  
EXPNO 2  
PROCNO 1

F2 - Acquisition Parameters  
Date\_ 20090429  
Time 17.05  
INSTRUM spect  
PROBHD 5 mm QNP 1H/13  
PULPROG zg30  
TD 65536  
SOLVENT CDCl3  
NS 16  
DS 2  
SWH 8278.146 Hz  
FIDRES 0.126314 Hz  
AQ 3.9584243 sec  
RG 228.1  
DW 60.400 usec  
DE 6.00 usec  
TE 299.2 K  
D1 1.0000000 sec  
MCREST 0.0000000 sec  
MCWRK 0.0150000 sec

===== CHANNEL f1 =====  
NUC1 1H  
P1 13.00 usec  
PL1 0.00 dB  
SFO1 400.1324710 MHz

F2 - Processing parameters  
SI 32768  
SF 400.1300096 MHz  
WDW EM  
SSB 0  
LB 0.30 Hz  
GB 0  
PC 1.00

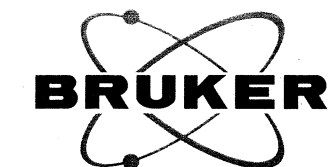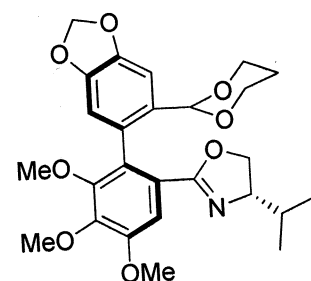

11

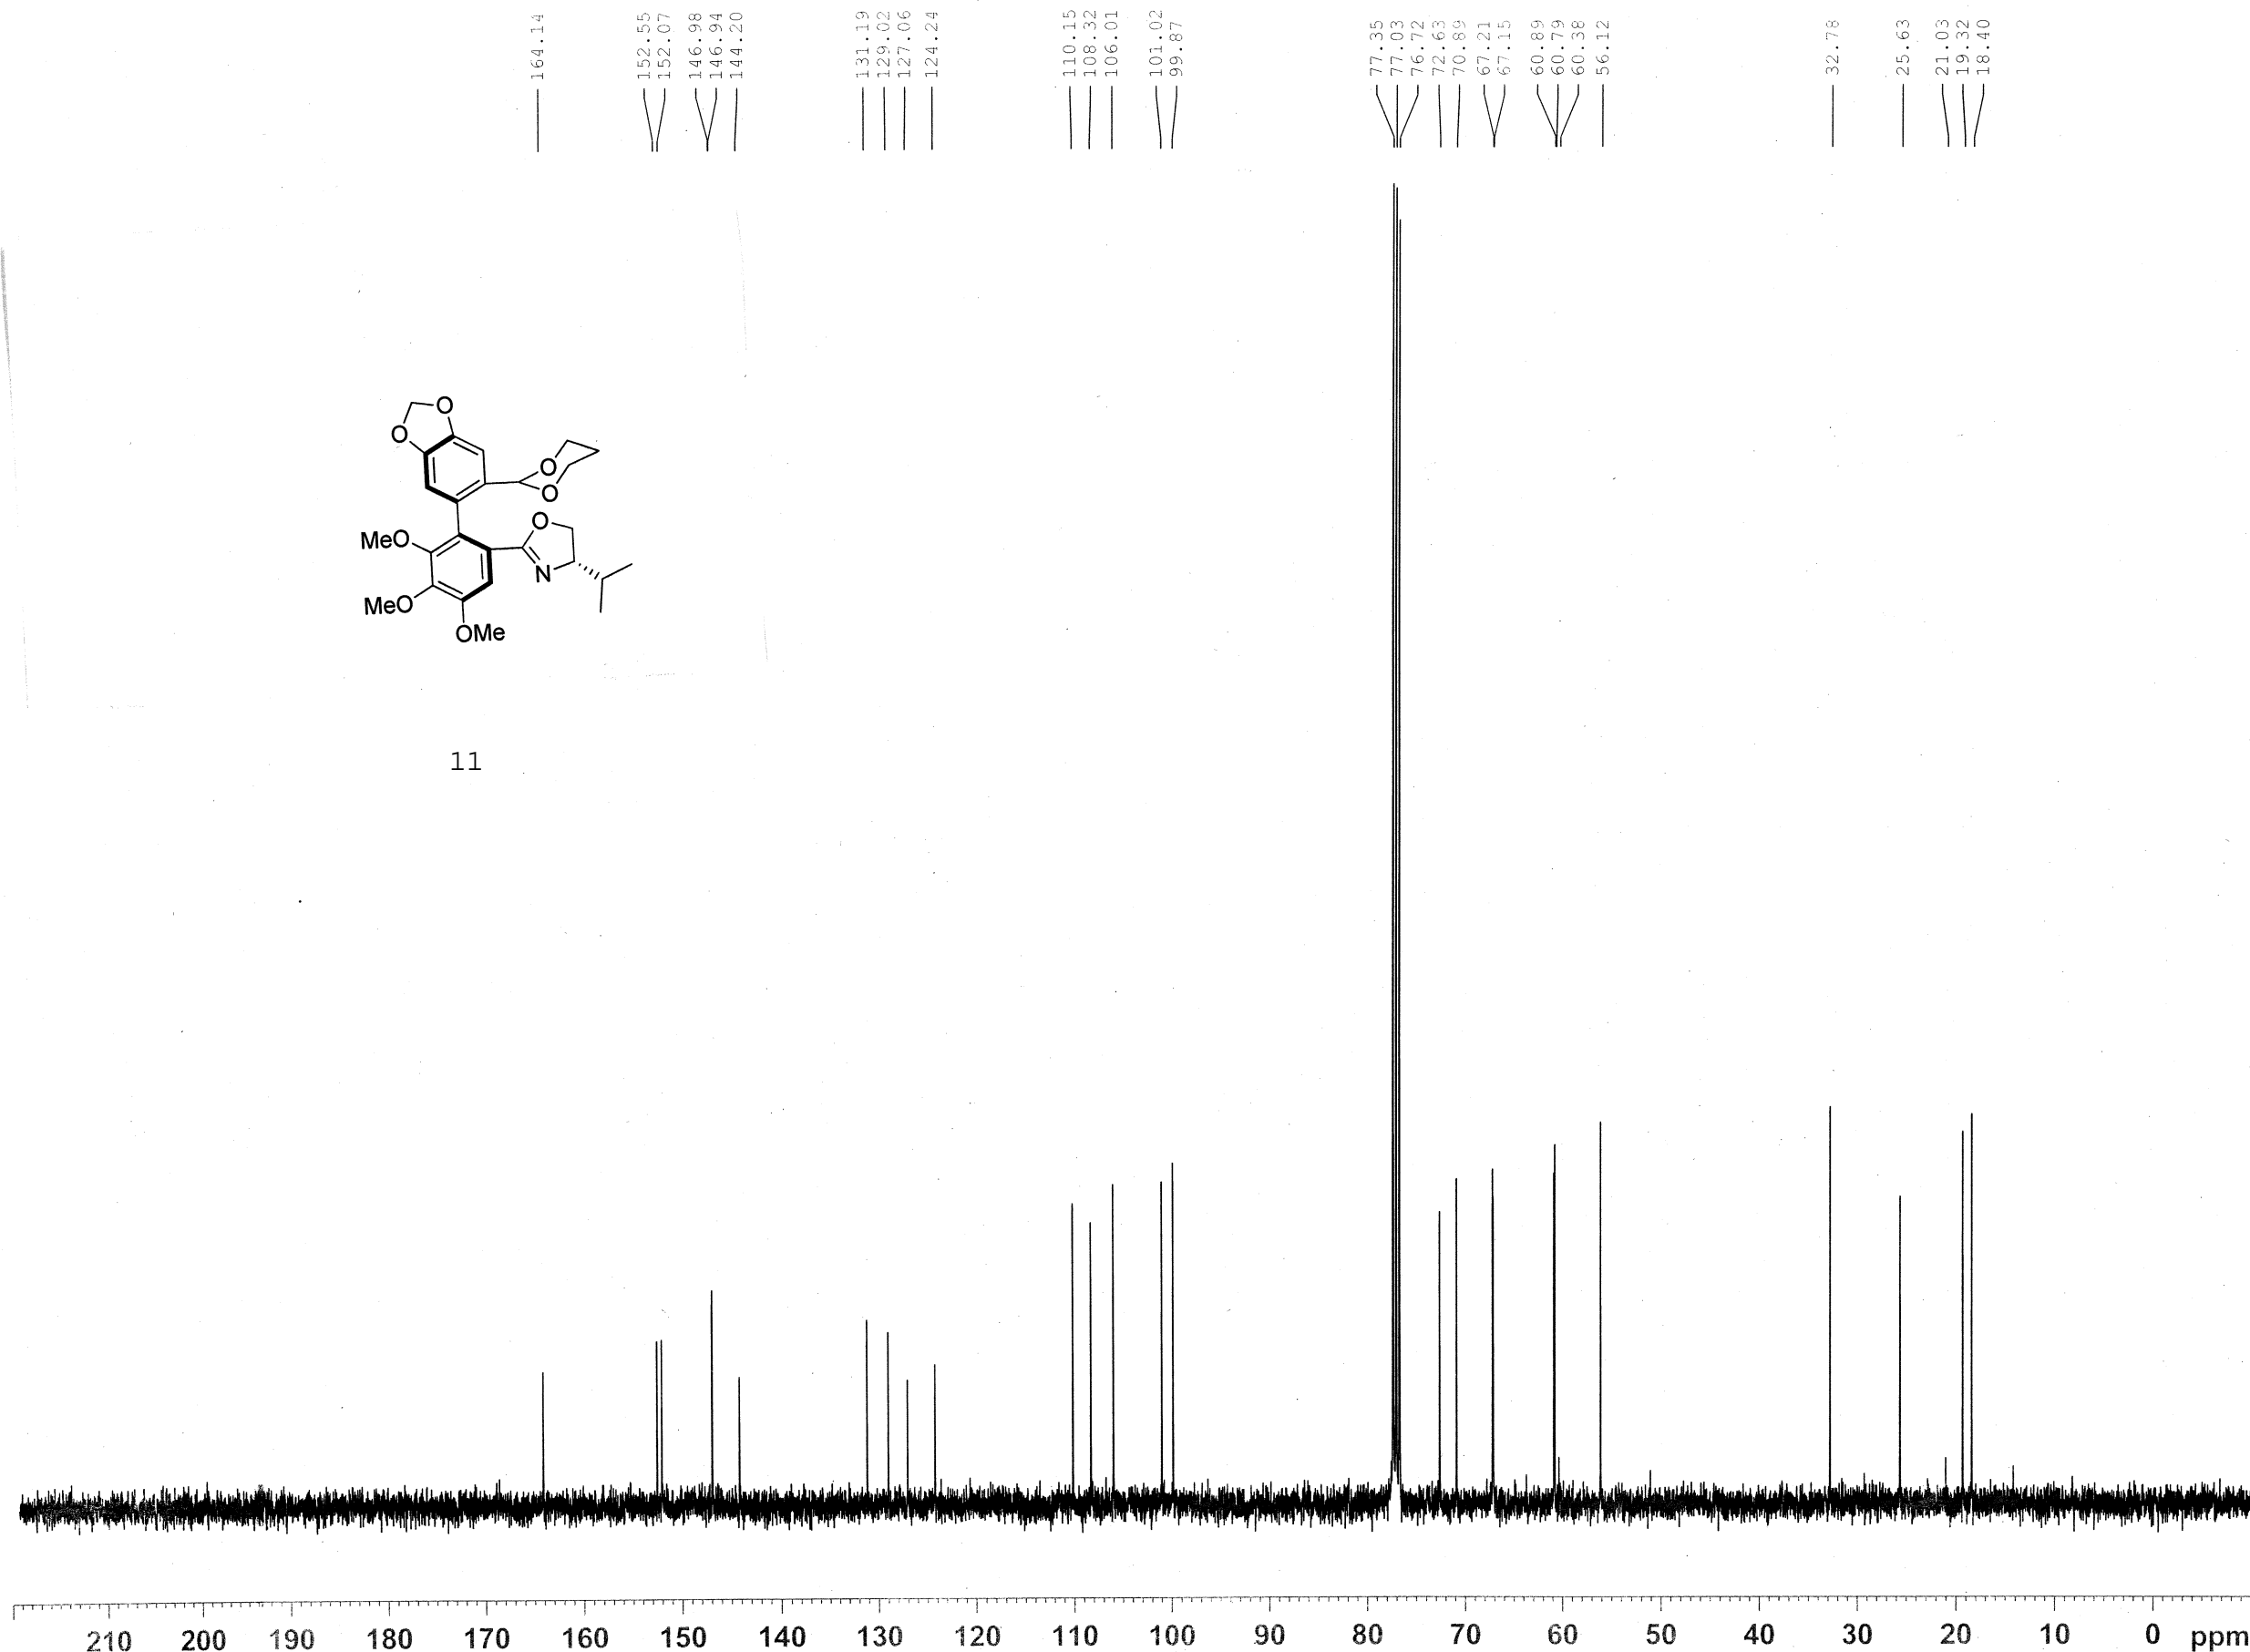

Current Data Parameters  
NAME wgong-I-56A  
EXPNO 2  
PROCNO 1

F2 - Acquisition Parameters  
Date\_ 20090503  
Time\_ 11.26  
INSTRUM spect  
PROBHD 5 mm QNP 1H/13  
PULPROG zgpg30  
TD 65536  
SOLVENT CDCl3  
NS 406  
DS 4  
SWH 23980.814 Hz  
FIDRES 0.365918 Hz  
AQ 1.3664756 sec  
RG 1024  
DW 20.850 usec  
DE 6.00 usec  
TE 300.2 K  
D1 2.00000000 sec  
d11 0.03000000 sec  
DELTA 1.89999998 sec  
MCREST 0.00000000 sec  
MCWRK 0.01500000 sec

===== CHANNEL f1 =====  
NUC1 13C  
P1 10.50 usec  
PL1 0.00 dB  
SFO1 100.6228298 MHz

===== CHANNEL f2 =====  
CPDPRG2 waltz16  
NUC2 1H  
PCPD2 80.00 usec  
PL2 -6.00 dB  
PL12 14.56 dB  
PL13 16.50 dB  
SFO2 400.1316005 MHz

F2 - Processing parameters  
SI 32768  
SF 100.6127690 MHz  
WDW EM  
SSB 0  
LB 1.00 Hz  
GB 0  
PC 1.00

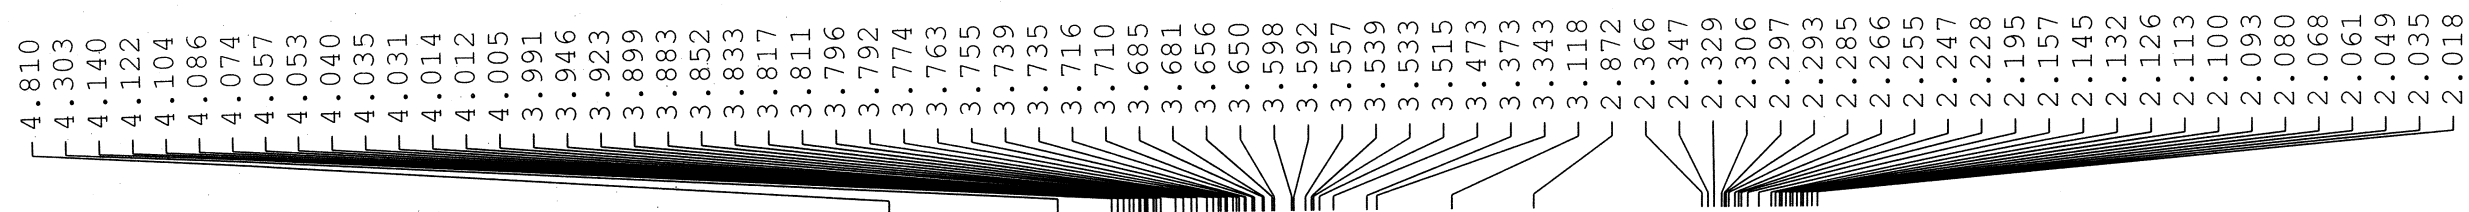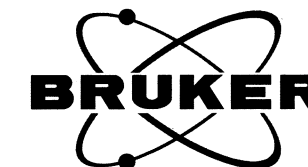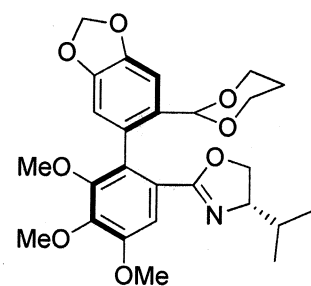

12

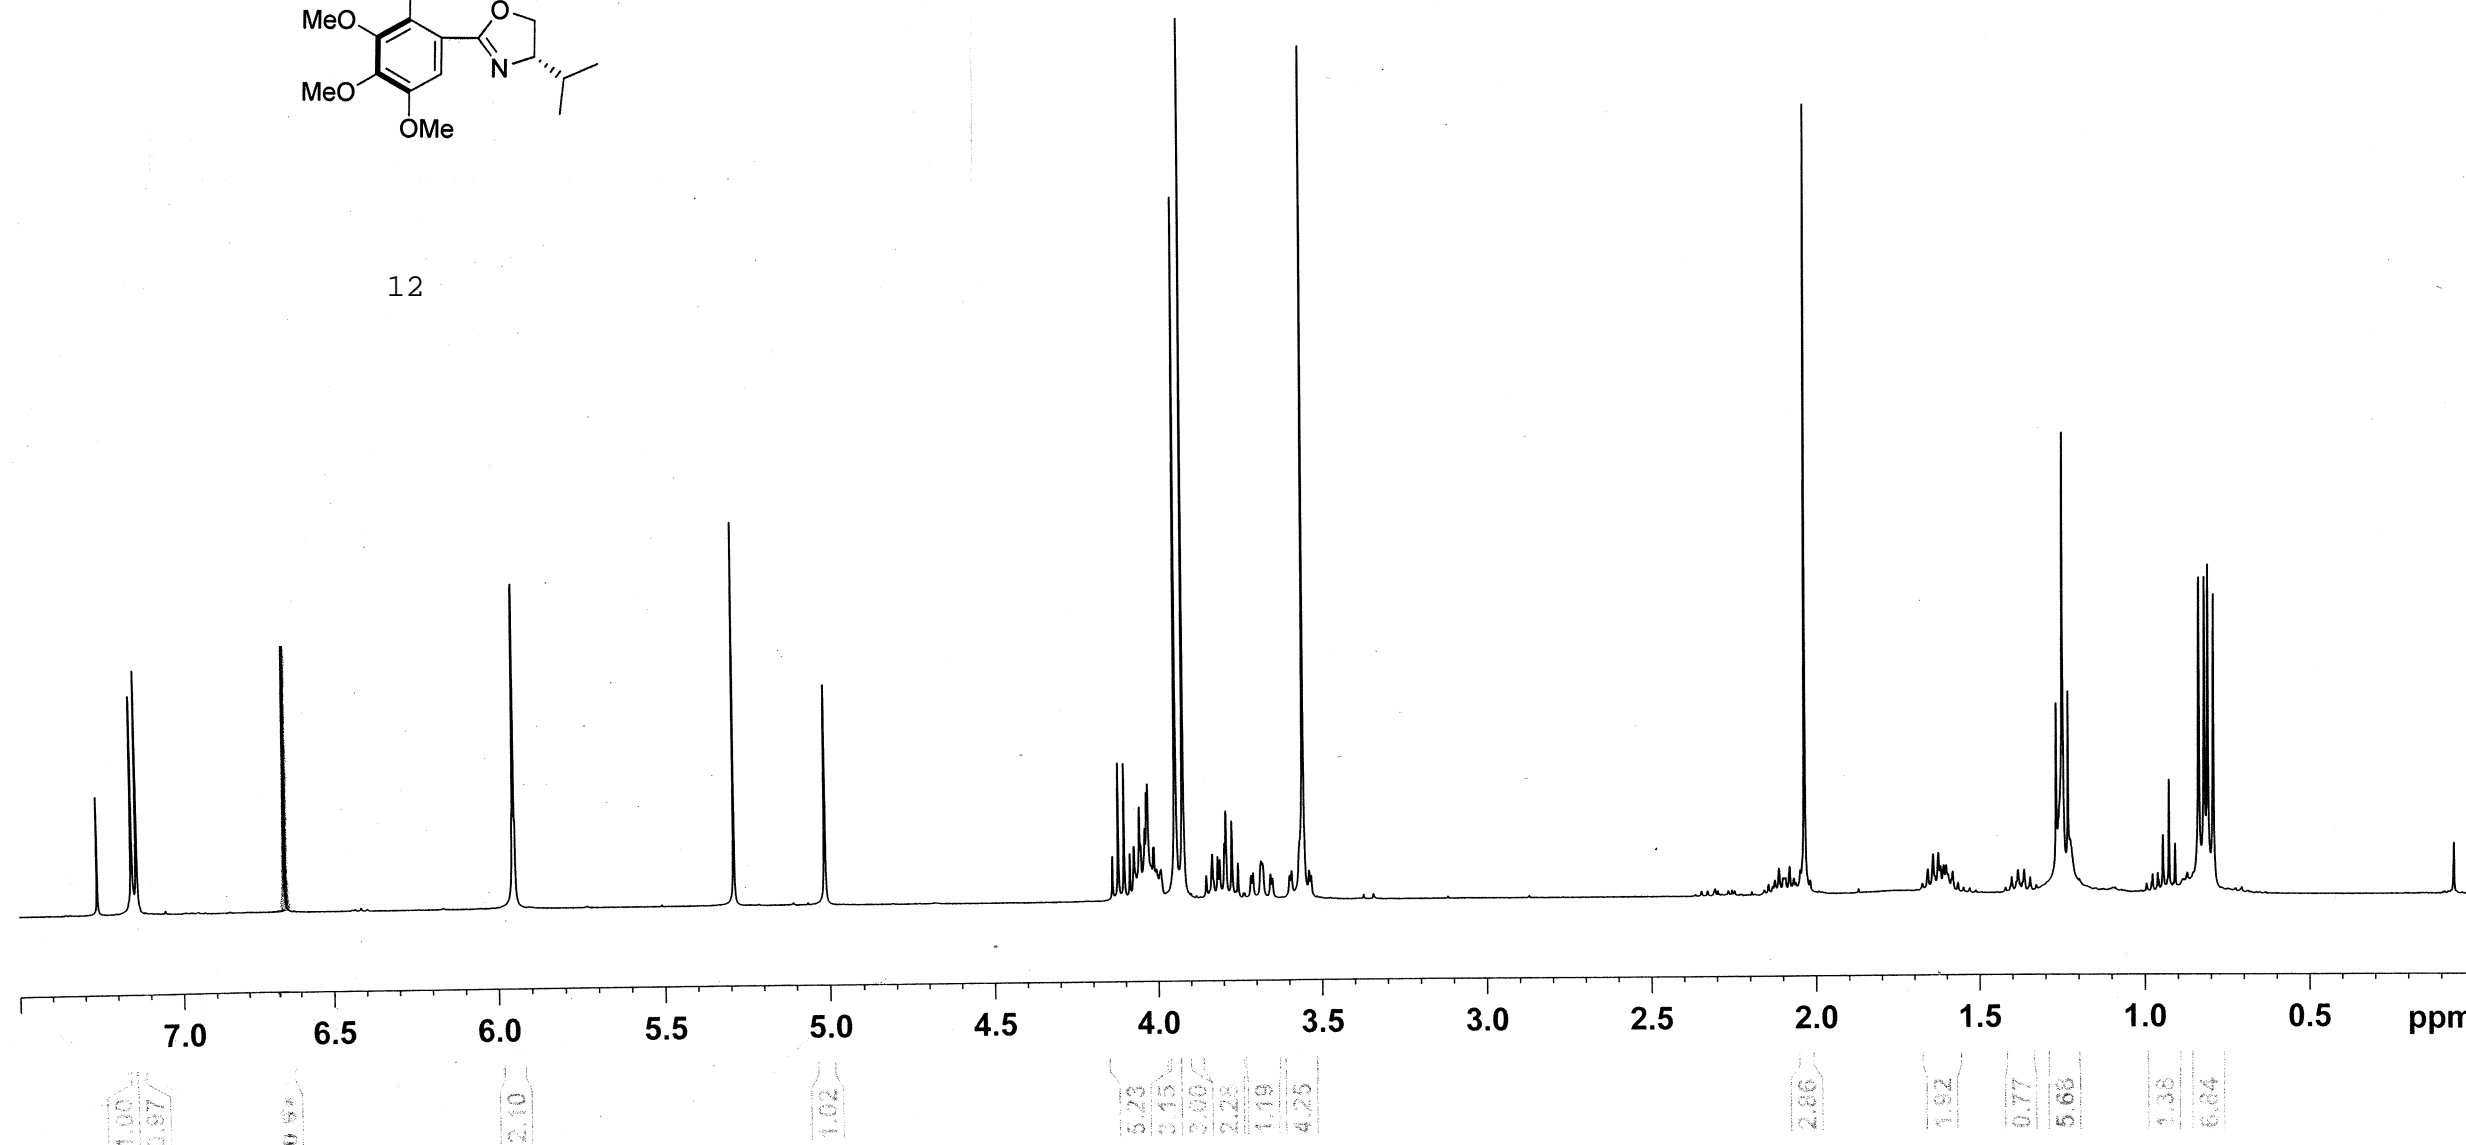

Current Data Parameters  
NAME Wgong-I-35B  
EXPNO 1  
PROCNO 1

F2 - Acquisition Parameters  
Date\_ 20080916  
Time 15.24  
INSTRUM spect  
PROBHD 5 mm QNP 1H/13  
PULPROG zg30  
TD 65536  
SOLVENT CDCl3  
NS 16  
DS 2  
SWH 8278.146 Hz  
FIDRES 0.126314 Hz  
AQ 3.9584243 sec  
RG 143.7  
DW 60.400 usec  
DE 6.00 usec  
TE 300.2 K  
D1 1.00000000 sec  
MCREST 0.00000000 sec  
MCWRK 0.01500000 sec

===== CHANNEL f1 =====  
NUC1 1H  
P1 13.00 usec  
PL1 0.00 dB  
SFO1 400.1324710 MHz

F2 - Processing parameters  
SI 32768  
SF 400.1300096 MHz  
WDW EM  
SSB 0  
LB 0.30 Hz  
GB 0  
PC 1.00

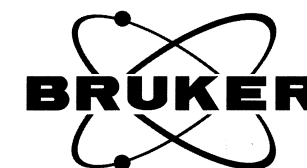

Current Data Parameters  
NAME Wgong-I-35B p C13  
EXPNO 412  
PROCNO 1

F2 - Acquisition Parameters  
Date\_ 20110305  
Time\_ 10.18  
INSTRUM spect  
PROBHD 5 mm QNP 1H/13  
PULPROG zgpg30  
TD 65536  
SOLVENT CDC13  
NS 97  
DS 4  
SWH 23980.814 Hz  
FIDRES 0.365918 Hz  
AQ 1.3664756 sec  
RG 5792.6  
DW 20.850 usec  
DE 6.00 usec  
TE 300.2 K  
D1 2.00000000 sec  
d11 0.03000000 sec  
DELTA 1.89999998 sec  
TD0 1

===== CHANNEL f1 =====  
NUC1 13C  
P1 10.50 usec  
PL1 0.00 dB  
SFO1 100.6228298 MHz

===== CHANNEL f2 =====  
CPDPRG2 waltz16  
NUC2 1H  
PCPD2 80.00 usec  
PL2 -6.00 dB  
PL12 14.56 dB  
PL13 16.50 dB  
SFO2 400.1316005 MHz

F2 - Processing parameters  
SI 32768  
SF 100.6127690 MHz  
WDW EM  
SSB 0  
LB 1.00 Hz  
GB 0  
PC 1.40

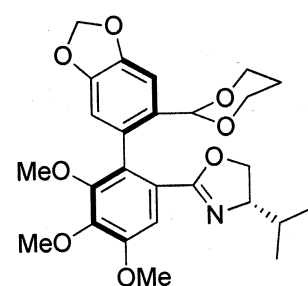

12

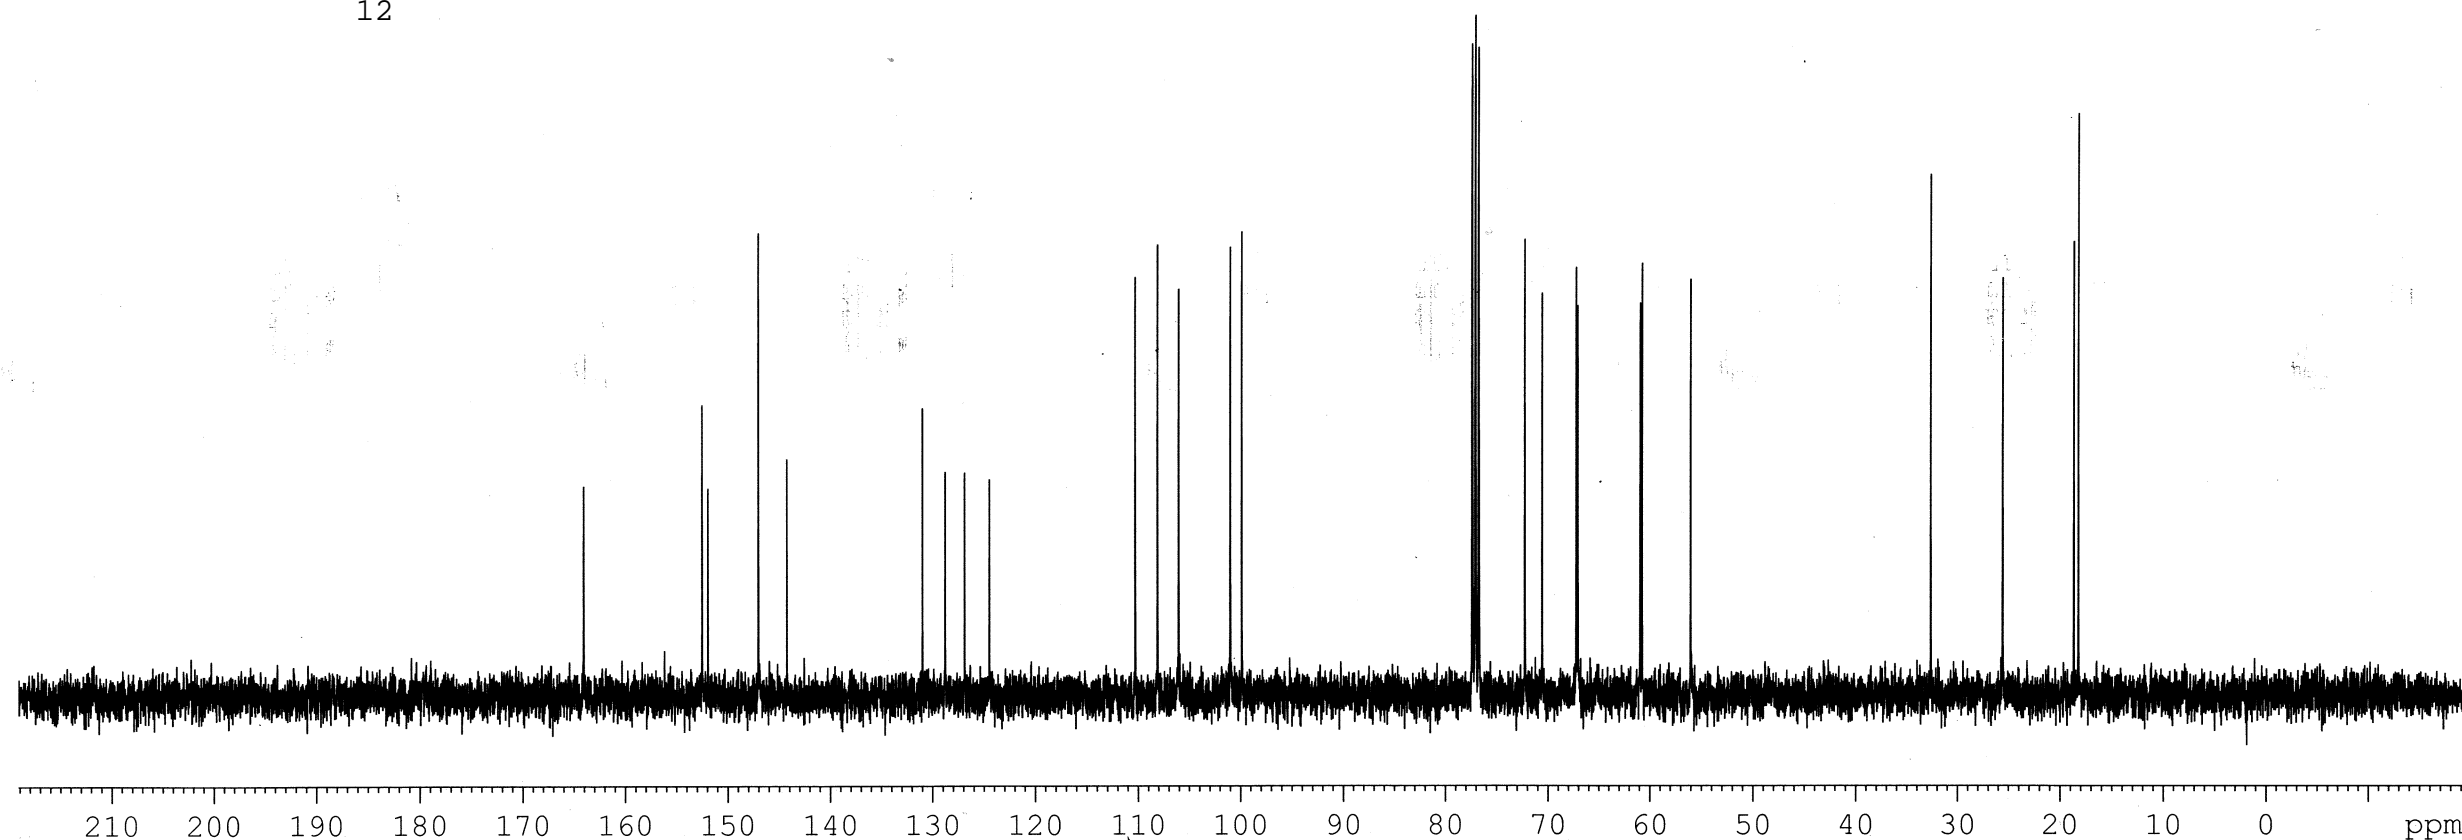

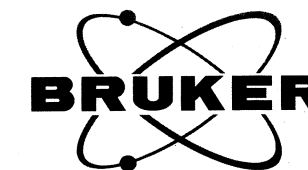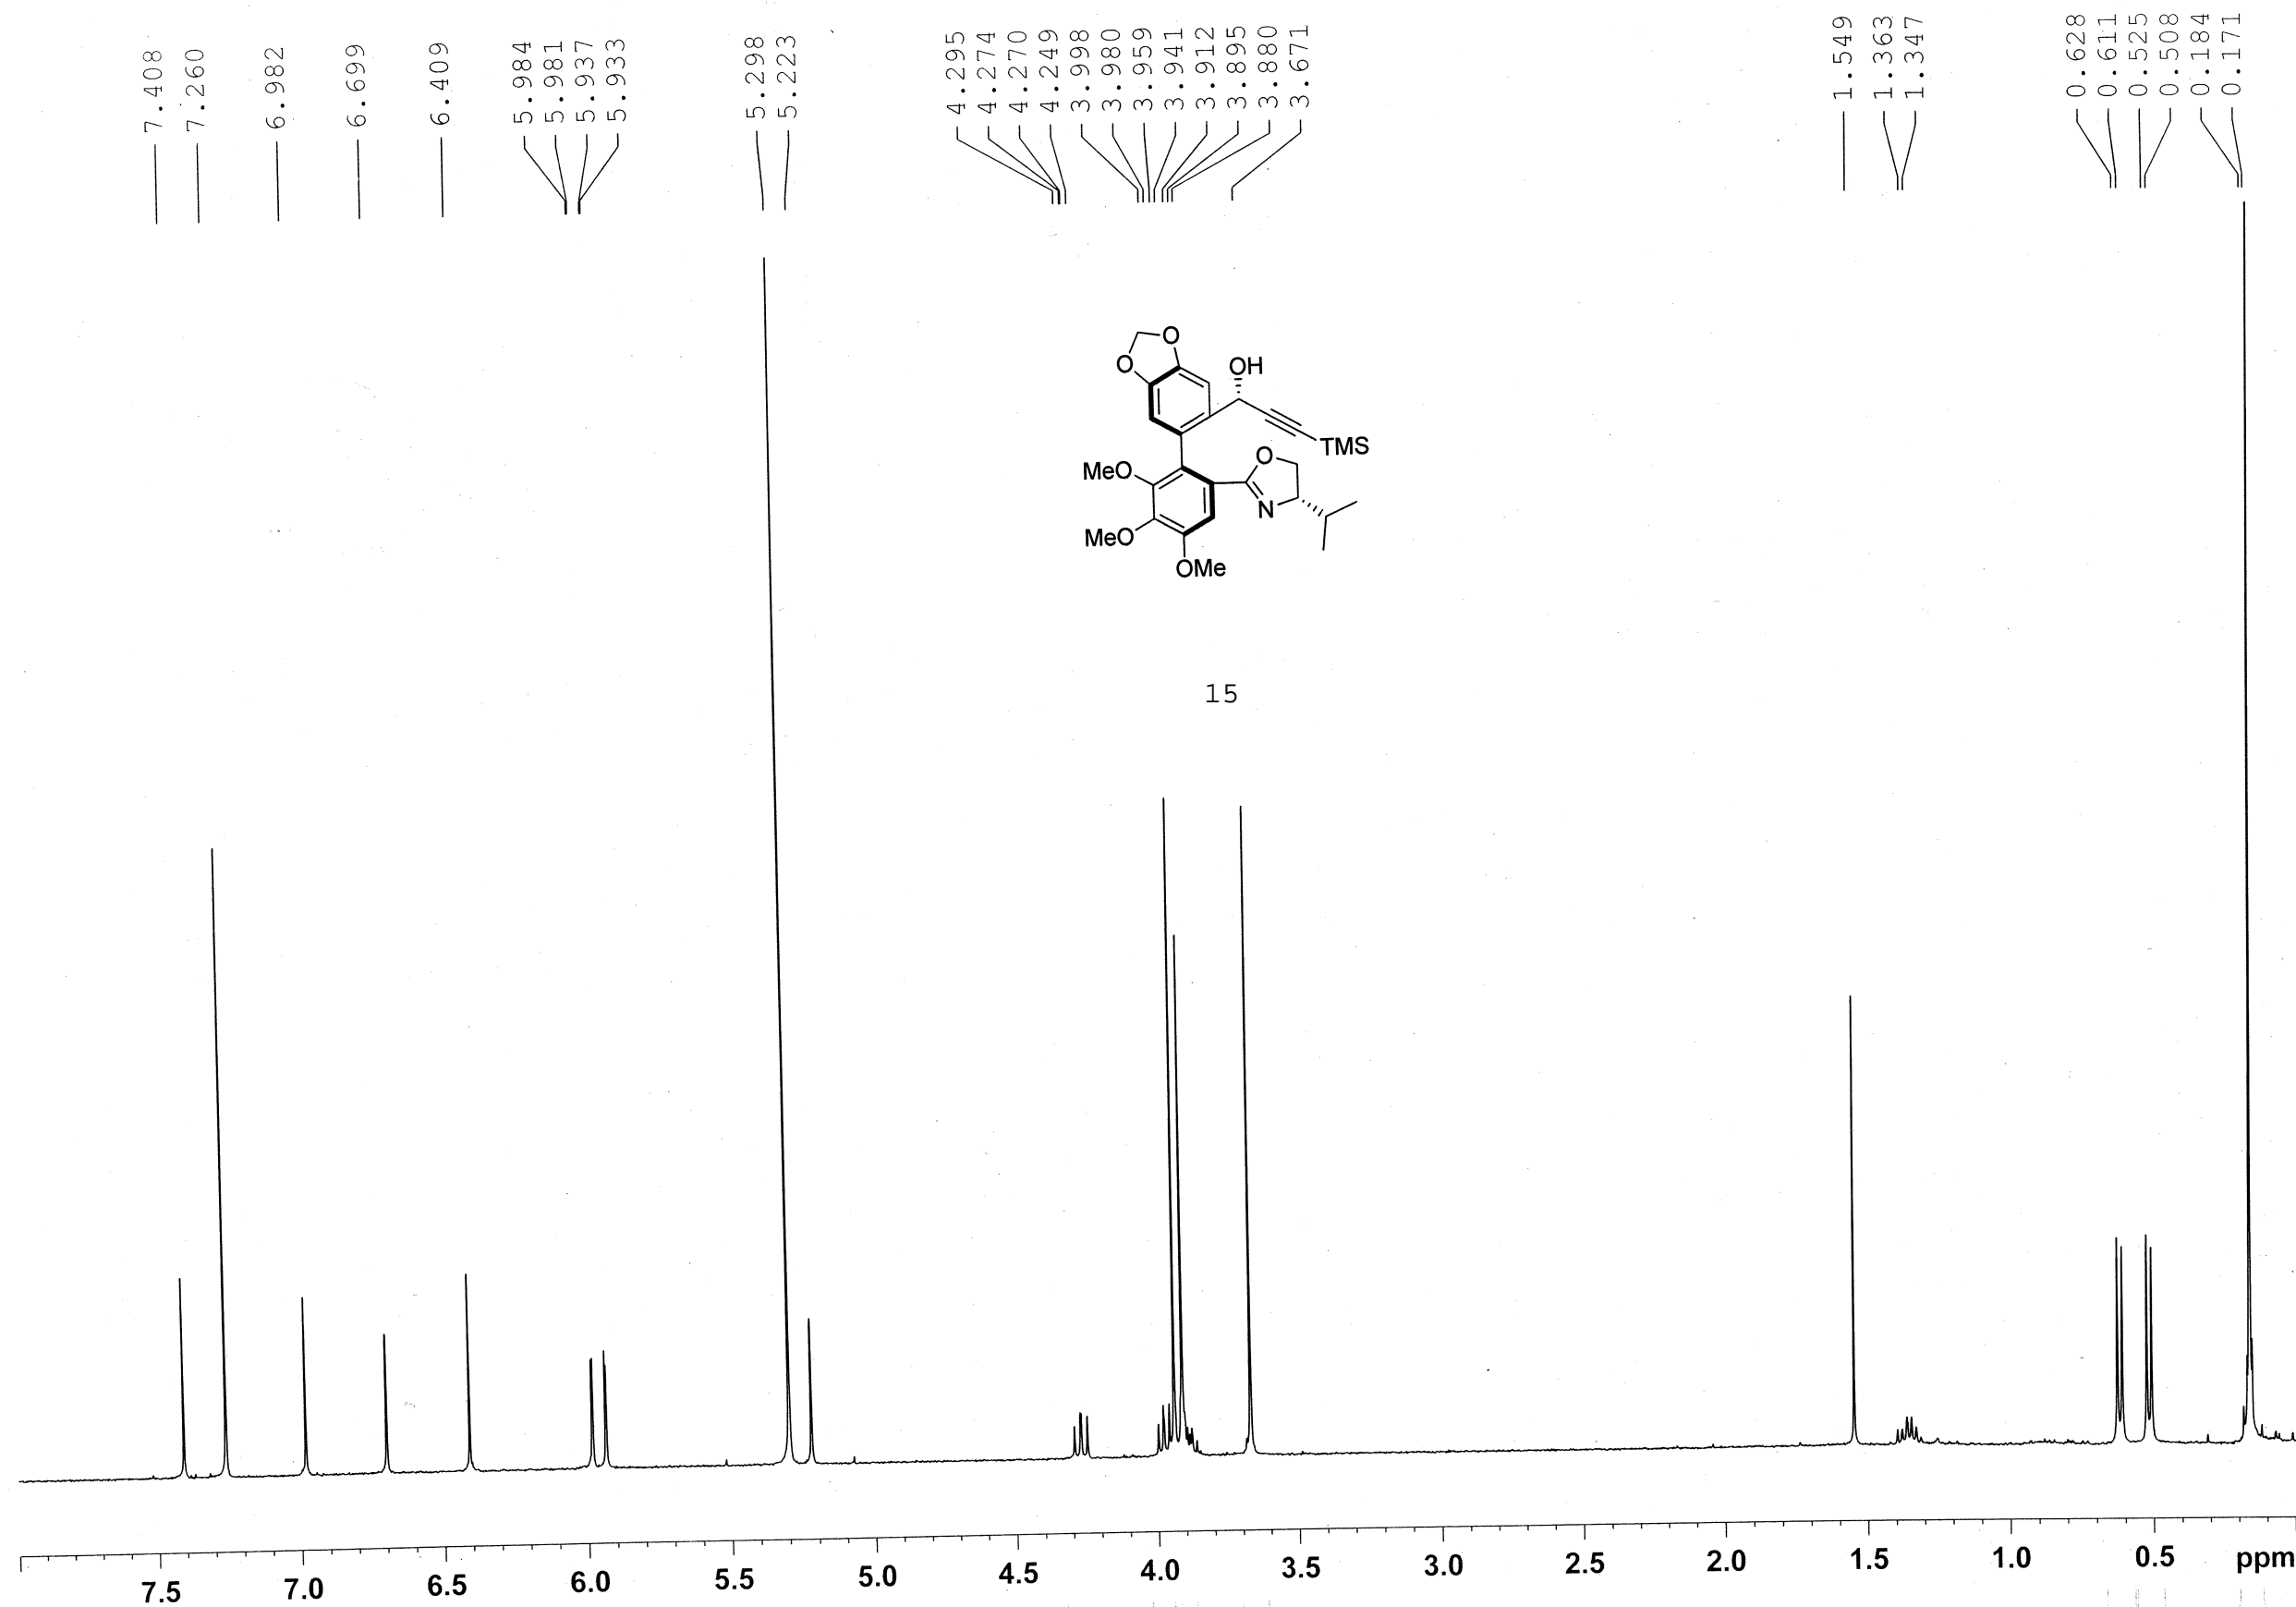

Current Data Parameters  
NAME Wgong-I-109  
EXPNO 1  
PROCNO 1

F2 - Acquisition Parameters  
Date\_ 20081218  
Time\_ 12.23  
INSTRUM spect  
PROBHD 5 mm QNP 1H/13  
PULPROG zg30  
TD 65536  
SOLVENT CDCl3  
NS 16  
DS 2  
SWH 8278.146 Hz  
FIDRES 0.126314 Hz  
AQ 3.9584243 sec  
RG 1024  
DW 60.400 usec  
DE 6.00 usec  
TE 299.2 K  
D1 1.00000000 sec  
MCREST 0.00000000 sec  
MCWRK 0.01500000 sec

===== CHANNEL f1 =====  
NUC1 1H  
P1 13.00 usec  
PL1 0.00 dB  
SFO1 400.1324710 MHz

F2 - Processing parameters  
SI 32768  
SF 400.130096 MHz  
WDW EM  
SSB 0  
LB 0.30 Hz  
GB 0  
PC 1.40

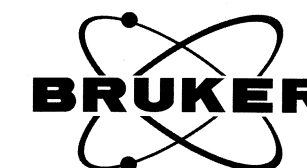

Current Data Parameters  
NAME .Wgong-I-103 C13  
EXPNO 413  
PROCNO 1

F2 - Acquisition Parameters  
Date\_ 20110305  
Time 11.11  
INSTRUM spect  
PROBHD 5 mm QNP 1H/13  
PULPROG zgpg30  
TD 65536  
SOLVENT CDCl3  
NS 337  
DS 4  
SWH 23980.814 Hz  
FIDRES 0.365918 Hz  
AQ 1.3664756 sec  
RG 4096  
DW 20.850 usec  
DE 6.00 usec  
TE 300.2 K  
D1 2.00000000 sec  
d11 0.03000000 sec  
DELTA 1.89999998 sec  
TD0 1

===== CHANNEL f1 =====  
NUC1 13C  
P1 10.50 usec  
PL1 0.00 dB  
SFO1 100.6228298 MHz

===== CHANNEL f2 =====  
CPDPRG2 waltz16  
NUC2 1H  
PCPD2 80.00 usec  
PL2 -6.00 dB  
PL12 14.56 dB  
PL13 16.50 dB  
SFO2 400.1316005 MHz

F2 - Processing parameters  
SI 32768  
SF 100.6127690 MHz  
WDW EM  
SSB 0  
LB 1.00 Hz  
GB 0  
PC 1.40

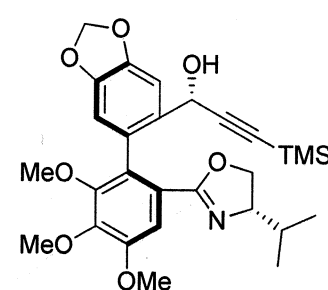

15

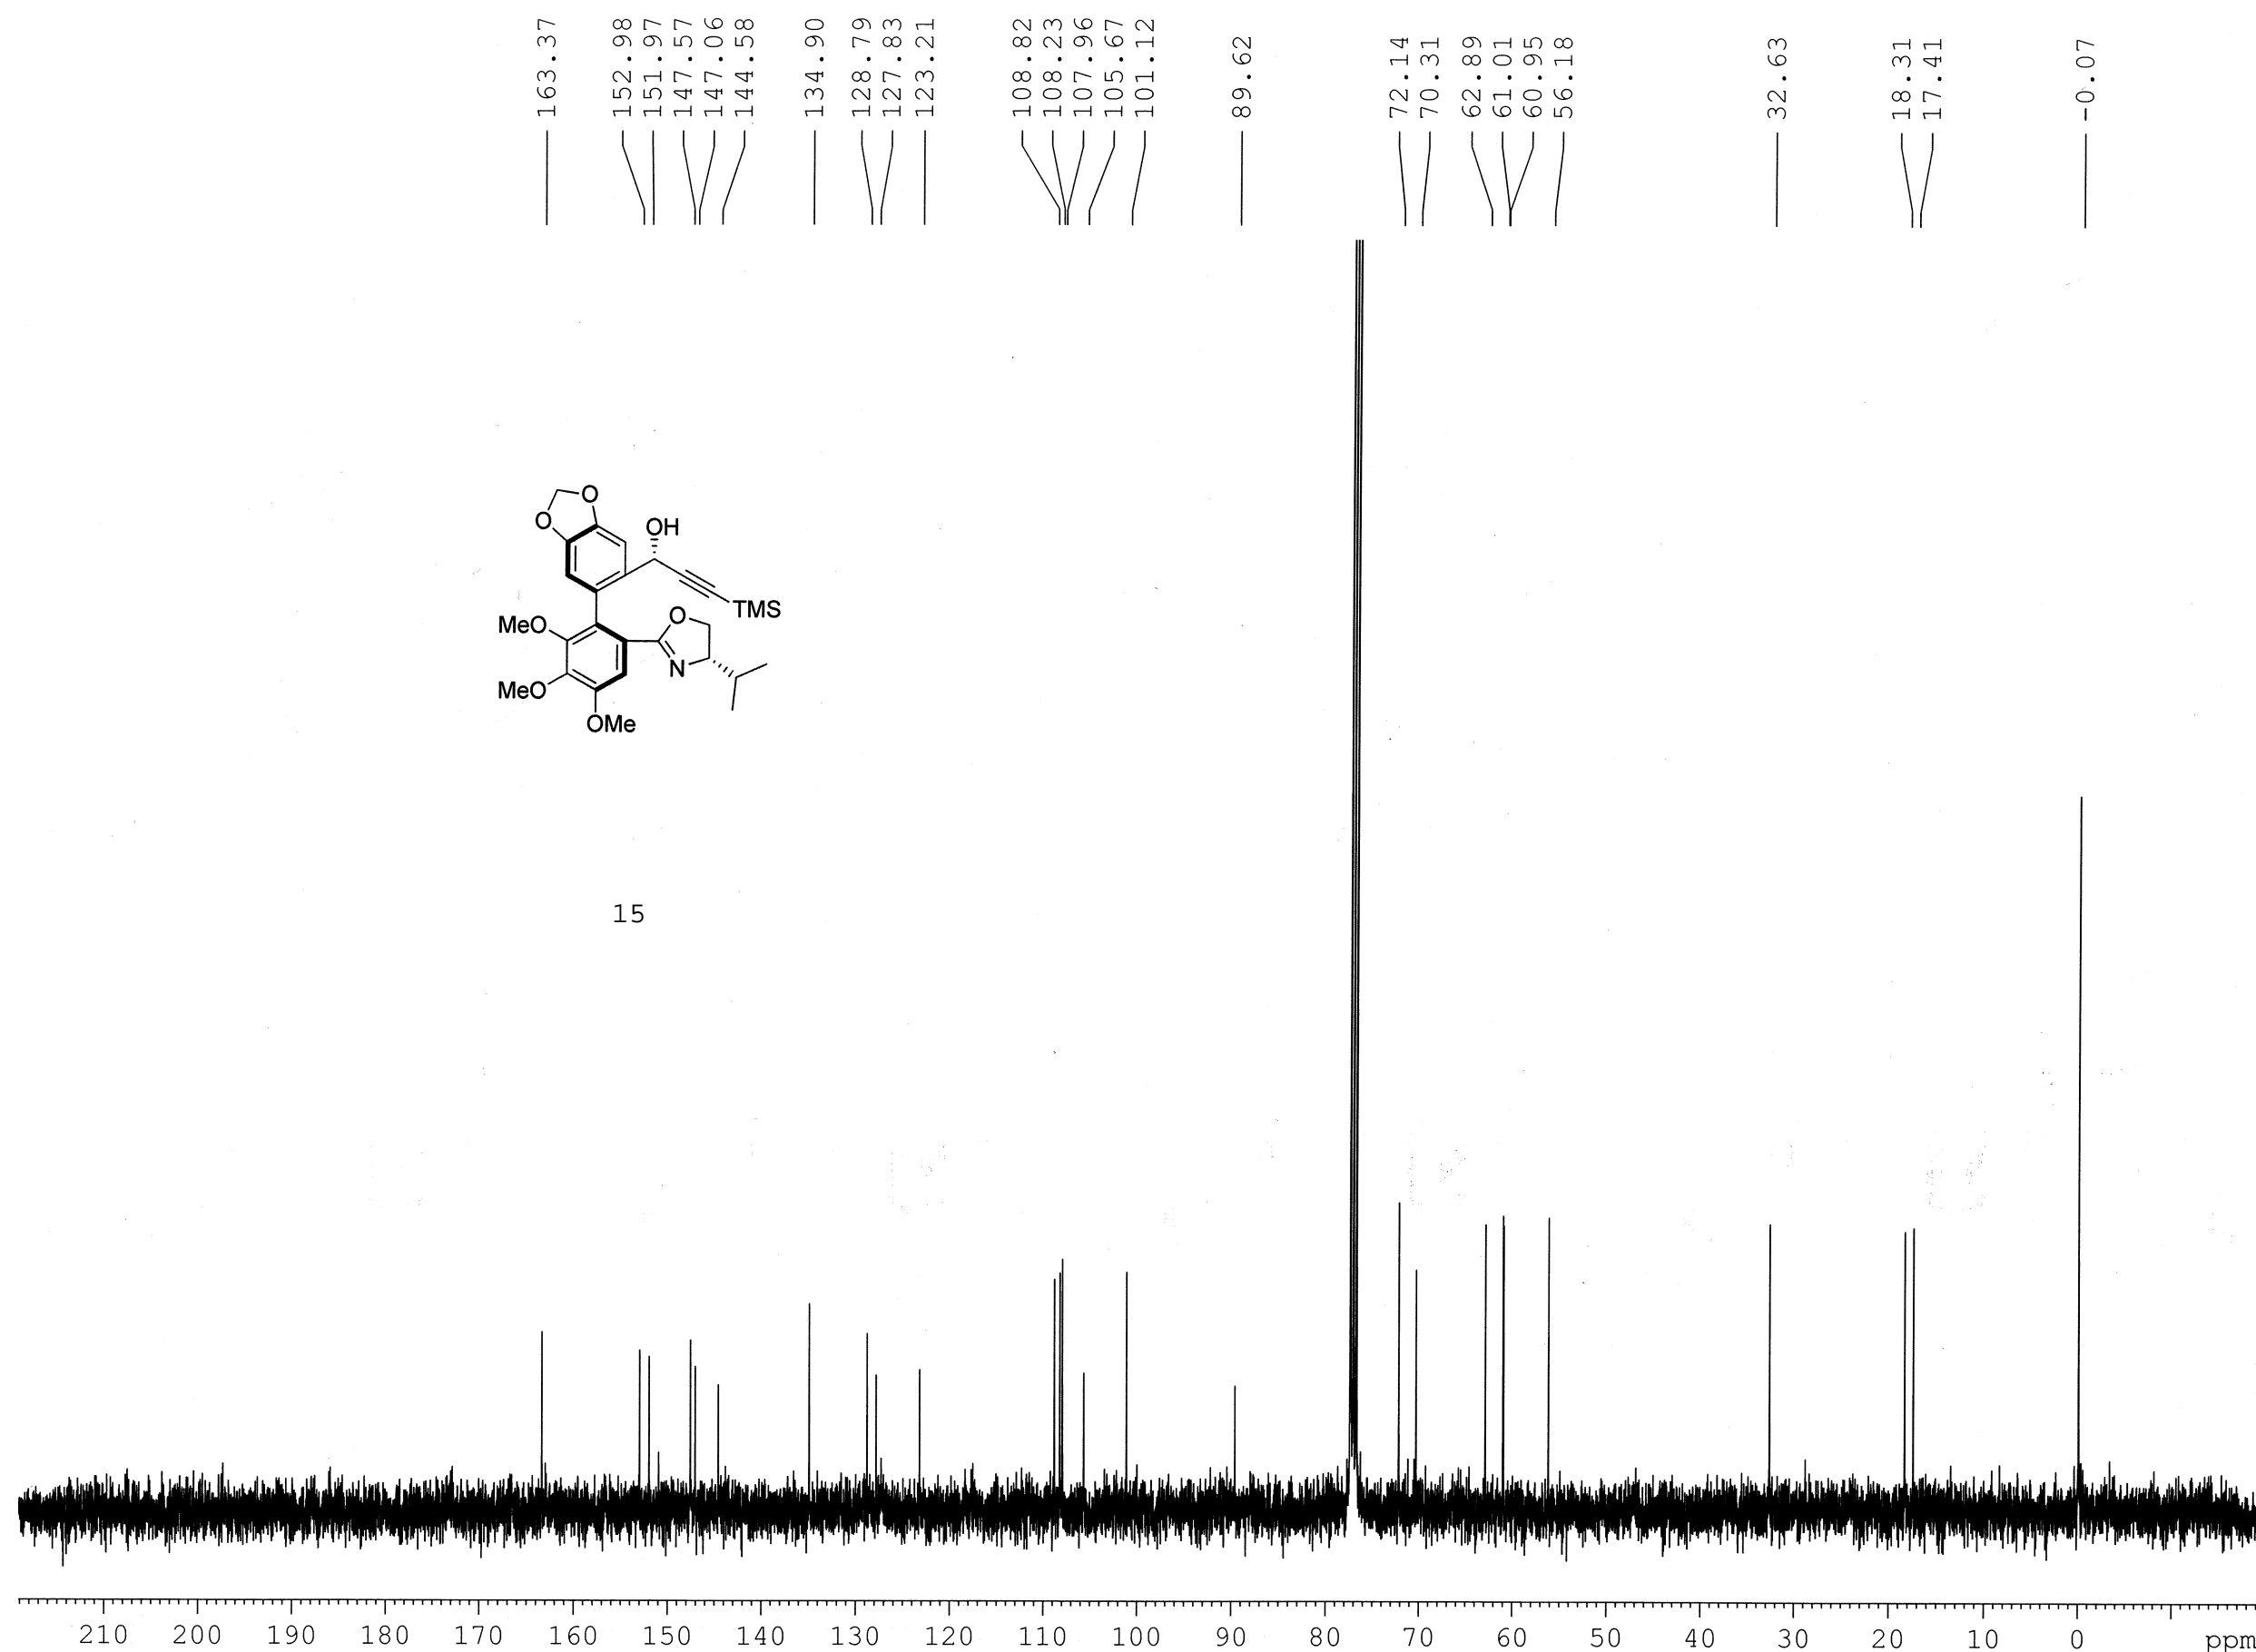



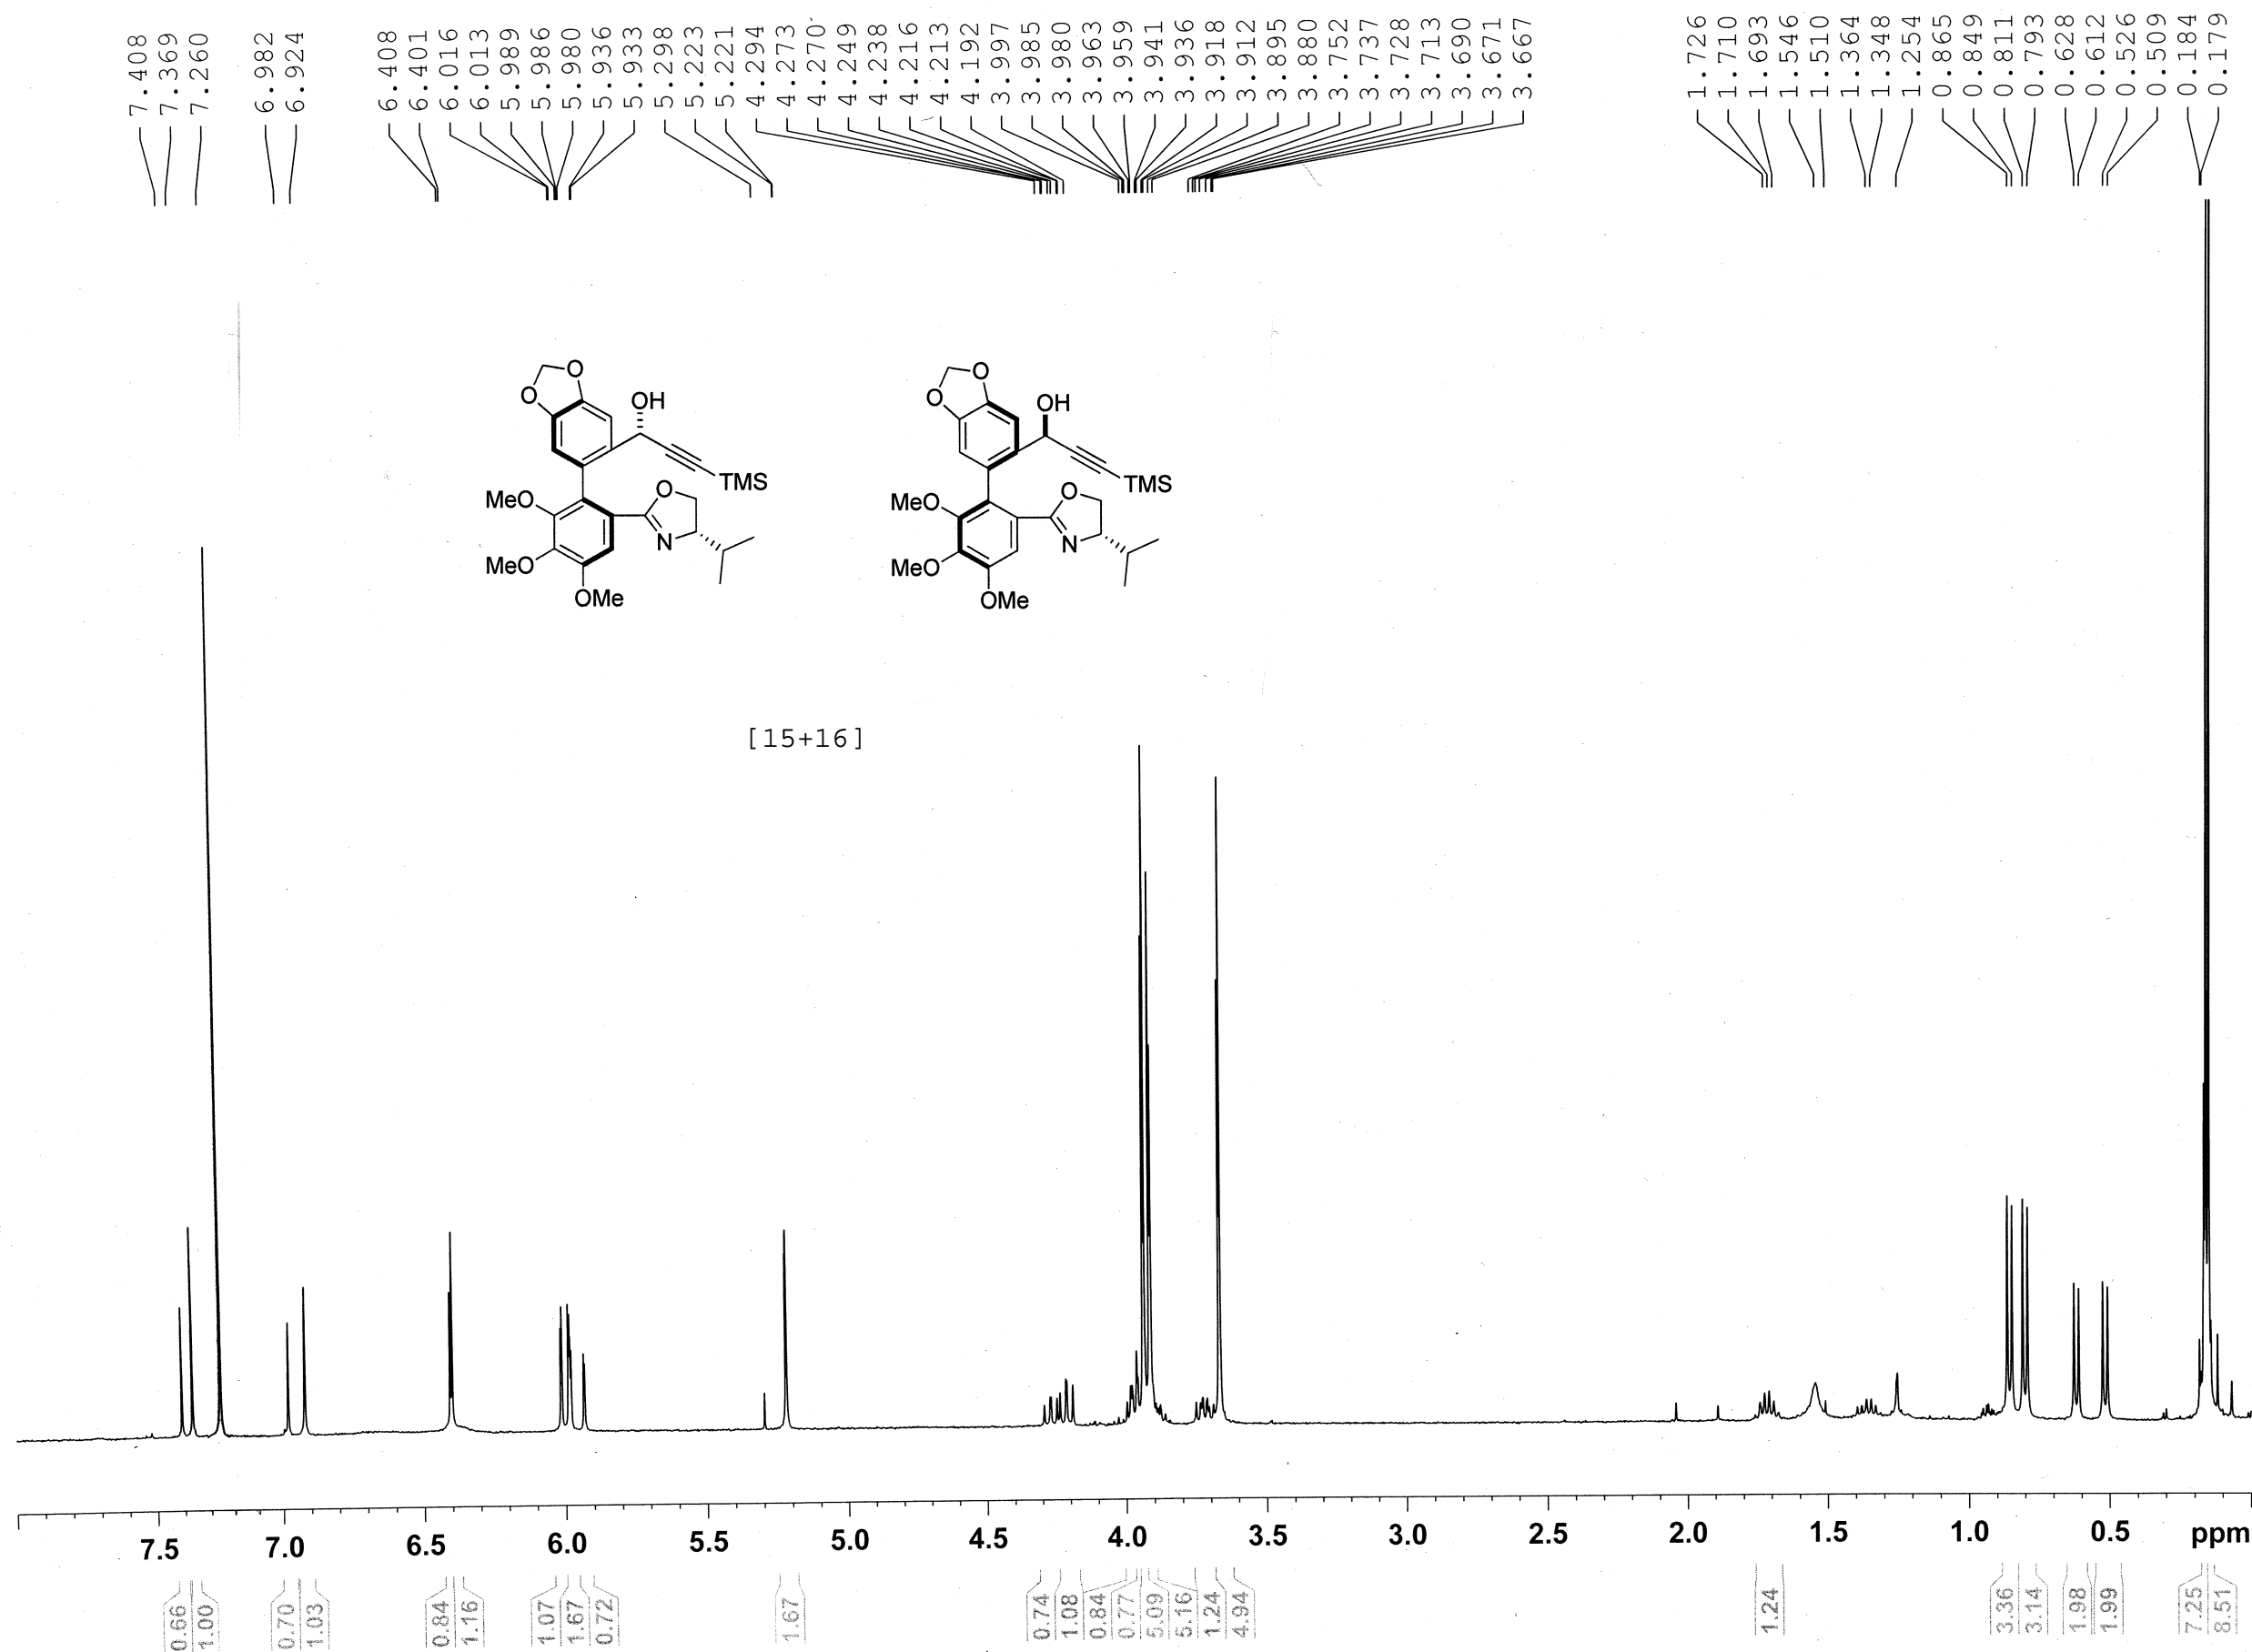

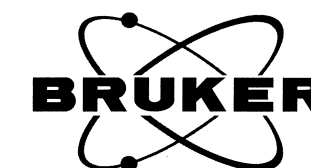

Current Data Parameters  
NAME Wgong-II-44 C13  
EXPNO 422  
PROCNO 1

F2 - Acquisition Parameters  
Date\_ 20110310  
Time\_ 8.32  
INSTRUM spect  
PROBHD 5 mm QNP 1H/13  
PULPROG zgpg30  
TD 65536  
SOLVENT CDC13  
NS 483  
DS 4  
SWH 23980.814 Hz  
FIDRES 0.365918 Hz  
AQ 1.3664756 sec  
RG 5160.6  
DW 20.850 usec  
DE 6.00 usec  
TE 300.2 K  
D1 2.00000000 sec  
d11 0.03000000 sec  
DELTA 1.89999998 sec  
TD0 1

===== CHANNEL f1 =====  
NUC1 13C  
P1 10.50 usec  
PL1 0.00 dB  
SFO1 100.6228298 MHz

===== CHANNEL f2 =====  
CPDPRG2 waltz16  
NUC2 1H  
PCPD2 80.00 usec  
PL2 -6.00 dB  
PL12 14.56 dB  
PL13 16.50 dB  
SFO2 400.1316005 MHz

F2 - Processing parameters  
SI 32768  
SF 100.6127677 MHz  
WDW EM  
SSB 0  
LB 1.00 Hz  
GB 0  
PC 1.40

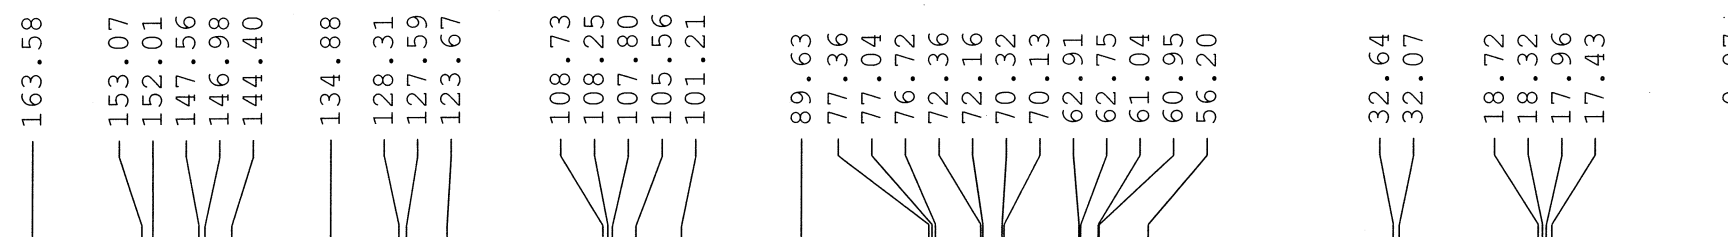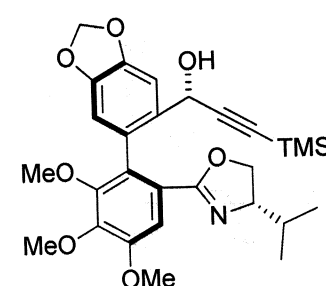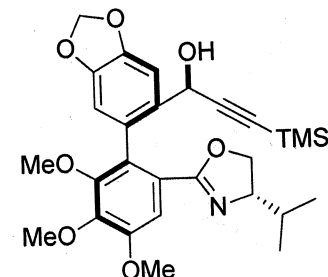

[15+16] 13C

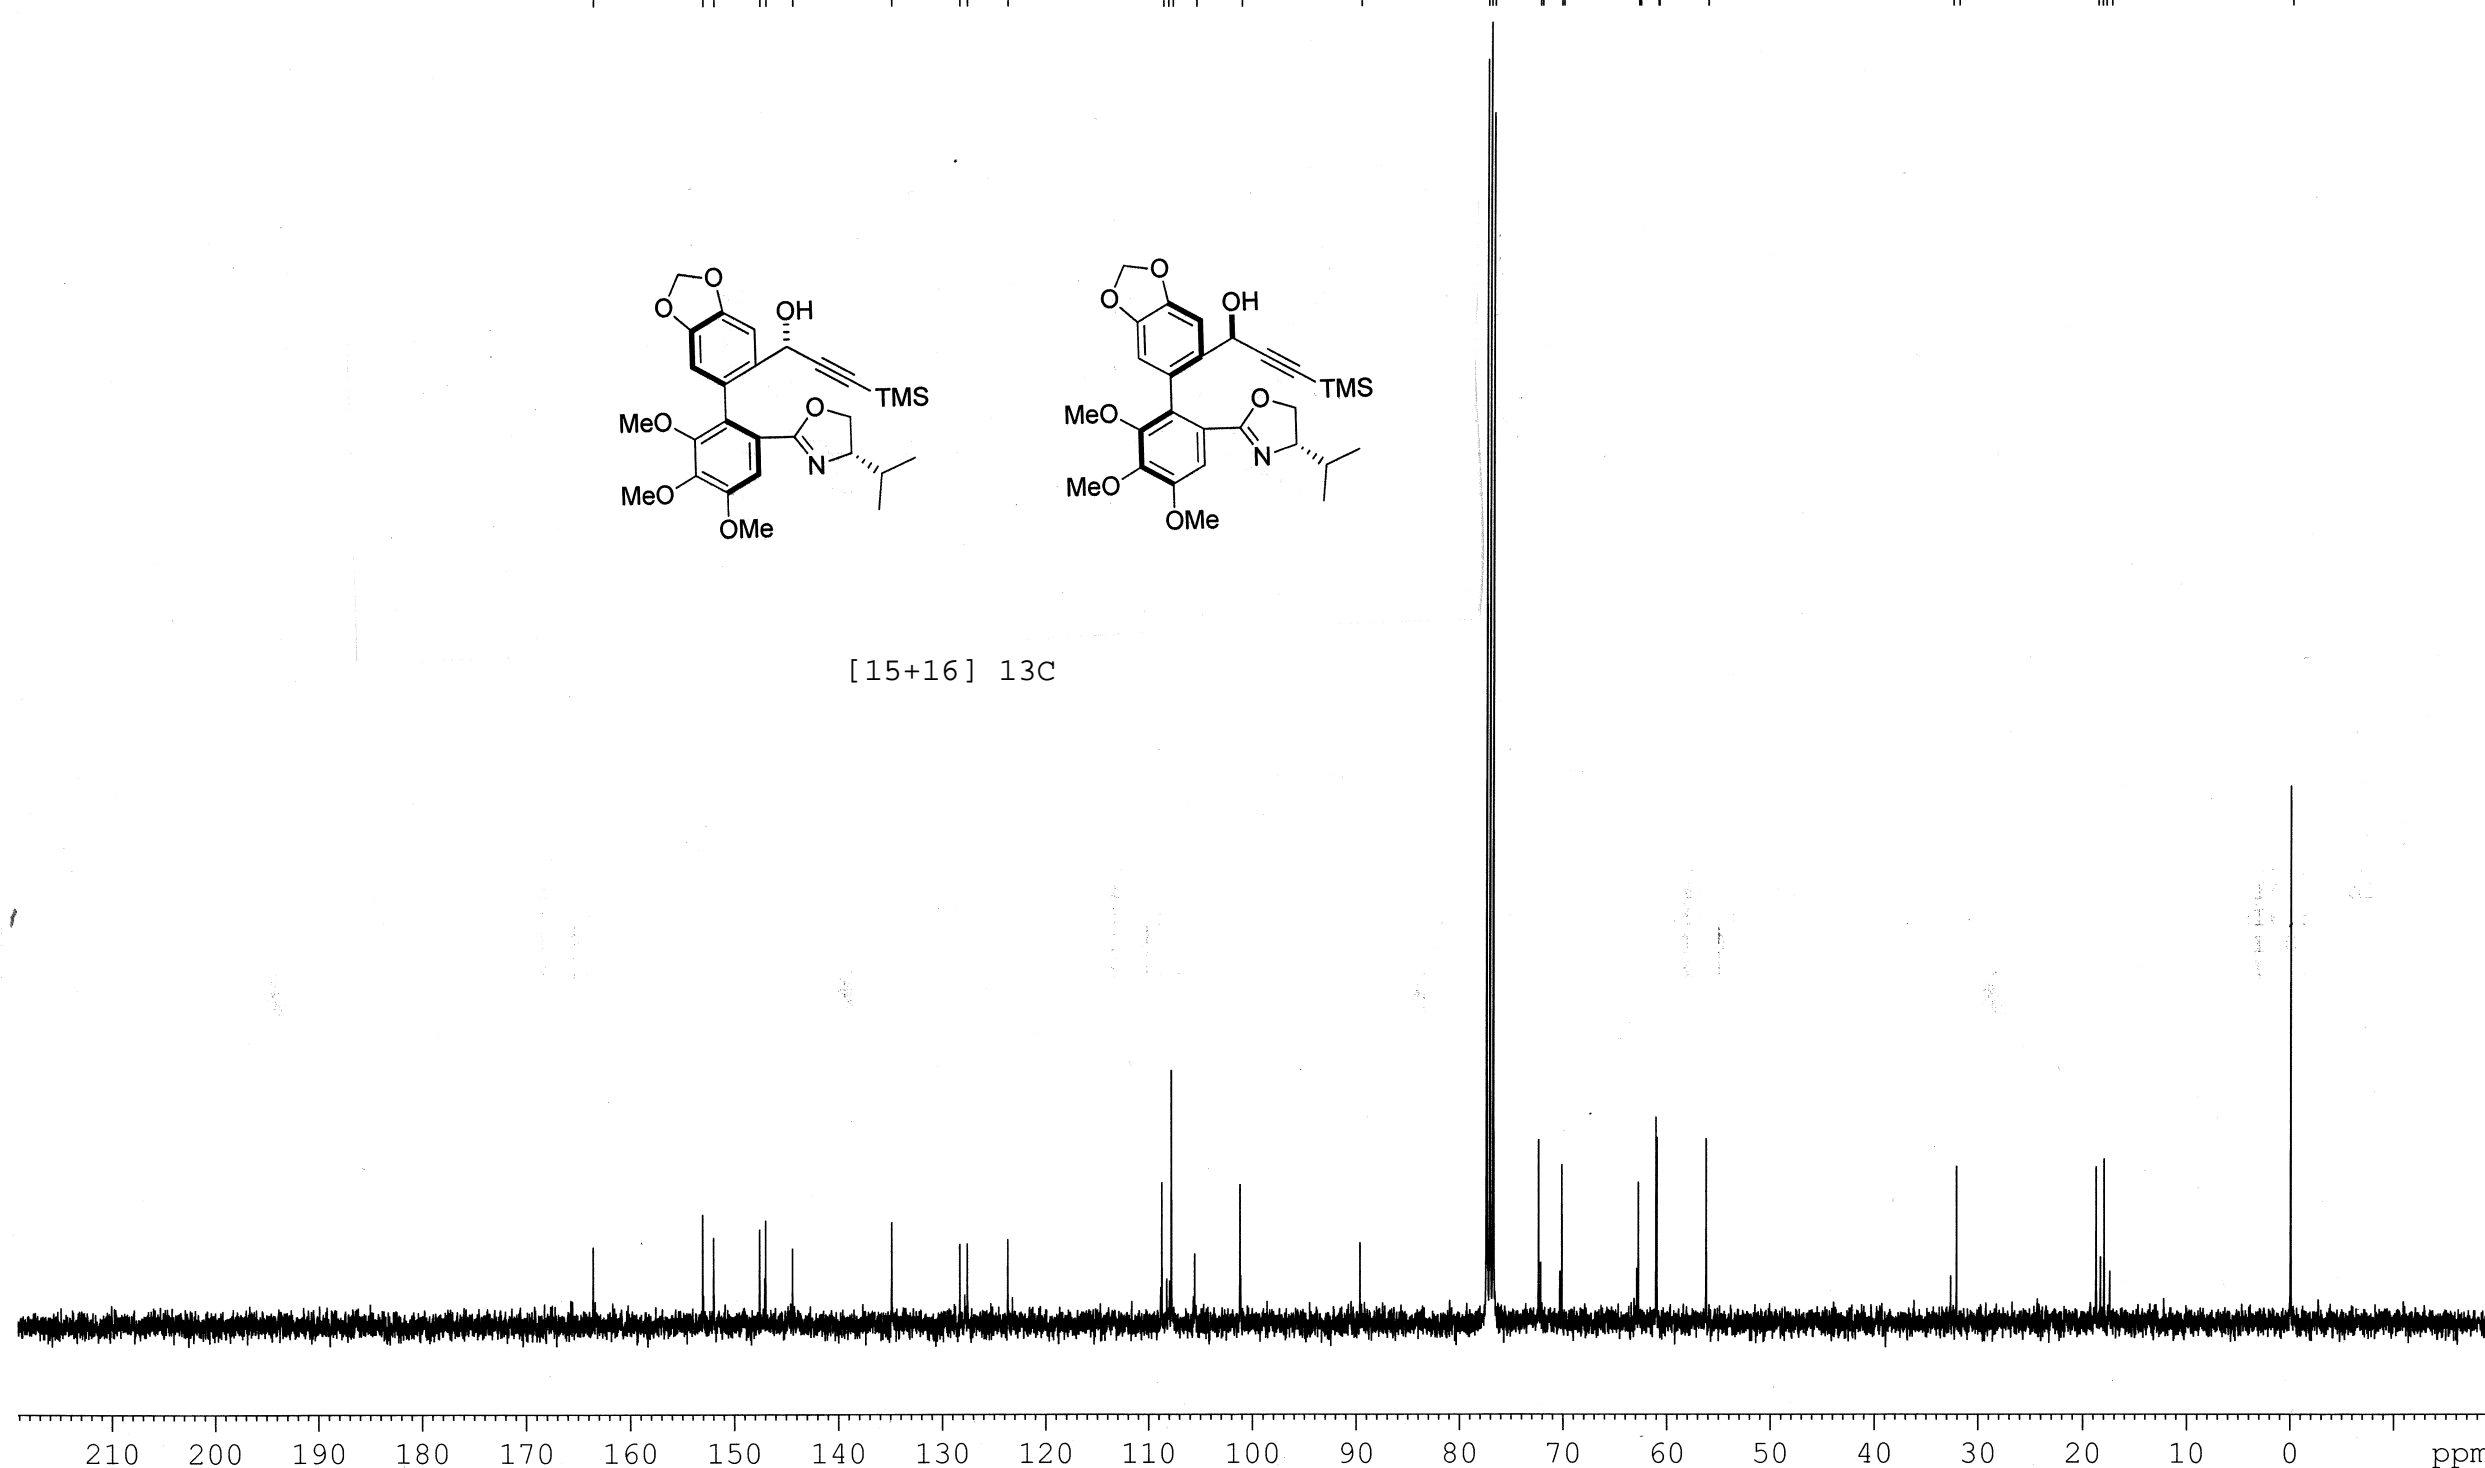

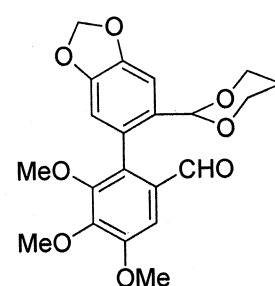

[17]

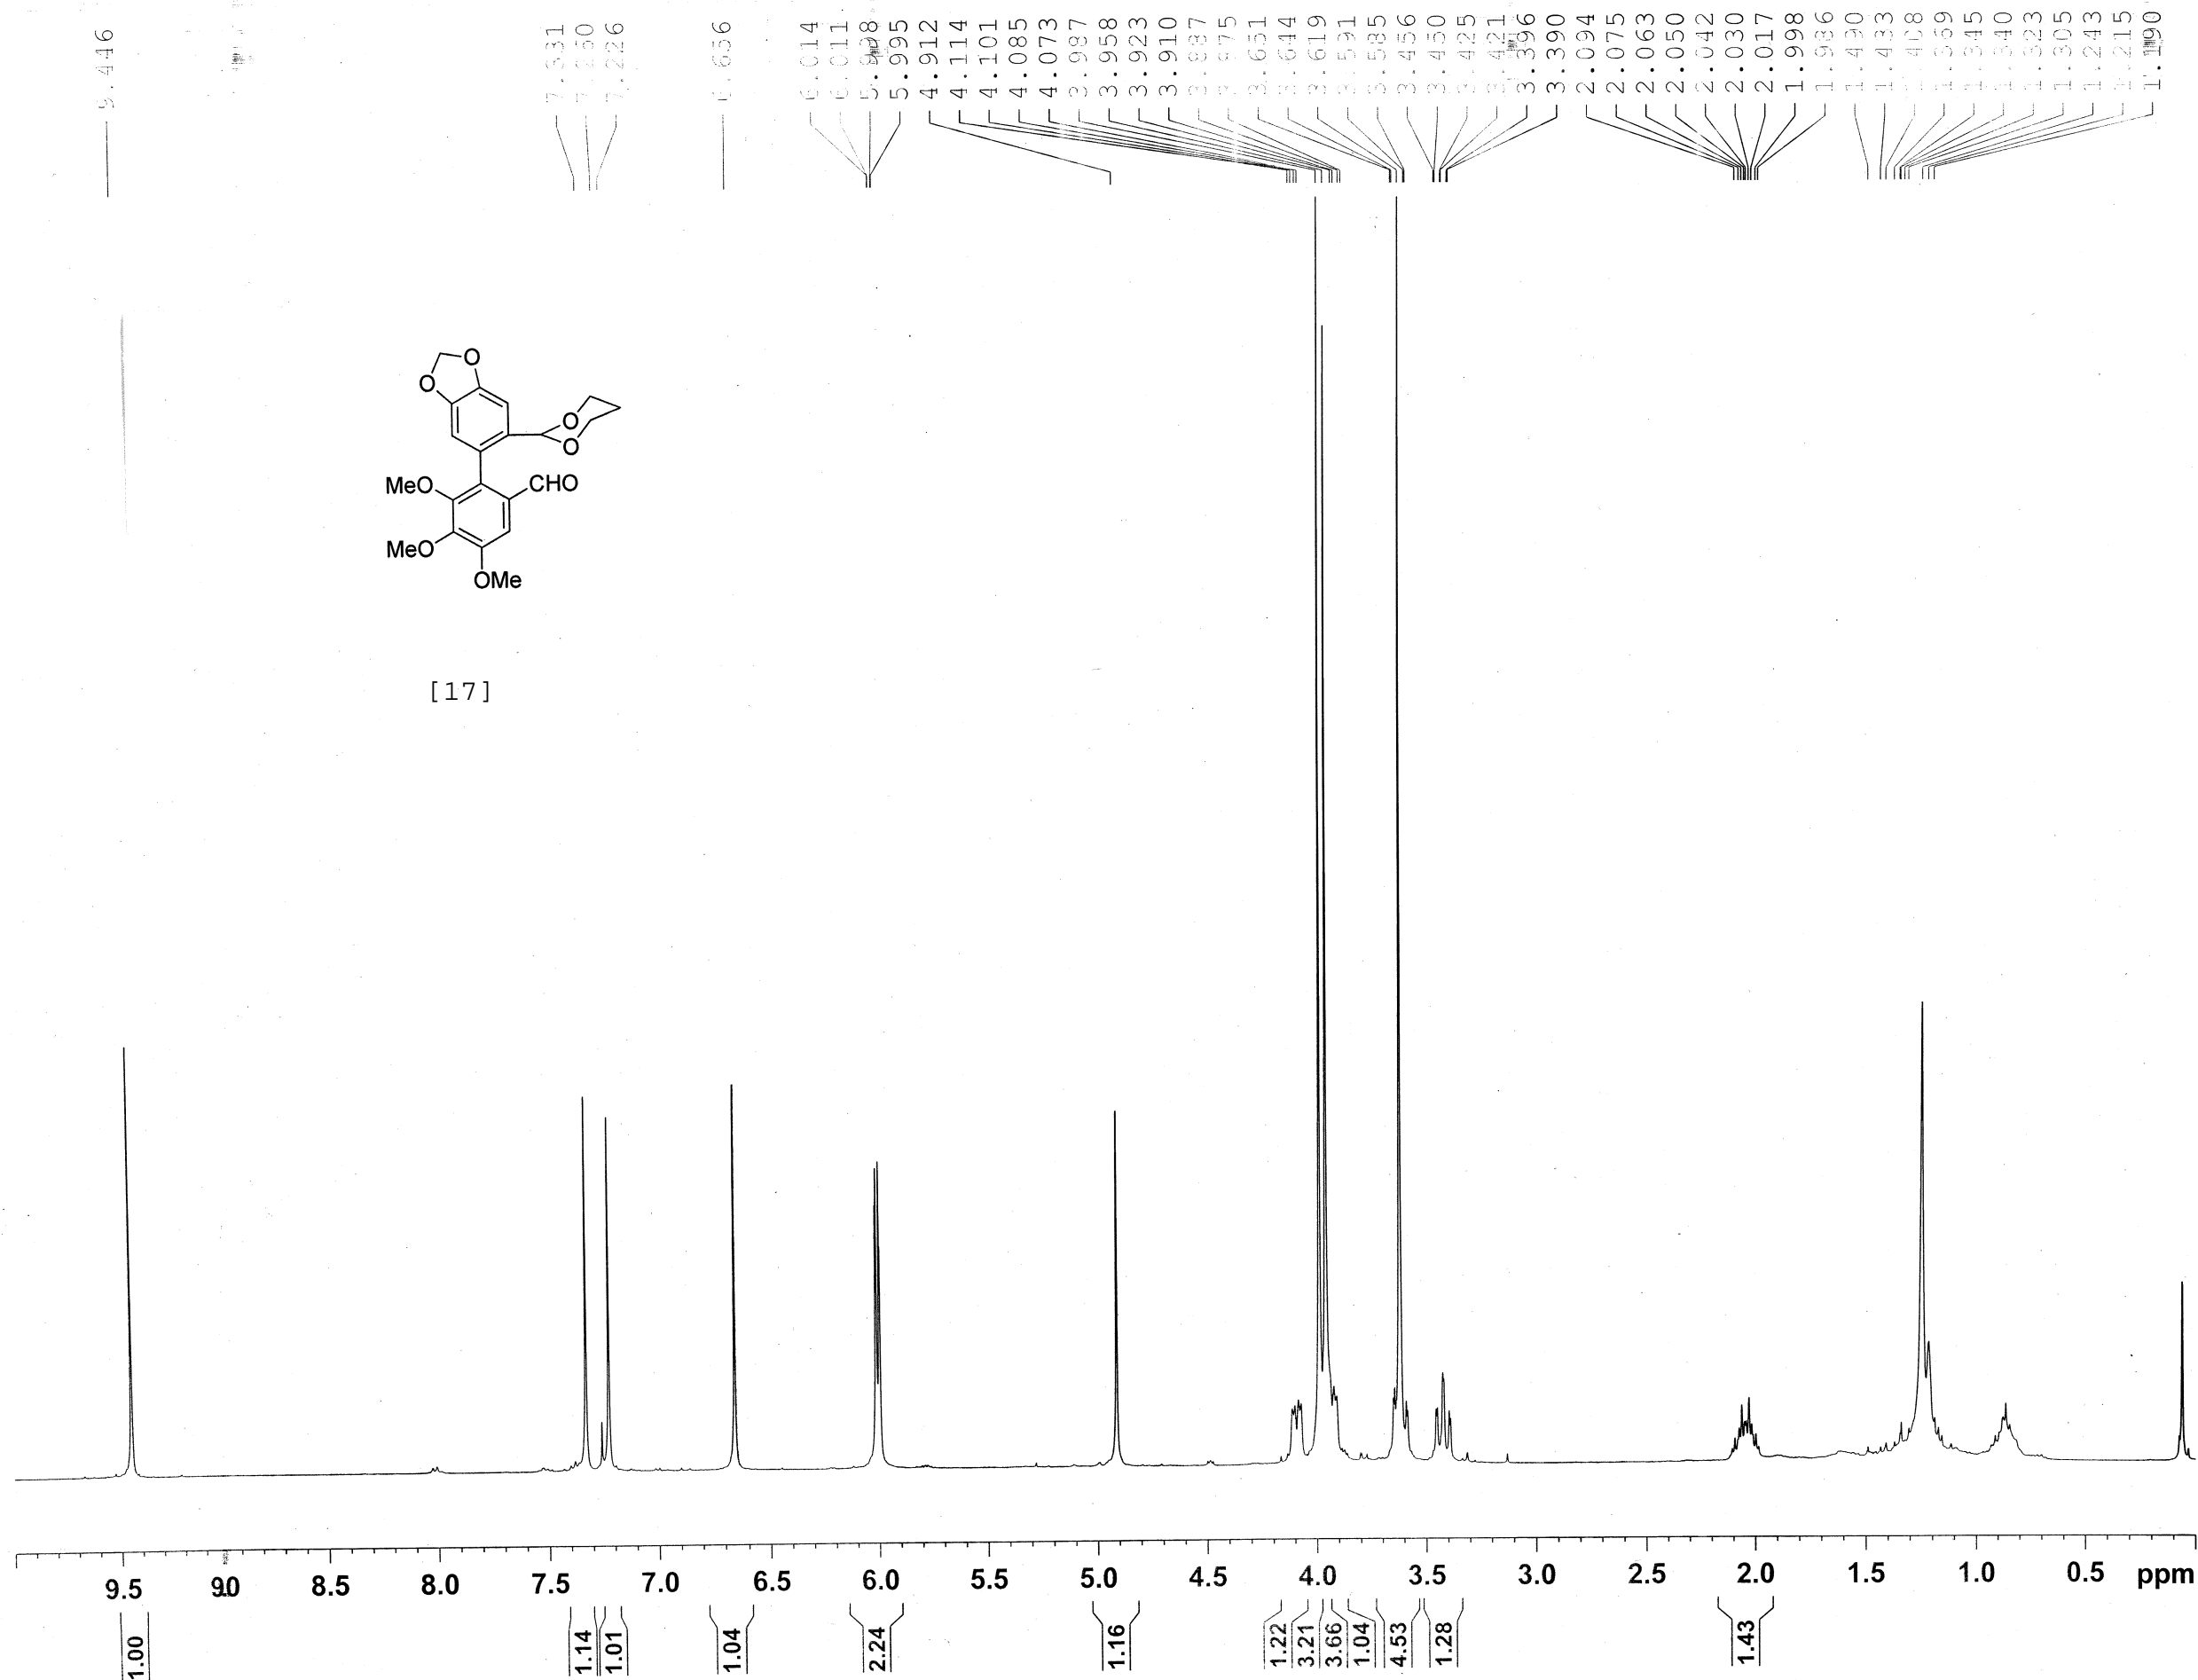

The Ohio State University  
Department of Chemistry  
NMR Facility  
400MHz - 0083

Current Data Parameters  
NAME Wgong-I-261  
EXPNO 1  
PROCNO 1

F2 - Acquisition Parameters  
Date\_ 20091020  
Time 13.38  
INSTRUM spect  
PROBHD 5 mm QNP 1H/13  
PULPROG zg30  
TD 65536  
SOLVENT CDCl<sub>3</sub>  
NS 16  
DS 2  
SWH 8278.146 Hz  
FIDRES 0.126314 Hz  
AQ 3.9584243 sec  
RG 50.8  
DW 60.400 usec  
DE 6.00 usec  
TE 300.2 K  
D1 1.00000000 sec  
TD0 1

===== CHANNEL f1 =====  
NUC1 1H  
P1 13.00 usec  
PL1 0.00 dB  
SFO1 400.1324710 MHz

F2 - Processing parameters  
SI 32768  
SF 400.1300096 MHz  
WDW EM  
SSB 0  
LB 0.30 Hz  
GB 0  
PC 1.00

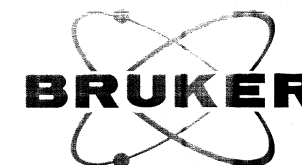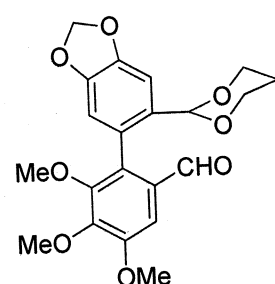

[17]

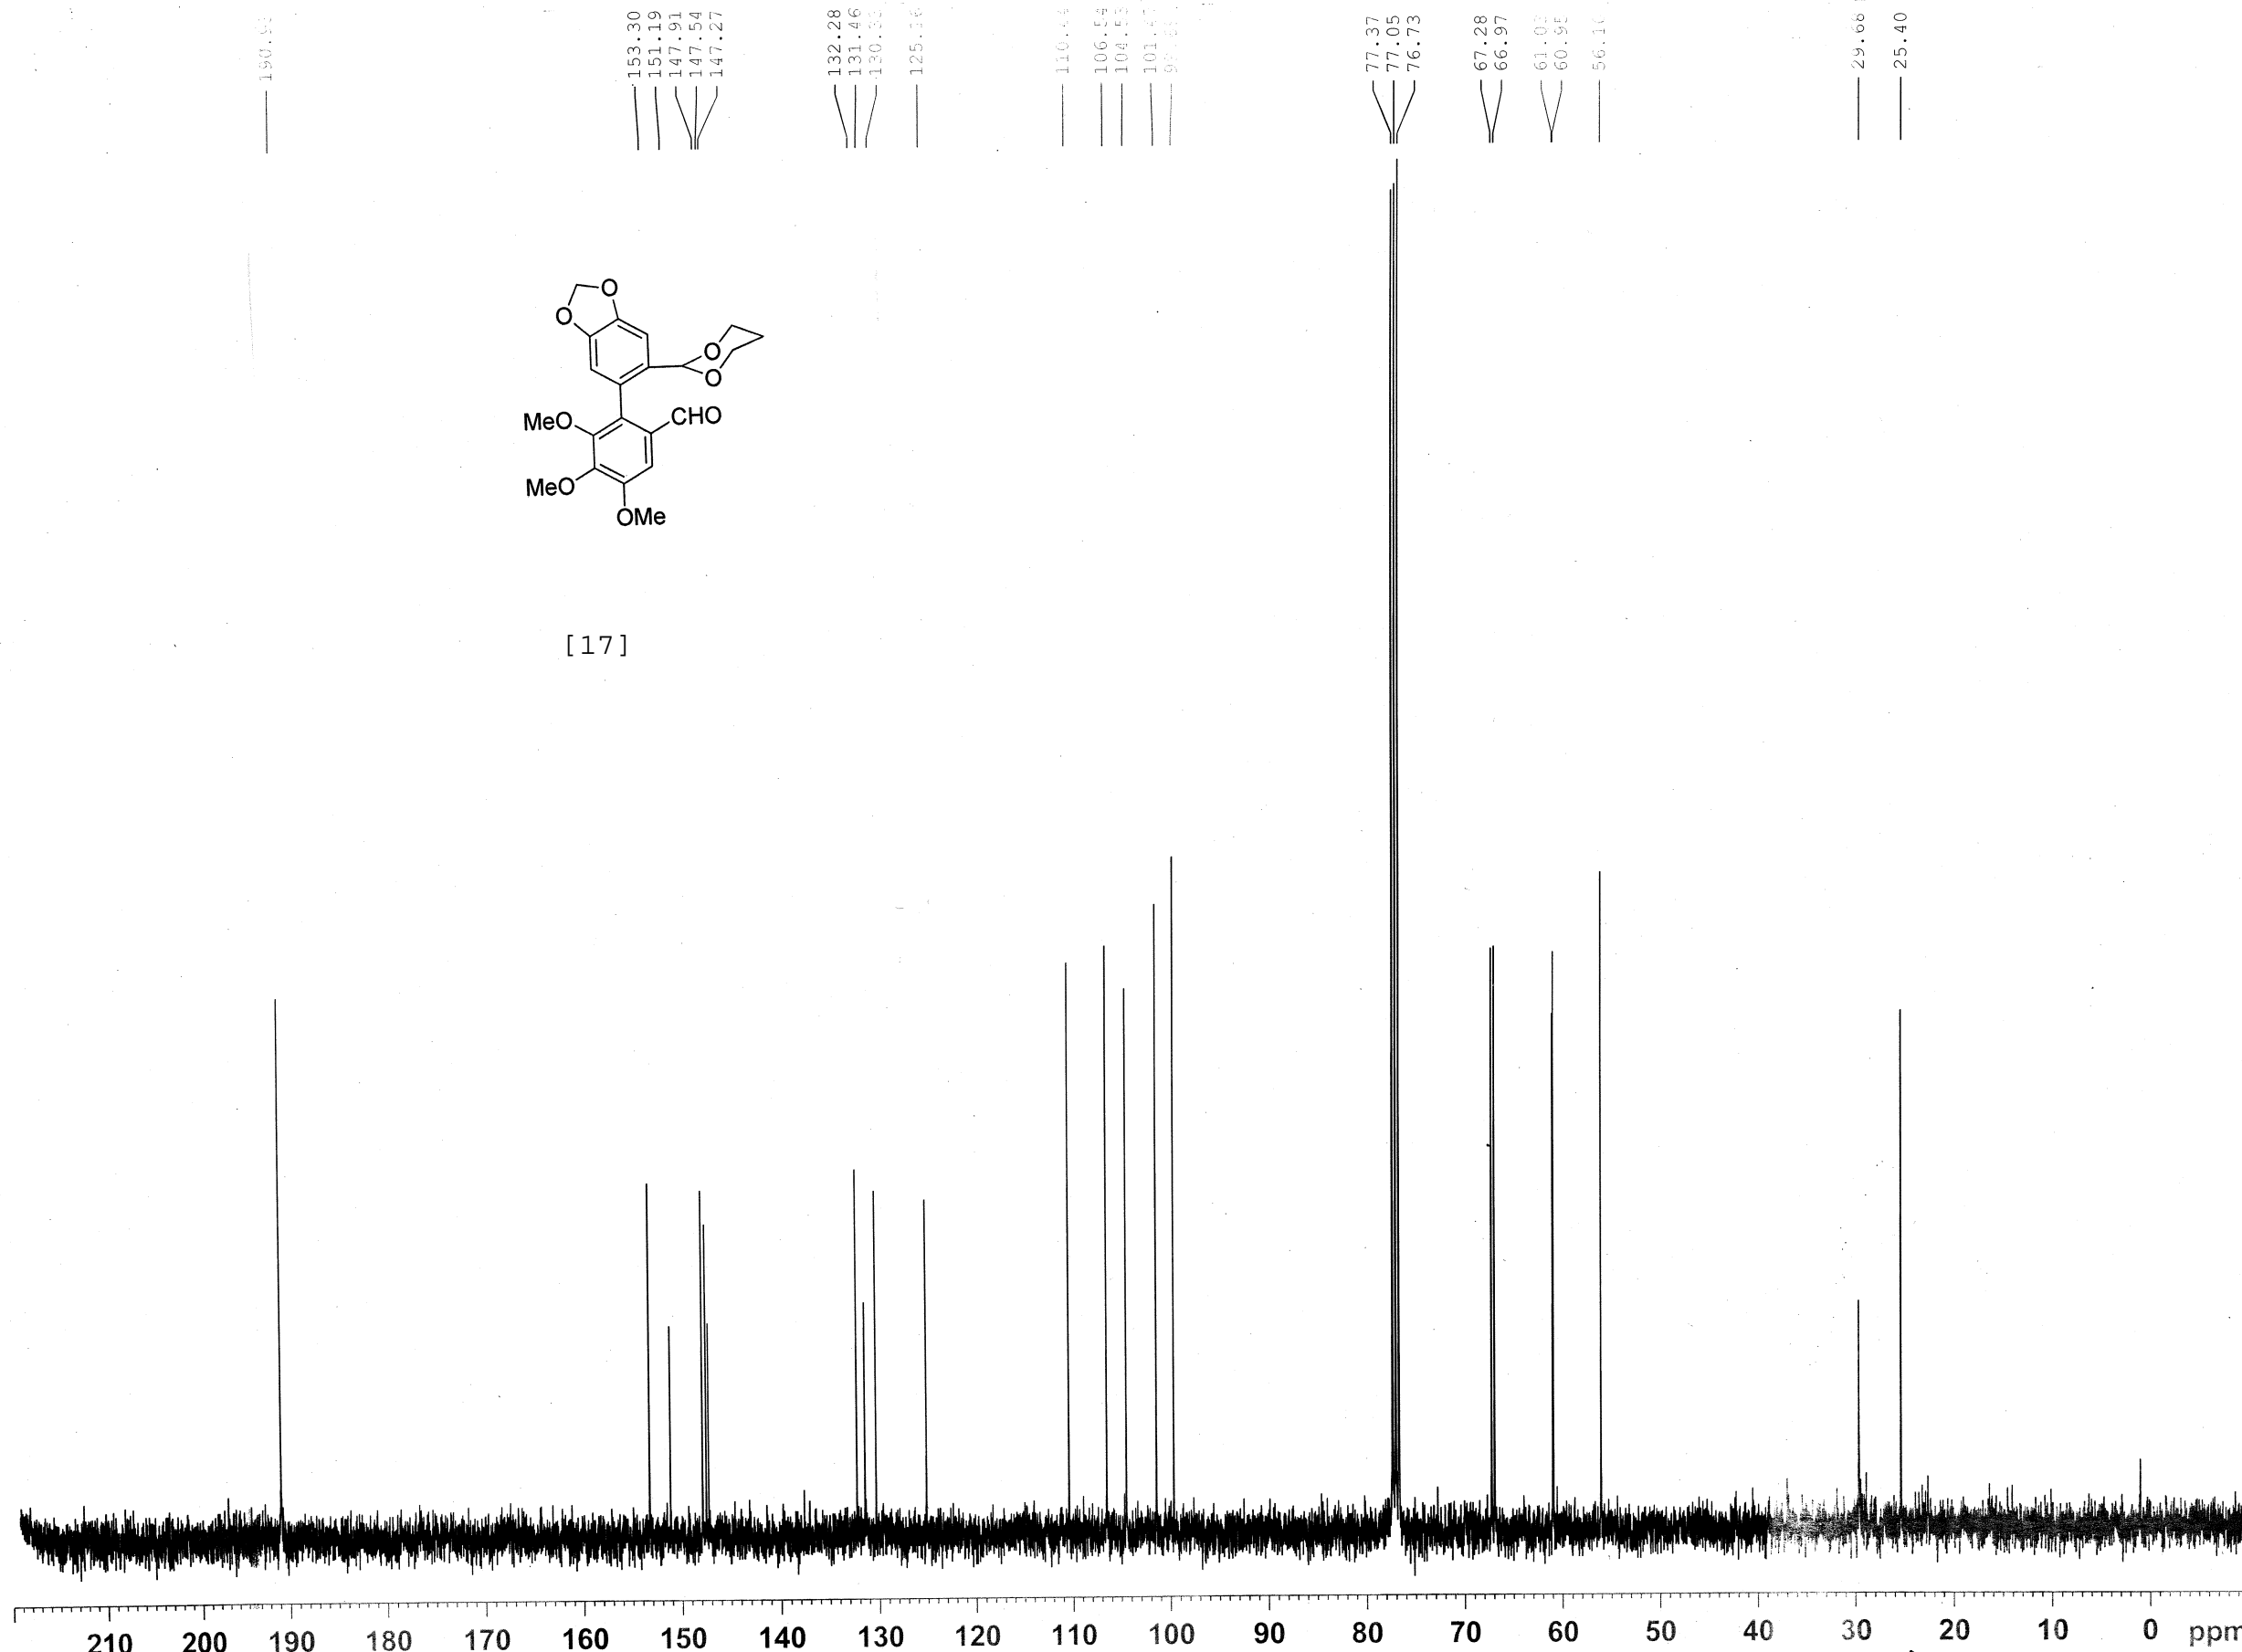

Current Data Parameters  
NAME Wgong-I-261 C13  
EXPNO 1  
PROCNO 1

F2 - Acquisition Parameters  
Date\_ 20091020  
Time\_ 13.50  
INSTRUM spect  
PROBHD 5 mm QNP 1H/13  
PULPROG zgpg30  
TD 65536  
SOLVENT CDCl<sub>3</sub>  
NS 137  
DS 4  
SWH 23980.814 Hz  
FIDRES 0.365918 Hz  
AQ 1.3664756 sec  
RG 2048  
DW 20.850 usec  
DE 6.00 usec  
TE 300.2 K  
D1 2.00000000 sec  
d11 0.03000000 sec  
DELTA 1.89999998 sec  
TD0 1

===== CHANNEL f1 =====  
NUC1 13C  
P1 10.50 usec  
PL1 0.00 dB  
SFO1 100.6228298 MHz

===== CHANNEL f2 =====  
CPDPRG2 waltz16  
NUC2 1H  
PCPD2 80.00 usec  
PL2 -6.00 dB  
PL12 14.56 dB  
PL13 16.50 dB  
SFO2 400.1316005 MHz

F2 - Processing parameters  
SI 32768  
SF 100.6127690 MHz  
WDW EM  
SSB 0  
LB 1.00 Hz  
GB 0  
PC 1.00

The Ohio State University  
Department of Chemistry  
NMR Facility

Current Data Parameters  
NAME Wgong-I-274  
EXPNO 483  
PROCNO 1

F2 - Acquisition Parameters  
Date\_ 20110509  
Time\_ 15.24  
INSTRUM spect  
PROBHD 5 mm QNP 1H/13  
PULPROG zg30  
TD 65536  
SOLVENT CDCl3  
NS 16  
DS 2  
SWH 8278.146 Hz  
FIDRES 0.126314 Hz  
AQ 3.9584243 sec  
RG 101.6  
DW 60.400 usec  
DE 6.00 usec  
TE 300.2 K  
D1 1.00000000 sec  
TD0 1

===== CHANNEL f1 =====  
NUC1 1H  
P1 14.50 usec  
PL1 0.00 dB  
SFO1 400.1324710 MHz

F2 - Processing parameters  
SI 32768  
SF 400.1300095 MHz  
WDW EM  
SSB 0  
LB 0.30 Hz  
GB 0  
PC 1.00

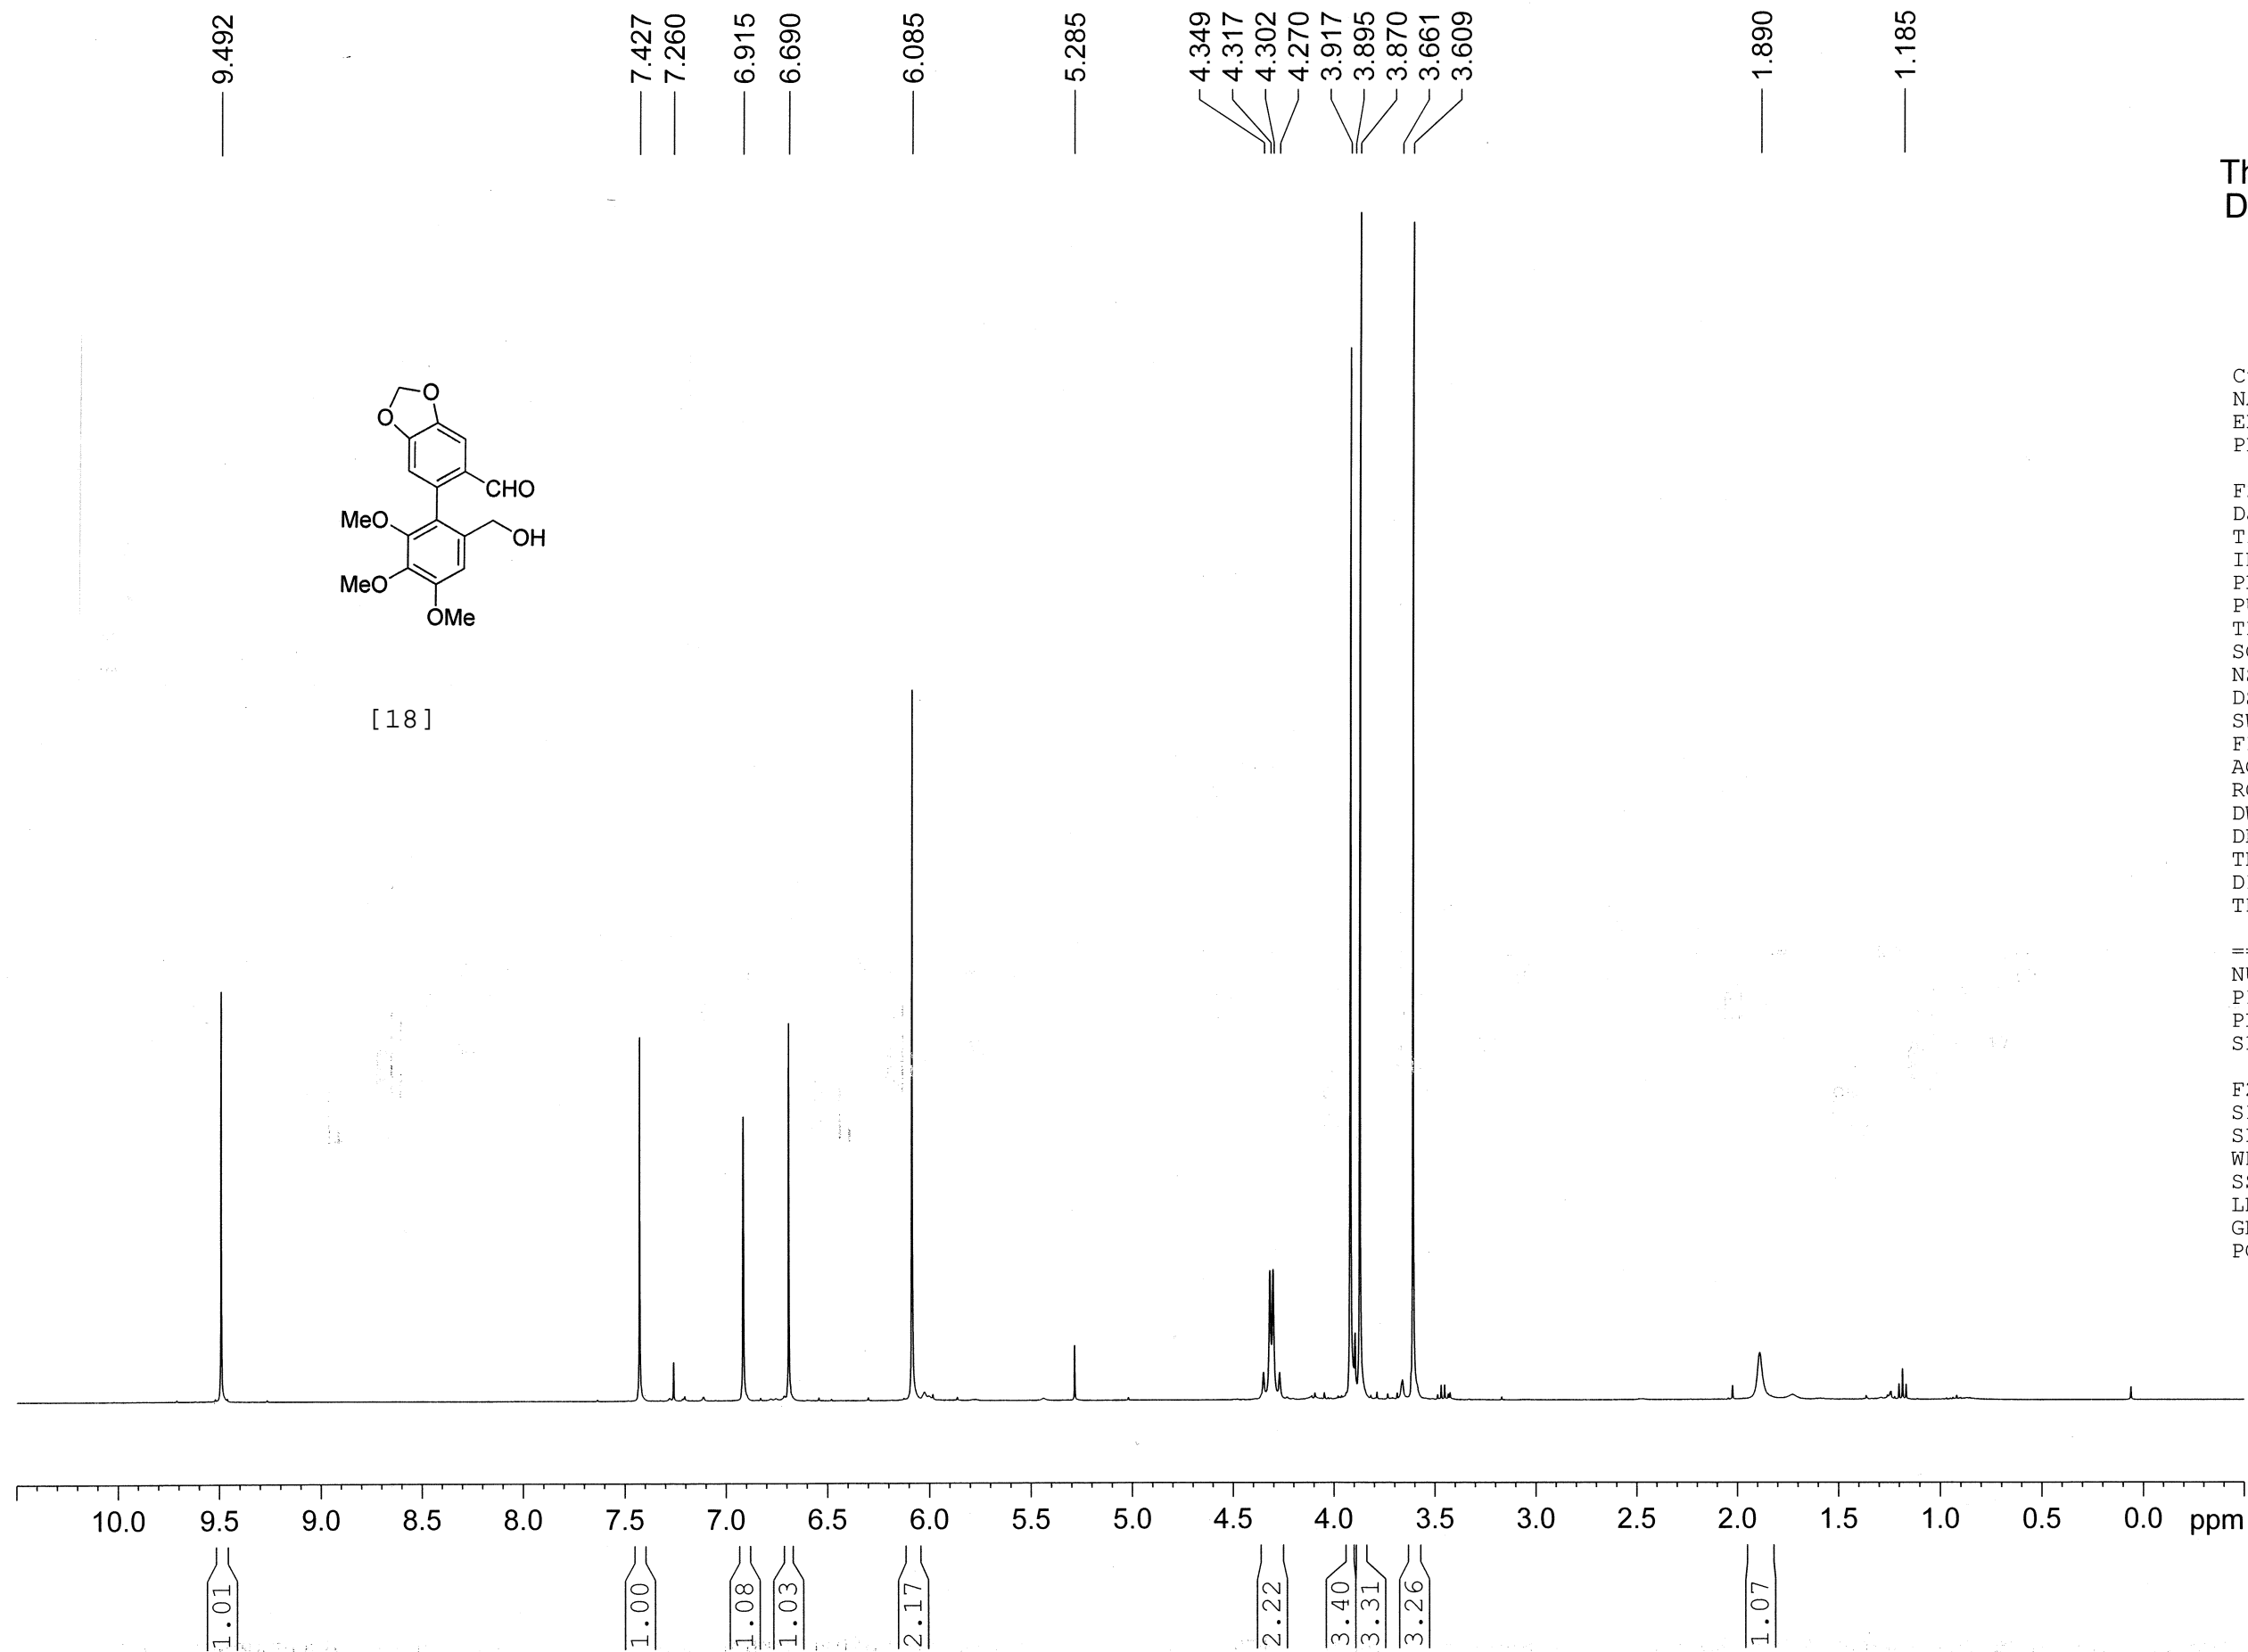

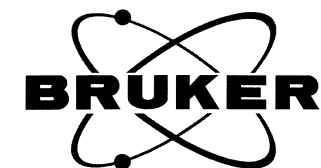

Current Data Parameters  
NAME Wgong-I-274 C13  
EXPNO 482  
PROCNO 1

F2 - Acquisition Parameters  
Date\_ 20110509  
Time\_ 15.12  
INSTRUM spect  
PROBHD 5 mm QNP 1H/13  
PULPROG zgpg30  
TD 65536  
SOLVENT CDC13  
NS 170  
DS 4  
SWH 23980.814 Hz  
FIDRES 0.365918 Hz  
AQ 1.3664756 sec  
RG 1290.2  
DW 20.850 usec  
DE 6.00 usec  
TE 300.2 K  
D1 2.00000000 sec  
d11 0.03000000 sec  
DELTA 1.89999998 sec  
TD0 1

===== CHANNEL f1 =====  
NUC1 13C  
P1 10.50 usec  
PL1 0.00 dB  
SFO1 100.6228298 MHz

===== CHANNEL f2 =====  
CPDPRG2 waltz16  
NUC2 1H  
PCPD2 80.00 usec  
PL2 -6.00 dB  
PL12 14.56 dB  
PL13 16.50 dB  
SFO2 400.1316005 MHz

F2 - Processing parameters  
SI 32768  
SF 100.6127690 MHz  
WDW EM  
SSB 0  
LB 1.00 Hz  
GB 0  
PC 1.40

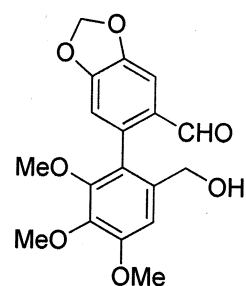

[18]

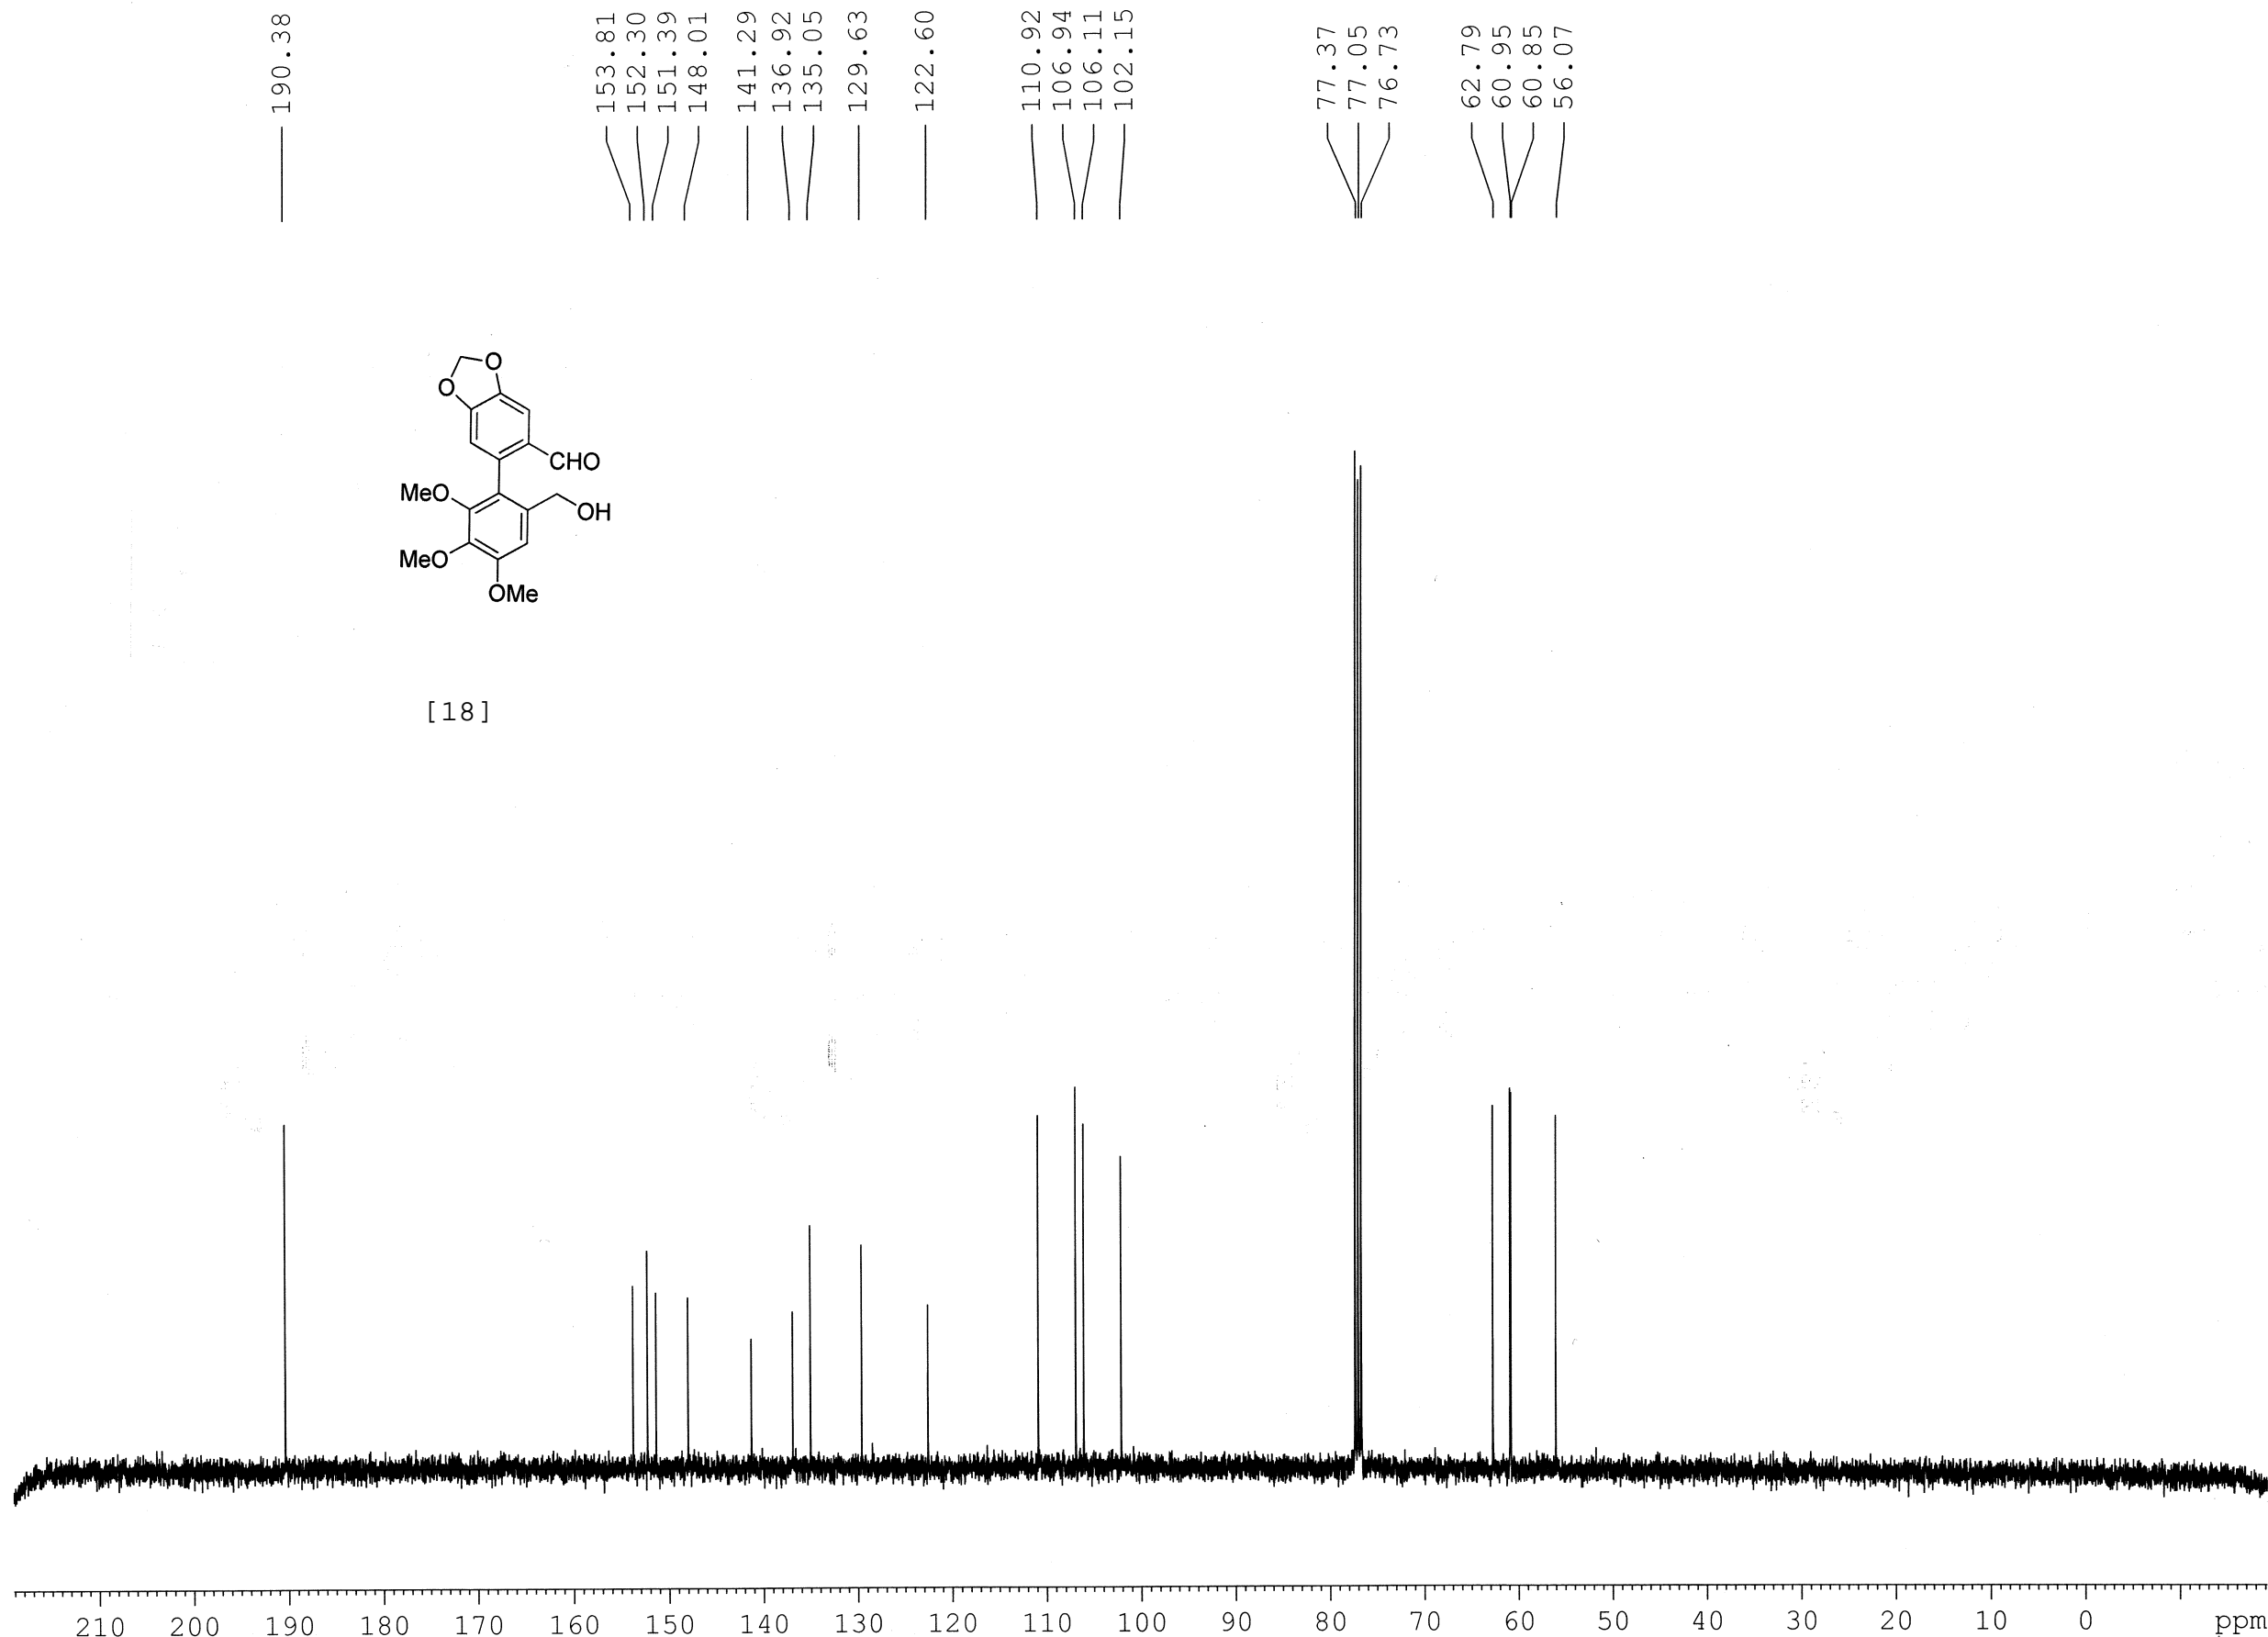



The Ohio State University  
Department of Chemistry  
NMR Facility  
400MHz - 0083

Current Data Parameters  
NAME Wgong-II-30  
EXPNO 14  
PROCNO 1

F2 - Acquisition Parameters  
Date\_ 20091225  
Time 12.27  
INSTRUM spect  
PROBHD 5 mm QNP 1H/13  
PULPROG zg30  
TD 65536  
SOLVENT CDC13  
NS 16  
DS 2  
SWH 8278.146 Hz  
FIDRES 0.126314 Hz  
AQ 3.9584243 sec  
RG 322.5  
DW 60.400 usec  
DE 6.00 usec  
TE 300.2 K  
D1 1.00000000 sec  
TD0 1

===== CHANNEL f1 =====  
NUC1 1H  
P1 13.00 usec  
PL1 0.00 dB  
SFO1 400.1324710 MHz

F2 - Processing parameters  
SI 32768  
SF 400.1300102 MHz  
WDW EM  
SSB 0  
LB 0.30 Hz  
GB 0  
PC 1.00

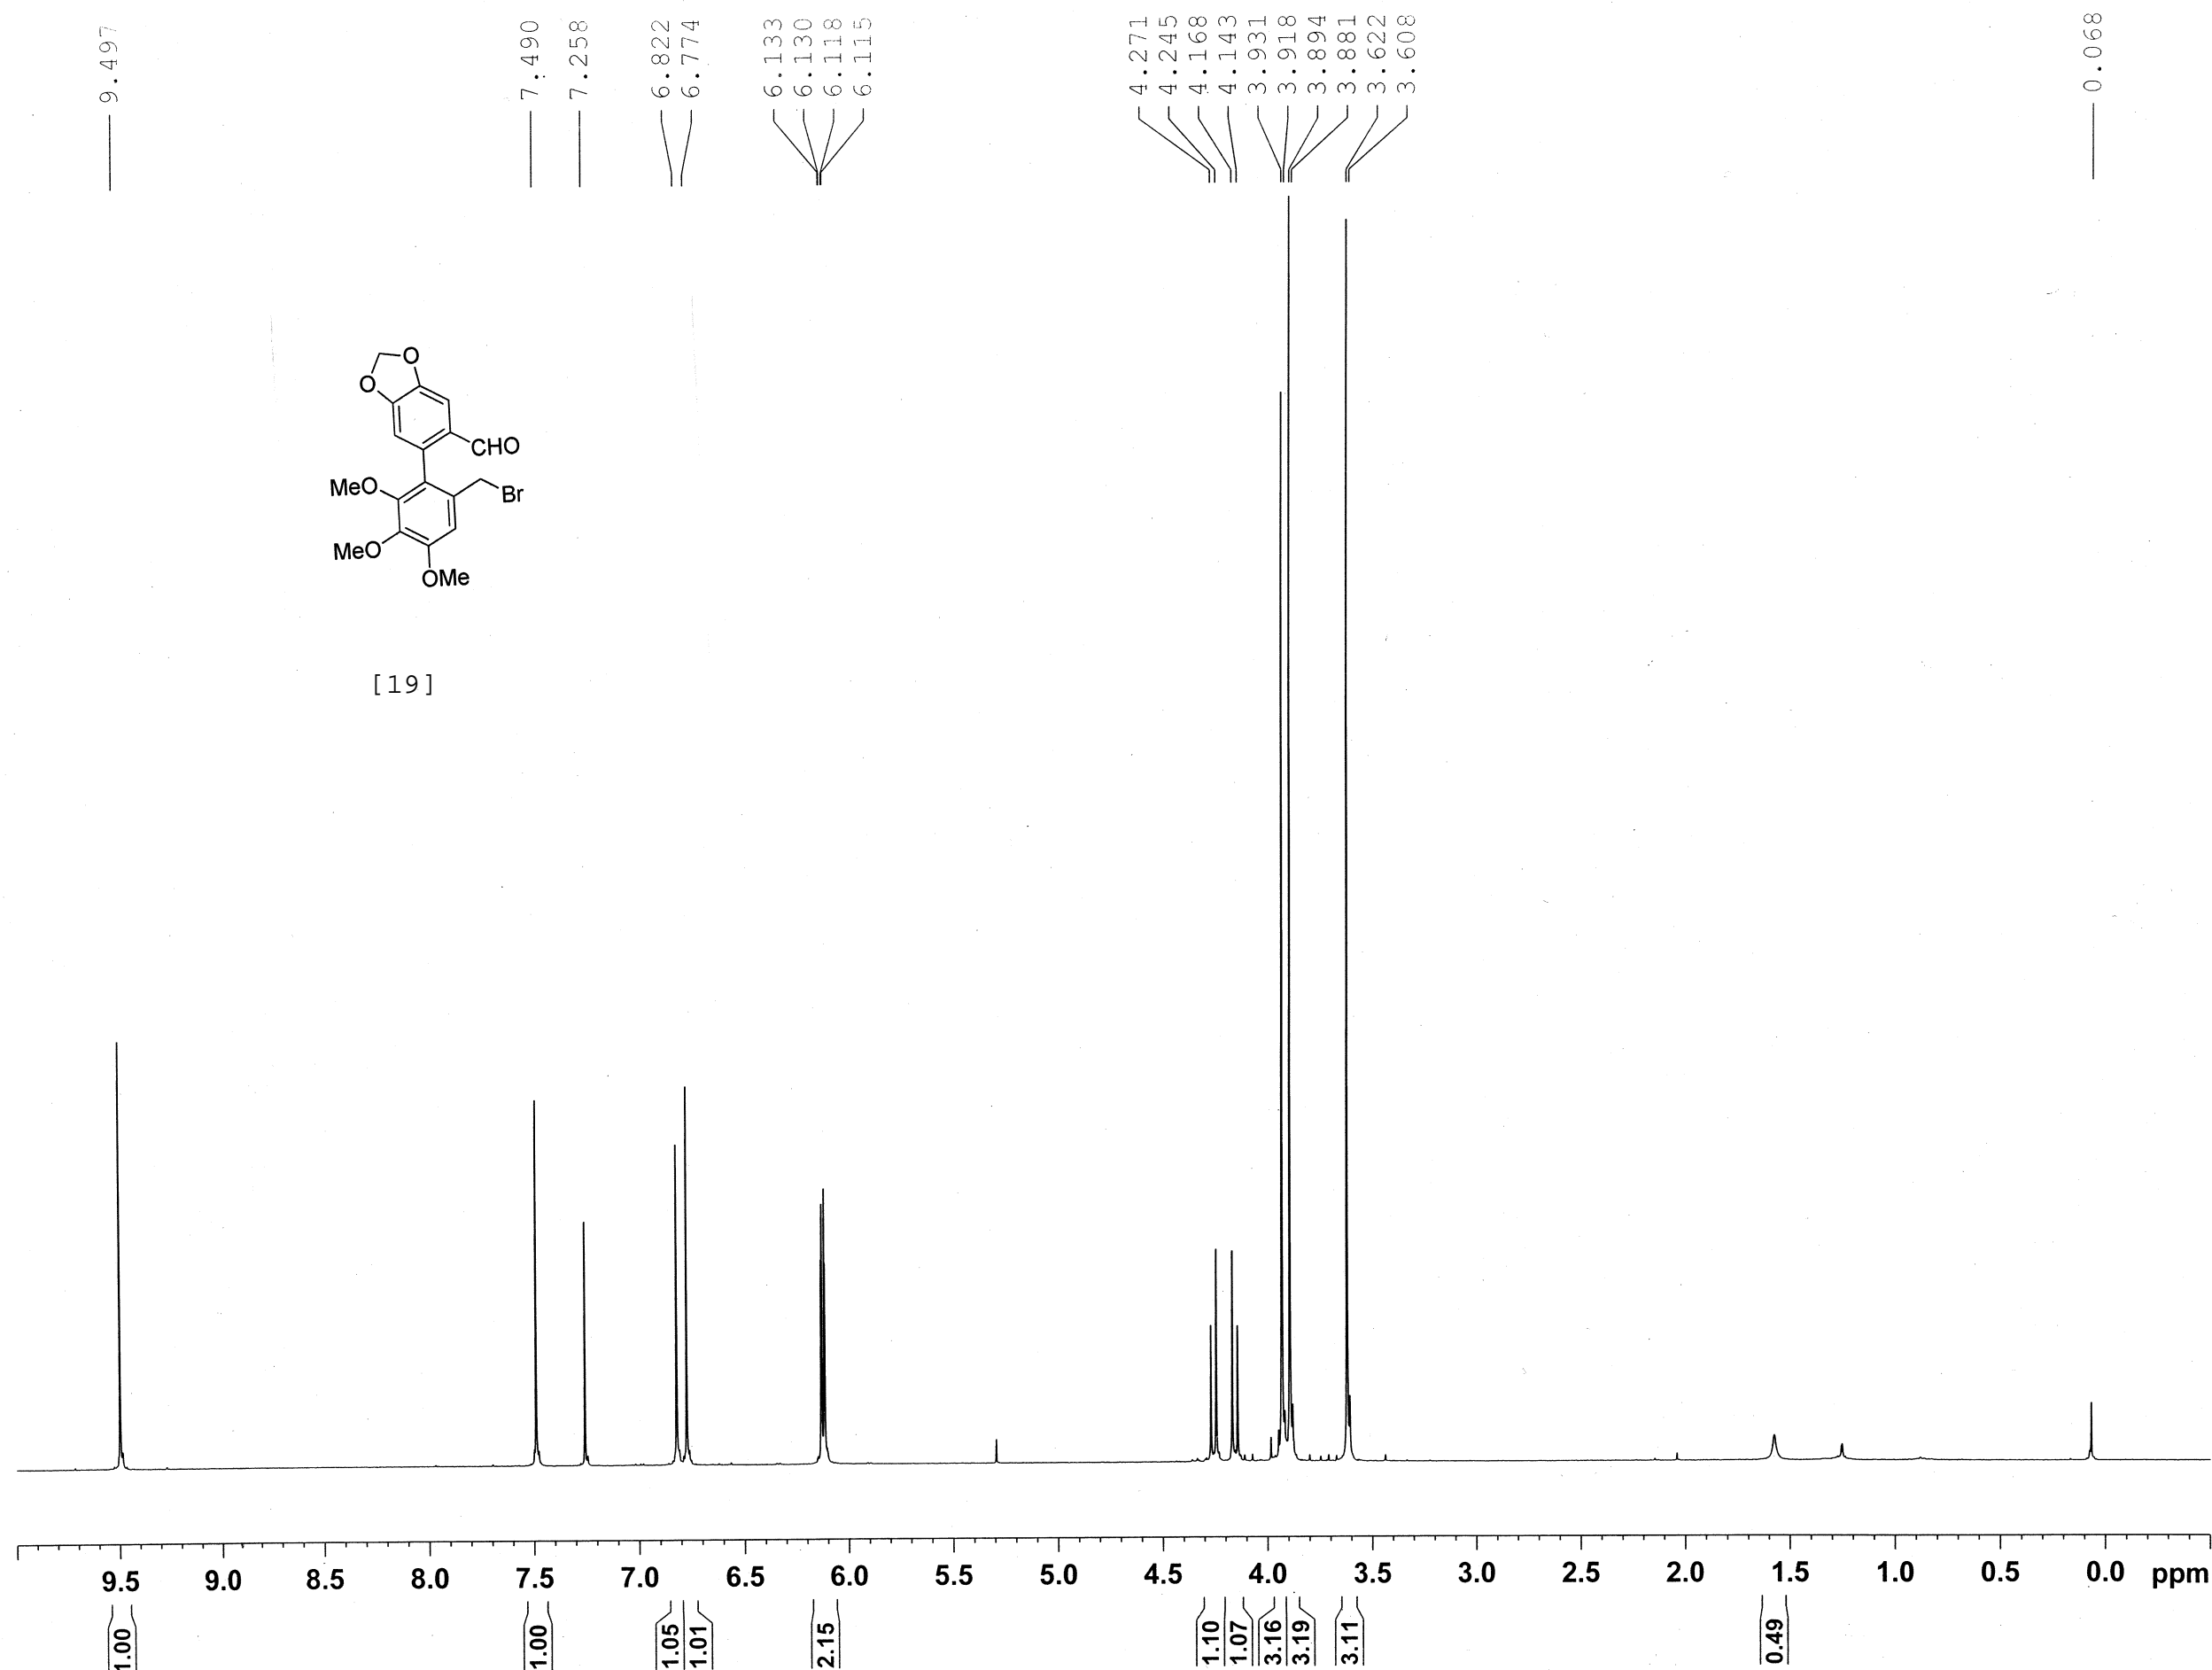



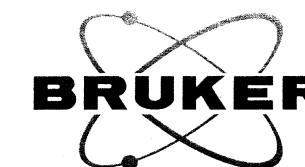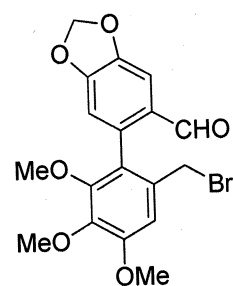

[19]

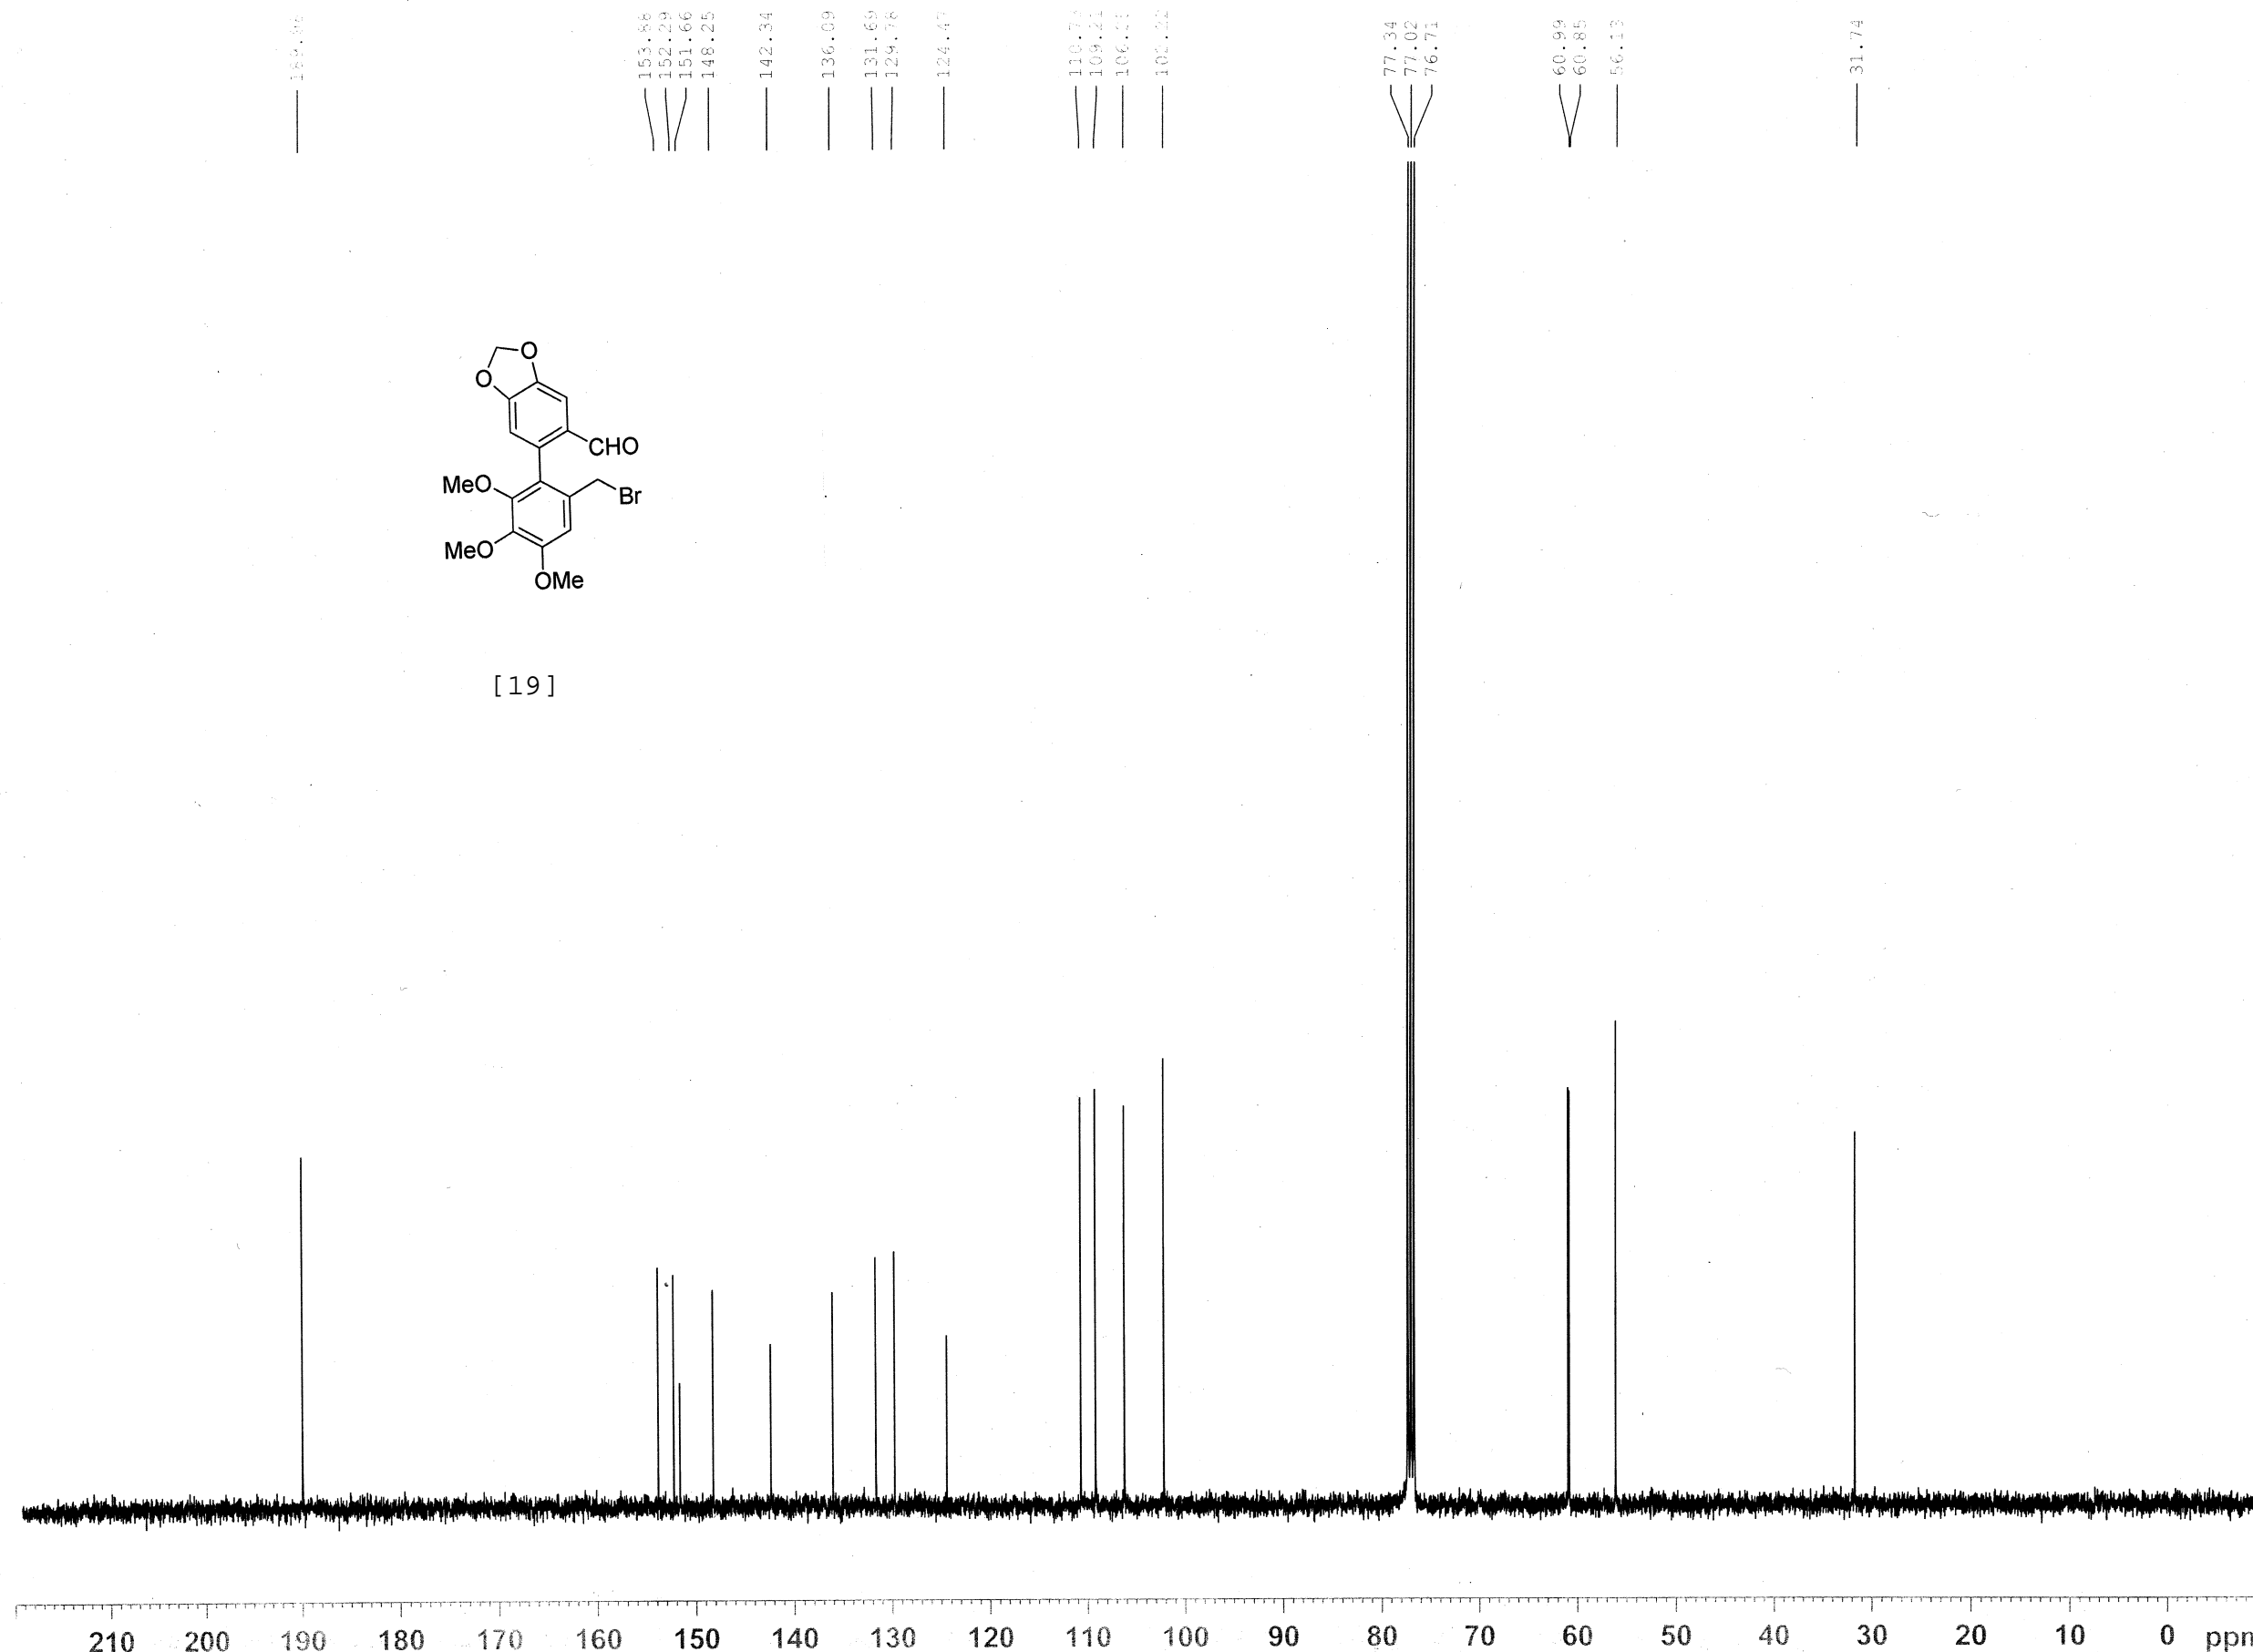

Current Data Parameters  
NAME Wgong-II-30 C13  
EXPNO 15  
PROCNO 1

F2 - Acquisition Parameters  
Date\_ 20091227  
Time 14.38  
INSTRUM spect  
PROBHD 5 mm QNP 1H/13  
PULPROG zgpg30  
TD 65536  
SOLVENT CDCl3  
NS 1024  
DS 4  
SWH 23980.814 Hz  
FIDRES 0.365918 Hz  
AQ 1.3664756 sec  
RG 4096  
DW 20.850 usec  
DE 6.00 usec  
TE 300.2 K  
D1 2.00000000 sec  
d11 0.03000000 sec  
DELTA 1.89999998 sec  
TD0 1

===== CHANNEL f1 =====  
NUC1 13C  
P1 10.50 usec  
PL1 0.00 dB  
SFO1 100.6228298 MHz

===== CHANNEL f2 =====  
CPDPRG2 waltz16  
NUC2 1H  
PCPD2 80.00 usec  
PL2 -6.00 dB  
PL12 14.56 dB  
PL13 16.50 dB  
SFO2 400.1316005 MHz

F2 - Processing parameters  
SI 32768  
SF 100.6127690 MHz  
WDW EM  
SSB 0  
LB 1.00 Hz  
GB 0  
PC 1.40

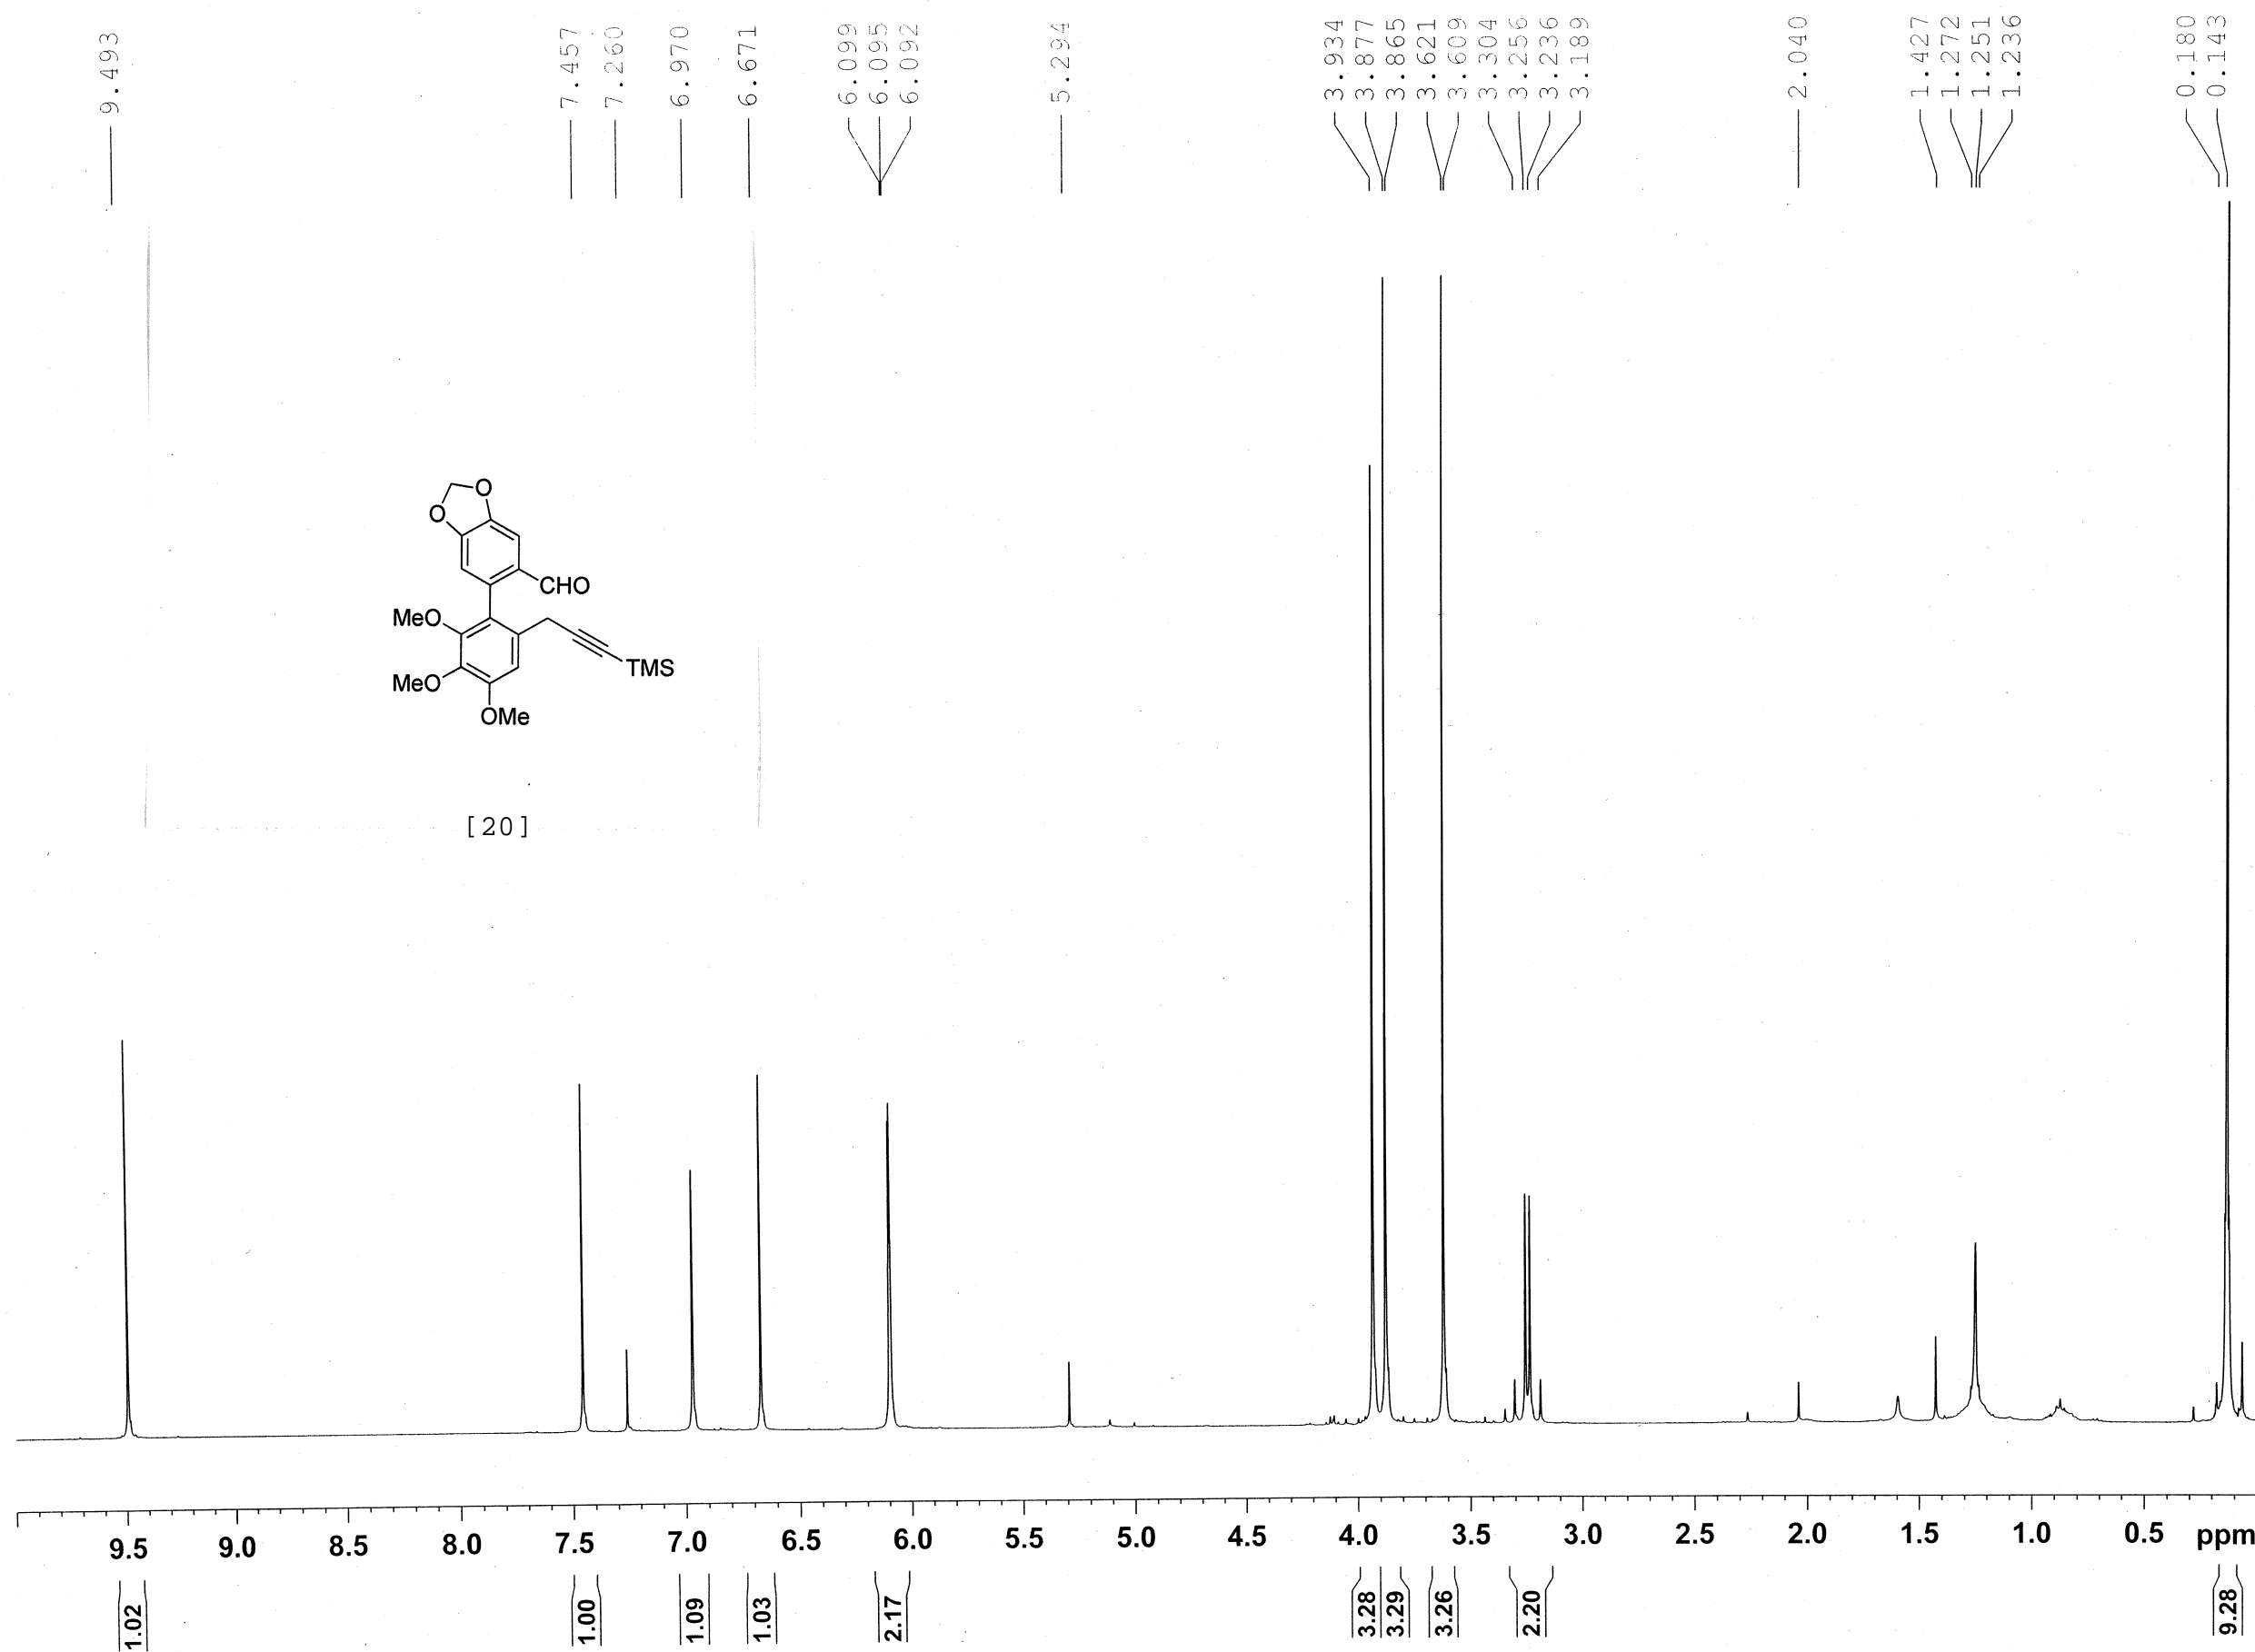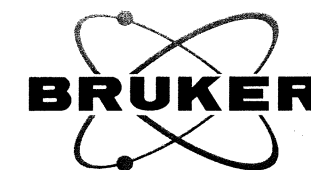

Current Data Parameters  
NAME Wgong-I-185  
EXPNO 2  
PROCNO 1

F2 - Acquisition Parameters  
Date\_ 20090517  
Time 11.04  
INSTRUM spect  
PROBHD 5 mm QNP 1H/13  
PULPROG zg30  
TD 65536  
SOLVENT CDCl3  
NS 16  
DS 2  
SWH 8278.146 Hz  
FIDRES 0.126314 Hz  
AQ 3.9584243 sec  
RG 143.7  
DW 60.400 usec  
DE 6.00 usec  
TE 298.2 K  
D1 1.00000000 sec  
MCREST 0.00000000 sec  
MCWRK 0.01500000 sec

===== CHANNEL f1 =====  
NUC1 1H  
P1 13.00 usec  
PL1 0.00 dB  
SFO1 400.1324710 MHz

F2 - Processing parameters  
SI 32768  
SF 400.1300096 MHz  
WDW EM  
SSB 0  
LB 0.30 Hz  
GB 0  
PC 1.00

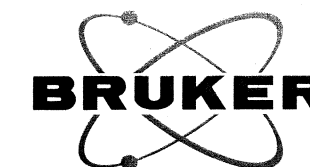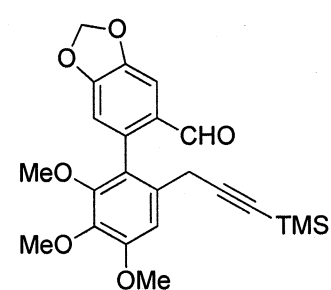

[20]

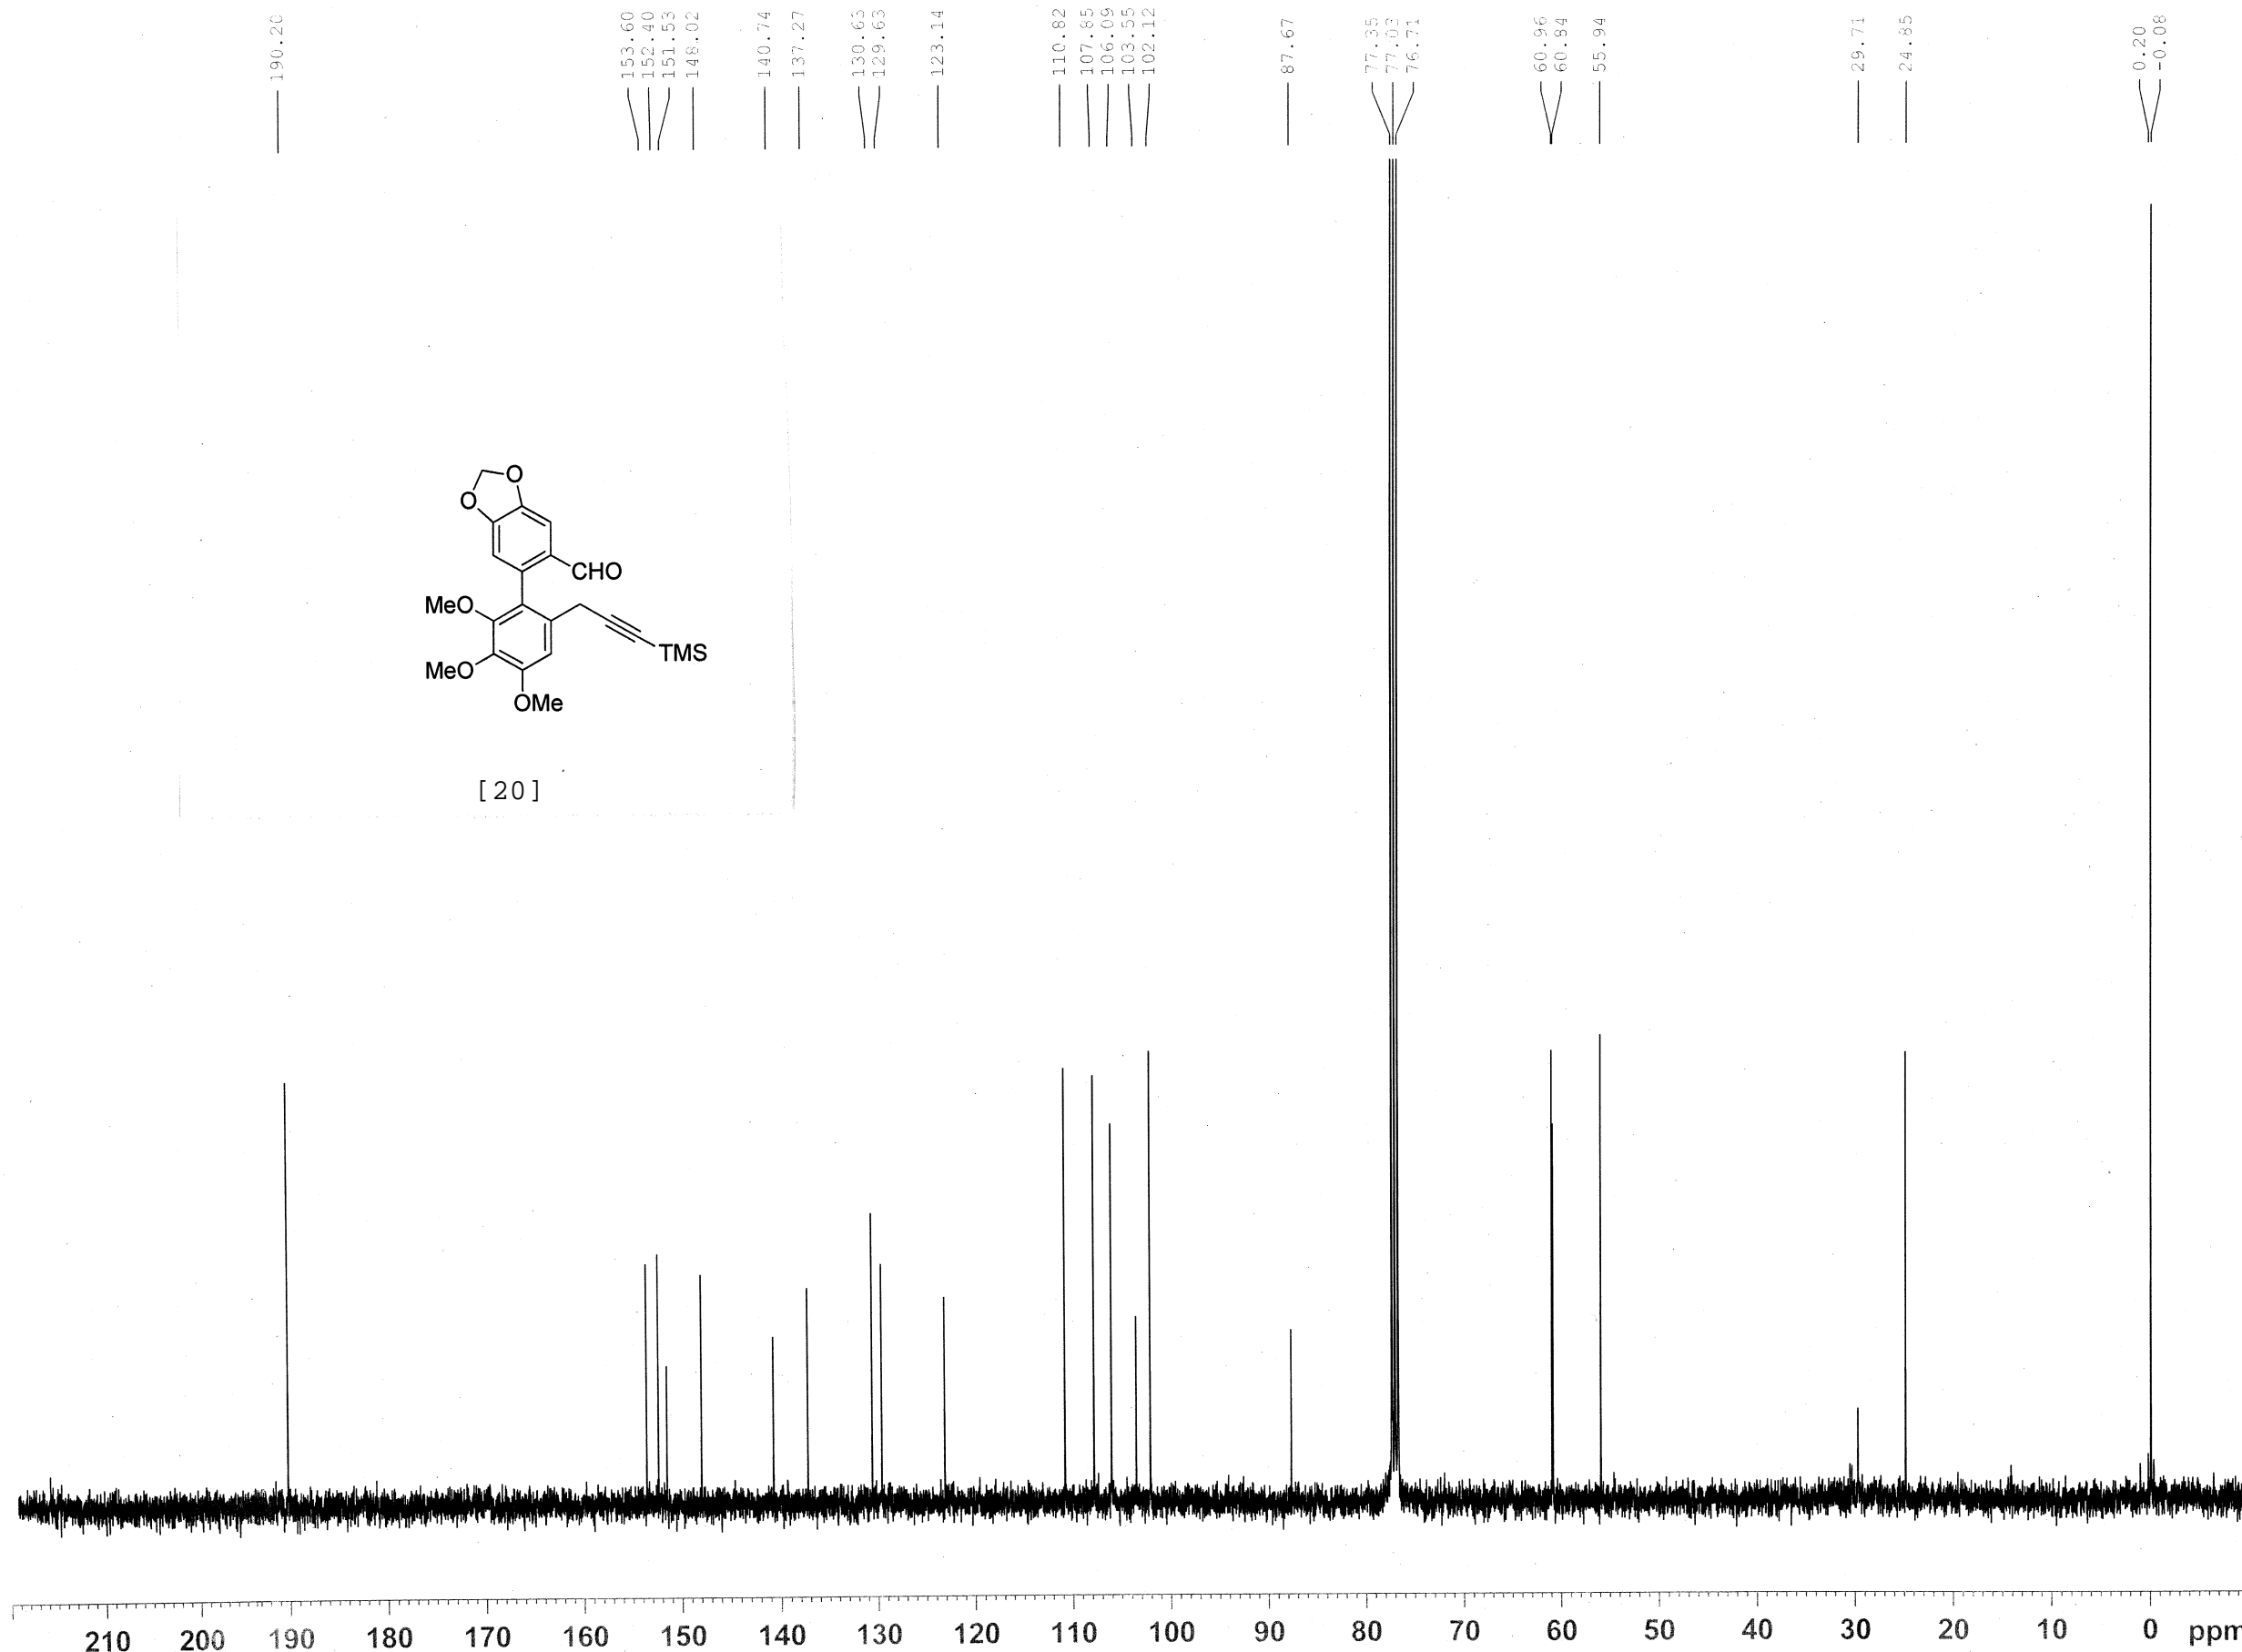

Current Data Parameters  
NAME Wgong-I-185  
EXPNO 2  
PROCNO 1

F2 - Acquisition Parameters  
Date\_ 20090517  
Time\_ 11.09  
INSTRUM spect  
PROBHD 5 mm QNP 1H/13  
PULPROG zgpg30  
TD 65536  
SOLVENT CDCl3  
NS 537  
DS 4  
SWH 23980.814 Hz  
FIDRES 0.365918 Hz  
AQ 1.3664756 sec  
RG 3251  
DW 20.850 usec  
DE 6.00 usec  
TE 298.2 K  
D1 2.00000000 sec  
d11 0.03000000 sec  
DELTA 1.89999998 sec  
MCREST 0.00000000 sec  
MCWRK 0.01500000 sec

===== CHANNEL f1 =====  
NUC1 13C  
P1 10.50 usec  
PL1 0.00 dB  
SFO1 100.6228298 MHz

===== CHANNEL f2 =====  
CPDPRG2 waltz16  
NUC2 1H  
PCPD2 80.00 usec  
PL2 -6.00 dB  
PL12 14.56 dB  
PL13 16.50 dB  
SFO2 400.1316005 MHz

F2 - Processing parameters  
SI 32768  
SF 100.6127690 MHz  
WDW EM  
SSB 0  
LB 1.00 Hz  
GB 0  
PC 1.00

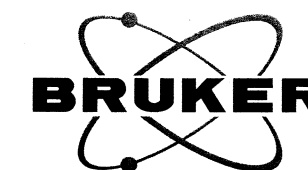

Current Data Parameters  
NAME Wgong-I-189  
EXPNO 2  
PROCNO 1

F2 - Acquisition Parameters  
Date\_ 20090519  
Time 20.23  
INSTRUM spect  
PROBHD 5 mm QNP 1H/13  
PULPROG zg30  
TD 65536  
SOLVENT CDCl3  
NS 16  
DS 2  
SWH 8278.146 Hz  
FIDRES 0.126314 Hz  
AQ 3.9584243 sec  
RG 143.7  
DW 60.400 usec  
DE 6.00 usec  
TE 298.2 K  
D1 1.00000000 sec  
MCREST 0.00000000 sec  
MCWRK 0.01500000 sec

===== CHANNEL f1 =====  
NUC1 1H  
P1 13.00 usec  
PL1 0.00 dB  
SFO1 400.1324710 MHz

F2 - Processing parameters  
SI 32768  
SF 400.1300000 MHz  
WDW EM  
SSB 0  
LB 0.30 Hz  
GB 0  
PC 1.40

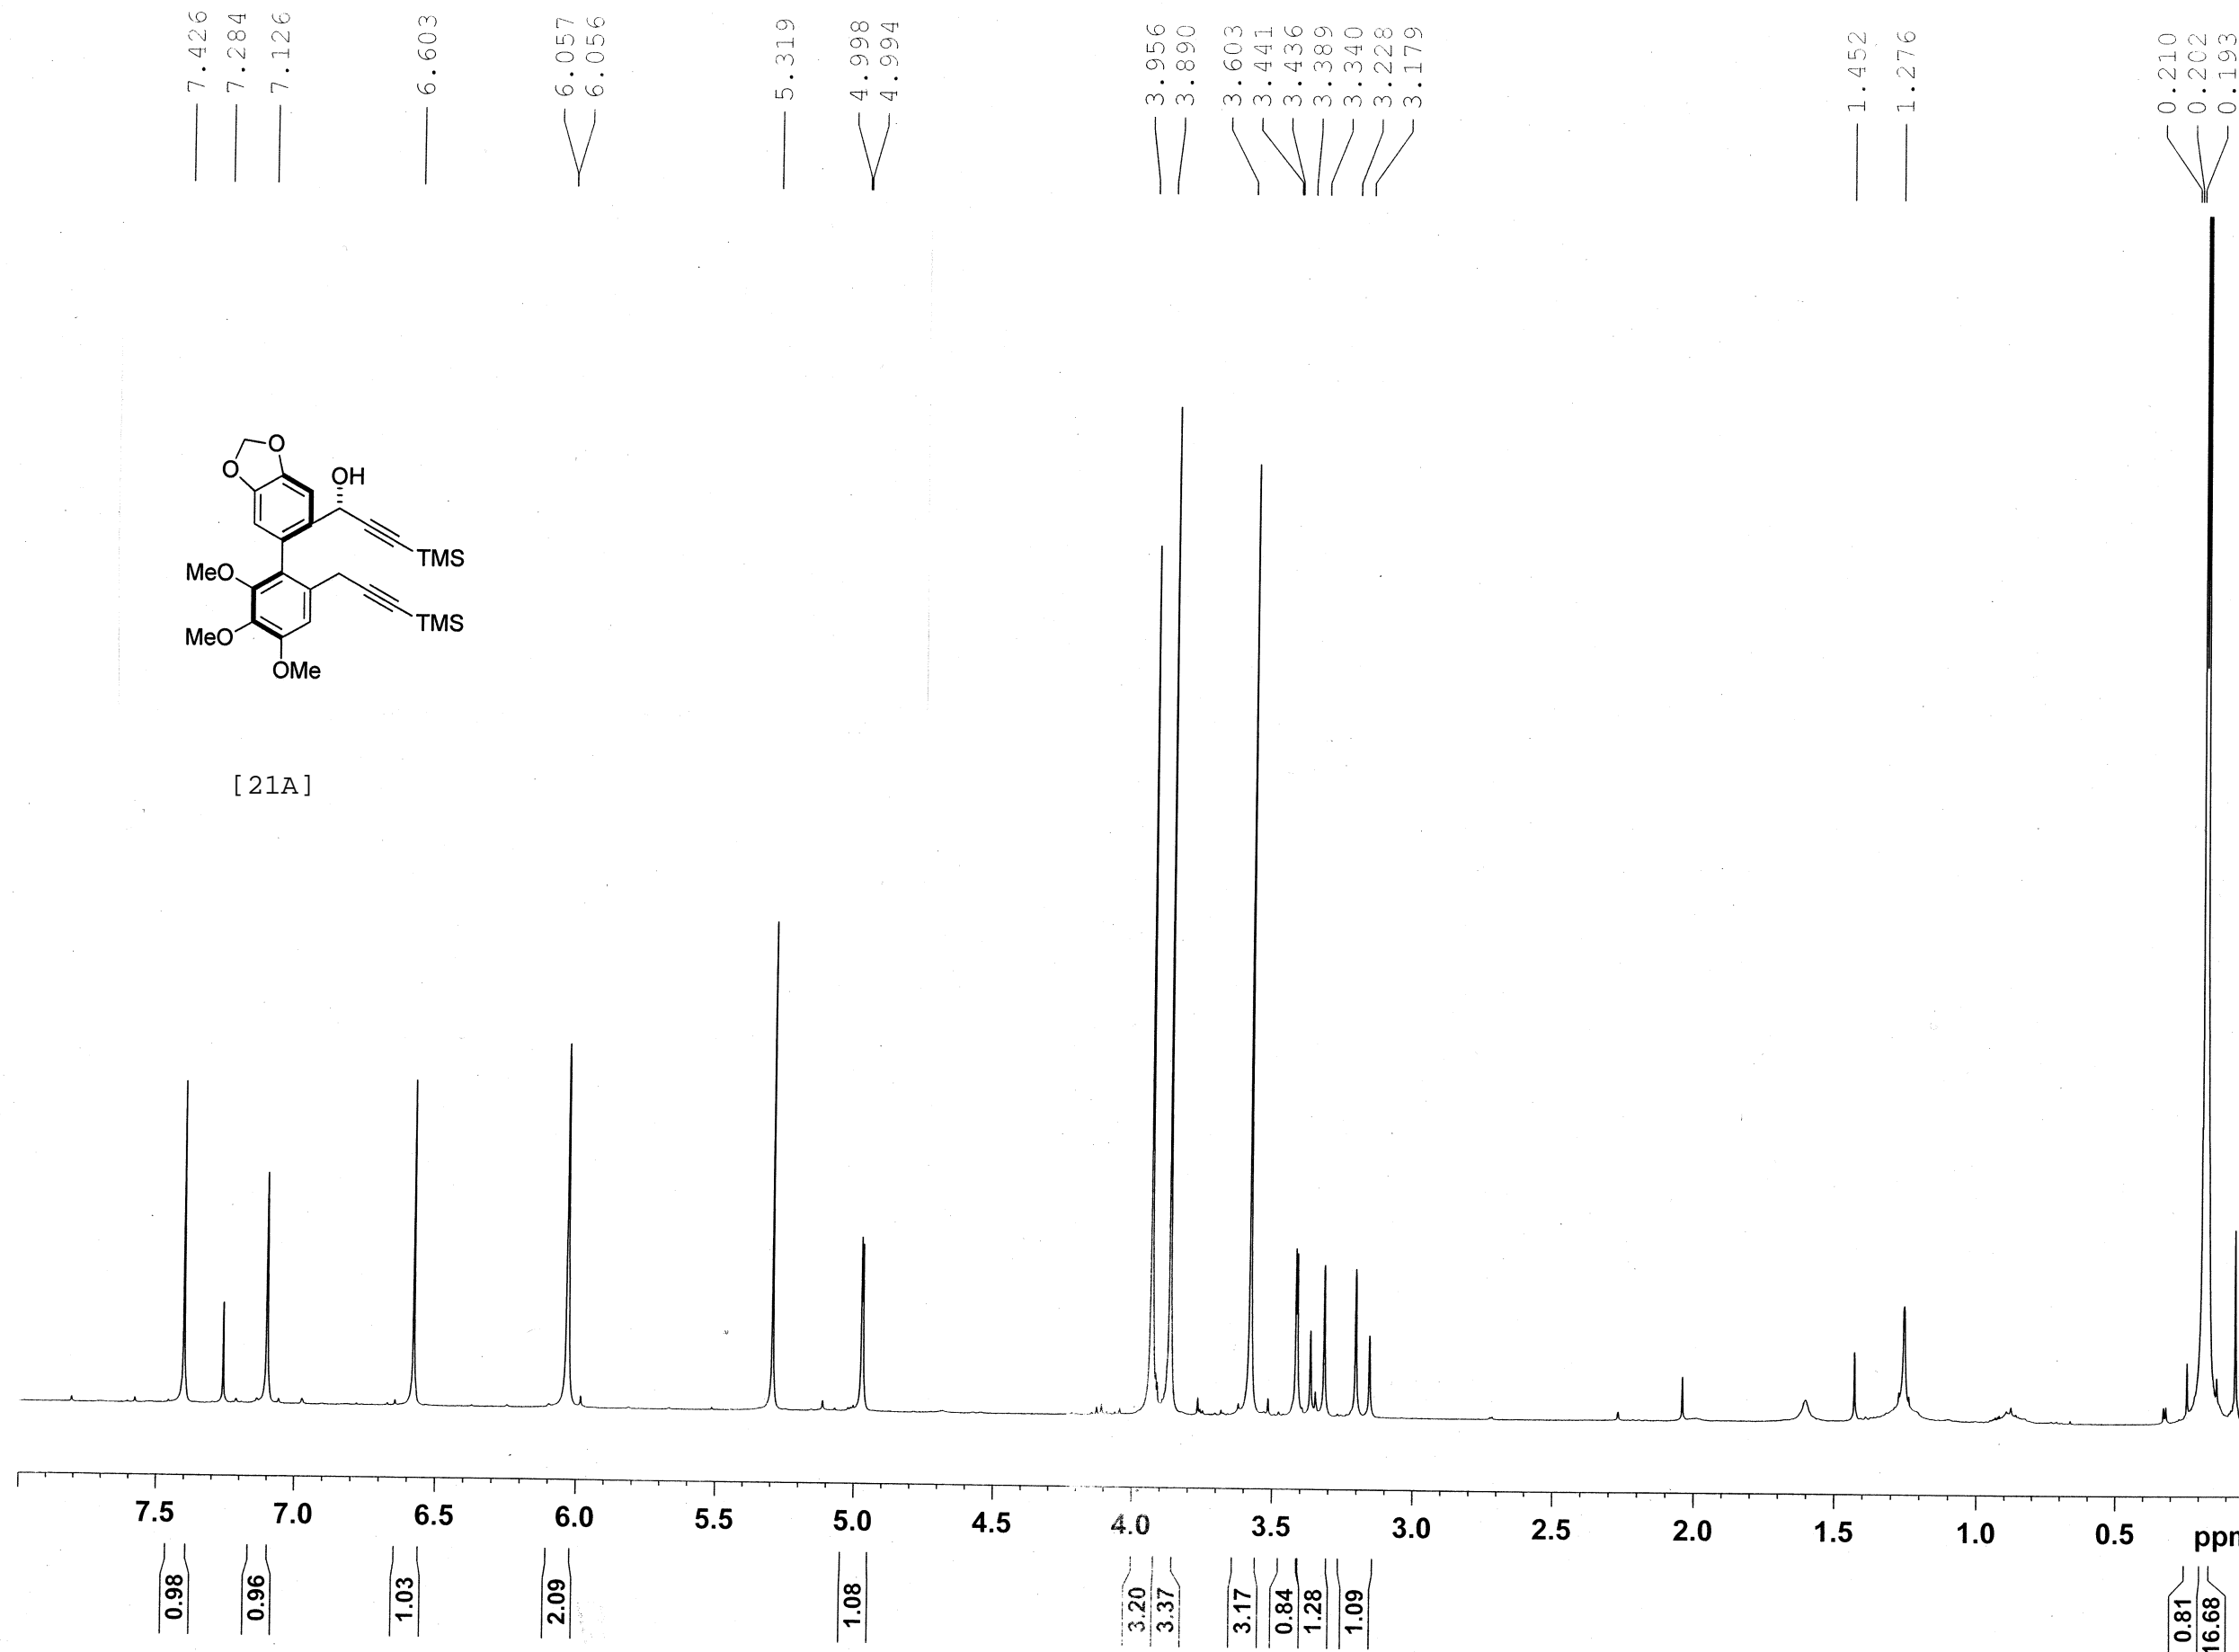

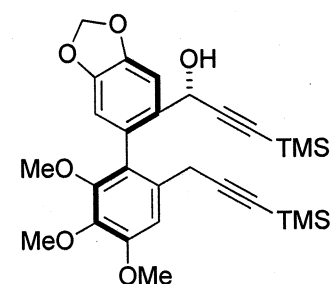

[21A]

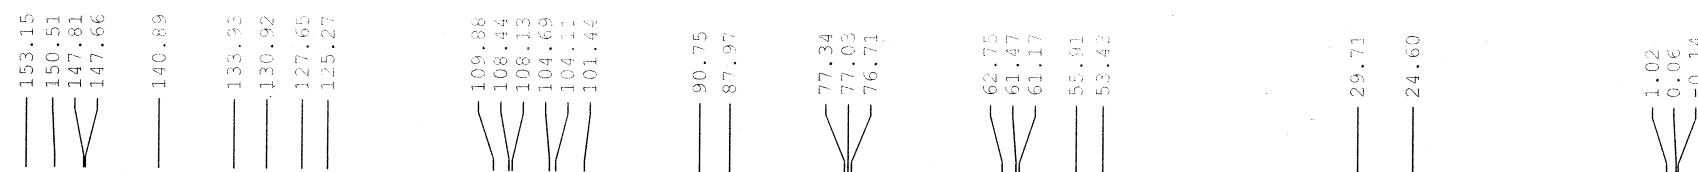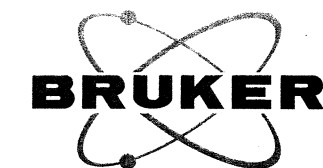

Current Data Parameters  
NAME Wgong-I-189  
EXPNO 2  
PROCNO 1

F2 - Acquisition Parameters  
Date\_ 20090519  
Time\_ 20.31  
INSTRUM spect  
PROBHD 5 mm QNP 1H/13  
PULPROG zgpg30  
TD 65536  
SOLVENT CDCl3  
NS 457  
DS 4  
SWH 23980.814 Hz  
FIDRES 0.365918 Hz  
AQ 1.3664756 sec  
RG 1448.2  
DW 20.850 usec  
DE 6.00 usec  
TE 298.2 K  
D1 2.00000000 sec  
d11 0.03000000 sec  
DELTA 1.89999998 sec  
MCREST 0.00000000 sec  
MCWRK 0.01500000 sec

===== CHANNEL f1 =====  
NUC1 13C  
P1 10.50 usec  
PL1 0.00 dB  
SFO1 100.6228298 MHz

===== CHANNEL f2 =====  
CPDPRG2 waltz16  
NUC2 1H  
PCPD2 80.00 usec  
PL2 -6.00 dB  
PL12 14.56 dB  
PL13 16.50 dB  
SFO2 400.1316005 MHz

F2 - Processing parameters  
SI 32768  
SF 100.6127690 MHz  
WDW EM  
SSB 0  
LB 1.00 Hz  
GB 0  
PC 1.00

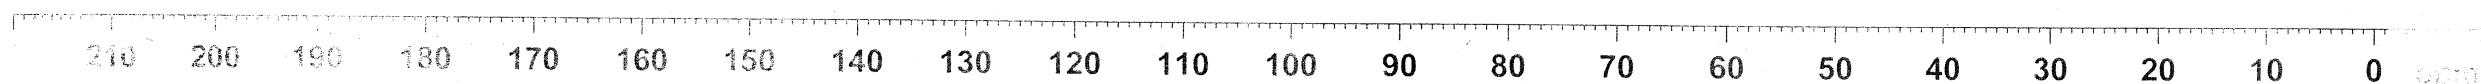

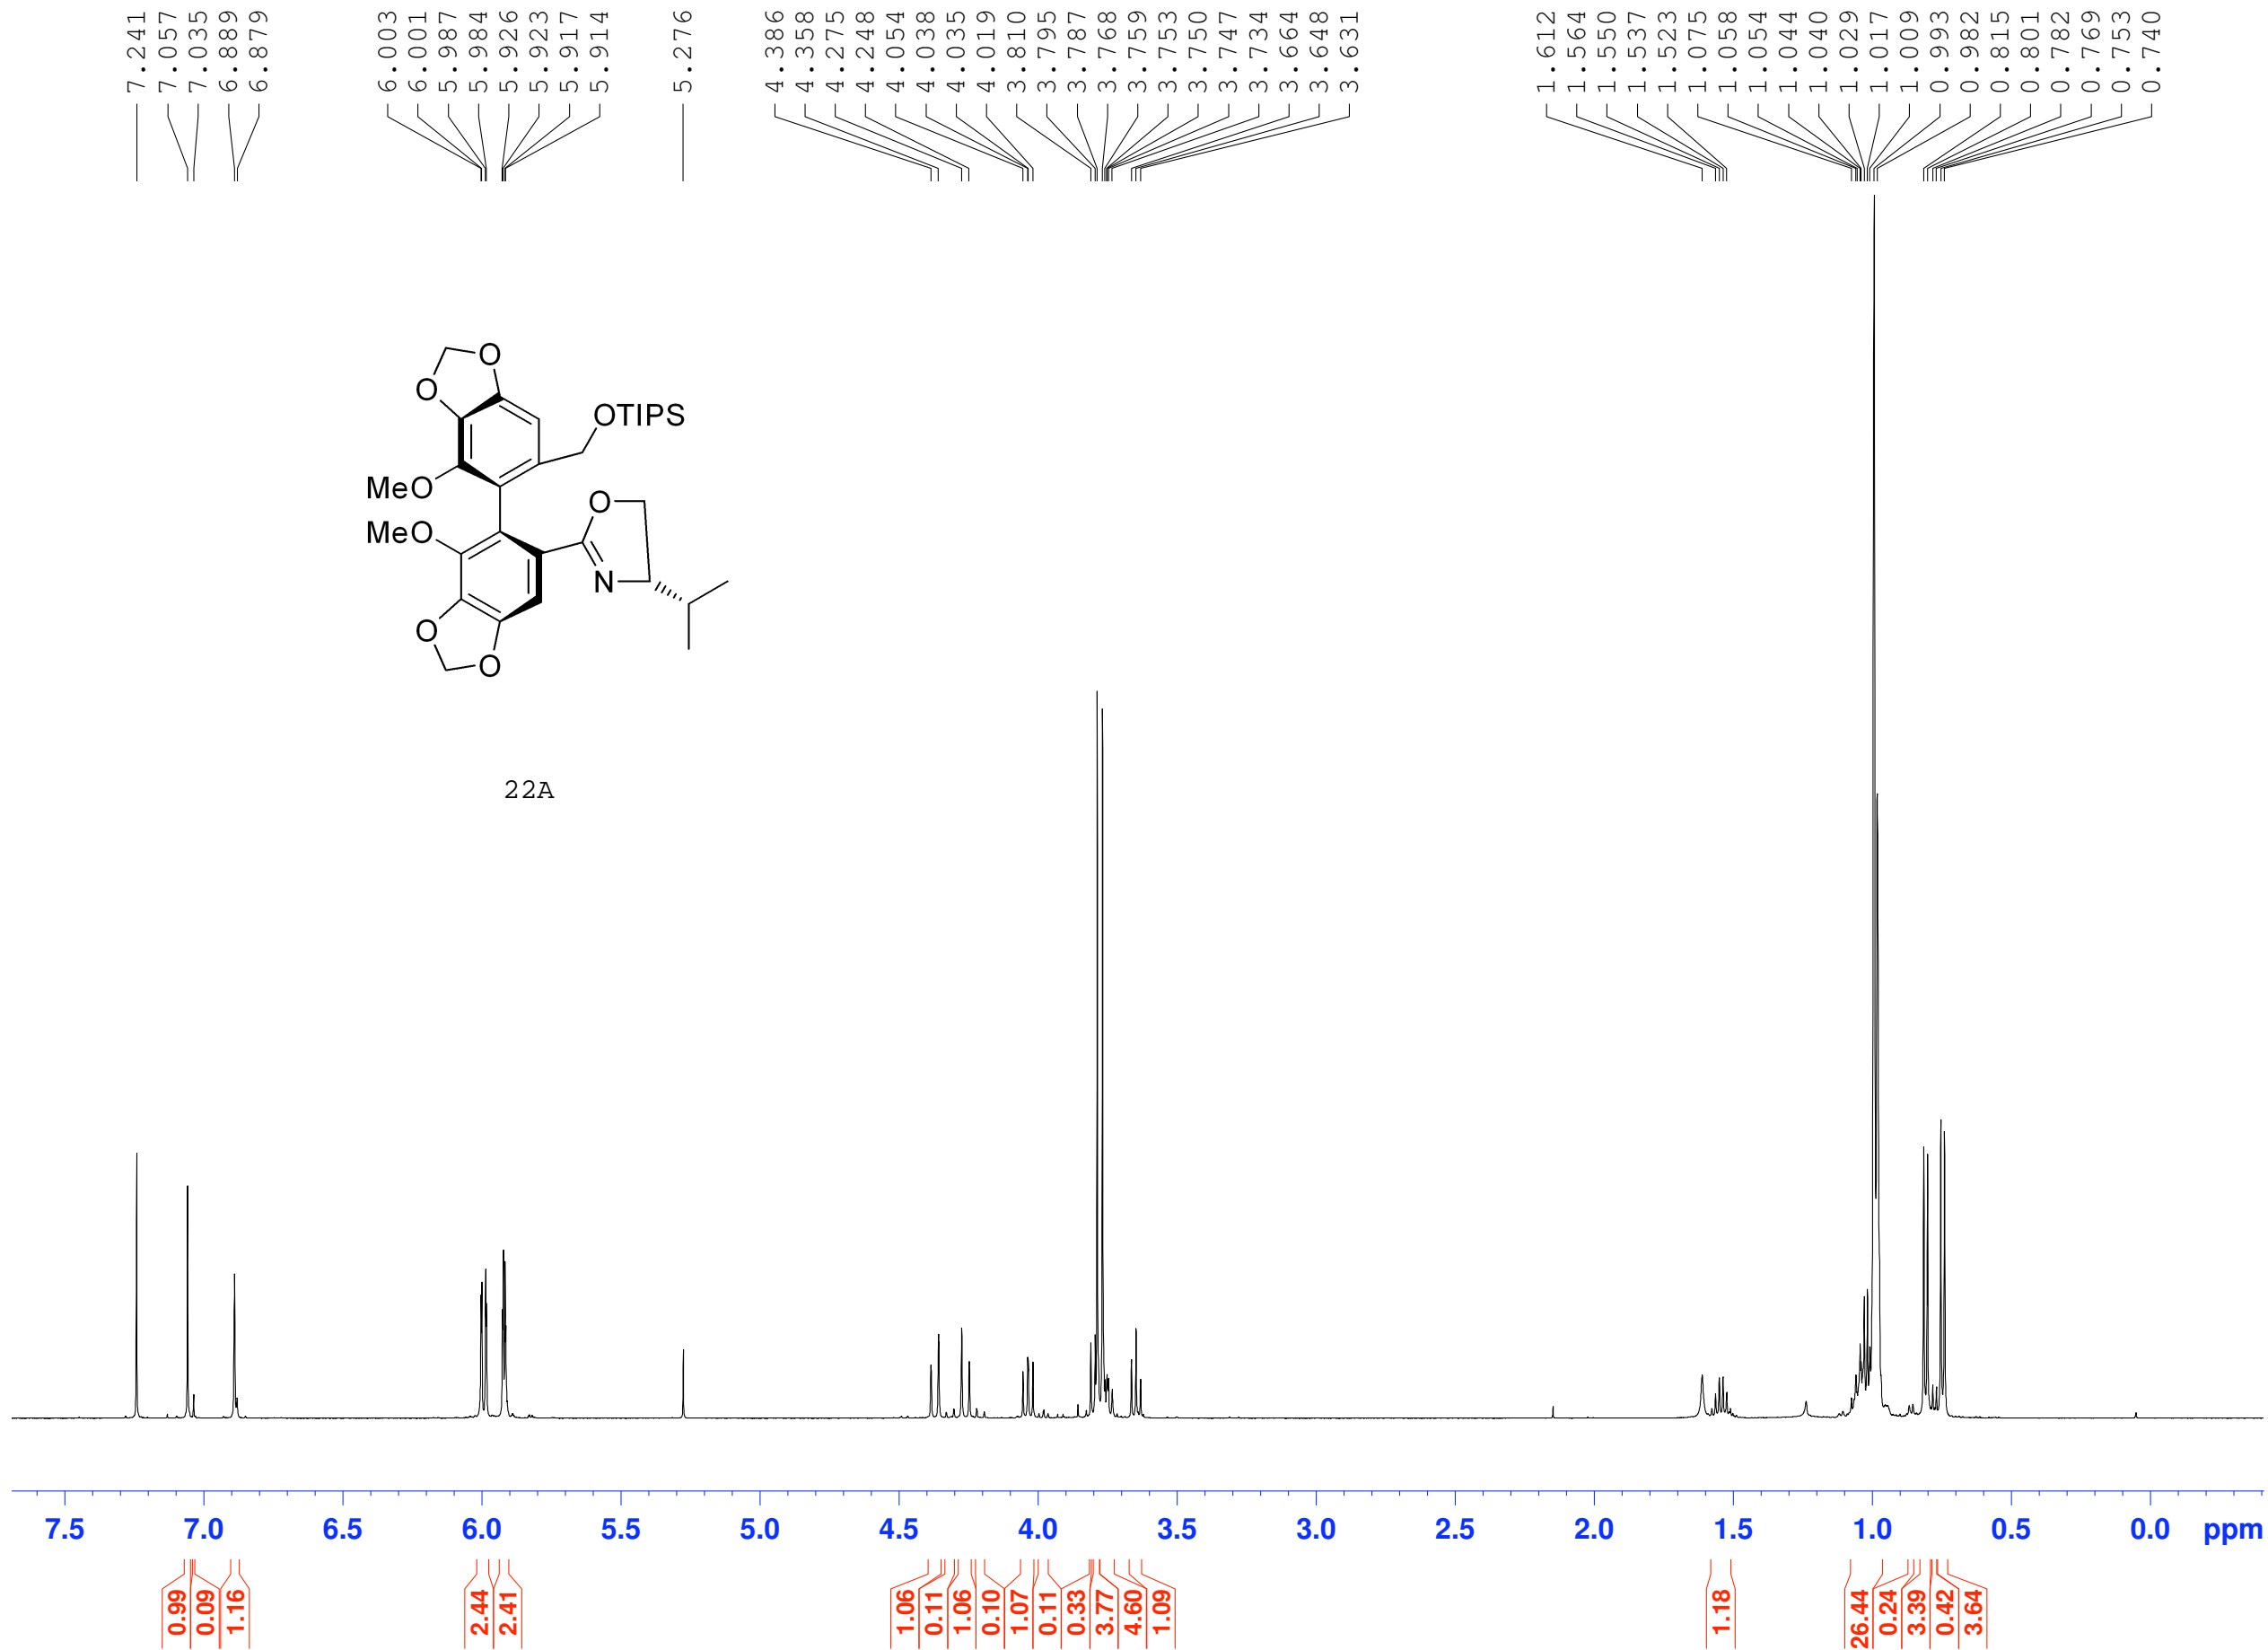

Current Data Parameters  
NAME Rs-1-278  
EXPNO 1  
PROCNO 1

F2 - Acquisition Parameters  
Date\_ 20080204  
Time 17.55  
INSTRUM spect  
PROBHD 5 mm Multinucl  
PULPROG zg30  
TD 65536  
SOLVENT CDCl3  
NS 16  
DS 2  
SWH 10330.578 Hz  
FIDRES 0.157632 Hz  
AQ 3.1719923 sec  
RG 203.2  
DW 48.400 usec  
DE 6.00 usec  
TE 300.2 K  
D1 1.00000000 sec  
MCREST 0.00000000 sec  
MCWRK 0.01500000 sec

===== CHANNEL f1 =====  
NUC1 1H  
P1 14.80 usec  
PL1 -1.00 dB  
SFO1 500.0230878 MHz

F2 - Processing parameters  
SI 32768  
SF 500.0200213 MHz  
WDW EM  
SSB 0  
LB 0.30 Hz  
GB 0  
PC 1.40

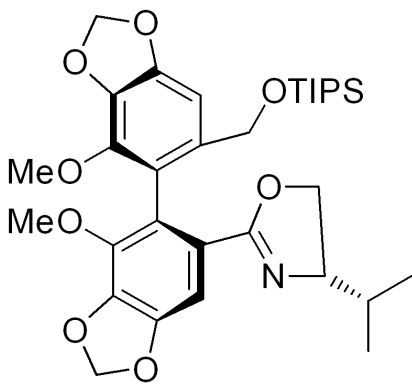

22A

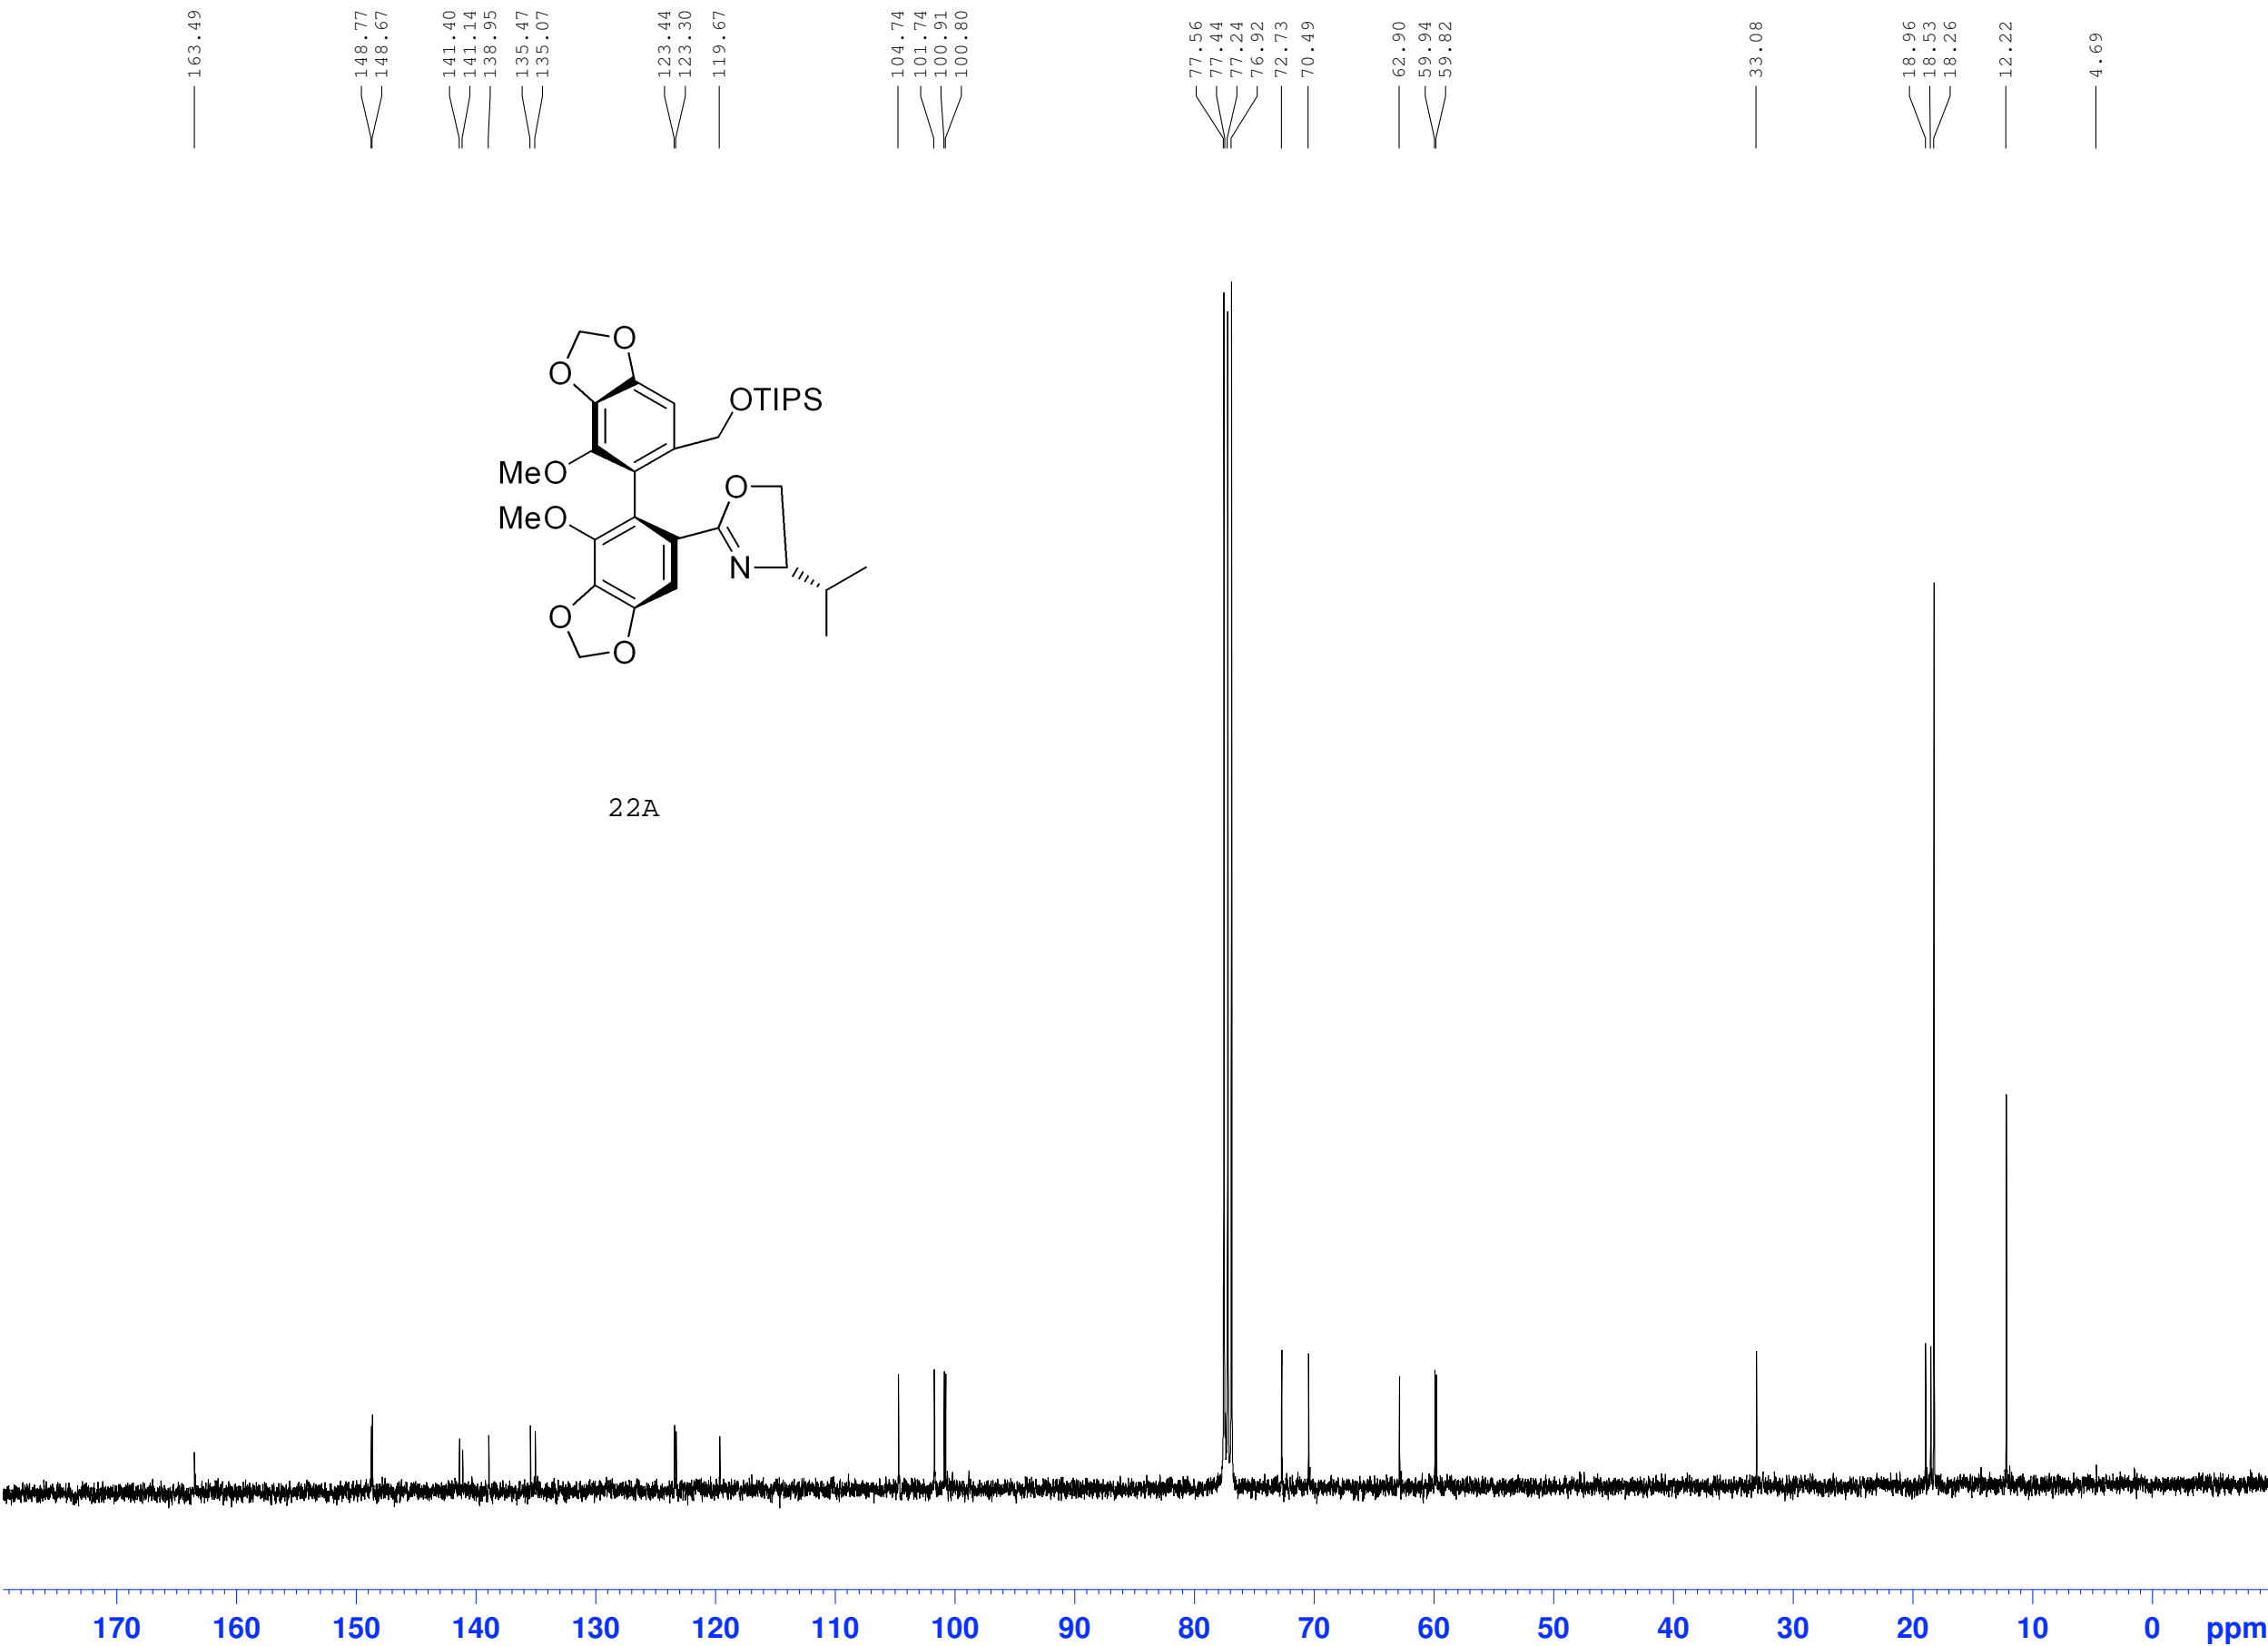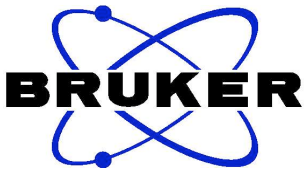

```
Current Data Parameters
NAME          Rs-1-278
EXPNO          3
PROCNO         1
```

```

F2 - Acquisition Parameters
Date_                20080204
Time                 15.37
INSTRUM              spect
PROBHD      5 mm QNP 1H/13
PULPROG              zgpg30
TD                   65536
SOLVENT              CDC13
NS                    750
DS                     4
SWH                 23980.814 Hz
FIDRES              0.365918 Hz
AQ                 1.3664756 sec
RG                   3649.1
DW                 20.850 use
DE                   6.00 use
TE                  300.2 K
D1                 2.00000000 sec
d11                 0.03000000 sec
DELTA              1.89999998 sec
MCREST             0.00000000 sec
MCWRK              0.01500000 sec

```

```
===== CHANNEL f1 =====
NUC1                13C
P1                  10.50 use
PL1                 0.00 dB
SFO1               100.6228298 MHz
```

```
===== CHANNEL f2 =====
CPDPRG2          waltz16
NUC2              1H
PCPD2            80.00 use
PL2              -6.00 dB
PL12             14.56 dB
PL13             16.50 dB
SFO2             400.1316005 MHz
```

```
F2 - Processing parameters
SI                      32768
SF                      100.6127461 MHz
WDW                      EM
SSB                      0
LB                      1.00 Hz
GB                      0
PC                      1.40
```



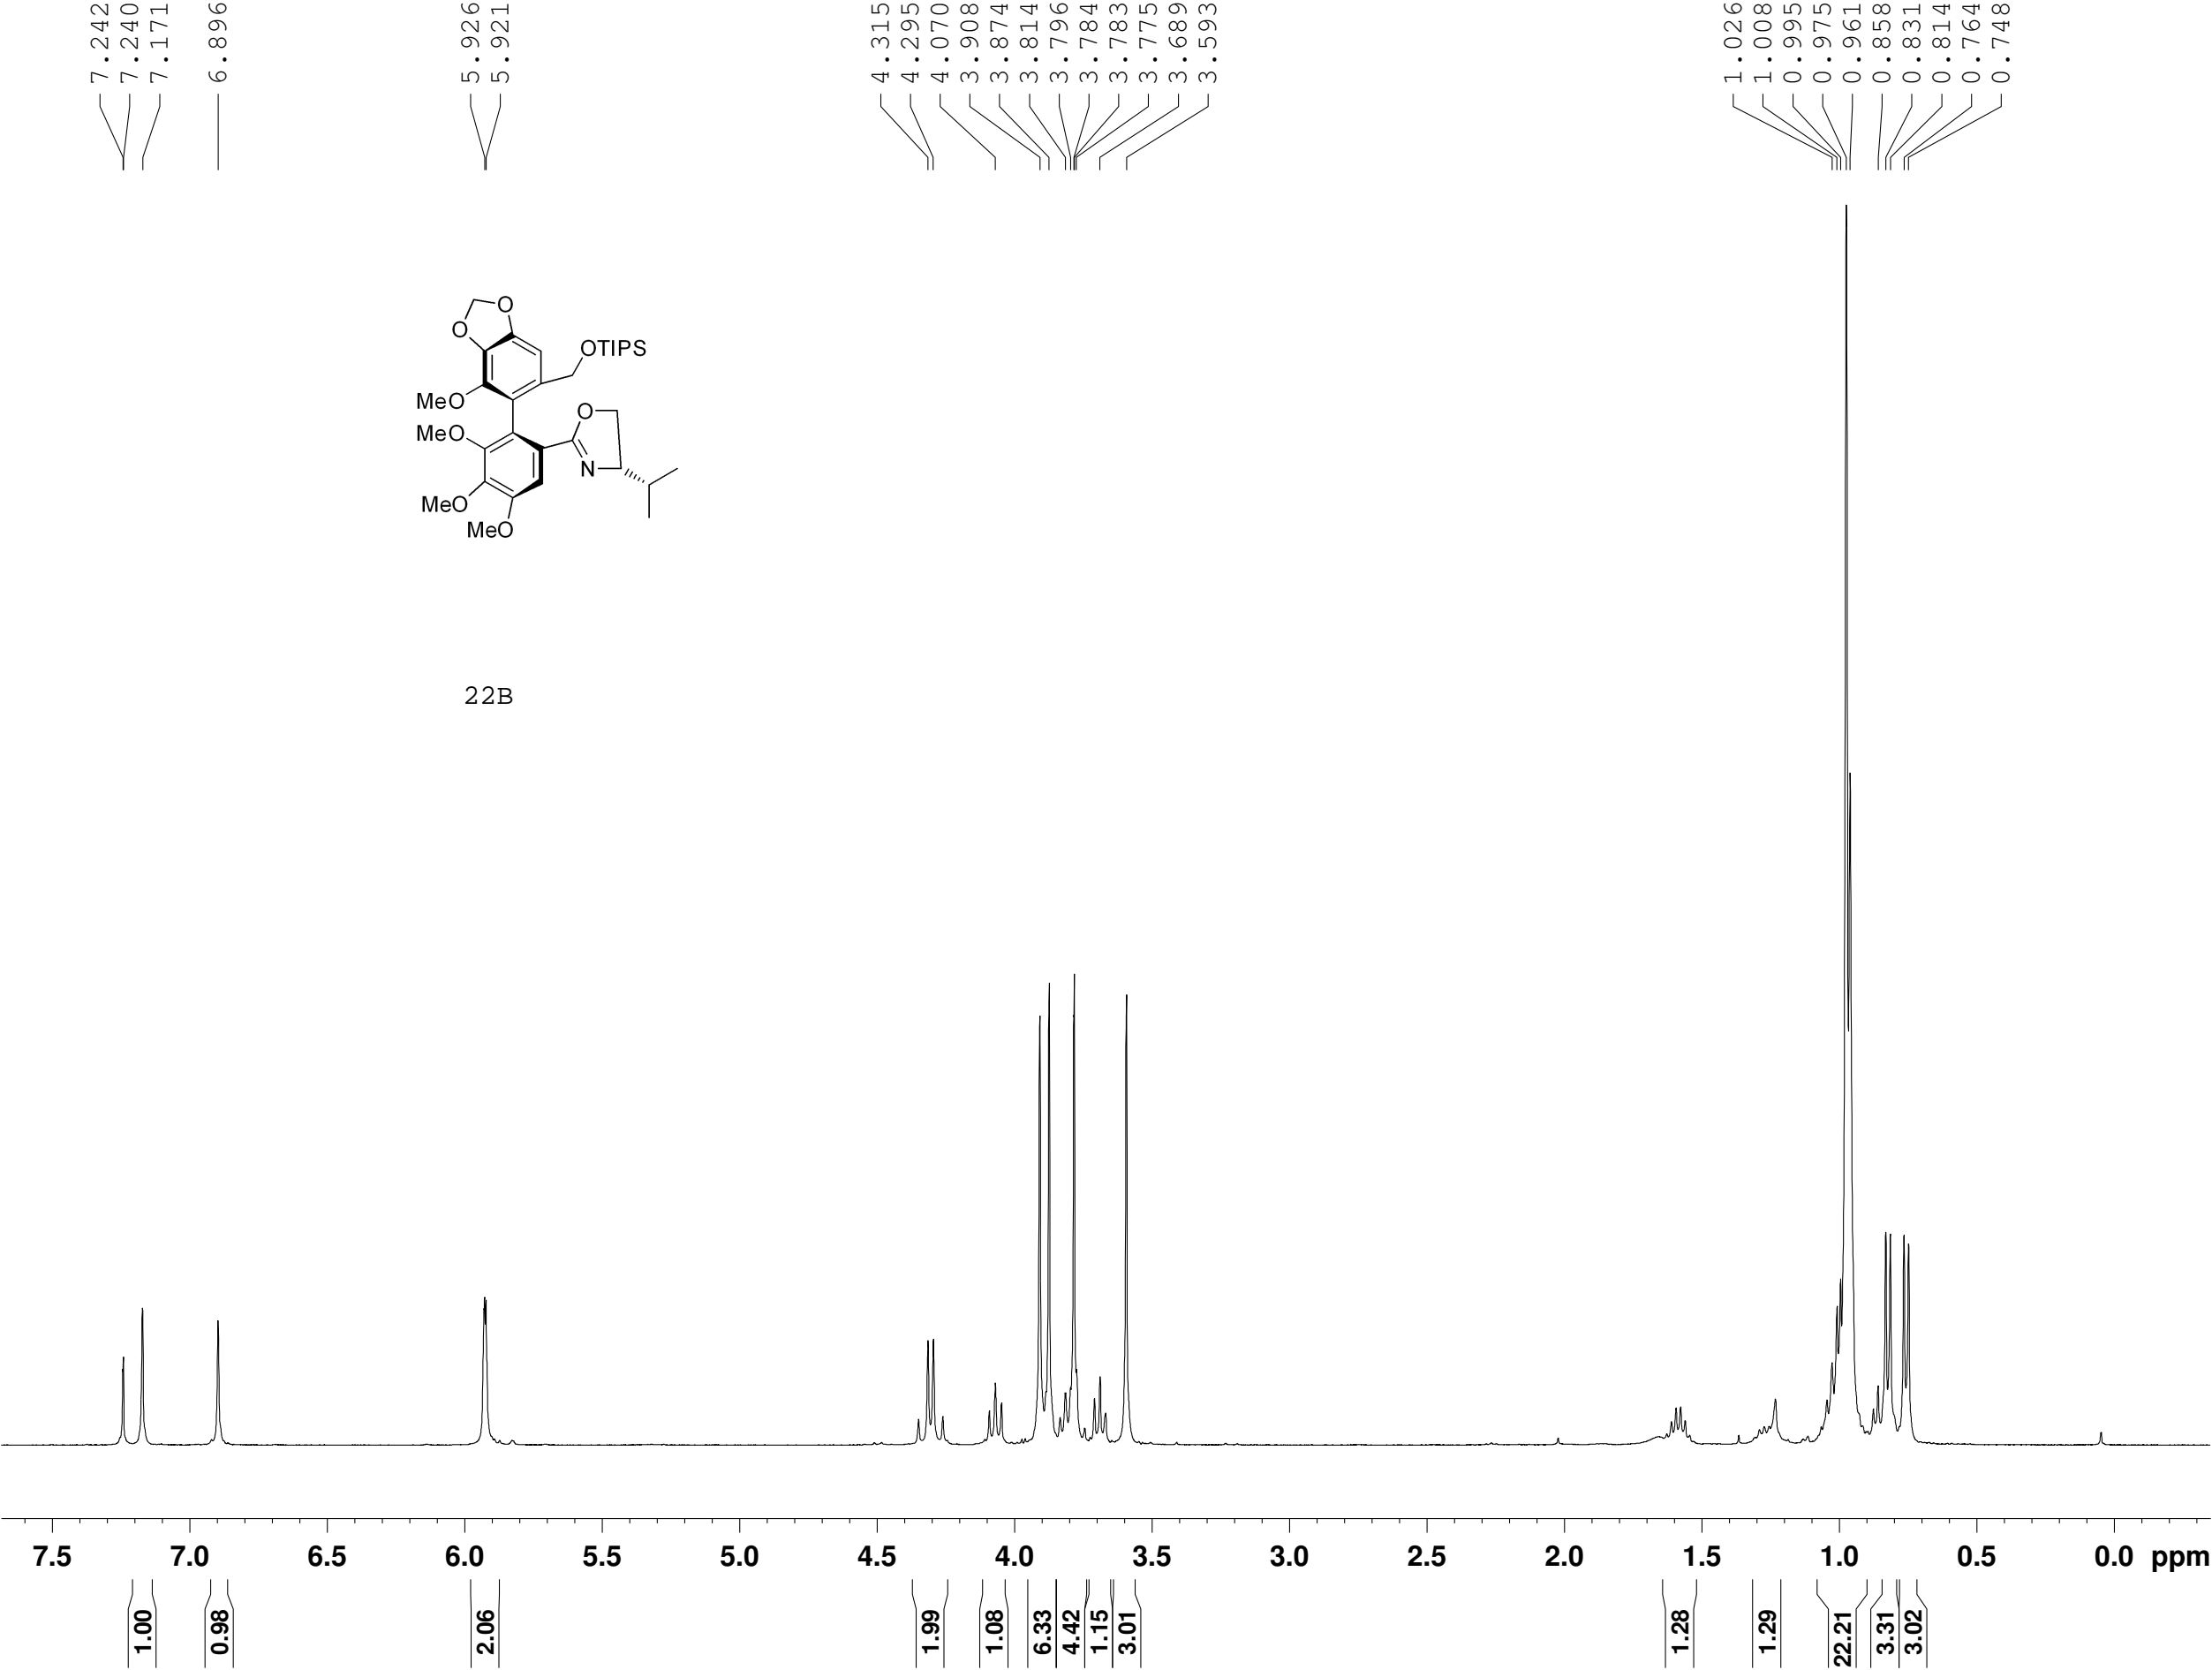

The Ohio State University  
Department of Chemistry  
NMR Facility  
400MHz – 0083

Current Data Parameters  
NAME Rs-2-89MP  
EXPNO 1  
PROCNO 1

F2 - Acquisition Parameters  
Date\_ 20080105  
Time 11.22  
INSTRUM spect  
PROBHD 5 mm QNP 1H/13  
PULPROG zg30  
TD 65536  
SOLVENT CDCl3  
NS 16  
DS 2  
SWH 8278.146 Hz  
FIDRES 0.126314 Hz  
AQ 3.9584243 sec  
RG 128  
DW 60.400 use  
DE 6.00 use  
TE 297.2 K  
D1 1.00000000 sec  
MCREST 0.00000000 sec  
MCWRK 0.01500000 sec

===== CHANNEL f1 =====  
NUC1 1H  
P1 13.00 use  
PL1 0.00 dB  
SFO1 400.1324710 MHz

F2 - Processing parameters  
SI 32768  
SF 400.1300176 MHz  
WDW EM  
SSB 0  
LB 0.30 Hz  
GB 0  
PC 1.00

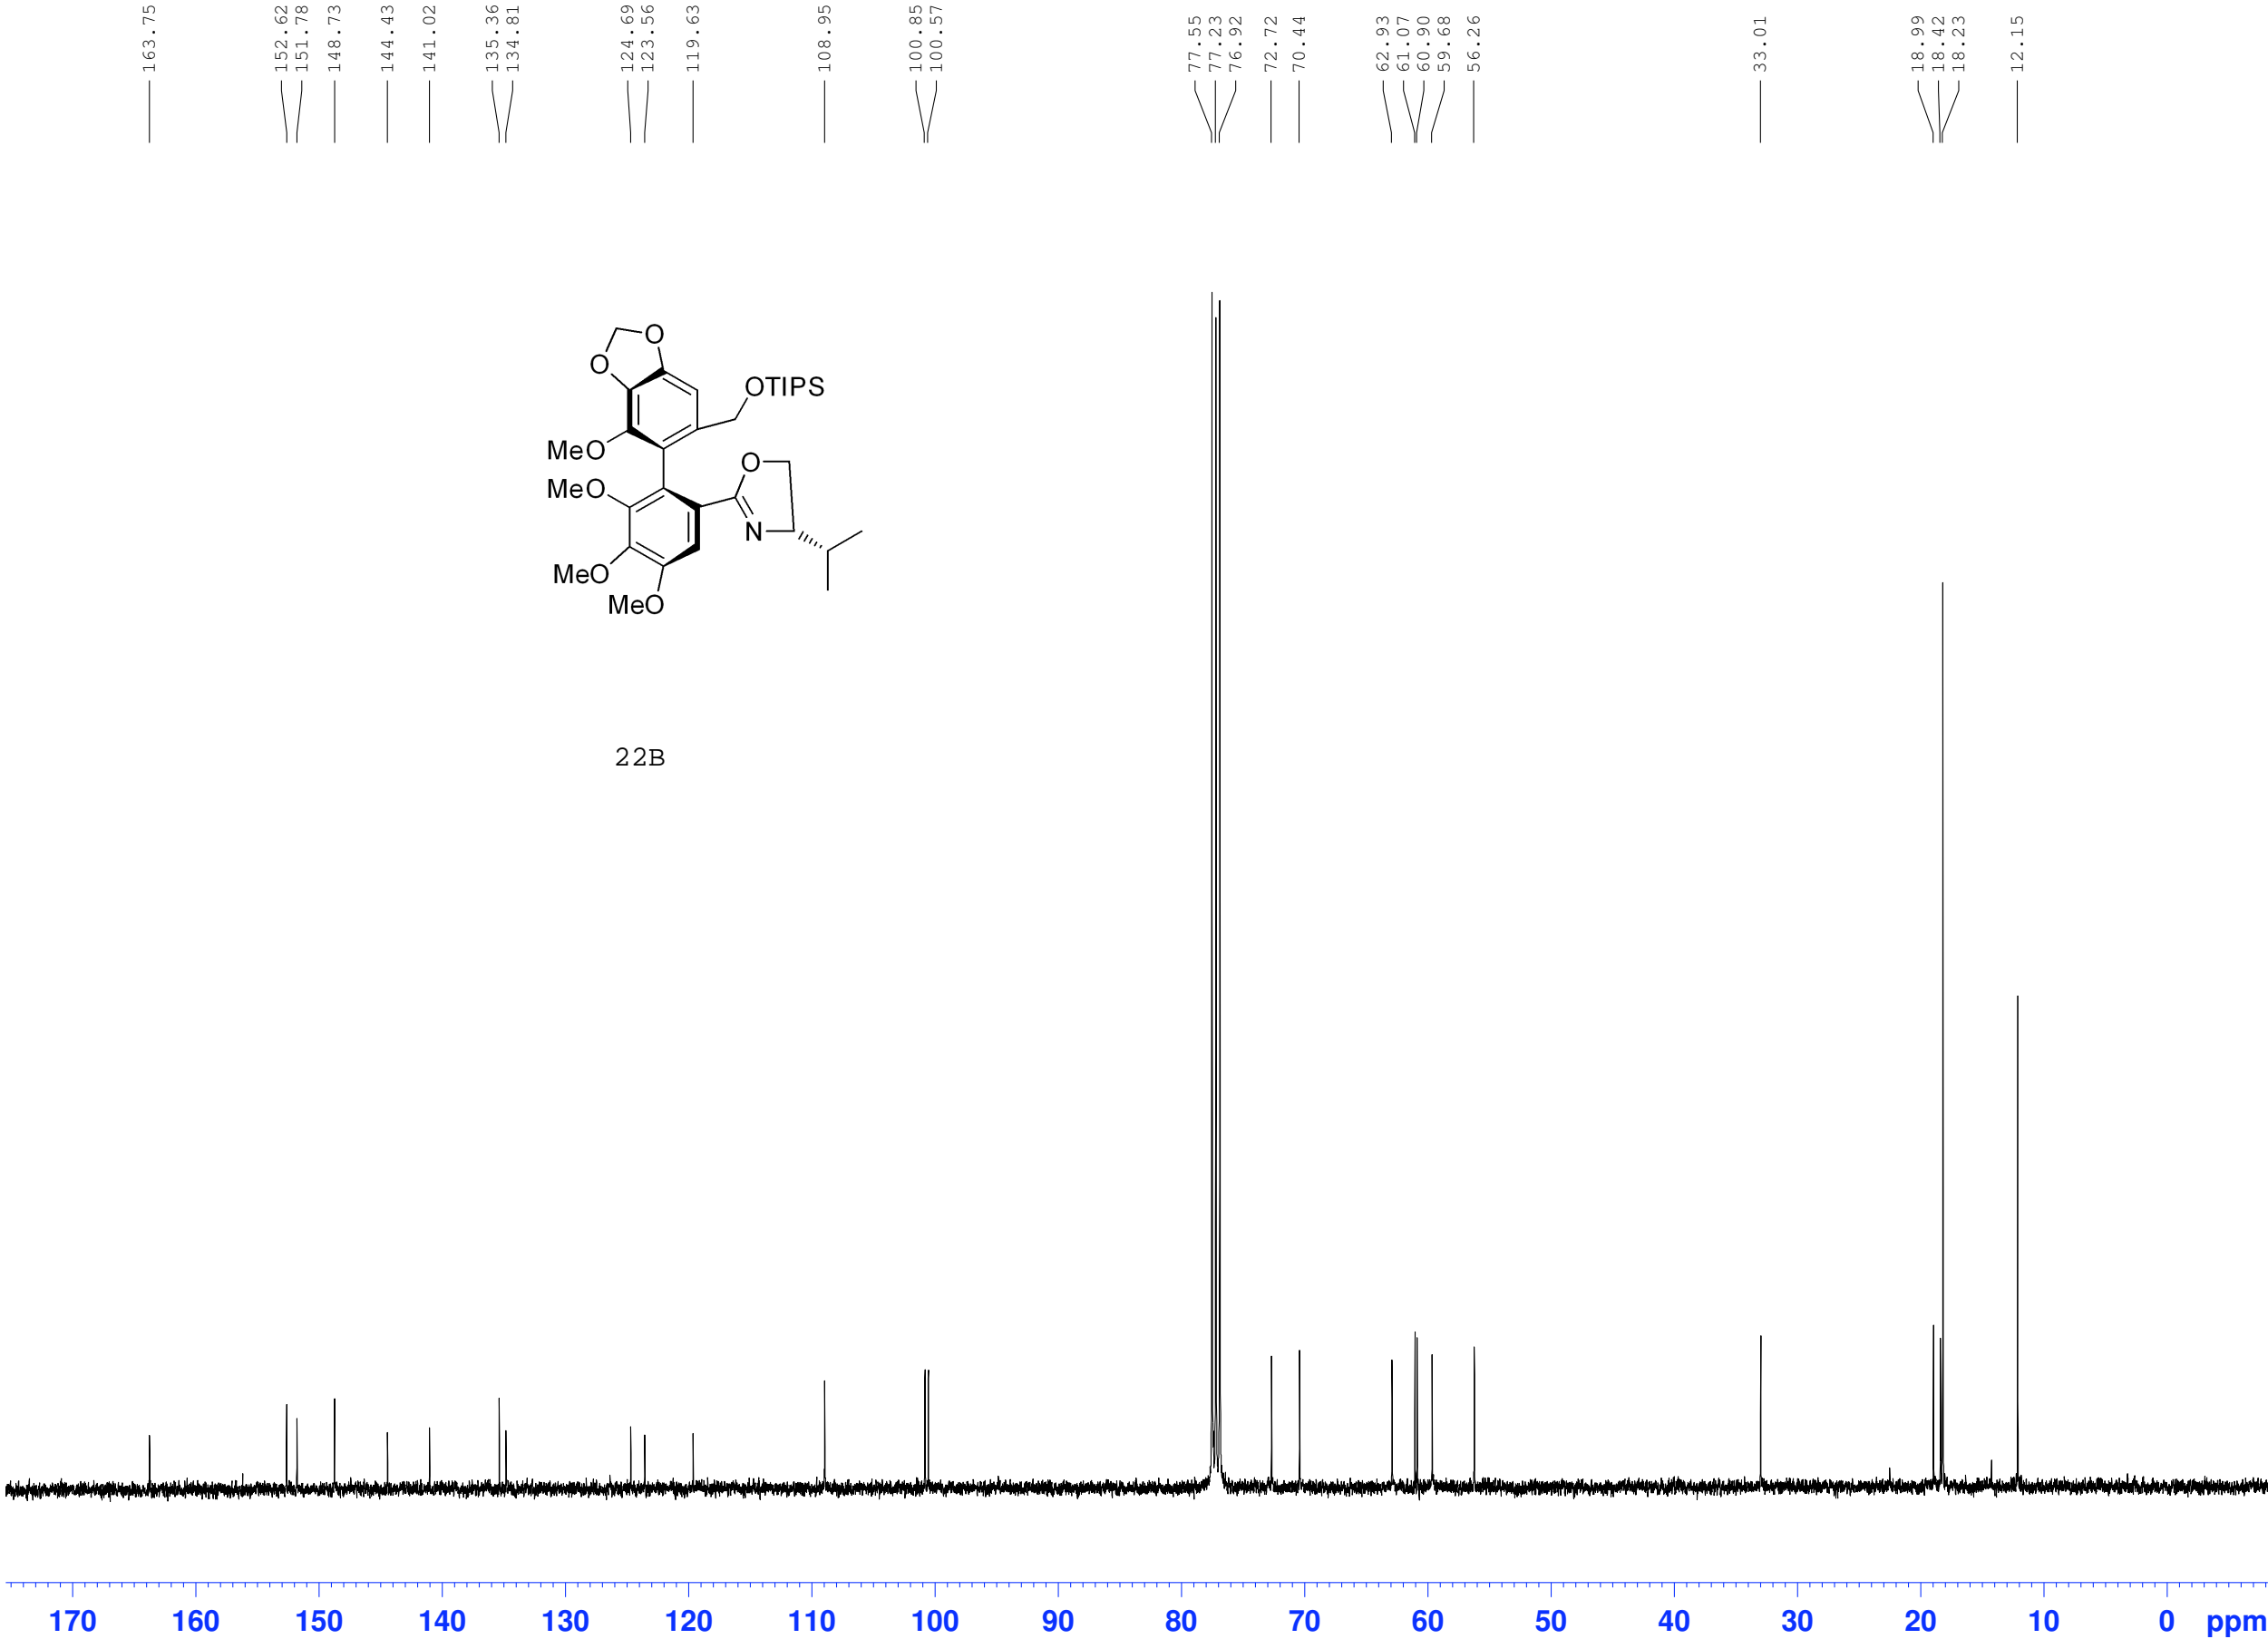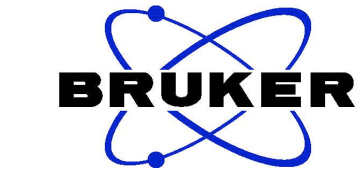

Current Data Parameters  
NAME Rs-2-89MP  
EXPNO 2  
PROCNO 1

F2 - Acquisition Parameters  
Date\_ 20080105  
Time 11.28  
INSTRUM spect  
PROBHD 5 mm QNP 1H/13  
PULPROG zgpg30  
TD 65536  
SOLVENT CDC13  
NS 1000  
DS 4  
SWH 23980.814 Hz  
FIDRES 0.365918 Hz  
AQ 1.3664756 sec  
RG 13004  
DW 20.850 use  
DE 6.00 use  
TE 298.2 K  
D1 2.00000000 sec  
d11 0.03000000 sec  
DELTA 1.89999998 sec  
MCREST 0.00000000 sec  
MCWRK 0.01500000 sec

===== CHANNEL f1 =====  
NUC1 13C  
P1 10.50 use  
PL1 0.00 dB  
SFO1 100.6228298 MHz

===== CHANNEL f2 =====  
CPDPRG2 waltz16  
NUC2 1H  
PCPD2 80.00 use  
PL2 -6.00 dB  
PL12 14.56 dB  
PL13 16.50 dB  
SFO2 400.1316005 MHz

F2 - Processing parameters  
SI 32768  
SF 100.6127483 MHz  
WDW EM  
SSB 0  
LB 1.00 Hz  
GB 0  
PC 1.40

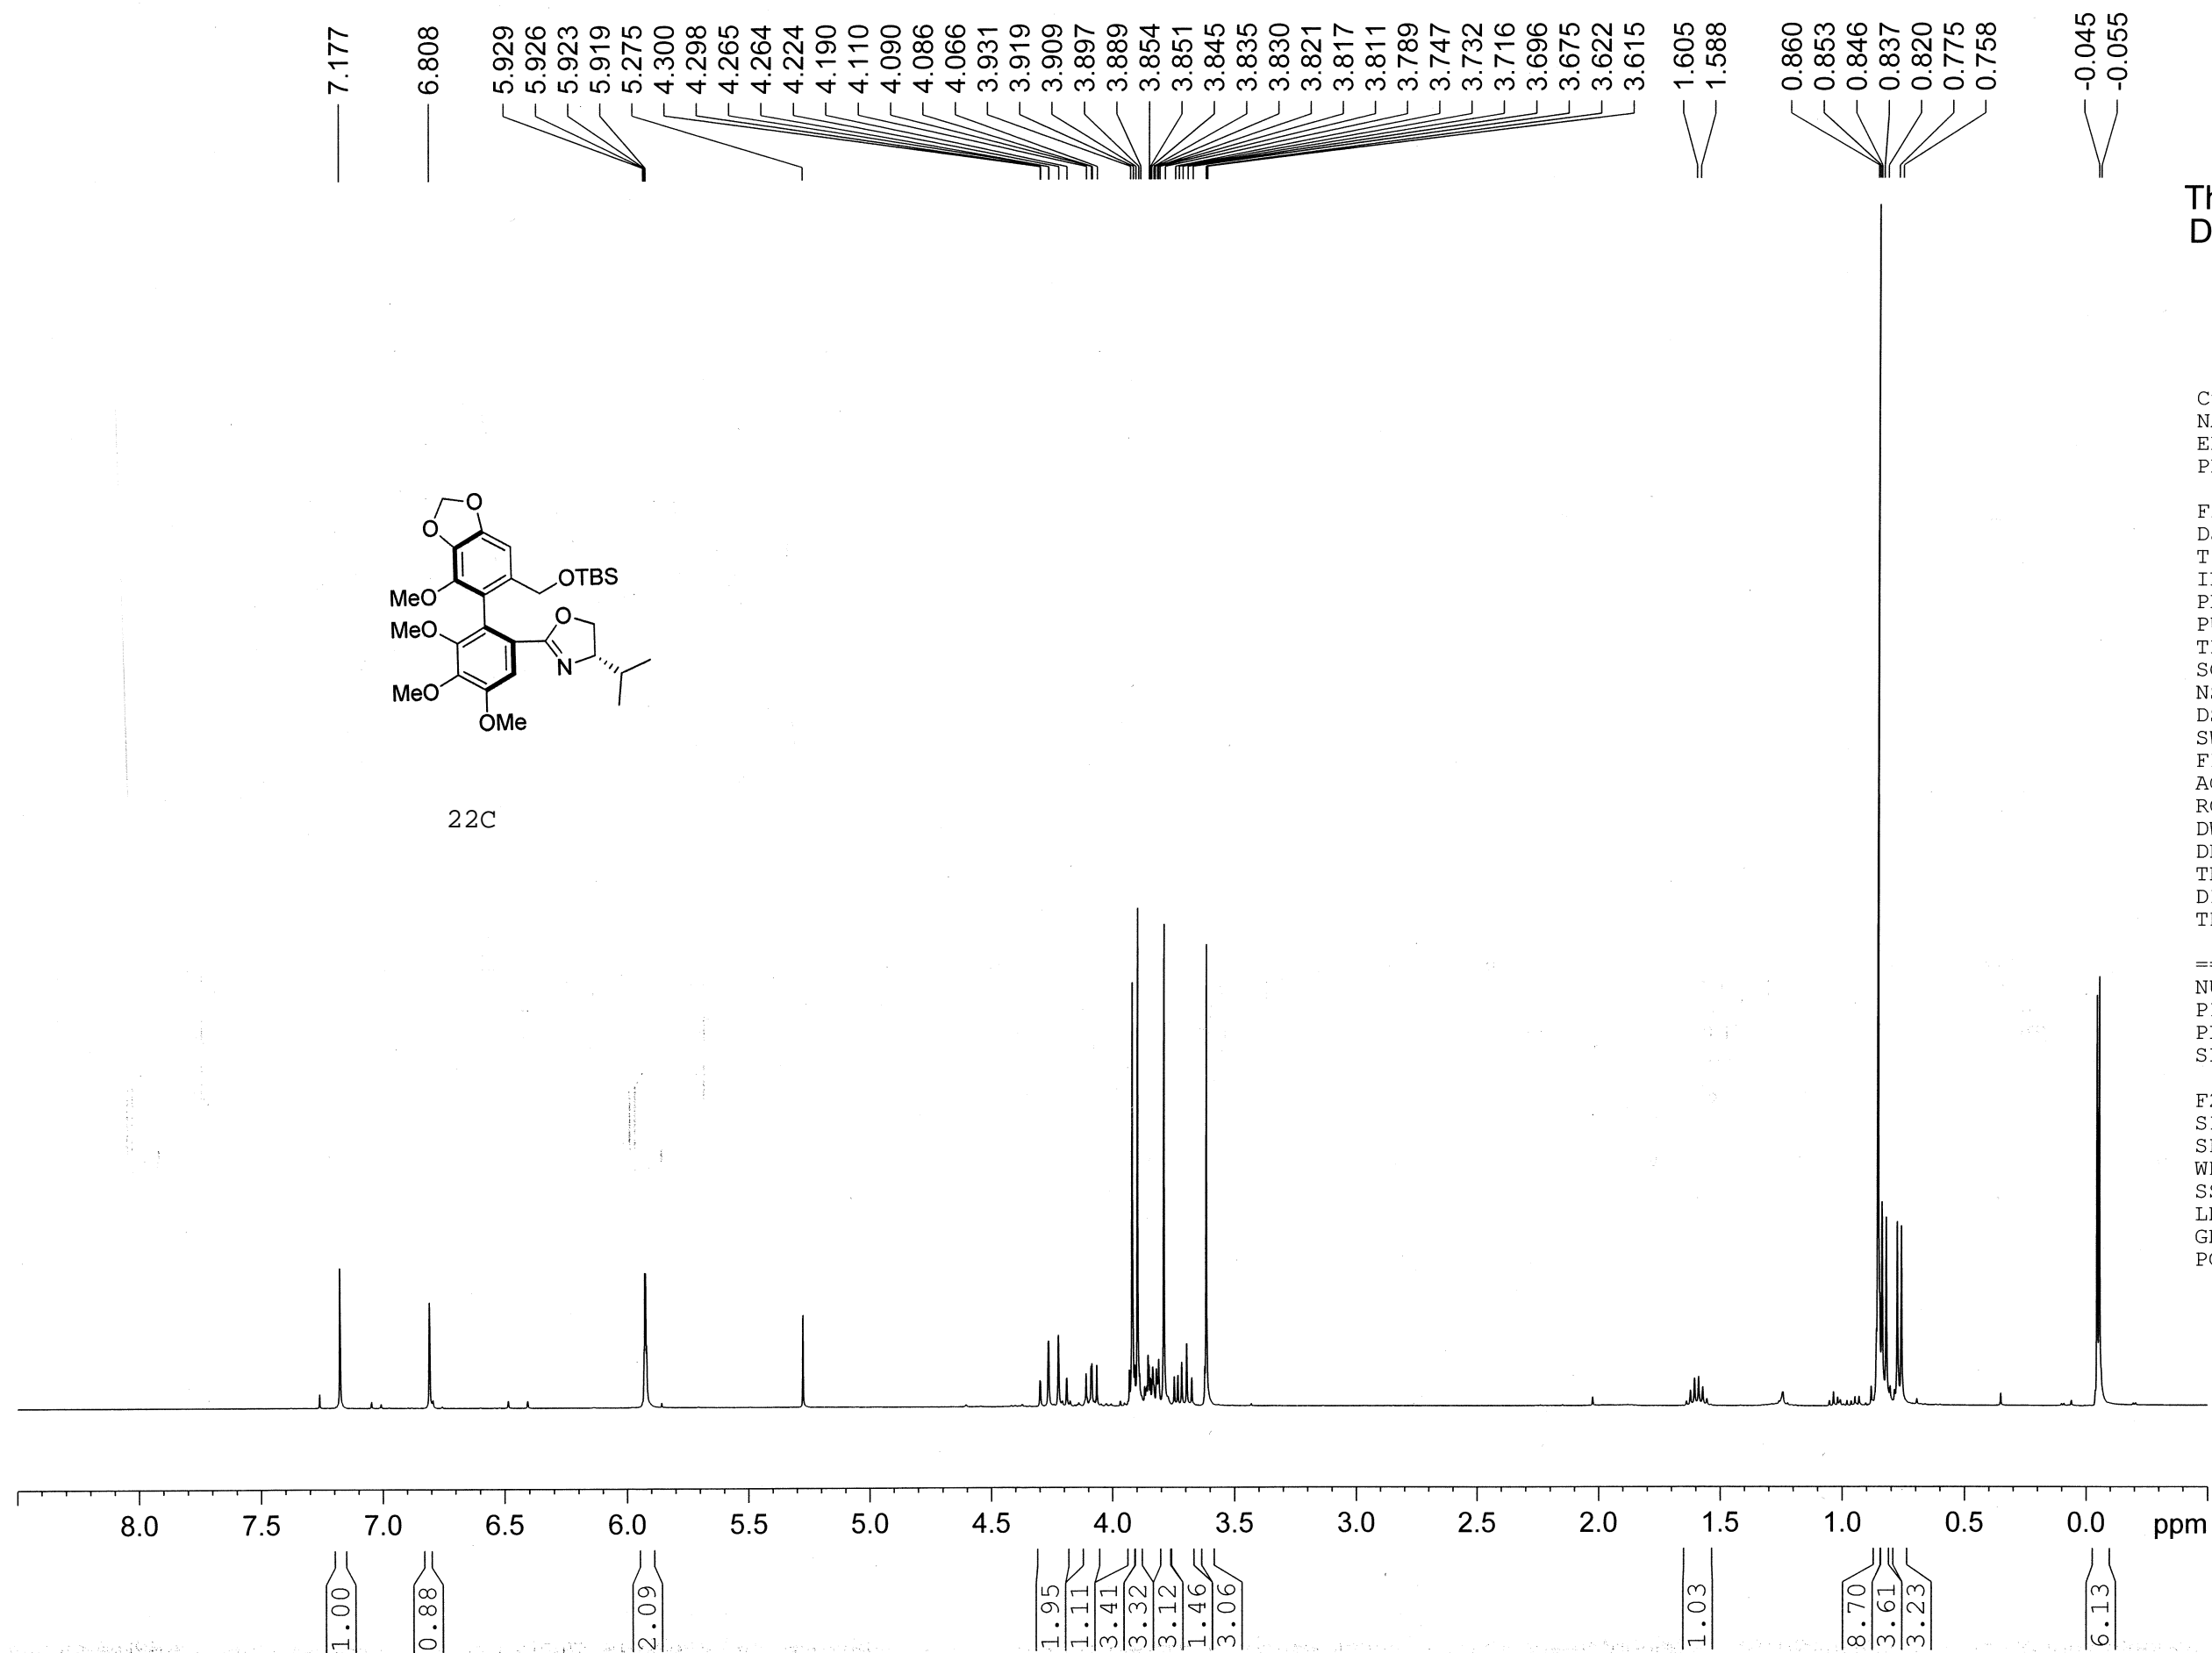

The Ohio State University  
Department of Chemistry  
NMR Facility

Current Data Parameters  
NAME Wgong-III-216  
EXPNO 470  
PROCNO 1

F2 - Acquisition Parameters  
Date\_ 20110429  
Time 14.54  
INSTRUM spect  
PROBHD 5 mm QNP 1H/13  
PULPROG zg30  
TD 65536  
SOLVENT CDCl3  
NS 16  
DS 2  
SWH 8278.146 Hz  
FIDRES 0.126314 Hz  
AQ 3.9584243 sec  
RG 45.3  
DW 60.400 usec  
DE 6.00 usec  
TE 300.2 K  
D1 1.00000000 sec  
TD0 1

===== CHANNEL f1 =====  
NUC1 1H  
P1 14.50 usec  
PL1 0.00 dB  
SFO1 400.1324710 MHz

F2 - Processing parameters  
SI 32768  
SF 400.130093 MHz  
WDW EM  
SSB 0  
LB 0.30 Hz  
GB 0  
PC 1.00

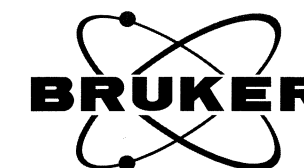

Current Data Parameters  
NAME Wgong-III-216 C13  
EXPNO 501  
PROCNO 1

F2 - Acquisition Parameters  
Date\_ 20110517  
Time\_ 16.51  
INSTRUM spect  
PROBHD 5 mm QNP 1H/13  
PULPROG zgpg30  
TD 65536  
SOLVENT CDCl3  
NS 92  
DS 4  
SWH 23980.814 Hz  
FIDRES 0.365918 Hz  
AQ 1.3664756 sec  
RG 1149.4  
DW 20.850 usec  
DE 6.00 usec  
TE 300.2 K  
D1 2.00000000 sec  
d11 0.03000000 sec  
DELTA 1.89999998 sec  
TD0 1

===== CHANNEL f1 =====  
NUC1 13C  
P1 10.50 usec  
PL1 0.00 dB  
SFO1 100.6228298 MHz

===== CHANNEL f2 =====  
CPDPRG2 waltz16  
NUC2 1H  
PCPD2 80.00 usec  
PL2 -6.00 dB  
PL12 14.56 dB  
PL13 16.50 dB  
SFO2 400.1316005 MHz

F2 - Processing parameters  
SI 32768  
SF 100.6127690 MHz  
WDW EM  
SSB 0  
LB 1.00 Hz  
GB 0  
PC 1.40

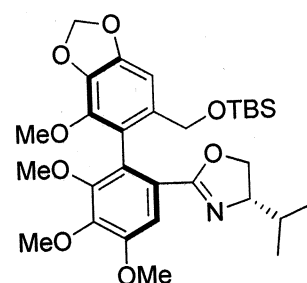

22C

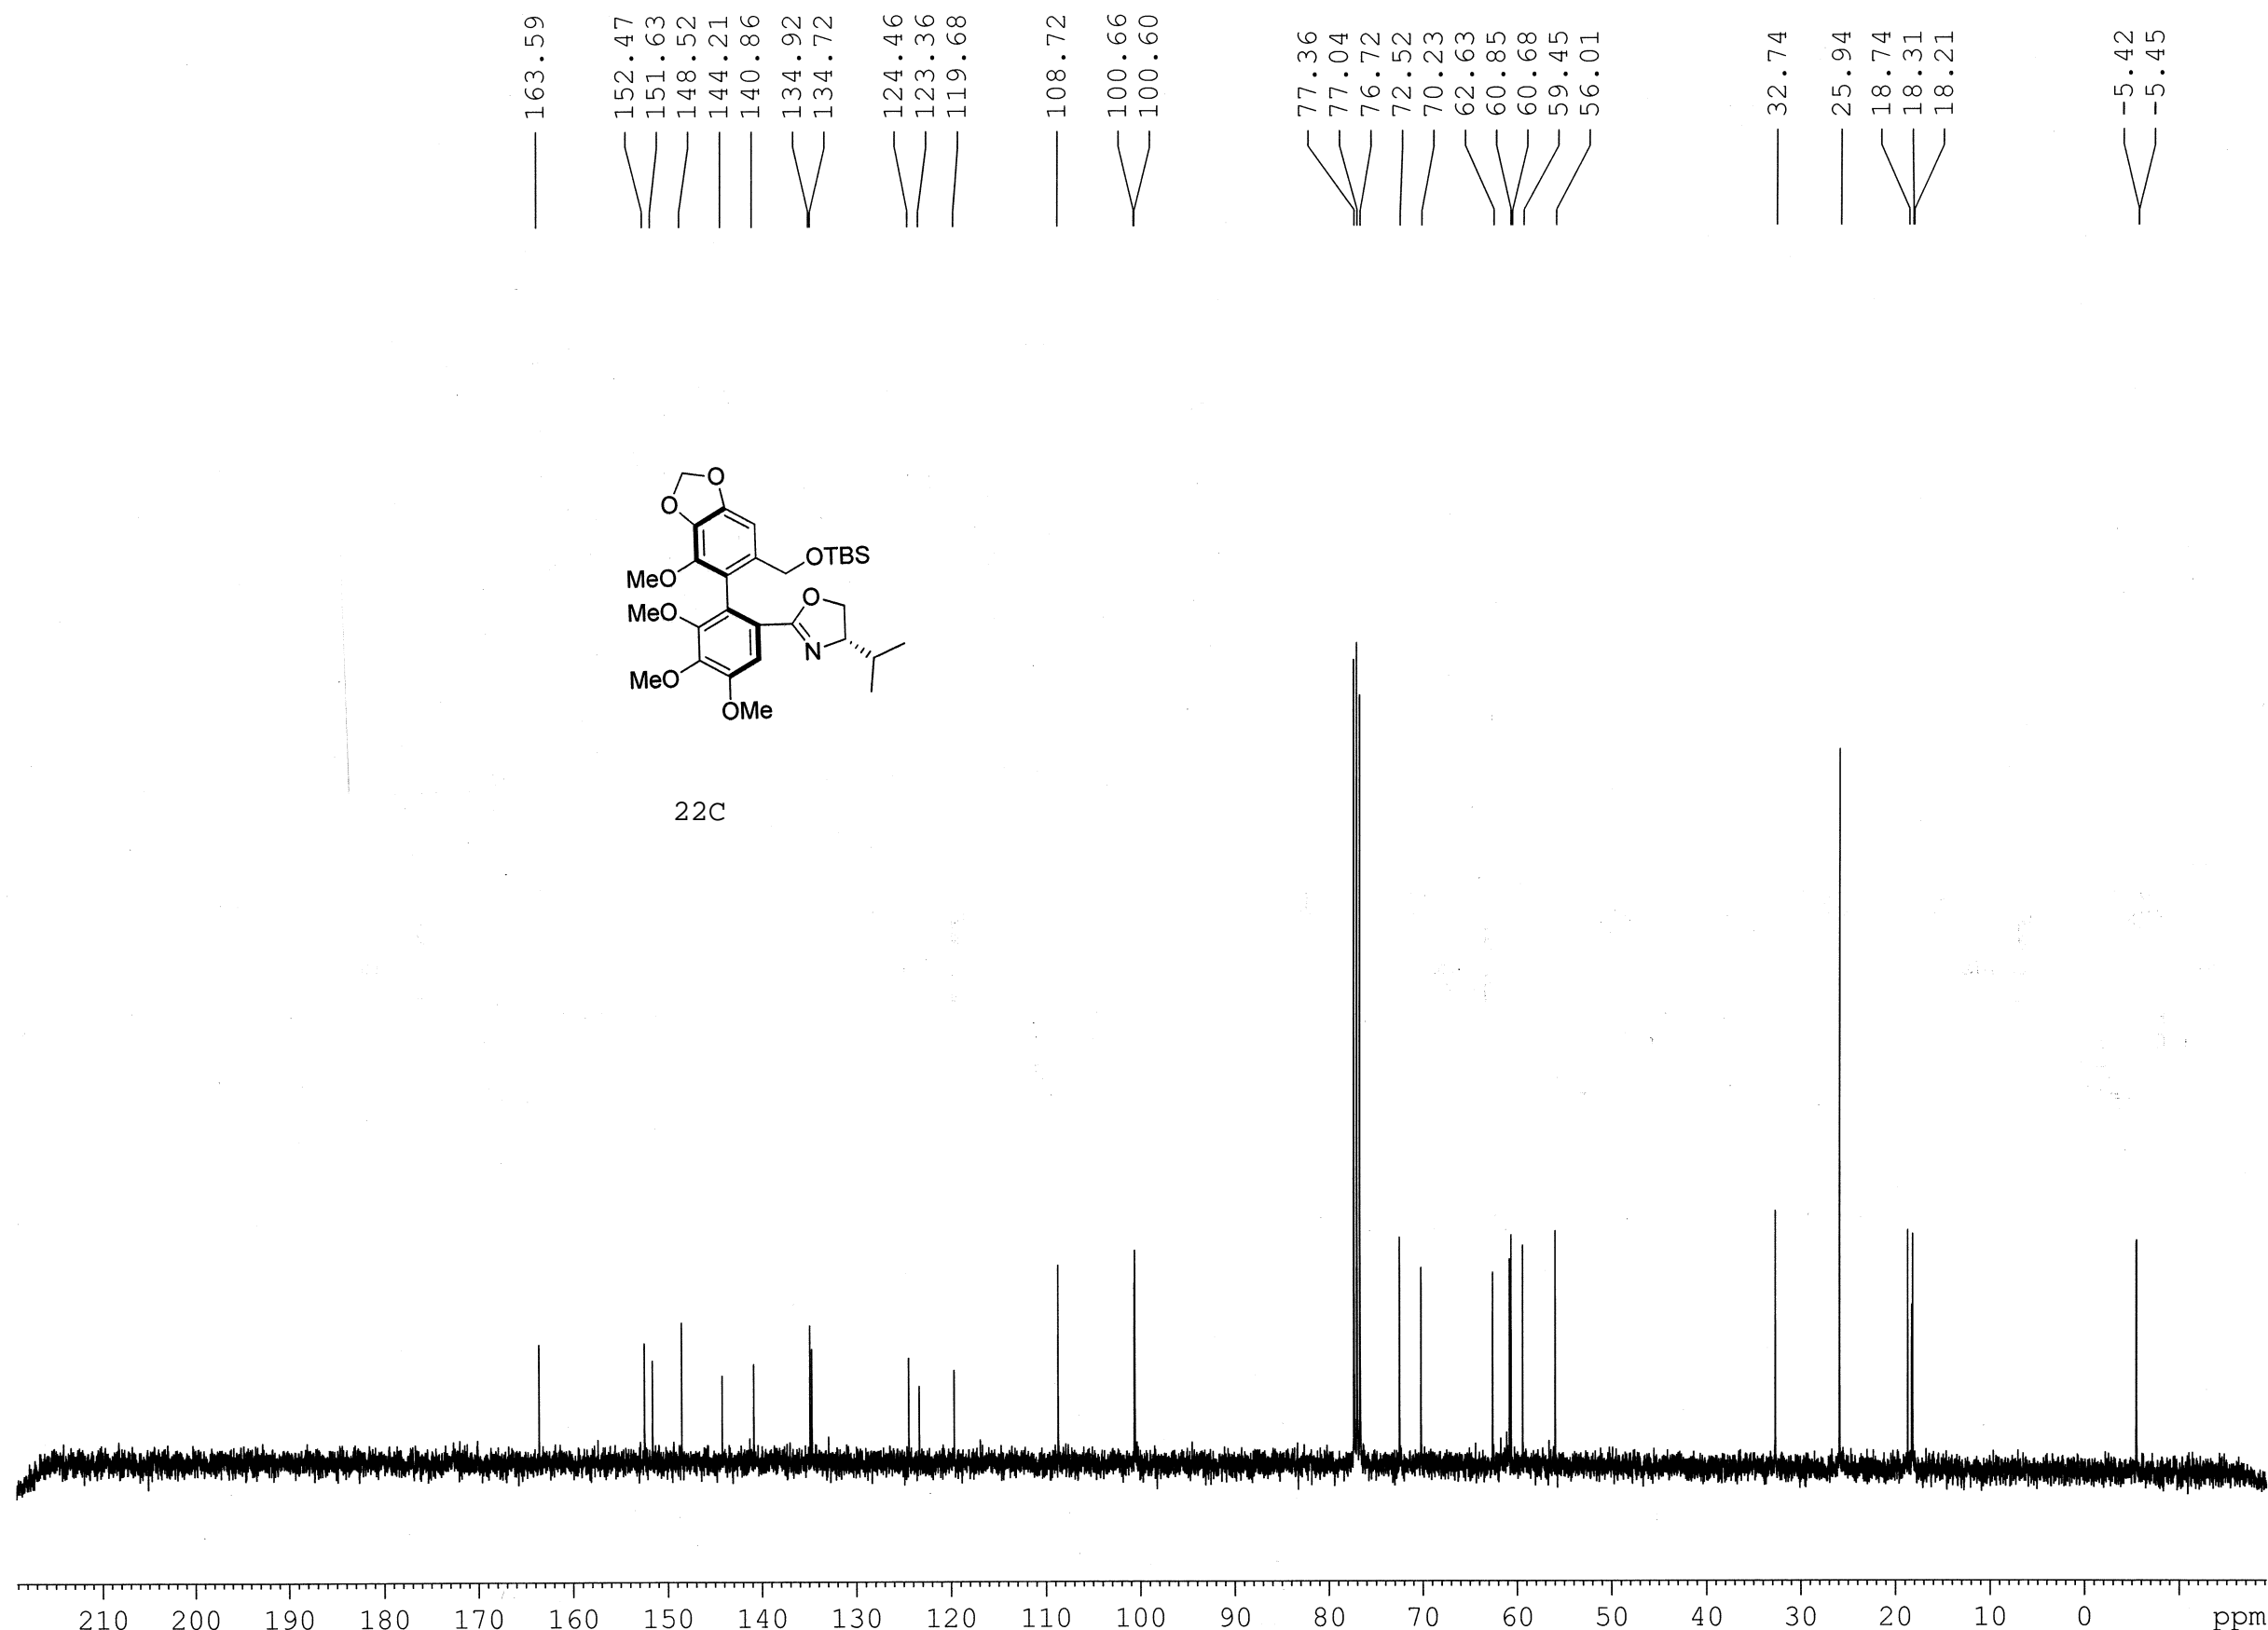

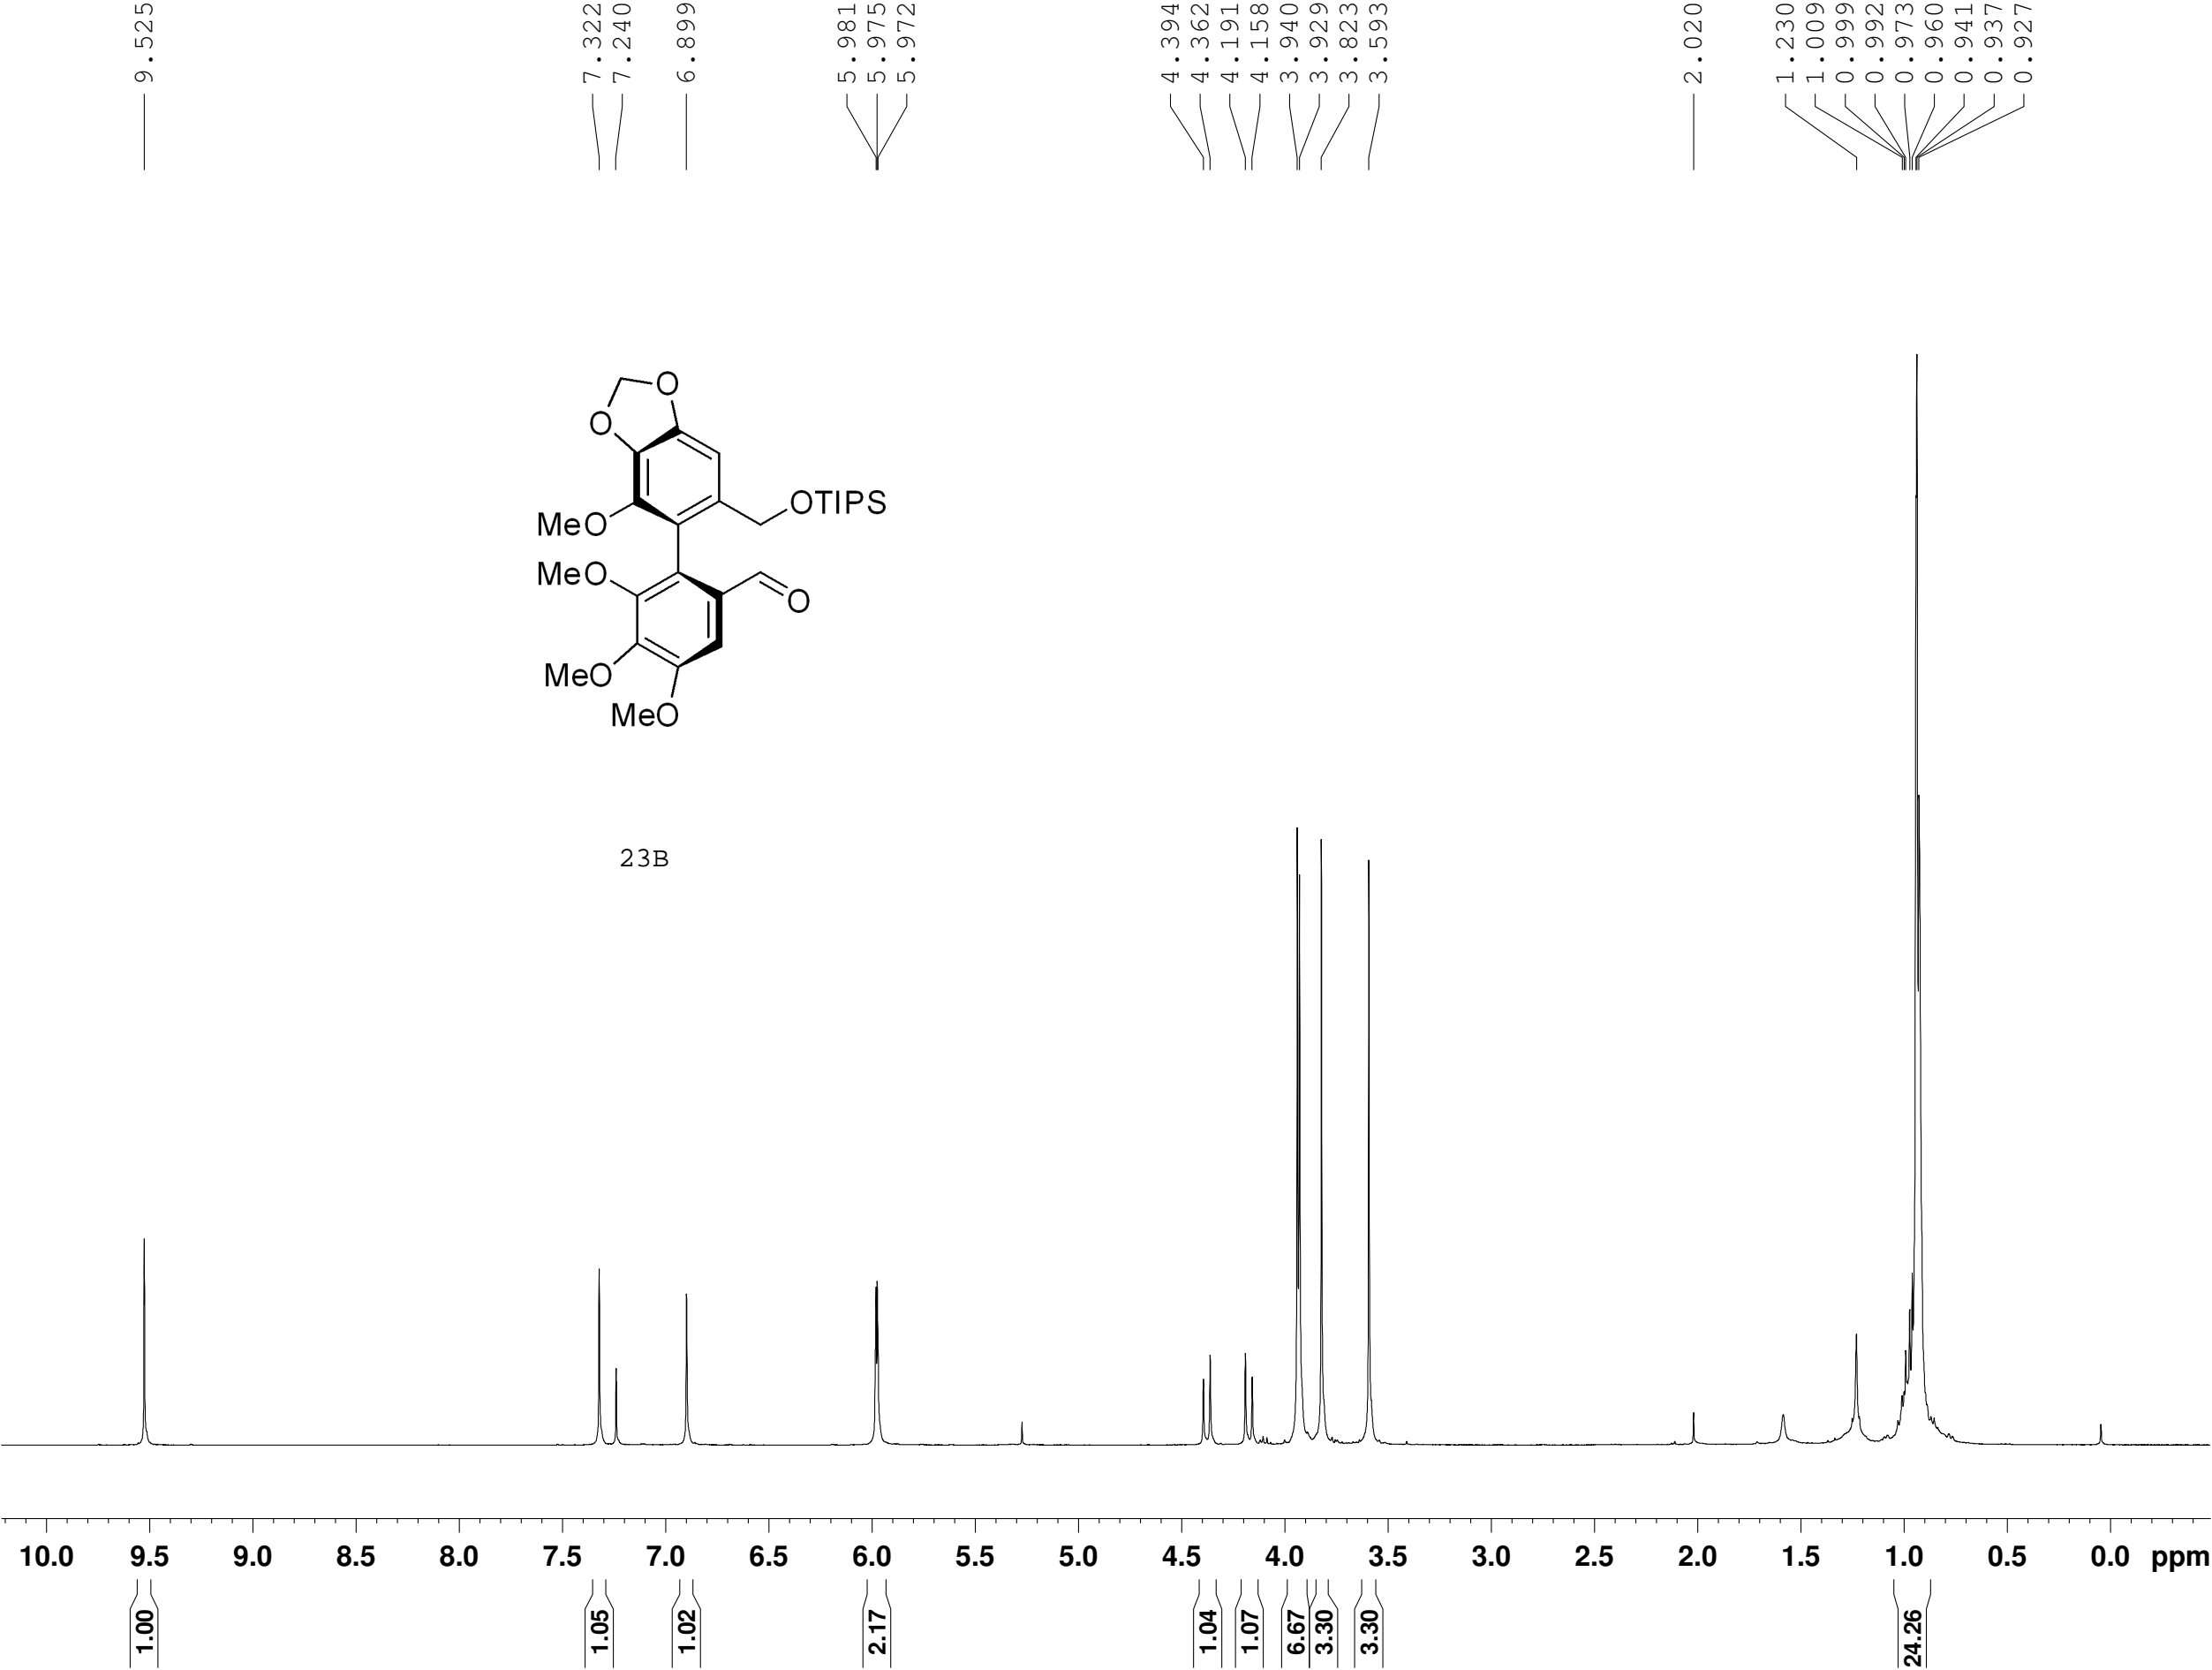

The Ohio State University  
Department of Chemistry  
NMR Facility  
400MHz – 0083

Current Data Parameters  
NAME Rs-2-90  
EXPNO 1  
PROCNO 1

F2 - Acquisition Parameters  
Date\_ 20080106  
Time 21.12  
INSTRUM spect  
PROBHD 5 mm QNP 1H/13  
PULPROG zg30  
TD 65536  
SOLVENT CDCl3  
NS 16  
DS 2  
SWH 8278.146 Hz  
FIDRES 0.126314 Hz  
AQ 3.9584243 sec  
RG 101.6  
DW 60.400 use  
DE 6.00 use  
TE 296.2 K  
D1 1.00000000 sec  
MCREST 0.00000000 sec  
MCWRK 0.01500000 sec

===== CHANNEL f1 =====  
NUC1 1H  
P1 13.00 use  
PL1 0.00 dB  
SFO1 400.1324710 MHz

F2 - Processing parameters  
SI 32768  
SF 400.1300181 MHz  
WDW EM  
SSB 0  
LB 0.30 Hz  
GB 0  
PC 1.00

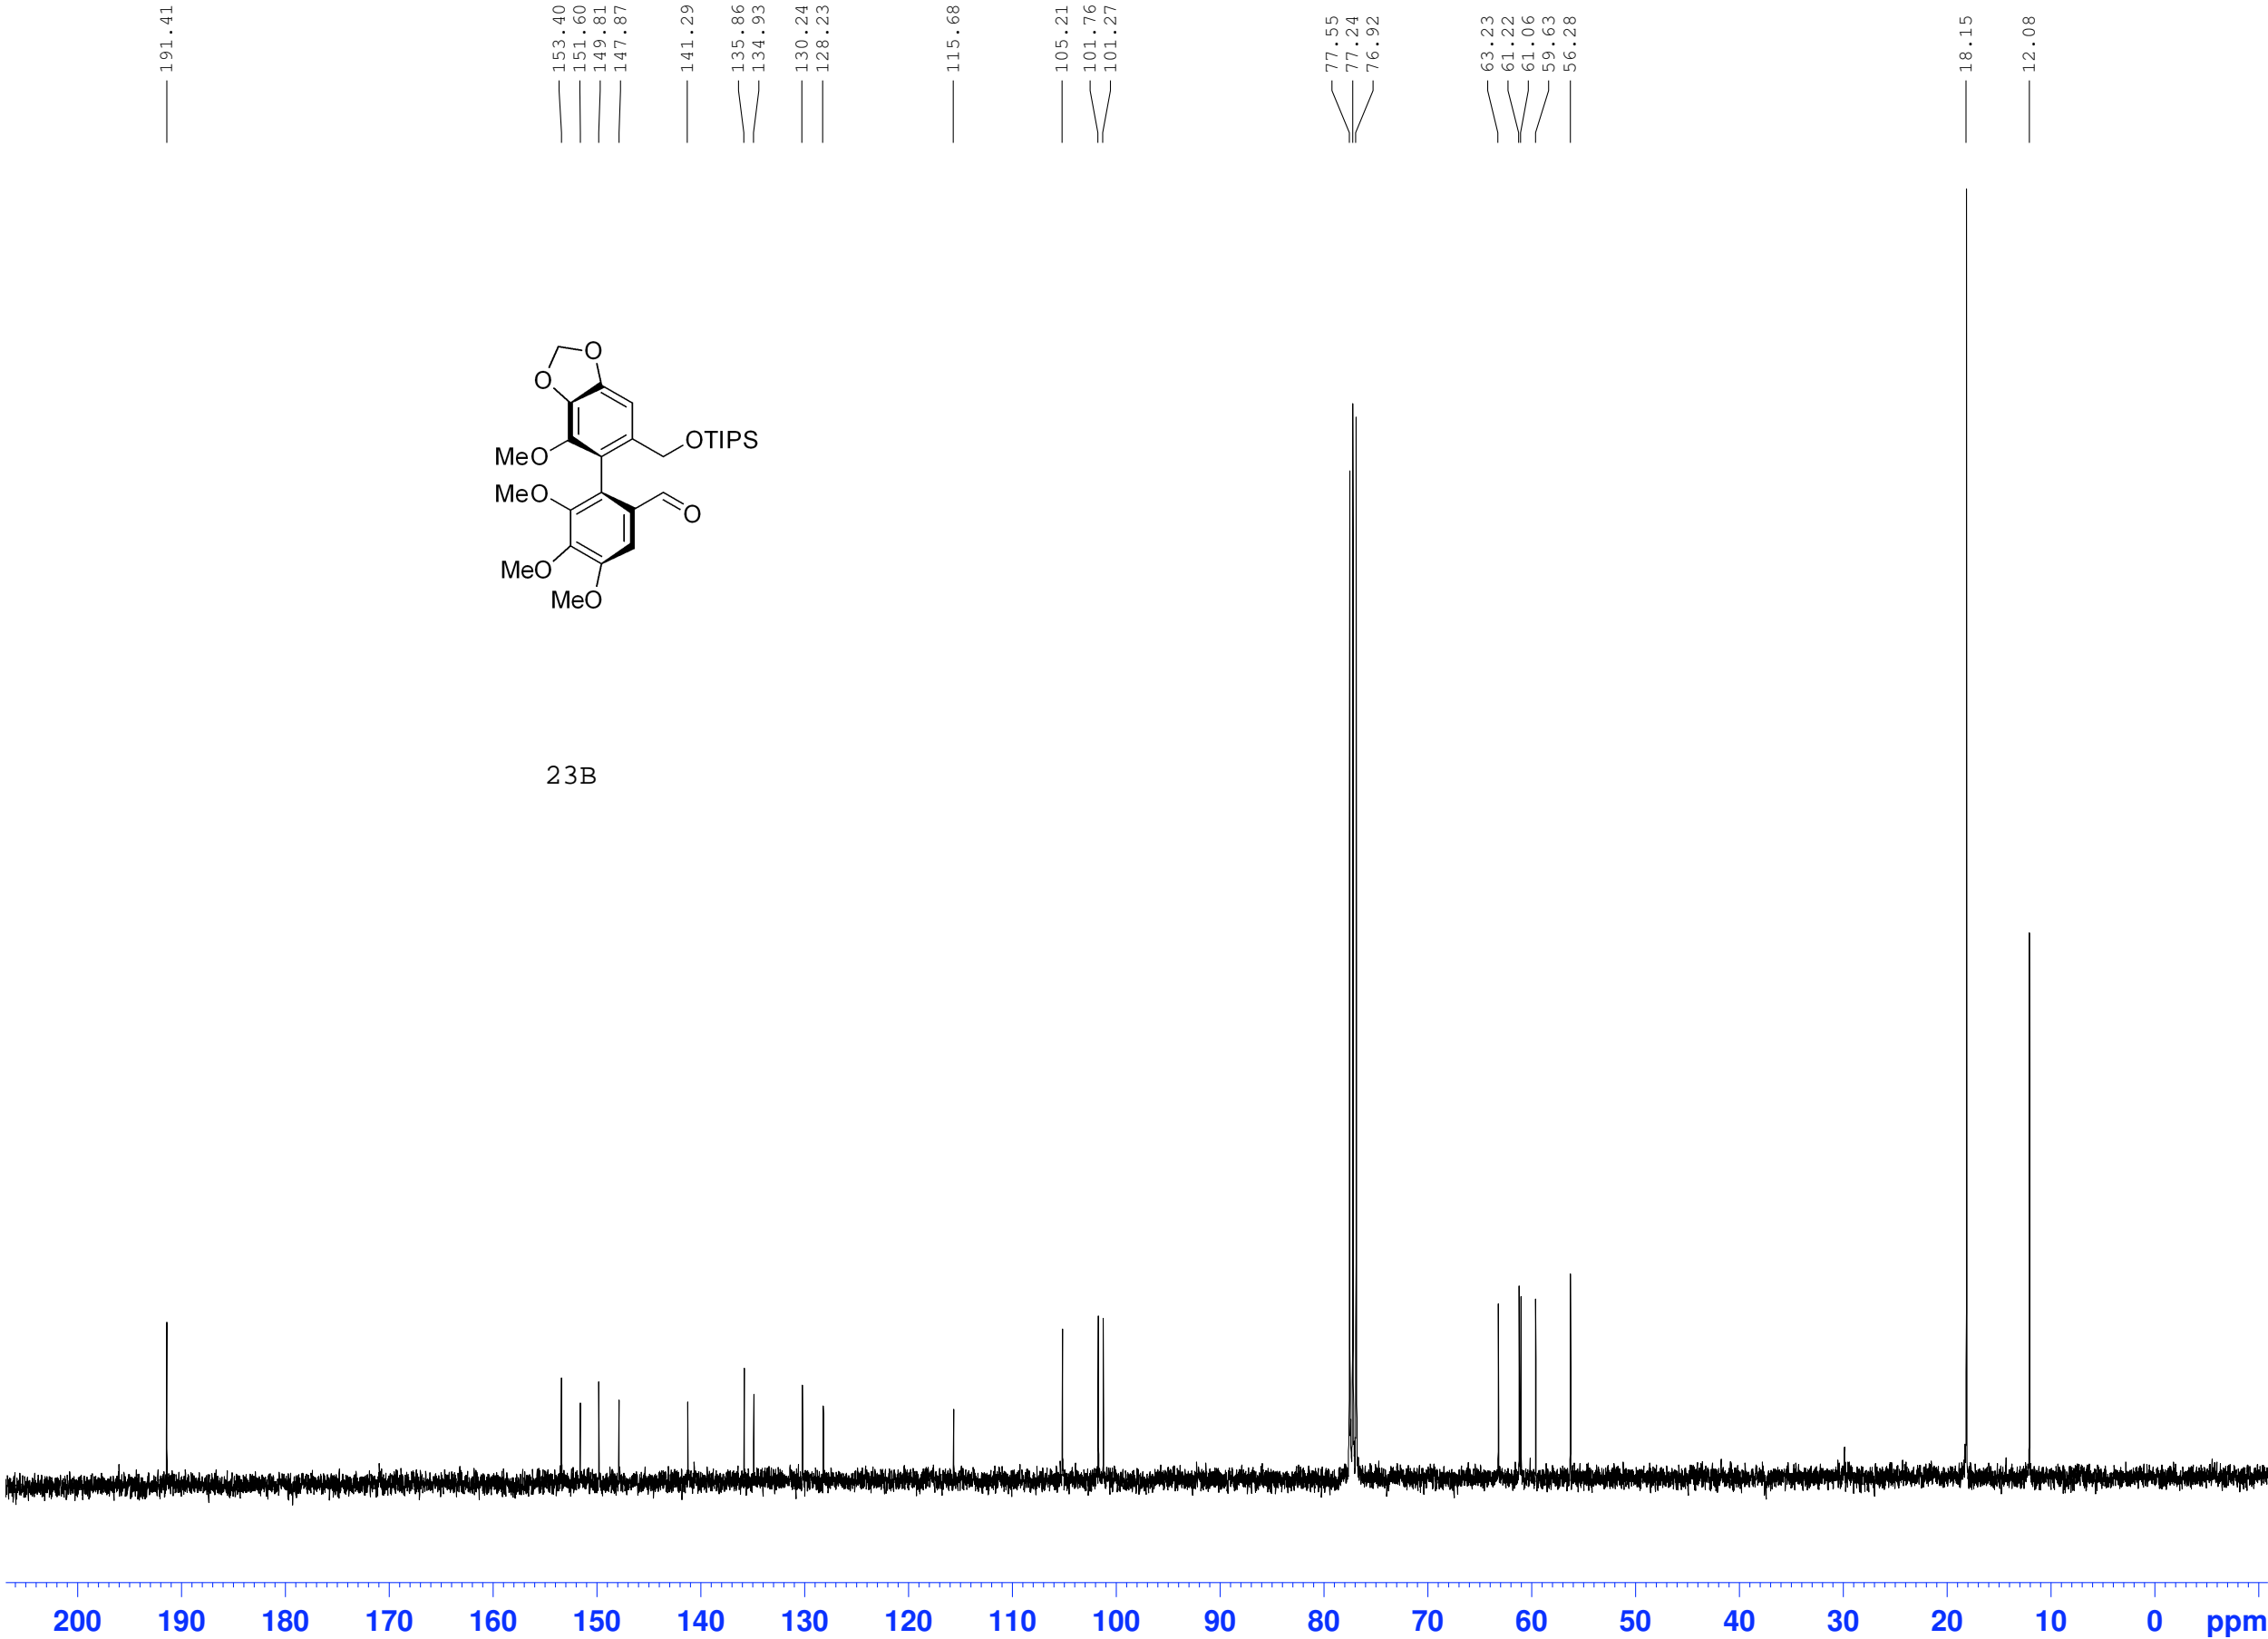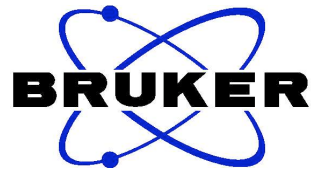

Current Data Parameters  
NAME Rs-2-90  
EXPNO 2  
PROCNO 1

F2 - Acquisition Parameters  
Date\_ 20080106  
Time 21.18  
INSTRUM spect  
PROBHD 5 mm QNP 1H/13  
PULPROG zgpg30  
TD 65536  
SOLVENT CDC13  
NS 354  
DS 4  
SWH 23980.814 Hz  
FIDRES 0.365918 Hz  
AQ 1.3664756 sec  
RG 3251  
DW 20.850 use  
DE 6.00 use  
TE 297.2 K  
D1 2.00000000 sec  
d11 0.03000000 sec  
DELTA 1.89999998 sec  
MCREST 0.00000000 sec  
MCWRK 0.01500000 sec

===== CHANNEL f1 =====  
NUC1 13C  
P1 10.50 use  
PL1 0.00 dB  
SFO1 100.6228298 MHz

===== CHANNEL f2 =====  
CPDPRG2 waltz16  
NUC2 1H  
PCPD2 80.00 use  
PL2 -6.00 dB  
PL12 14.56 dB  
PL13 16.50 dB  
SFO2 400.1316005 MHz

F2 - Processing parameters  
SI 32768  
SF 100.6127483 MHz  
WDW EM  
SSB 0  
LB 1.00 Hz  
GB 0  
PC 1.40

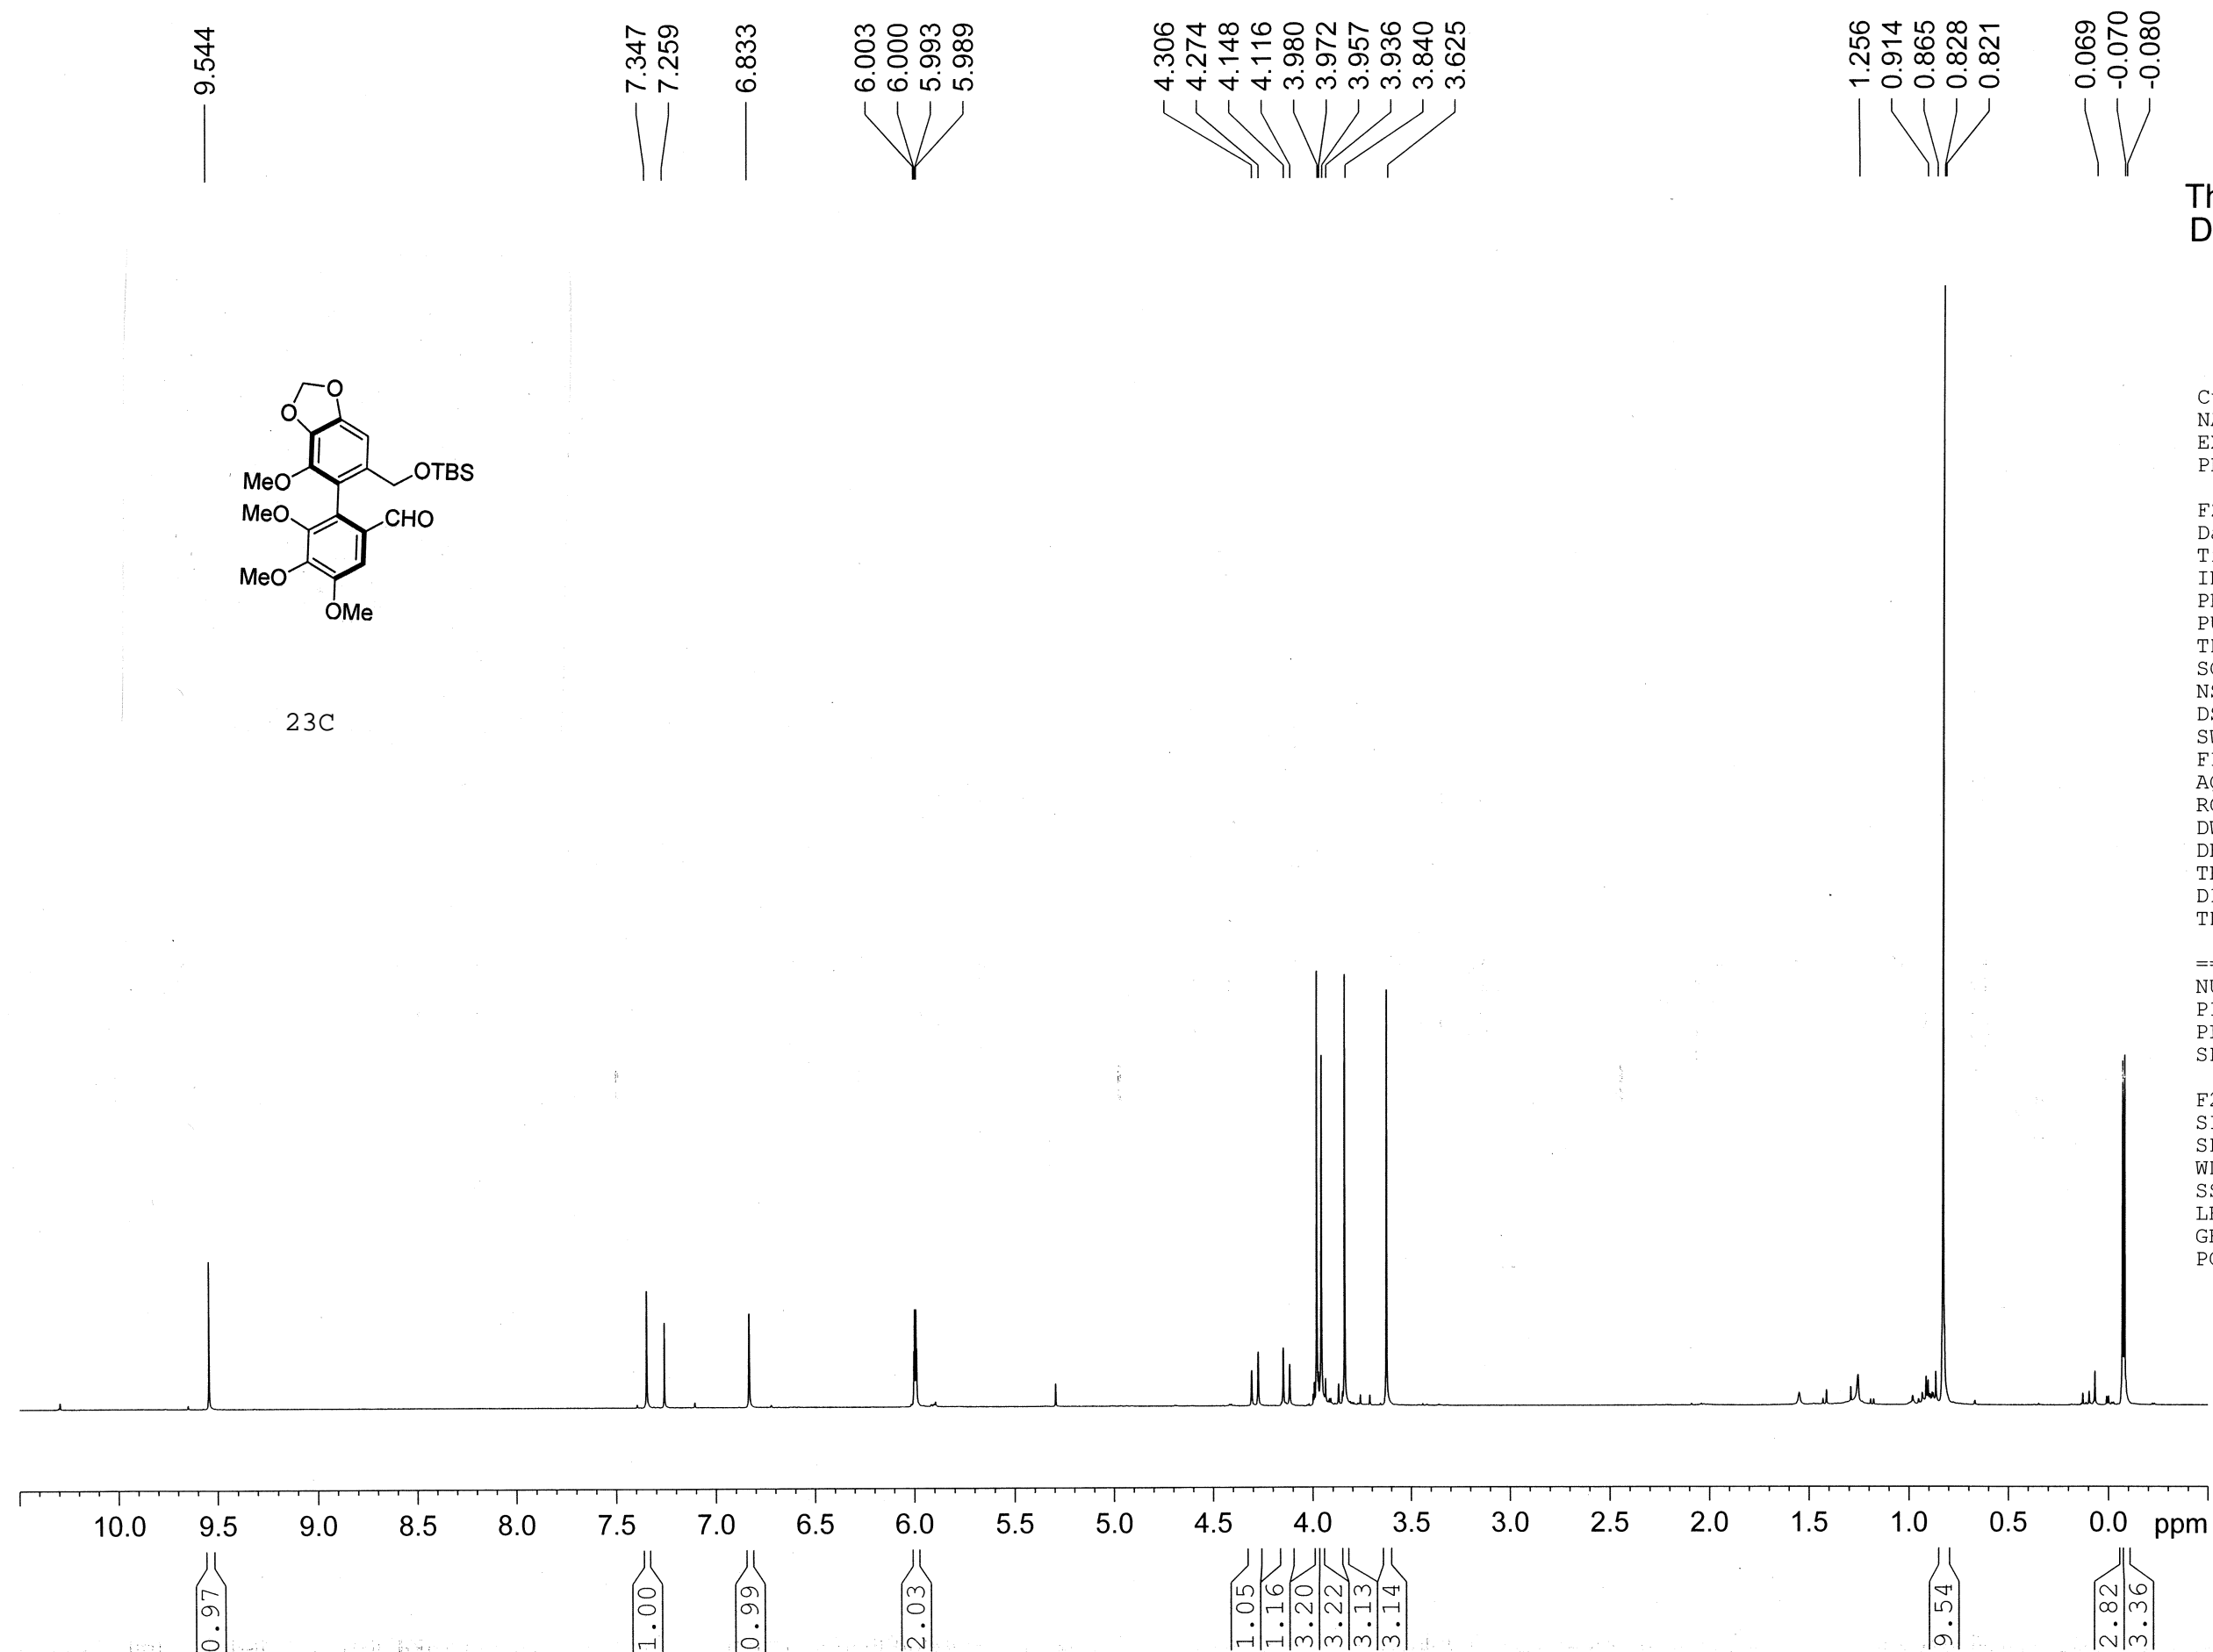

The Ohio State University  
Department of Chemistry  
NMR Facility

Current Data Parameters  
NAME Wgong-III-223  
EXPNO 475  
PROCNO 1

F2 - Acquisition Parameters  
Date\_ 20110505  
Time\_ 12.18  
INSTRUM spect  
PROBHD 5 mm QNP 1H/13  
PULPROG zg30  
TD 65536  
SOLVENT CDCl3  
NS 16  
DS 2  
SWH 8278.146 Hz  
FIDRES 0.126314 Hz  
AQ 3.9584243 sec  
RG 181  
DW 60.400 usec  
DE 6.00 usec  
TE 300.2 K  
D1 1.00000000 sec  
TD0 1

===== CHANNEL f1 =====  
NUC1 1H  
P1 14.50 usec  
PL1 0.00 dB  
SFO1 400.1324710 MHz

F2 - Processing parameters  
SI 32768  
SF 400.1300098 MHz  
WDW EM  
SSB 0  
LB 0.30 Hz  
GB 0  
PC 1.00

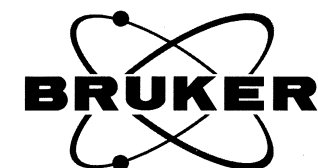

Current Data Parameters  
NAME Wgong-III-223 C13  
EXPNO 534  
PROCNO 1

F2 - Acquisition Parameters  
Date\_ 20110526  
Time\_ 8.44  
INSTRUM spect  
PROBHD 5 mm QNP 1H/13  
PULPROG zgpg30  
TD 65536  
SOLVENT CDC13  
NS 267  
DS 4  
SWH 23980.814 Hz  
FIDRES 0.365918 Hz  
AQ 1.3664756 sec  
RG 1625.5  
DW 20.850 usec  
DE 6.00 usec  
TE 300.2 K  
D1 2.00000000 sec  
d11 0.03000000 sec  
DELTA 1.89999998 sec  
TD0 1

===== CHANNEL f1 =====  
NUC1 13C  
P1 10.50 usec  
PL1 0.00 dB  
SFO1 100.6228298 MHz

===== CHANNEL f2 =====  
CPDPRG2 waltz16  
NUC2 1H  
PCPD2 80.00 usec  
PL2 -6.00 dB  
PL12 14.56 dB  
PL13 16.50 dB  
SFO2 400.1316005 MHz

F2 - Processing parameters  
SI 32768  
SF 100.6127690 MHz  
WDW EM  
SSB 0  
LB 1.00 Hz  
GB 0  
PC 1.40

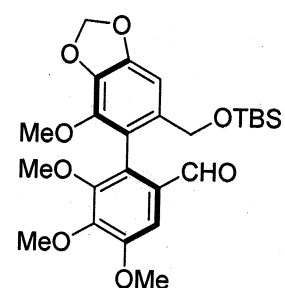

23C

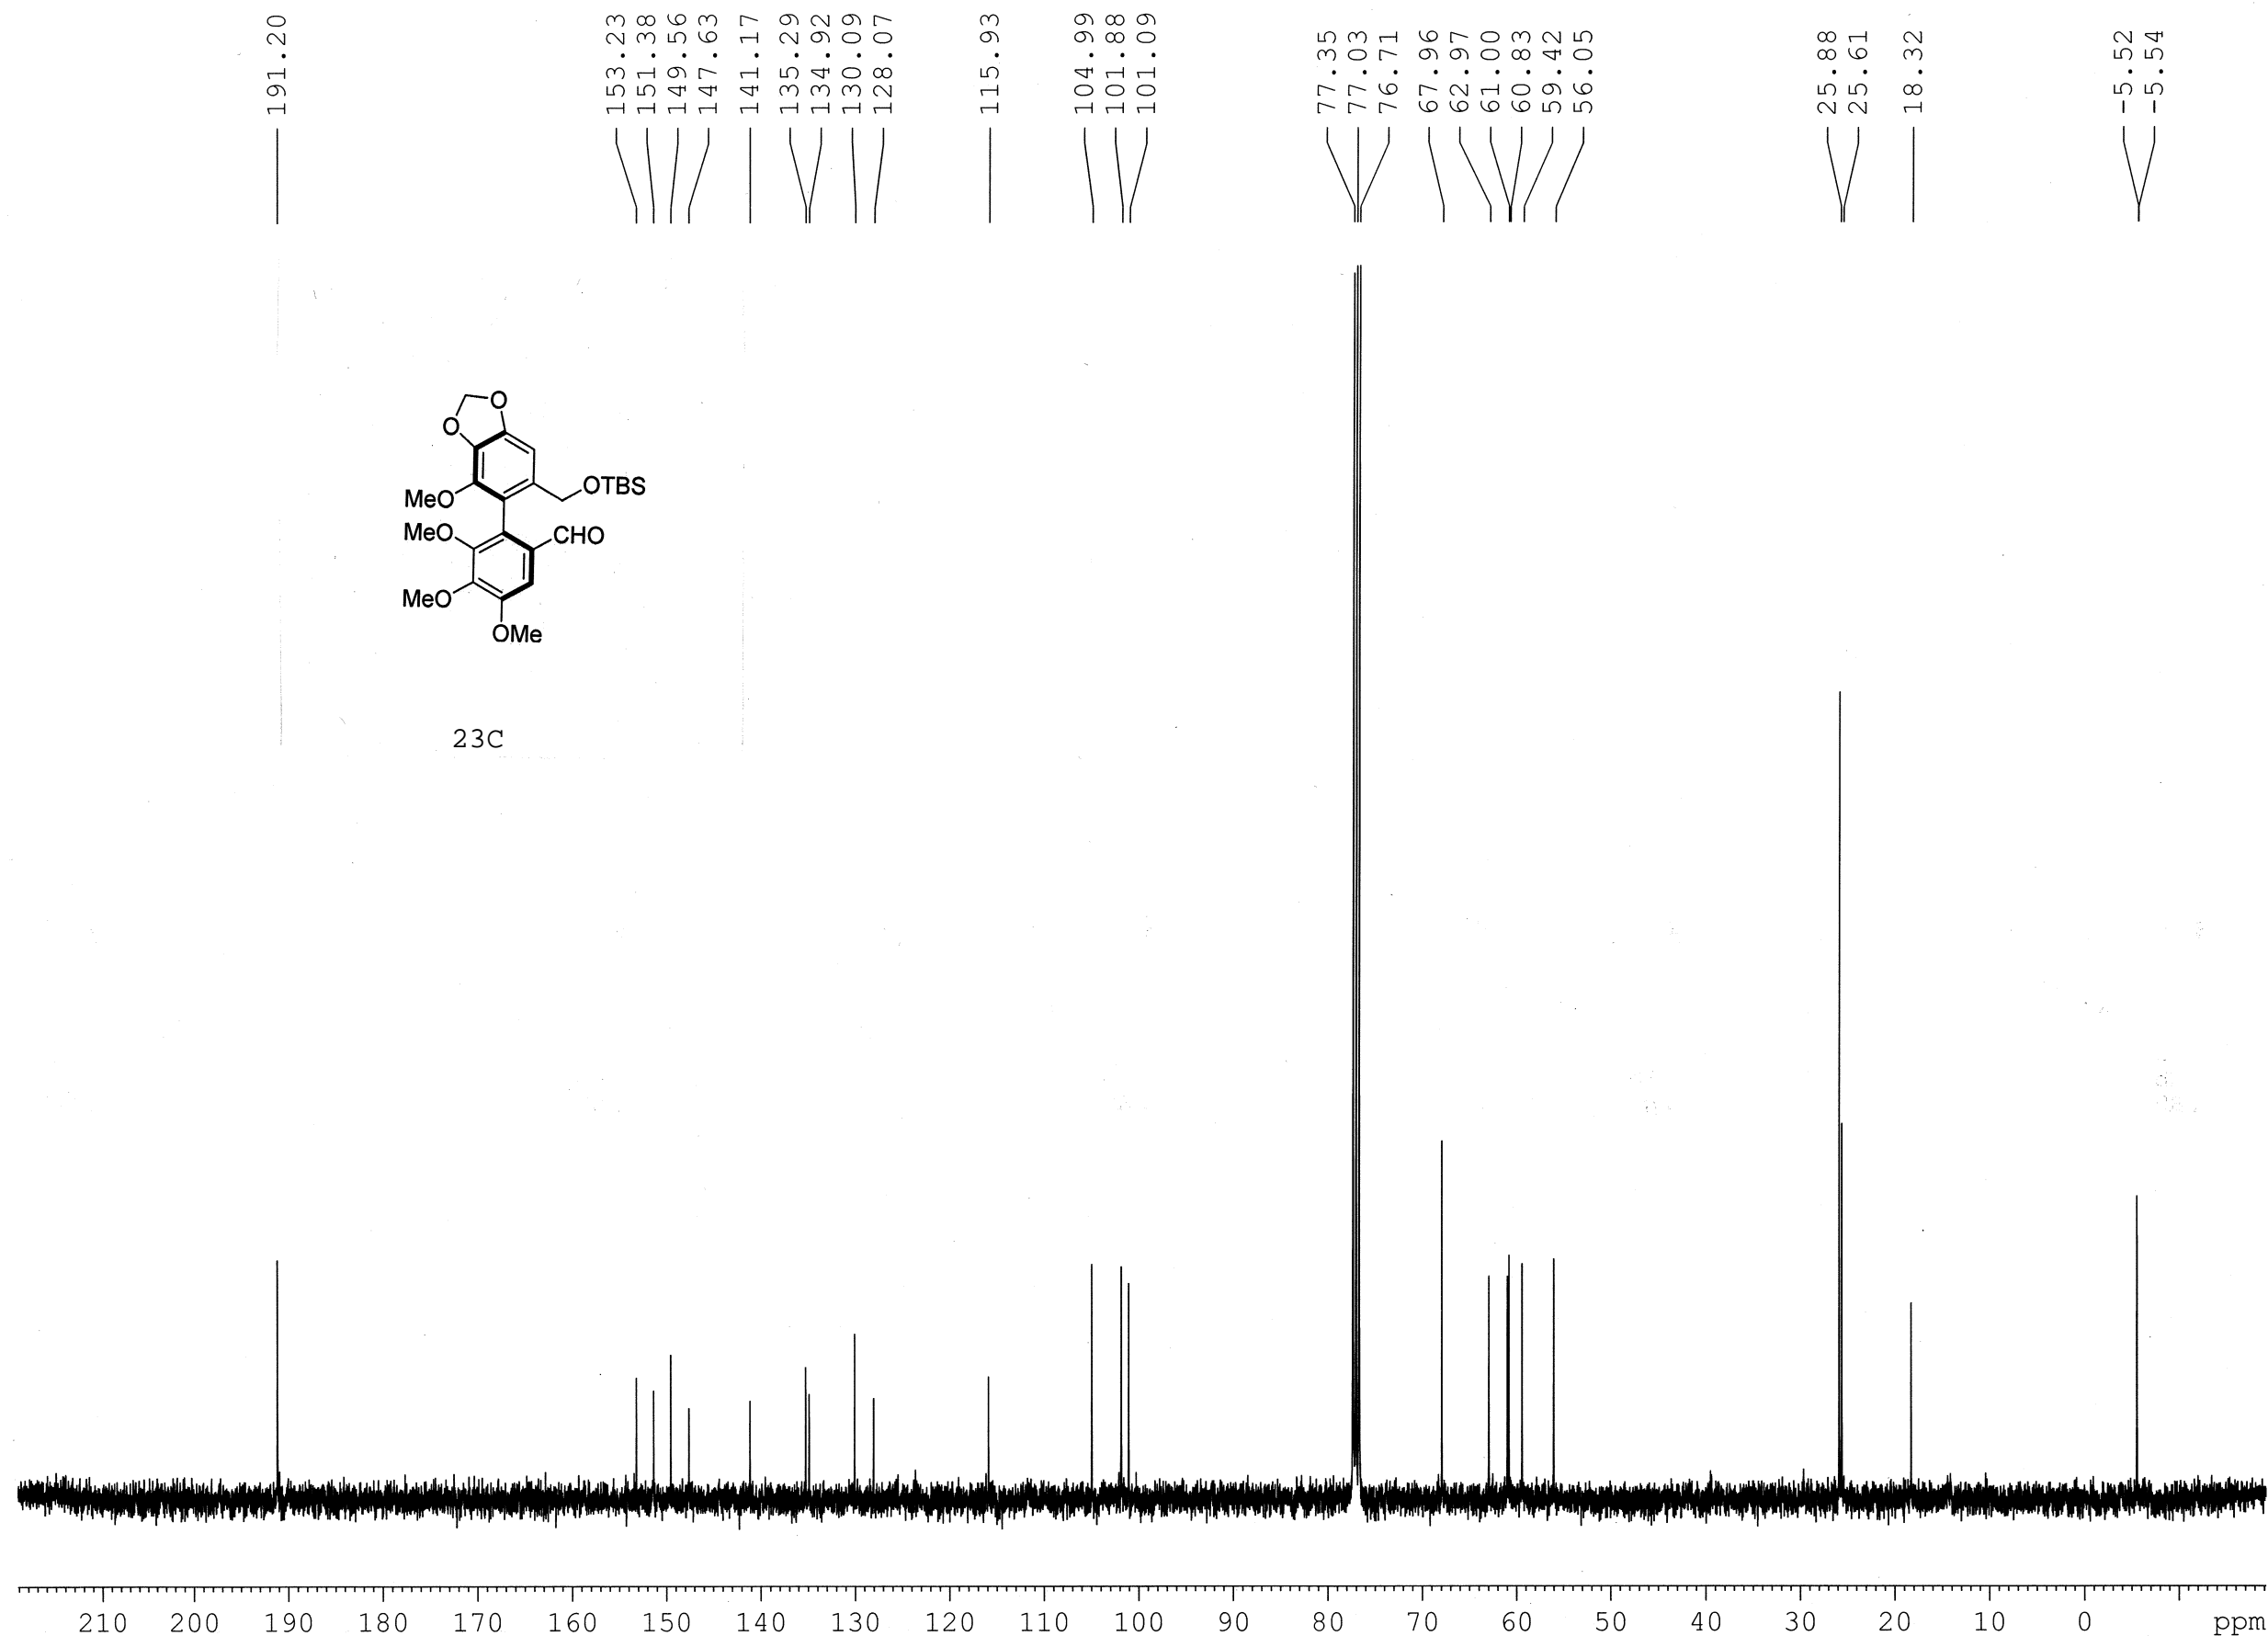





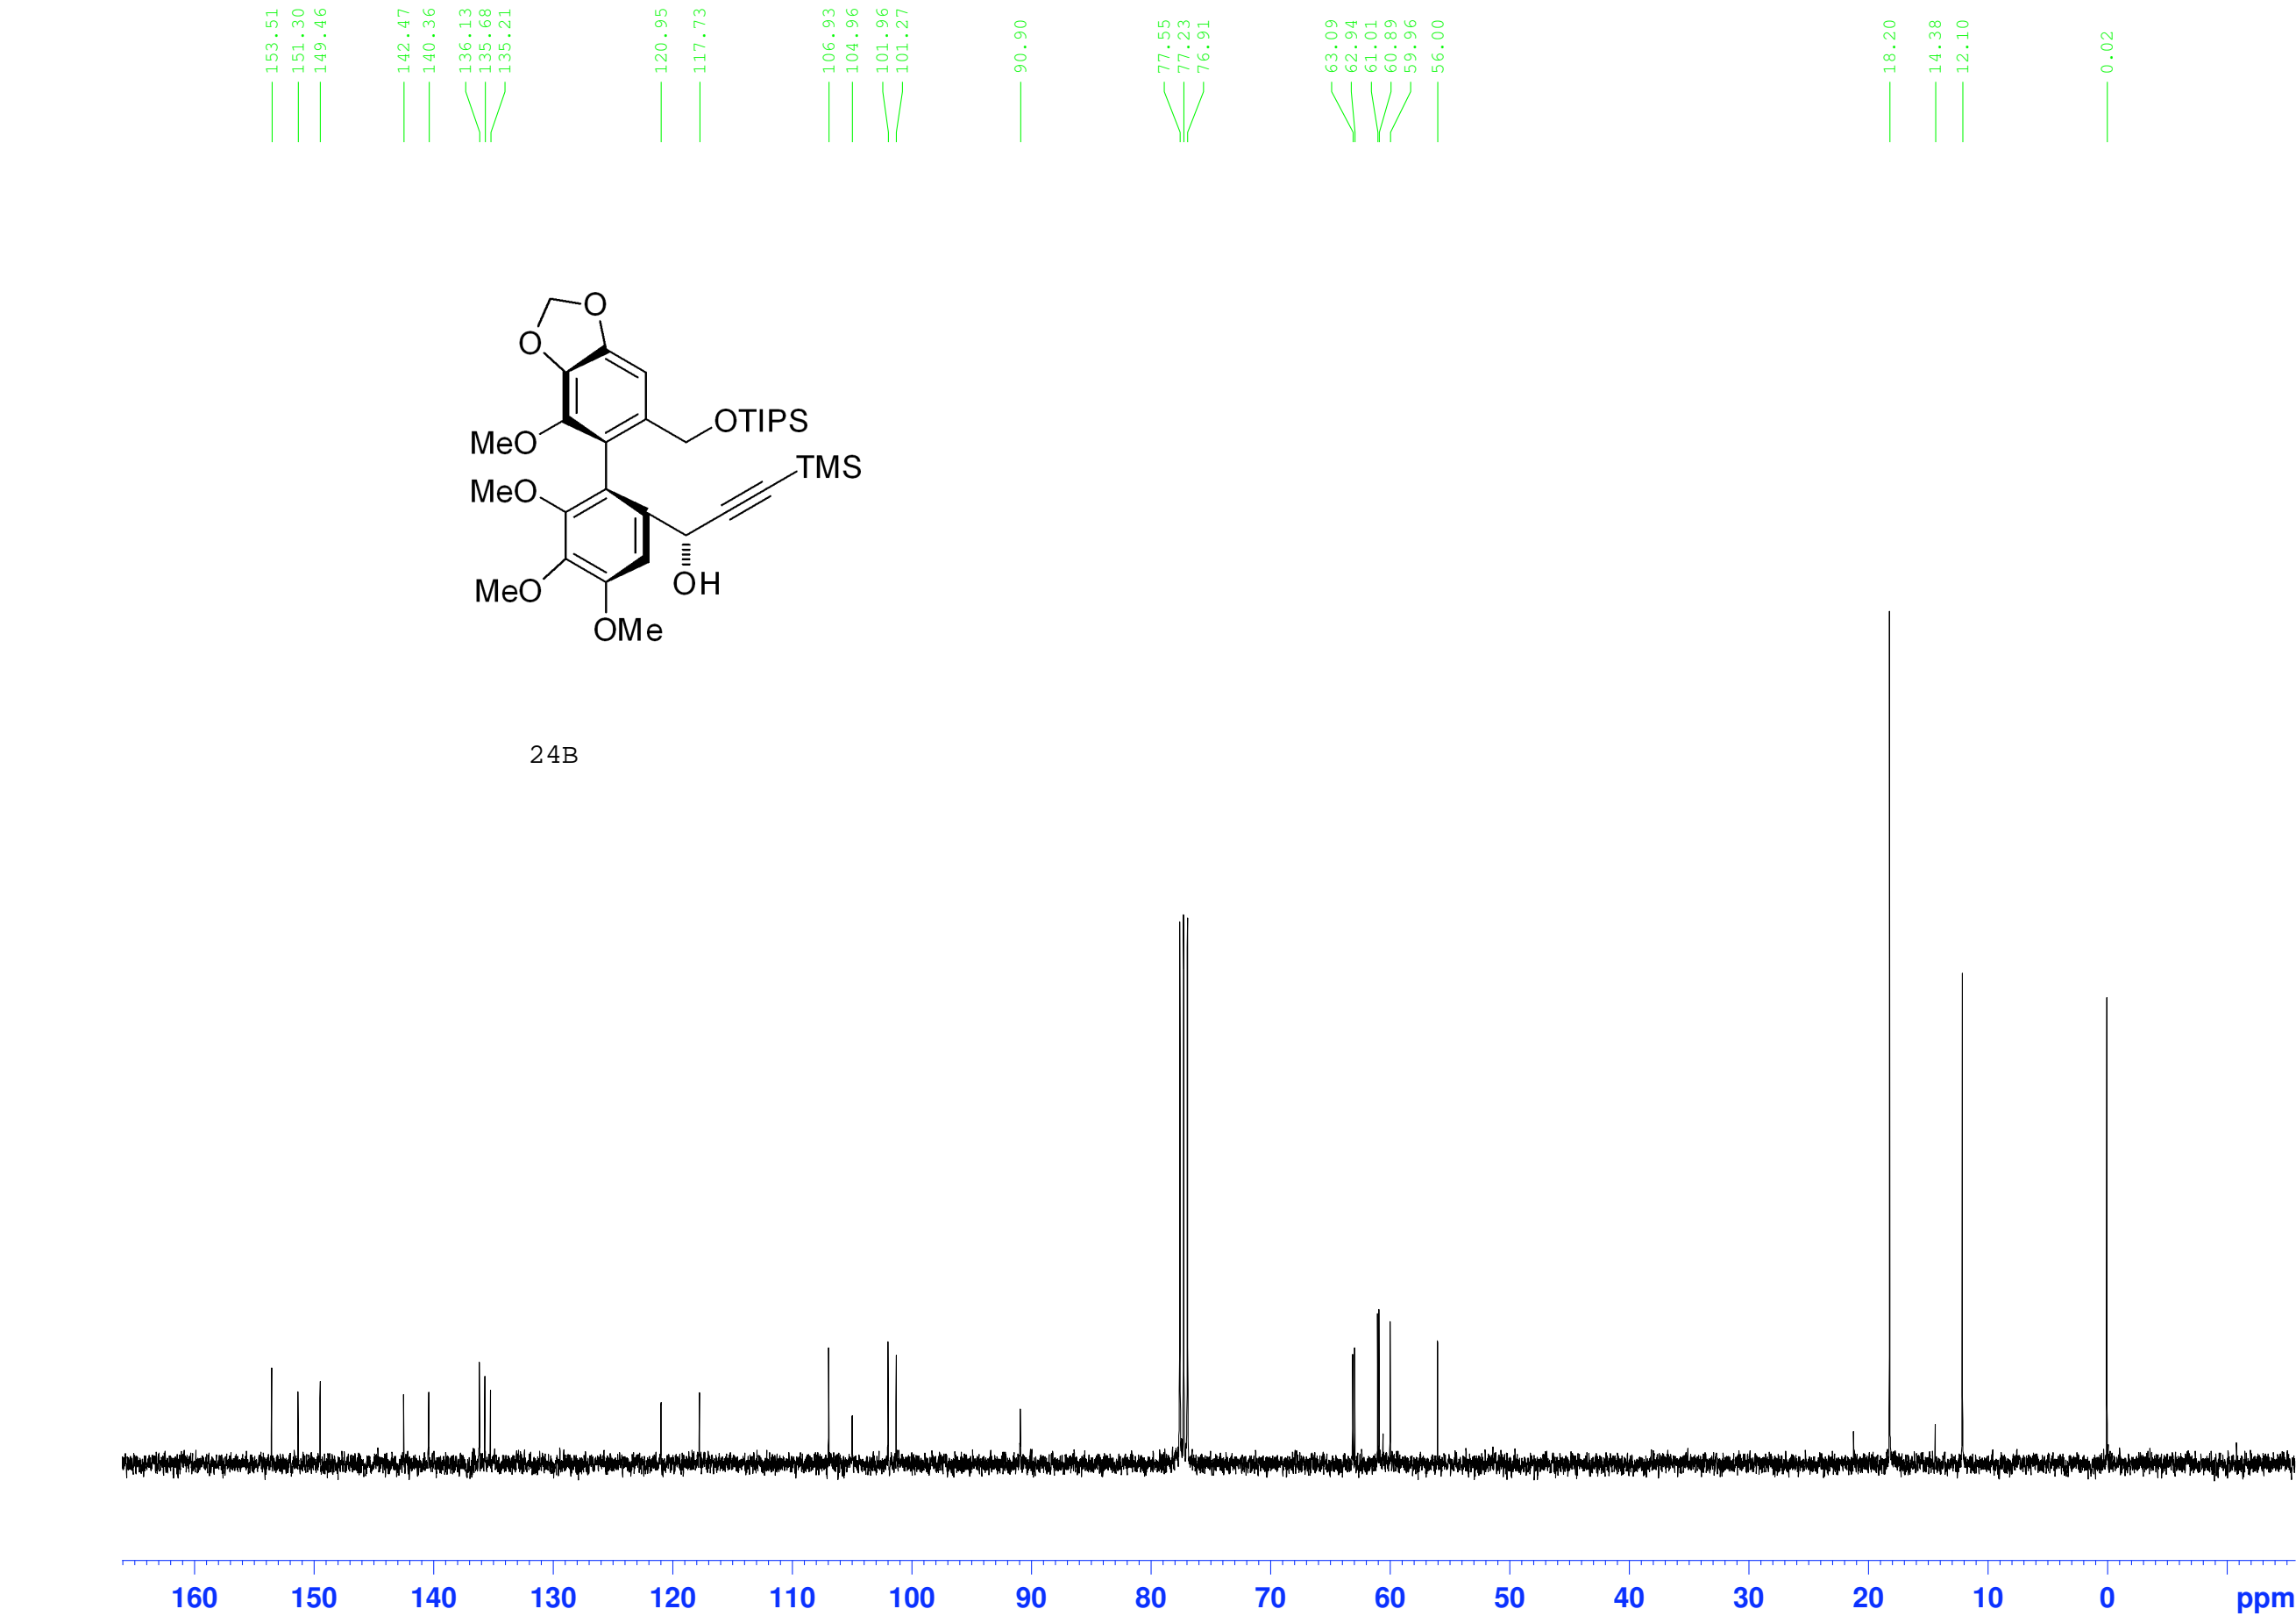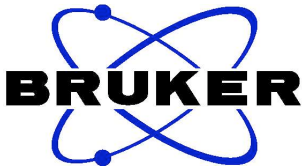

Current Data Parameters  
NAME Rs-6-179-MP-1  
EXPNO 3  
PROCNO 1

F2 - Acquisition Parameters  
Date\_ 20101117  
Time 9.45  
INSTRUM spect  
PROBHD 5 mm QNP 1H/13  
PULPROG zgpg30  
TD 65536  
SOLVENT CDCl3  
NS 131  
DS 4  
SWH 23980.814 Hz  
FIDRES 0.365918 Hz  
AQ 1.3664756 sec  
RG 4597.6  
DW 20.850 use  
DE 6.00 use  
TE 300.2 K  
D1 2.00000000 sec  
d11 0.03000000 sec  
DELTA 1.89999998 sec  
TD0 1

===== CHANNEL f1 =====  
NUC1 13C  
P1 10.50 use  
PL1 0.00 dB  
SFO1 100.6228298 MHz

===== CHANNEL f2 =====  
CPDPRG2 waltz16  
NUC2 1H  
PCPD2 80.00 use  
PL2 -6.00 dB  
PL12 14.56 dB  
PL13 16.50 dB  
SFO2 400.1316005 MHz

F2 - Processing parameters  
SI 32768  
SF 100.6127496 MHz  
WDW EM  
SSB 0  
LB 1.00 Hz  
GB 0  
PC 1.40

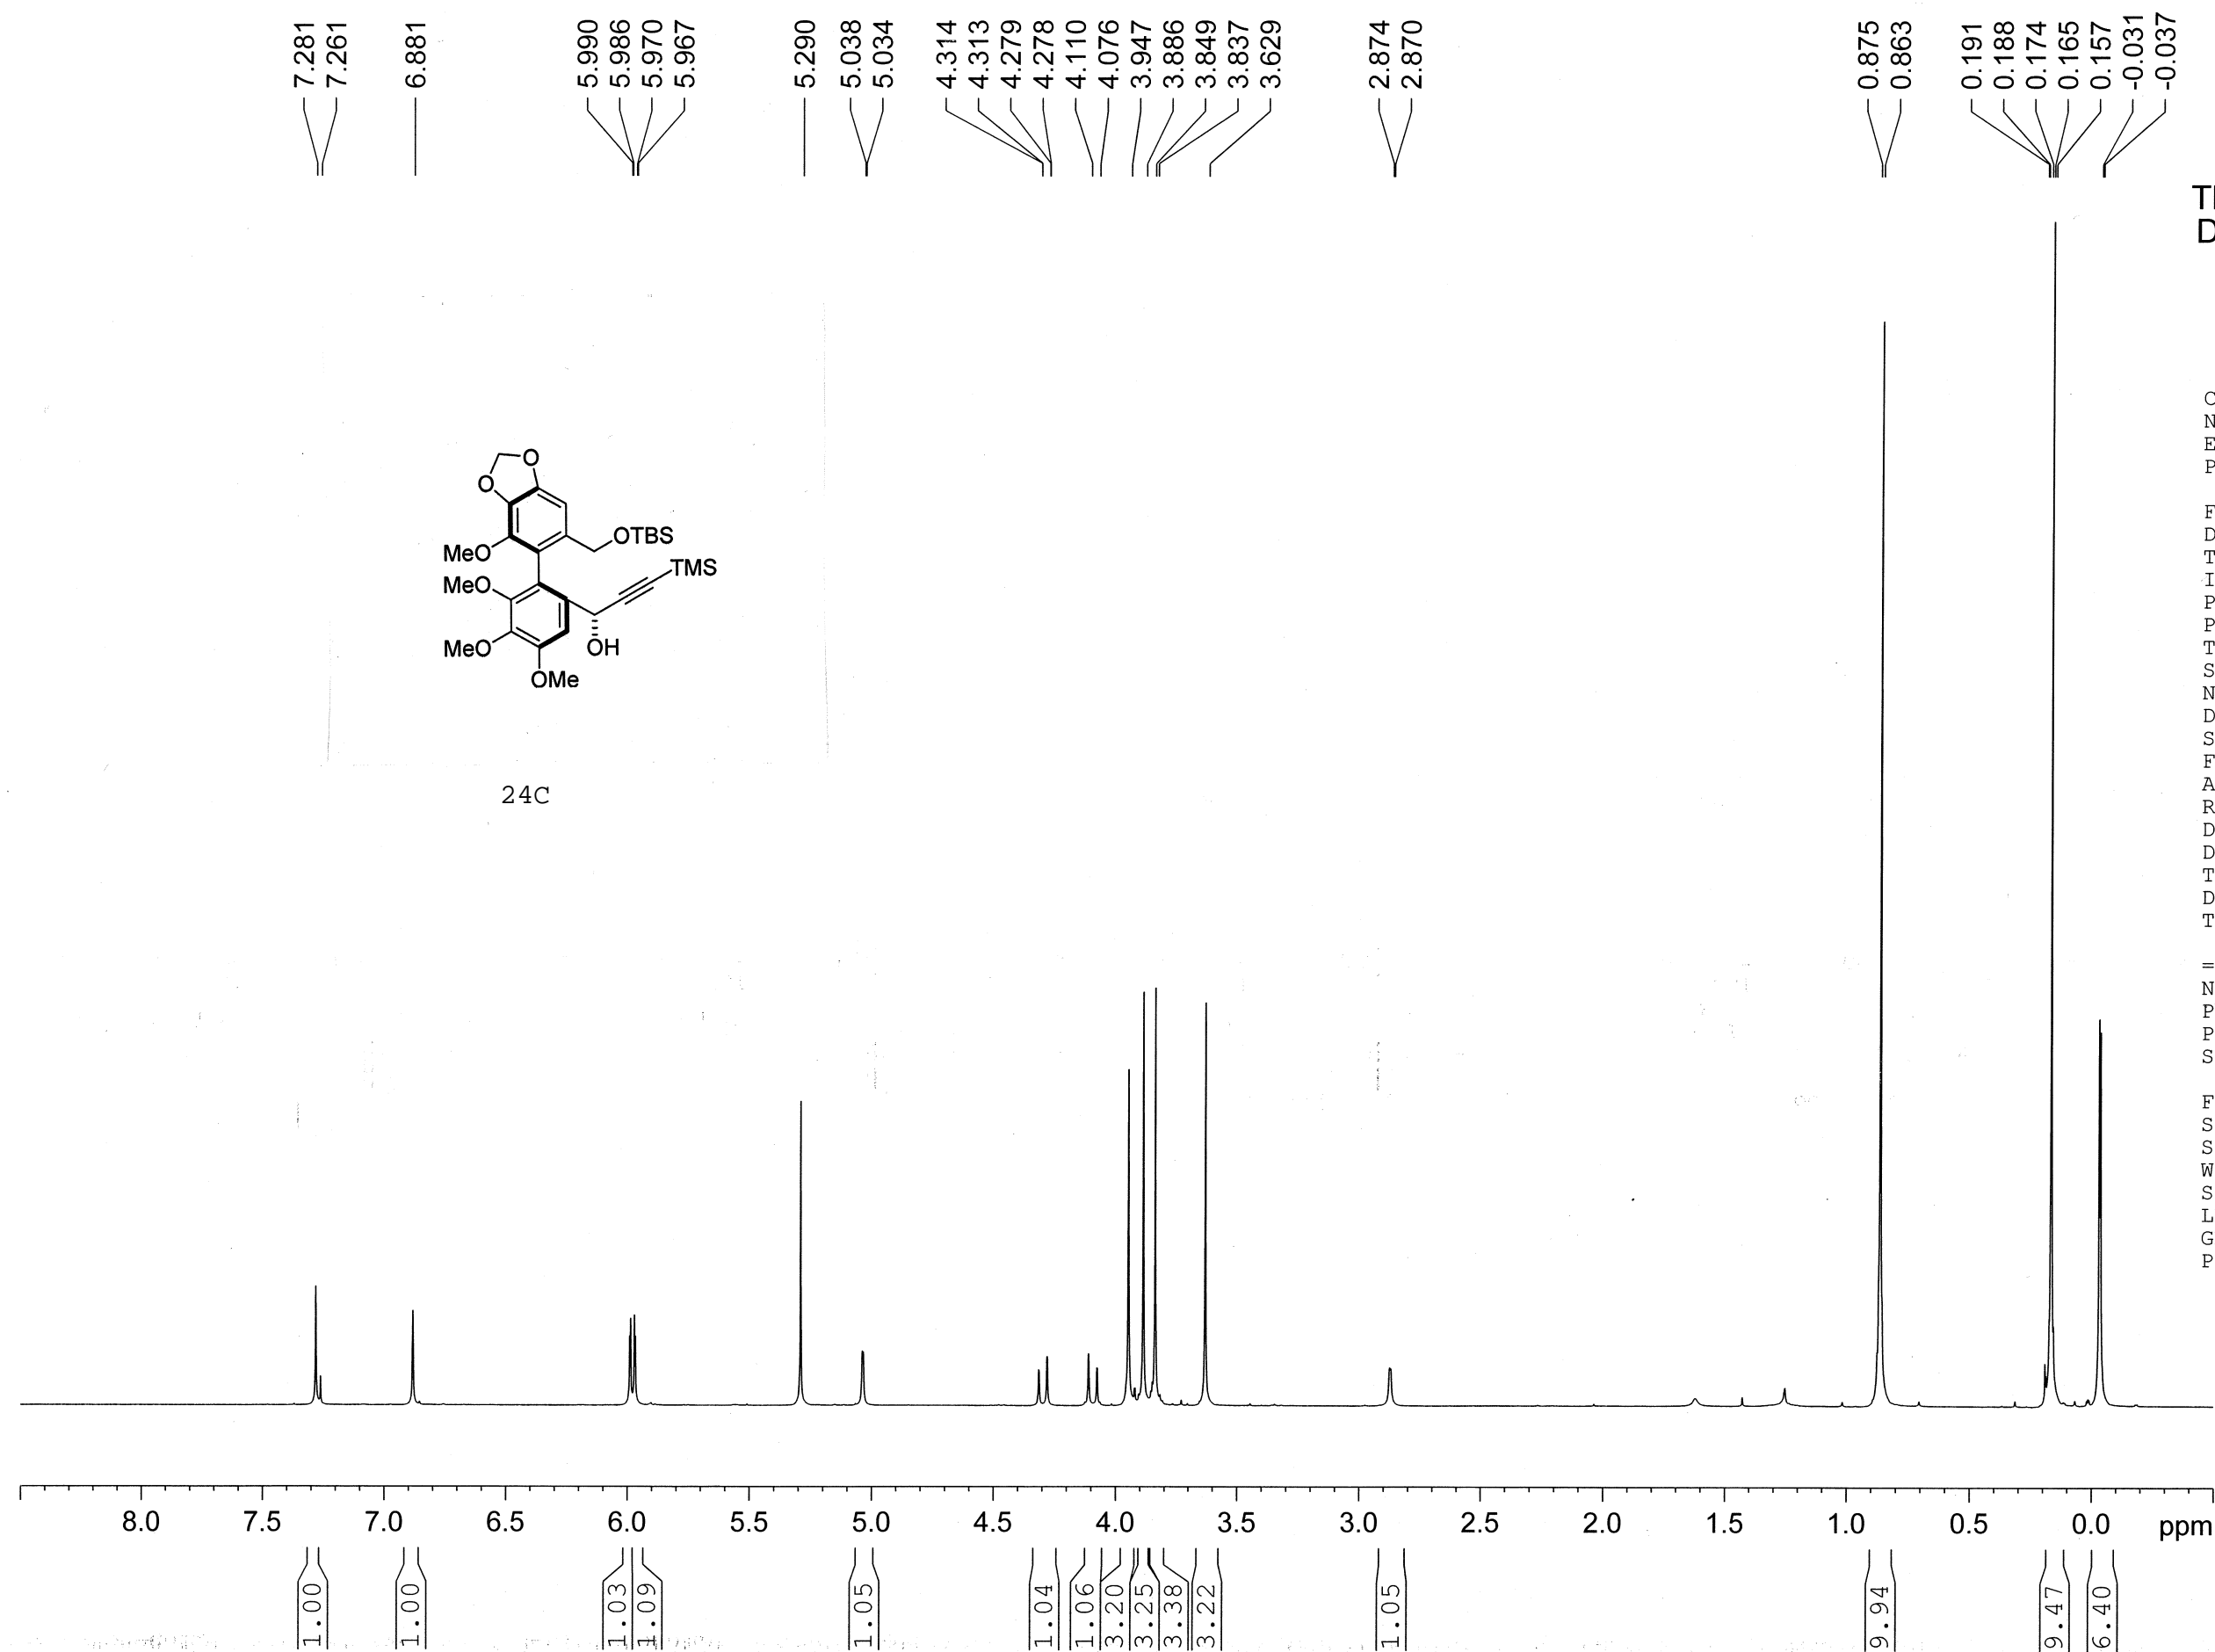

The Ohio State University  
Department of Chemistry  
NMR Facility

Current Data Parameters  
NAME Wgong-III-227-2  
EXPNO 522  
PROCNO 1

F2 - Acquisition Parameters  
Date\_ 20110519  
Time 15.21  
INSTRUM spect  
PROBHD 5 mm QNP 1H/13  
PULPROG zg30  
TD 65536  
SOLVENT CDCl3  
NS 16  
DS 2  
SWH 8278.146 Hz  
FIDRES 0.126314 Hz  
AQ 3.9584243 sec  
RG 71.8  
DW 60.400 usec  
DE 6.00 usec  
TE 300.2 K  
D1 1.00000000 sec  
TD0 1

===== CHANNEL f1 =====  
NUC1 1H  
P1 14.50 usec  
PL1 0.00 dB  
SFO1 400.1324710 MHz

F2 - Processing parameters  
SI 32768  
SF 400.1300090 MHz  
WDW EM  
SSB 0  
LB 0.30 Hz  
GB 0  
PC 1.00

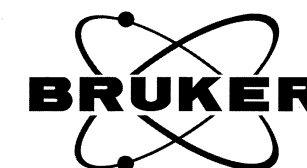

Current Data Parameters  
NAME Wgong-III-227-2 C13  
EXPNO 523  
PROCNO 1

F2 - Acquisition Parameters  
Date\_ 20110519  
Time\_ 15.35  
INSTRUM spect  
PROBHD 5 mm QNP 1H/13  
PULPROG zgpg30  
TD 65536  
SOLVENT CDCl3  
NS 181  
DS 4  
SWH 23980.814 Hz  
FIDRES 0.365918 Hz  
AQ 1.3664756 sec  
RG 1448.2  
DW 20.850 usec  
DE 6.00 usec  
TE 300.2 K  
D1 2.00000000 sec  
d11 0.03000000 sec  
DELTA 1.89999998 sec  
TD0 1

===== CHANNEL f1 =====  
NUC1 13C  
P1 10.50 usec  
PL1 0.00 dB  
SFO1 100.6228298 MHz

===== CHANNEL f2 =====  
CPDPRG2 waltz16  
NUC2 1H  
PCPD2 80.00 usec  
PL2 -6.00 dB  
PL12 14.56 dB  
PL13 16.50 dB  
SFO2 400.1316005 MHz

F2 - Processing parameters  
SI 32768  
SF 100.6127690 MHz  
WDW EM  
SSB 0  
LB 1.00 Hz  
GB 0  
PC 1.40

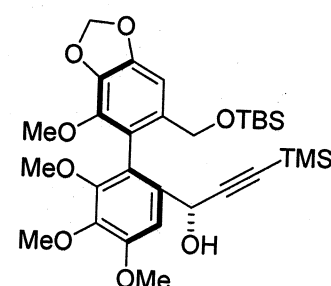

24C

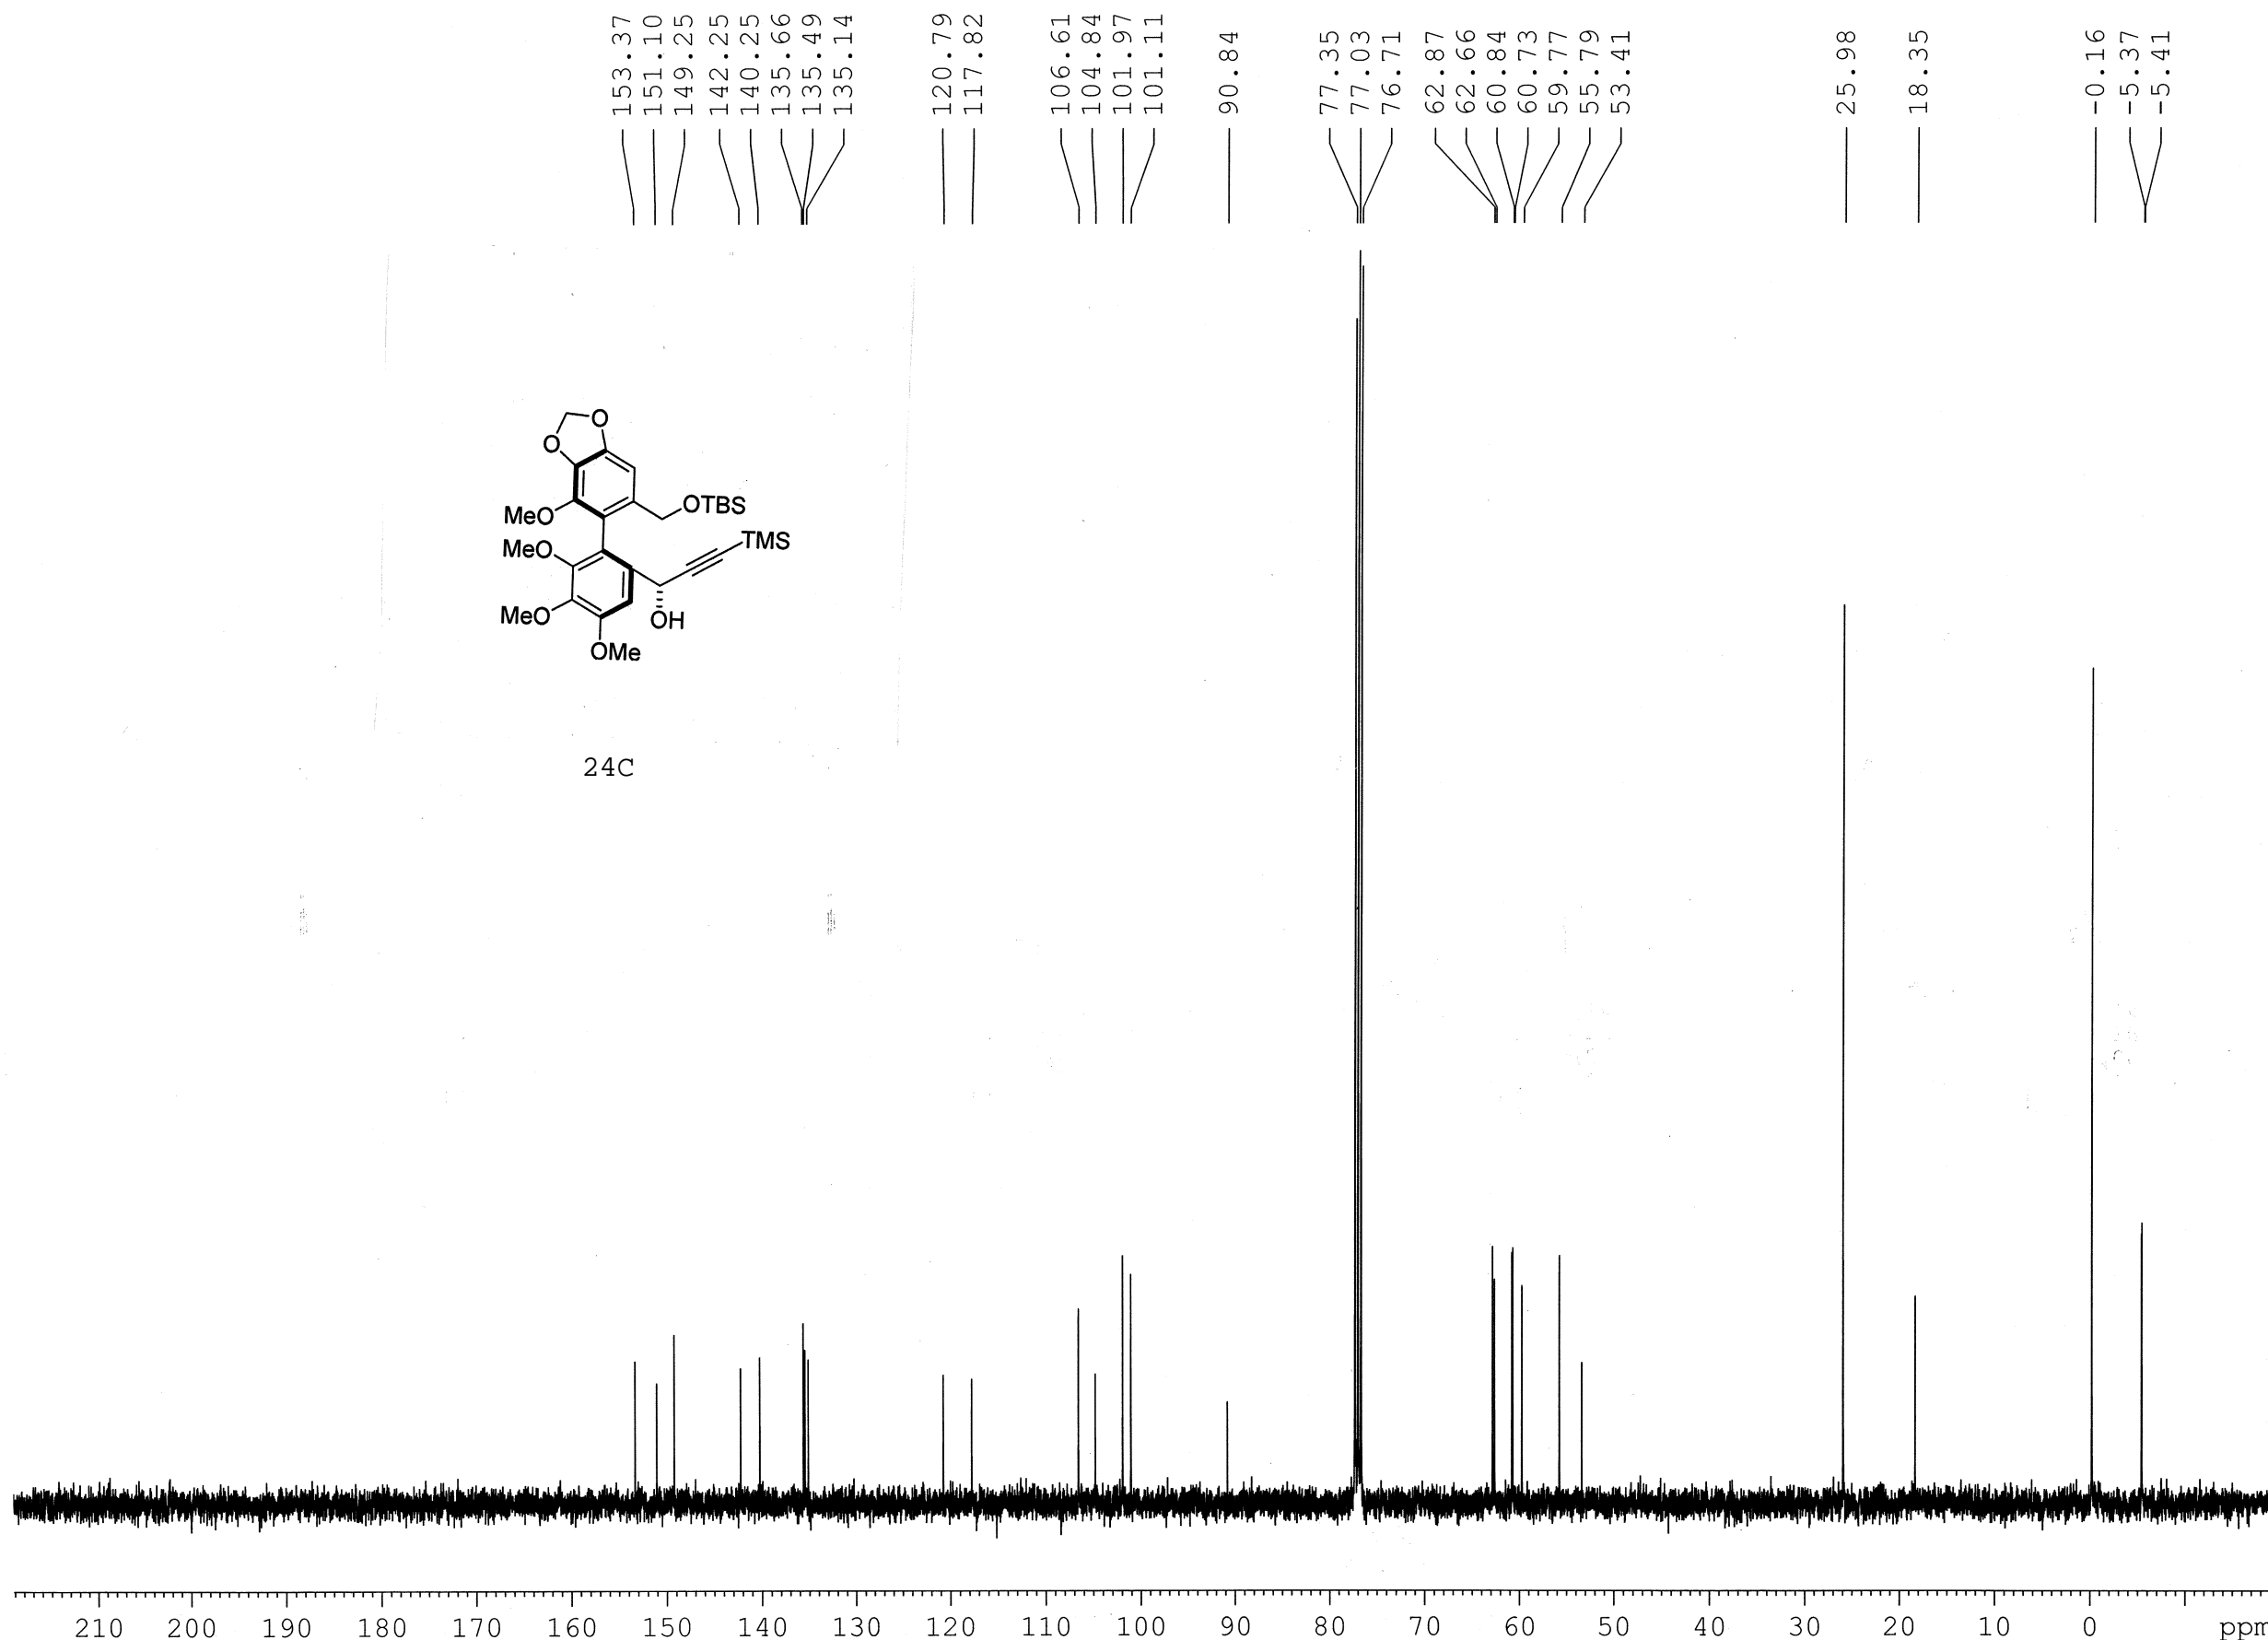

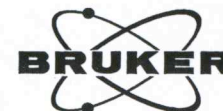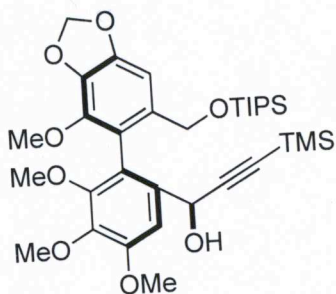

25B

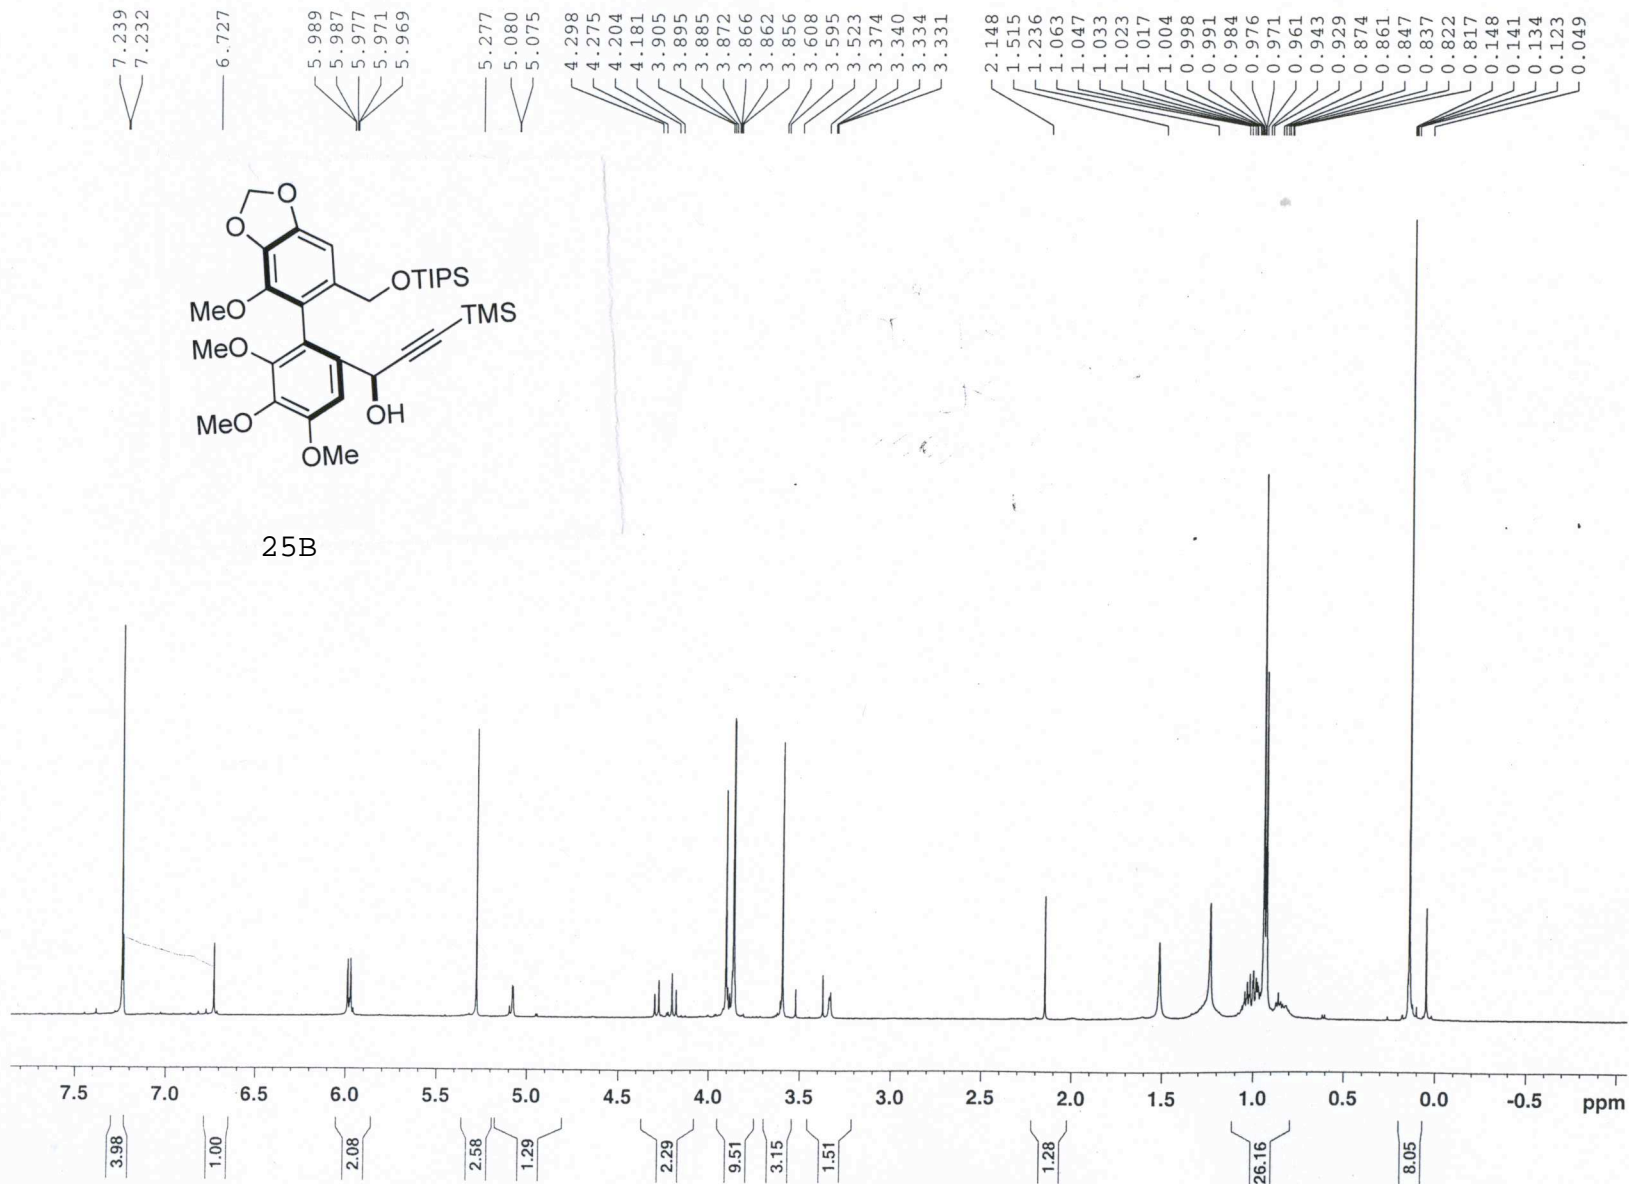

Current Data Parameters  
NAME Rs-6-LP-MP  
EXPNO 1  
PROCNO 1

F2 - Acquisition Parameters  
Date\_ 20101203  
Time 19.31  
INSTRUM spect  
PROBHD 5 mm Multinucl  
PULPROG zg30  
TD 65536  
SOLVENT CDCl3  
NS 16  
DS 2  
SWH 10330.578 Hz  
FIDRES 0.157632 Hz  
AQ 3.1719923 sec  
RG 812.7  
DW 48.400 usec  
DE 6.00 usec  
TE 300.2 K  
D1 1.00000000 sec  
MCREST 0.00000000 sec  
MCWRK 0.01500000 sec

===== CHANNEL f1 =====  
NUC1 1H  
P1 17.33 usec  
PL1 -1.00 dB  
SFO1 500.0230878 MHz

F2 - Processing parameters  
SI 32768  
SF 500.0200219 MHz  
WDW EM  
SSB 0  
LB 0.30 Hz  
GB 0  
PC 1.40

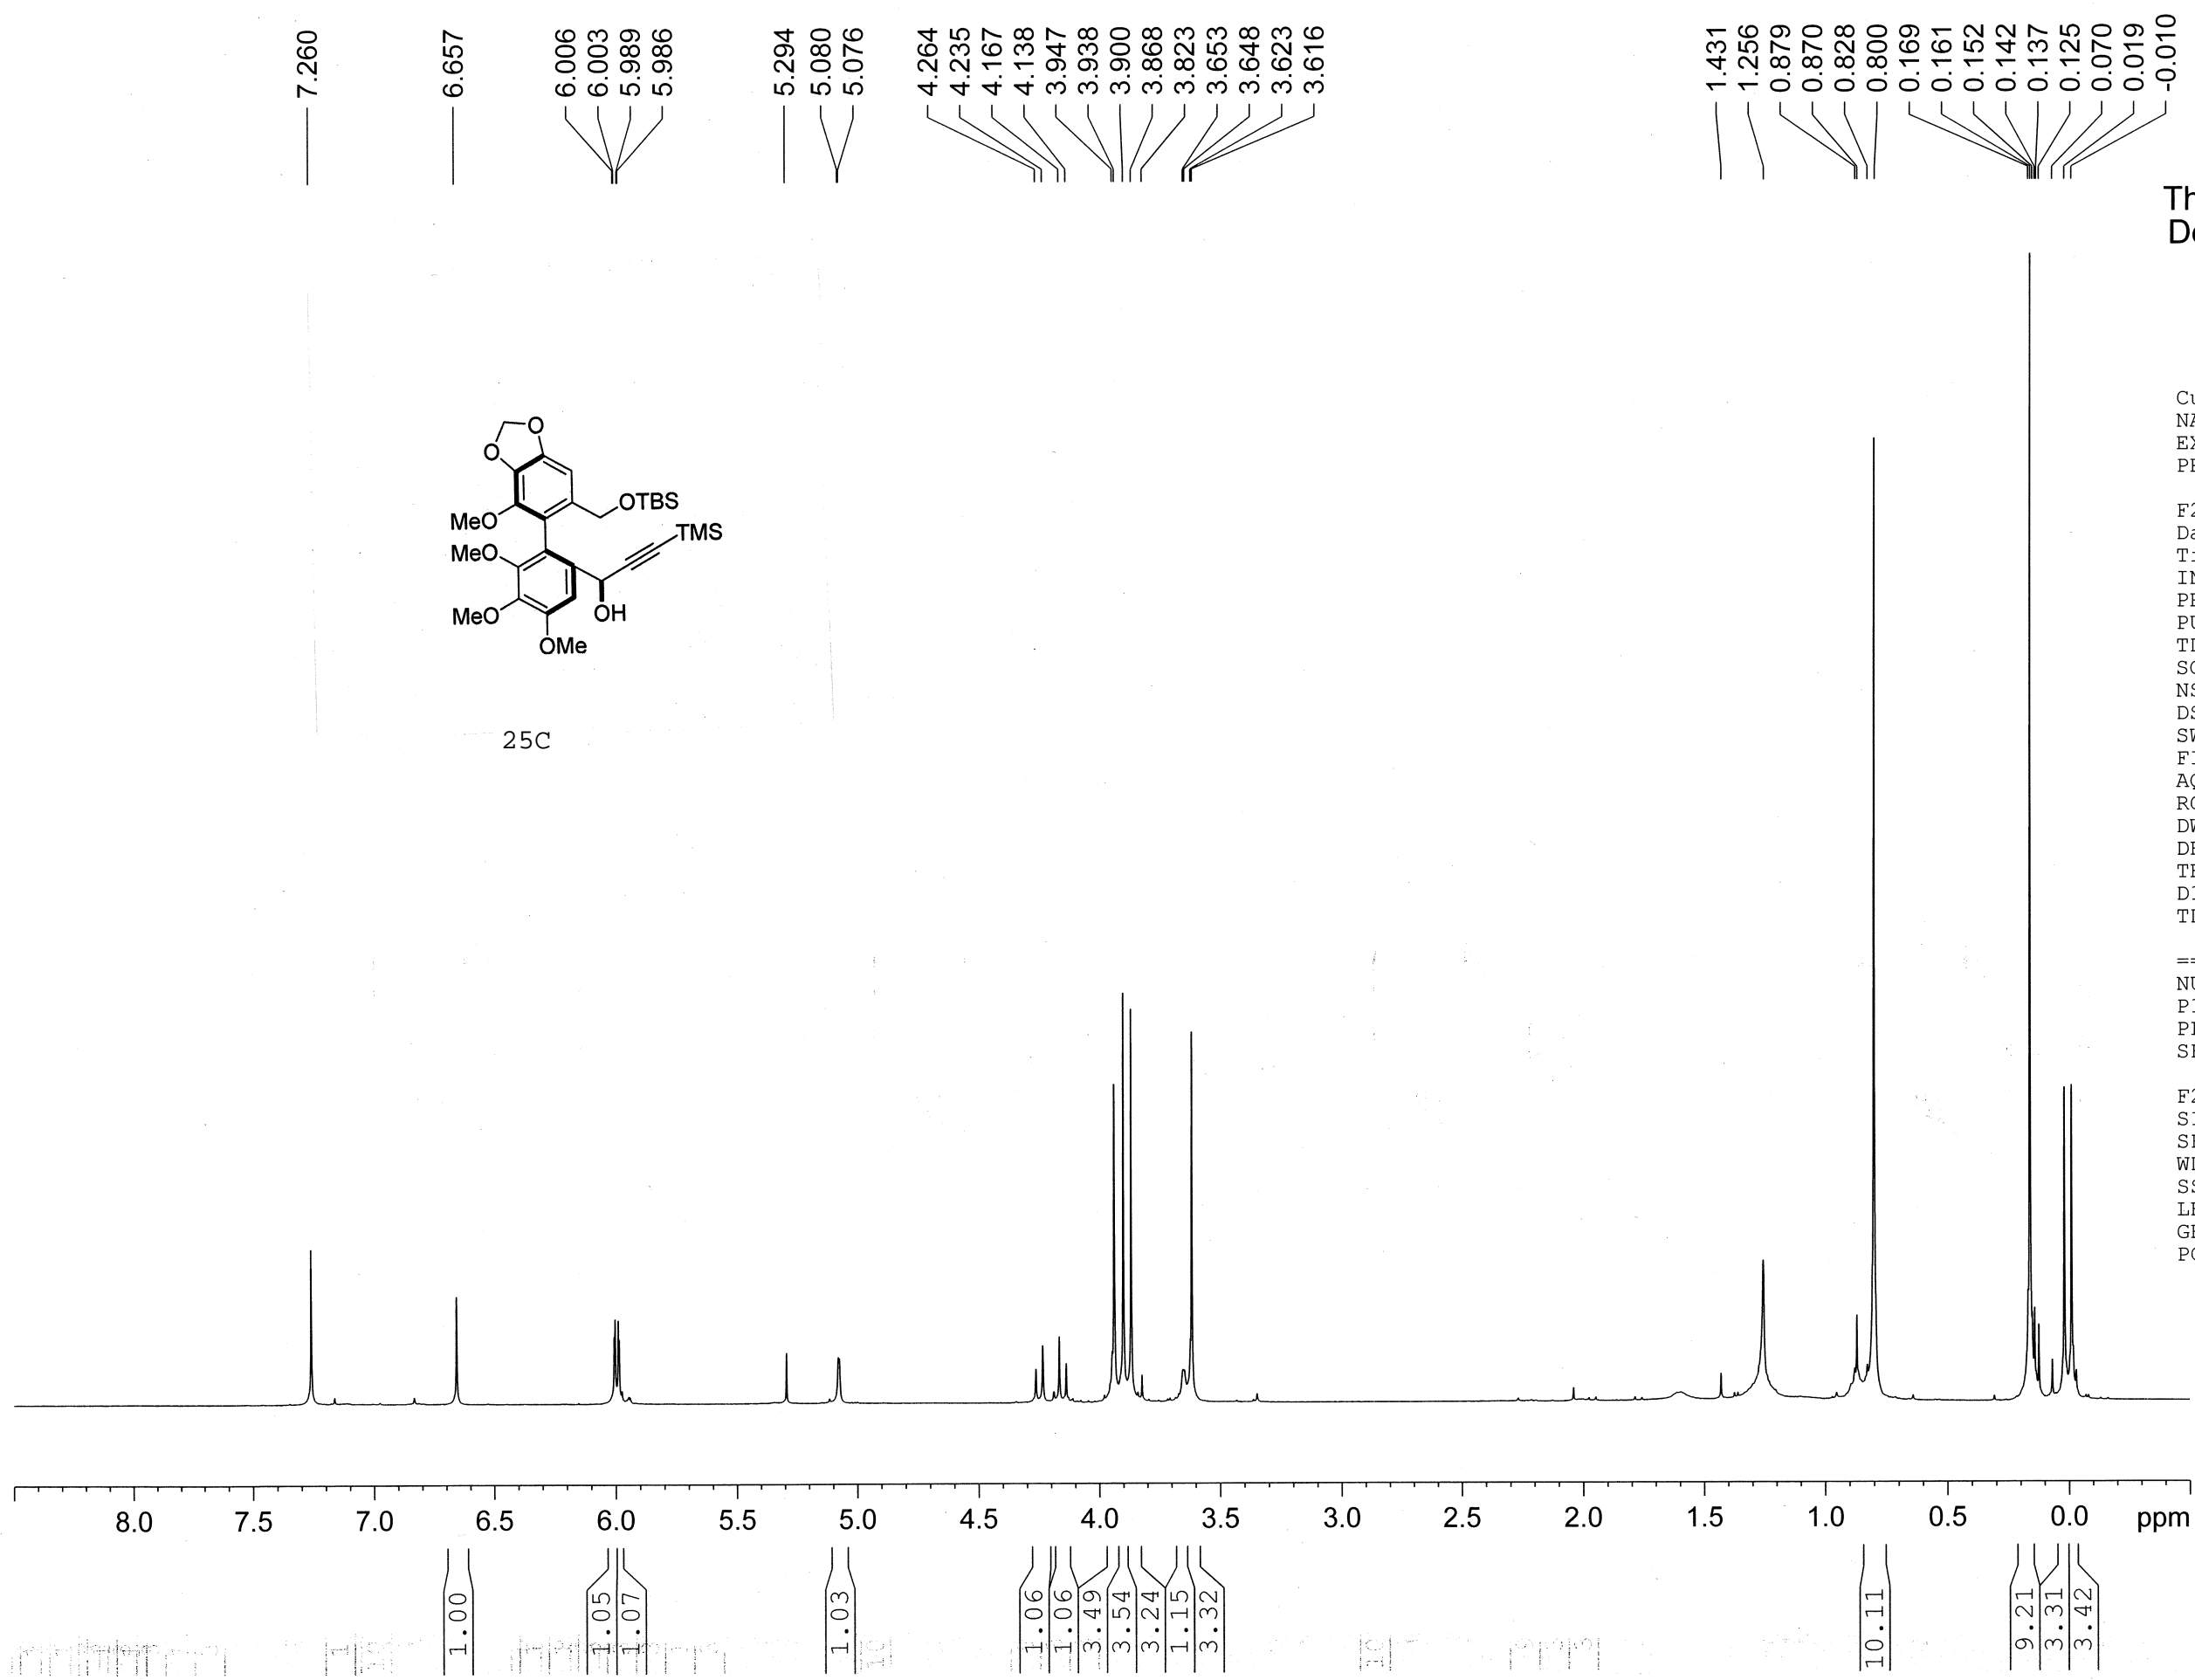

The Ohio State University  
Department of Chemistry  
NMR Facility

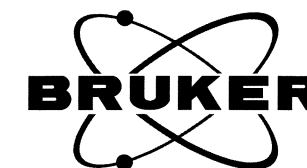

Current Data Parameters  
NAME Wgong-III-227-1 p C13  
EXPNO 533  
PROCNO 1

F2 - Acquisition Parameters  
Date\_ 20110525  
Time\_ 10.24  
INSTRUM spect  
PROBHD 5 mm QNP 1H/13  
PULPROG zgpg30  
TD 65536  
SOLVENT CDC13  
NS 1024  
DS 4  
SWH 23980.814 Hz  
FIDRES 0.365918 Hz  
AQ 1.3664756 sec  
RG 812.7  
DW 20.850 usec  
DE 6.00 usec  
TE 300.2 K  
D1 2.00000000 sec  
d11 0.03000000 sec  
DELTA 1.89999998 sec  
TD0 1

===== CHANNEL f1 =====  
NUC1 13C  
P1 10.50 usec  
PL1 0.00 dB  
SFO1 100.6228298 MHz

===== CHANNEL f2 =====  
CPDPRG2 waltz16  
NUC2 1H  
PCPD2 80.00 usec  
PL2 -6.00 dB  
PL12 14.56 dB  
PL13 16.50 dB  
SFO2 400.1316005 MHz

F2 - Processing parameters  
SI 32768  
SF 100.6127690 MHz  
WDW EM  
SSB 0  
LB 1.00 Hz  
GB 0  
PC 1.40

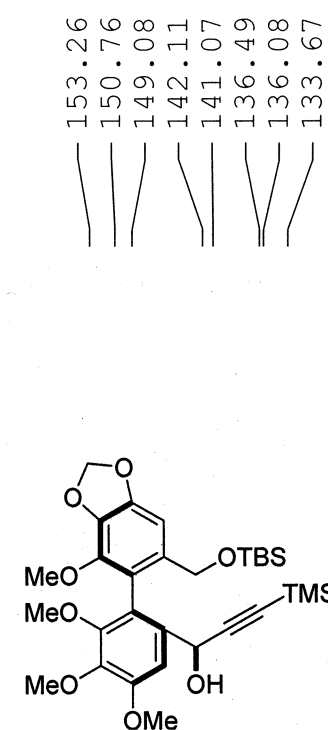

25C

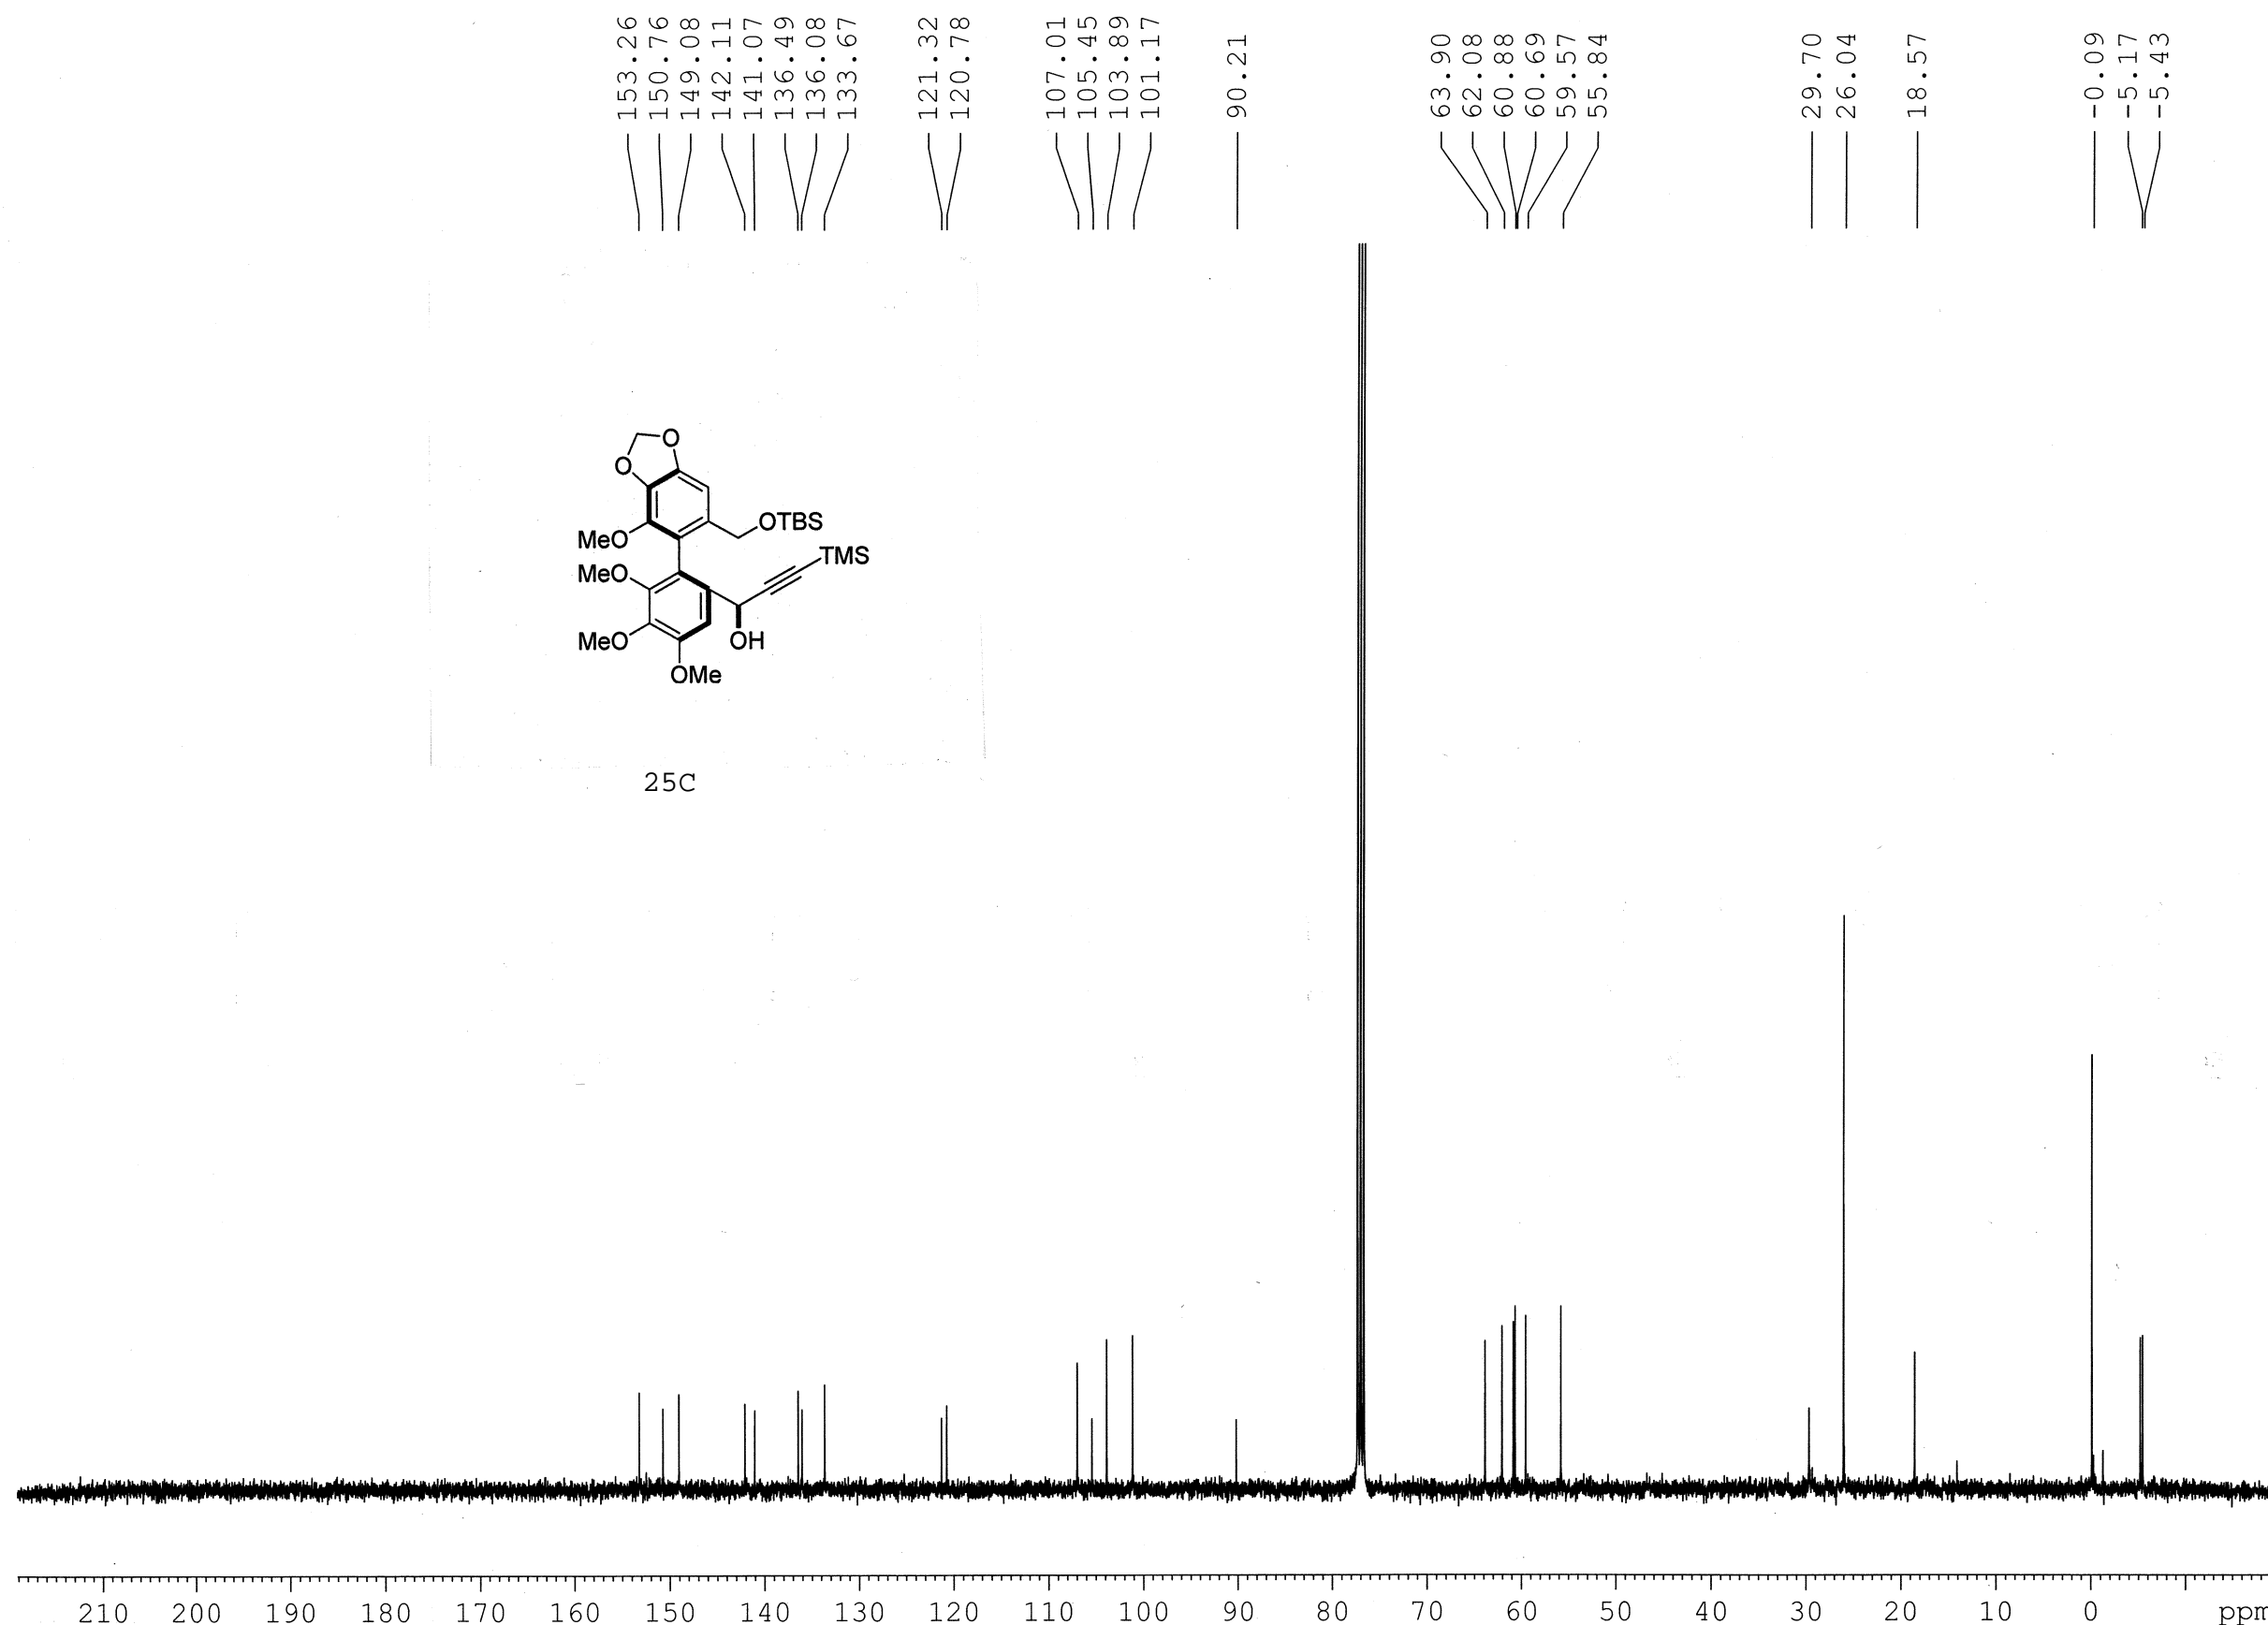



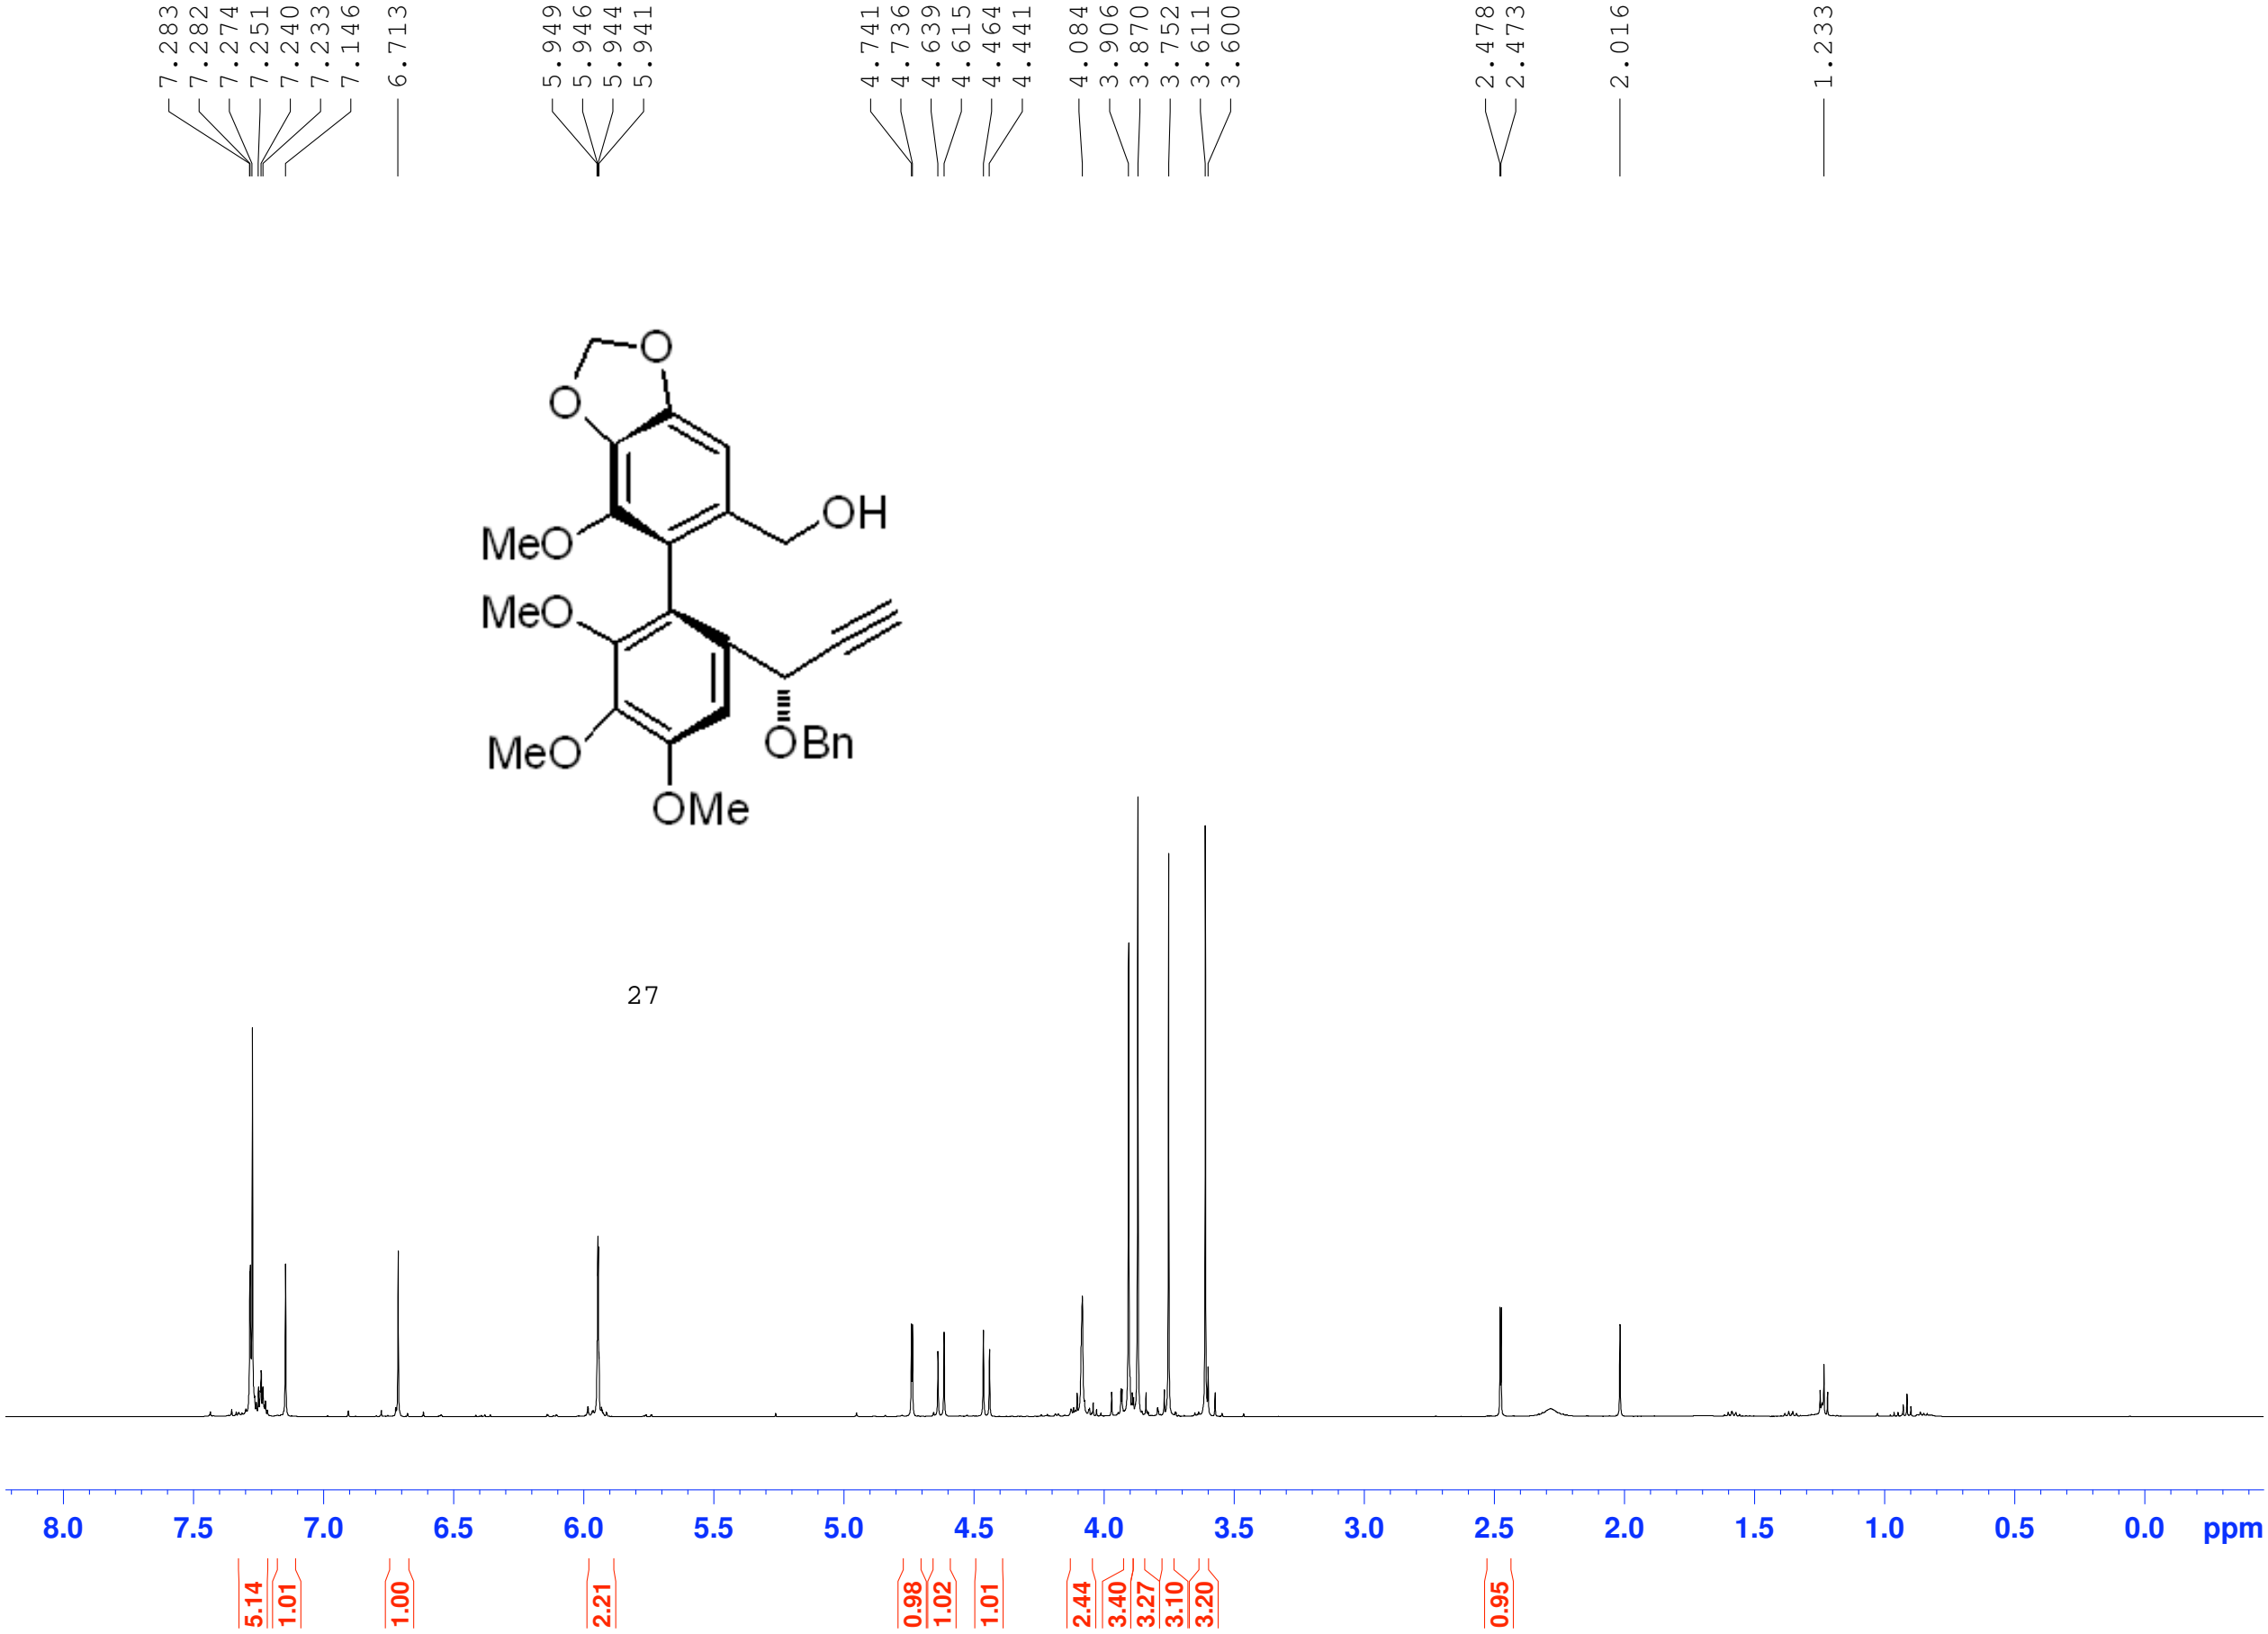

Current Data Parameters  
NAME Rs-6-163-MP  
EXPNO 1  
PROCNO 1

F2 - Acquisition Parameters  
Date\_ 20101104  
Time 17.58  
INSTRUM spect  
PROBHD 5 mm Multinucl  
PULPROG zg30  
TD 65536  
SOLVENT CDCl3  
NS 16  
DS 2  
SWH 10330.578 Hz  
FIDRES 0.157632 Hz  
AQ 3.1719923 sec  
RG 80.6  
DW 48.400 usec  
DE 6.00 usec  
TE 300.2 K  
D1 1.00000000 sec  
MCREST 0.00000000 sec  
MCWRK 0.01500000 sec

===== CHANNEL f1 =====  
NUC1 1H  
P1 17.33 usec  
PL1 -1.00 dB  
SFO1 500.0230878 MHz

F2 - Processing parameters  
SI 32768  
SF 500.0200213 MHz  
WDW EM  
SSB 0  
LB 0.30 Hz  
GB 0  
PC 1.00

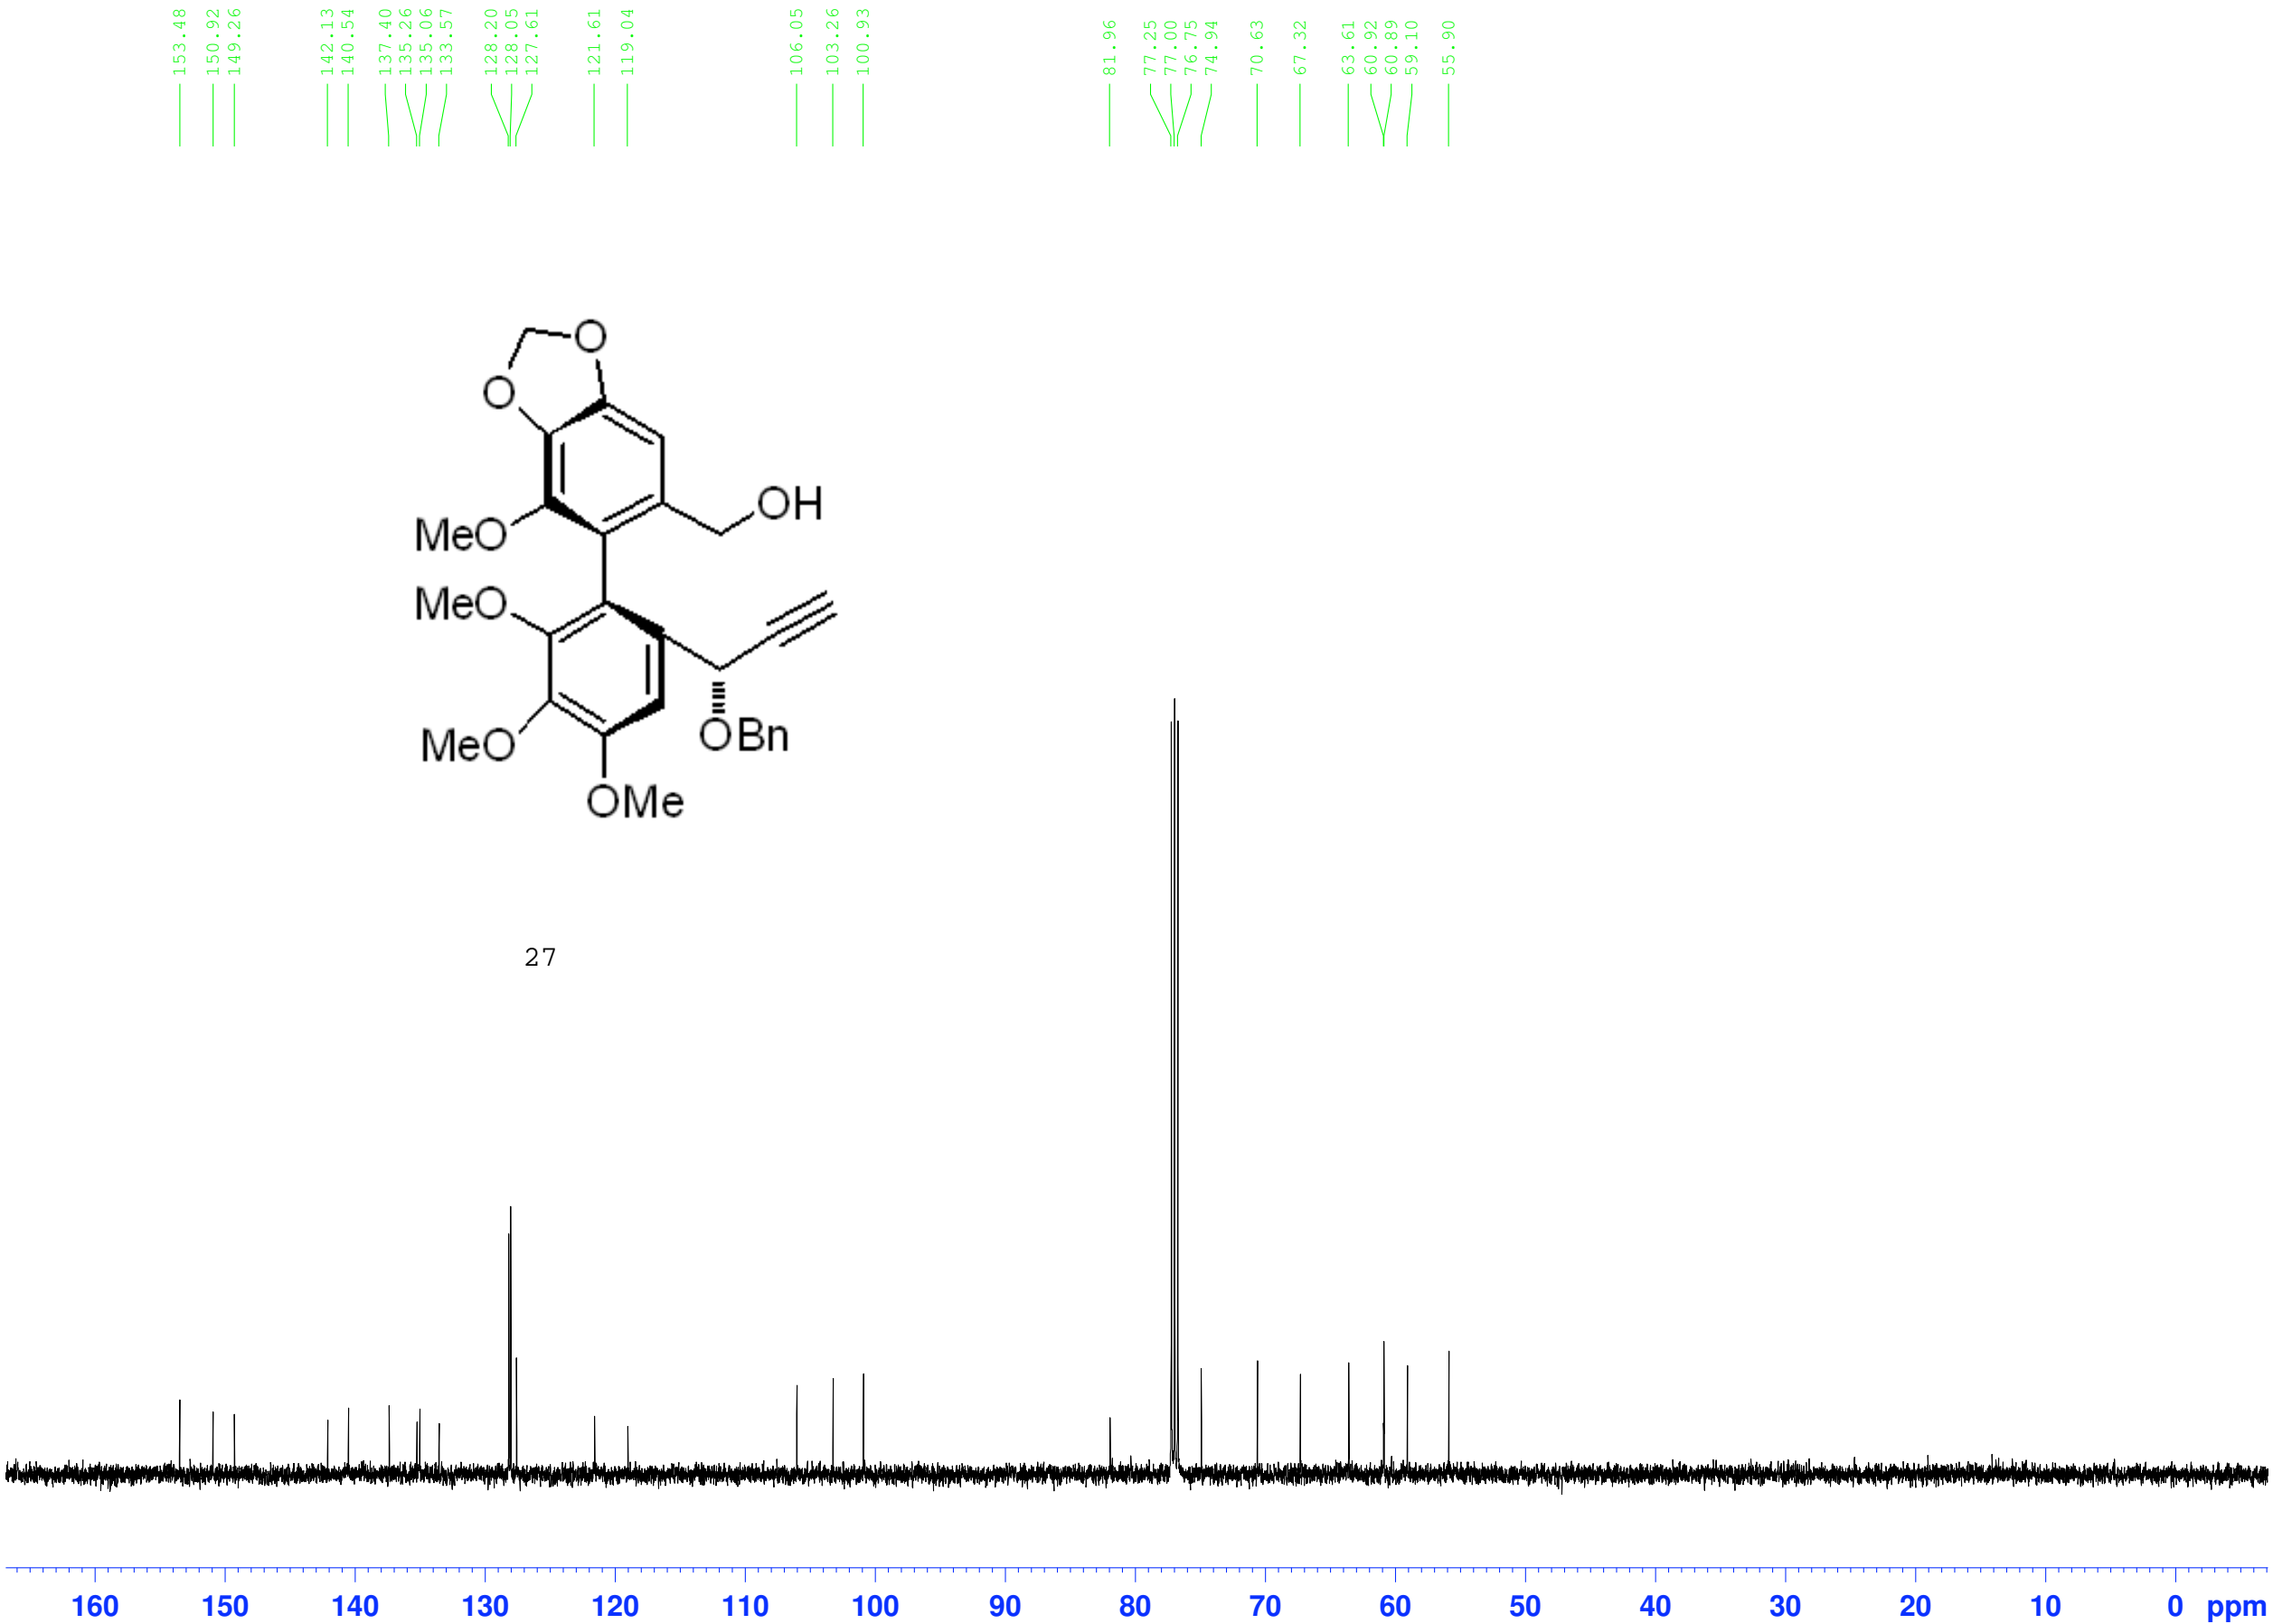

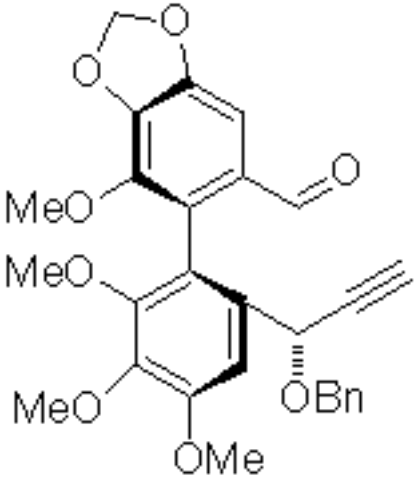

28

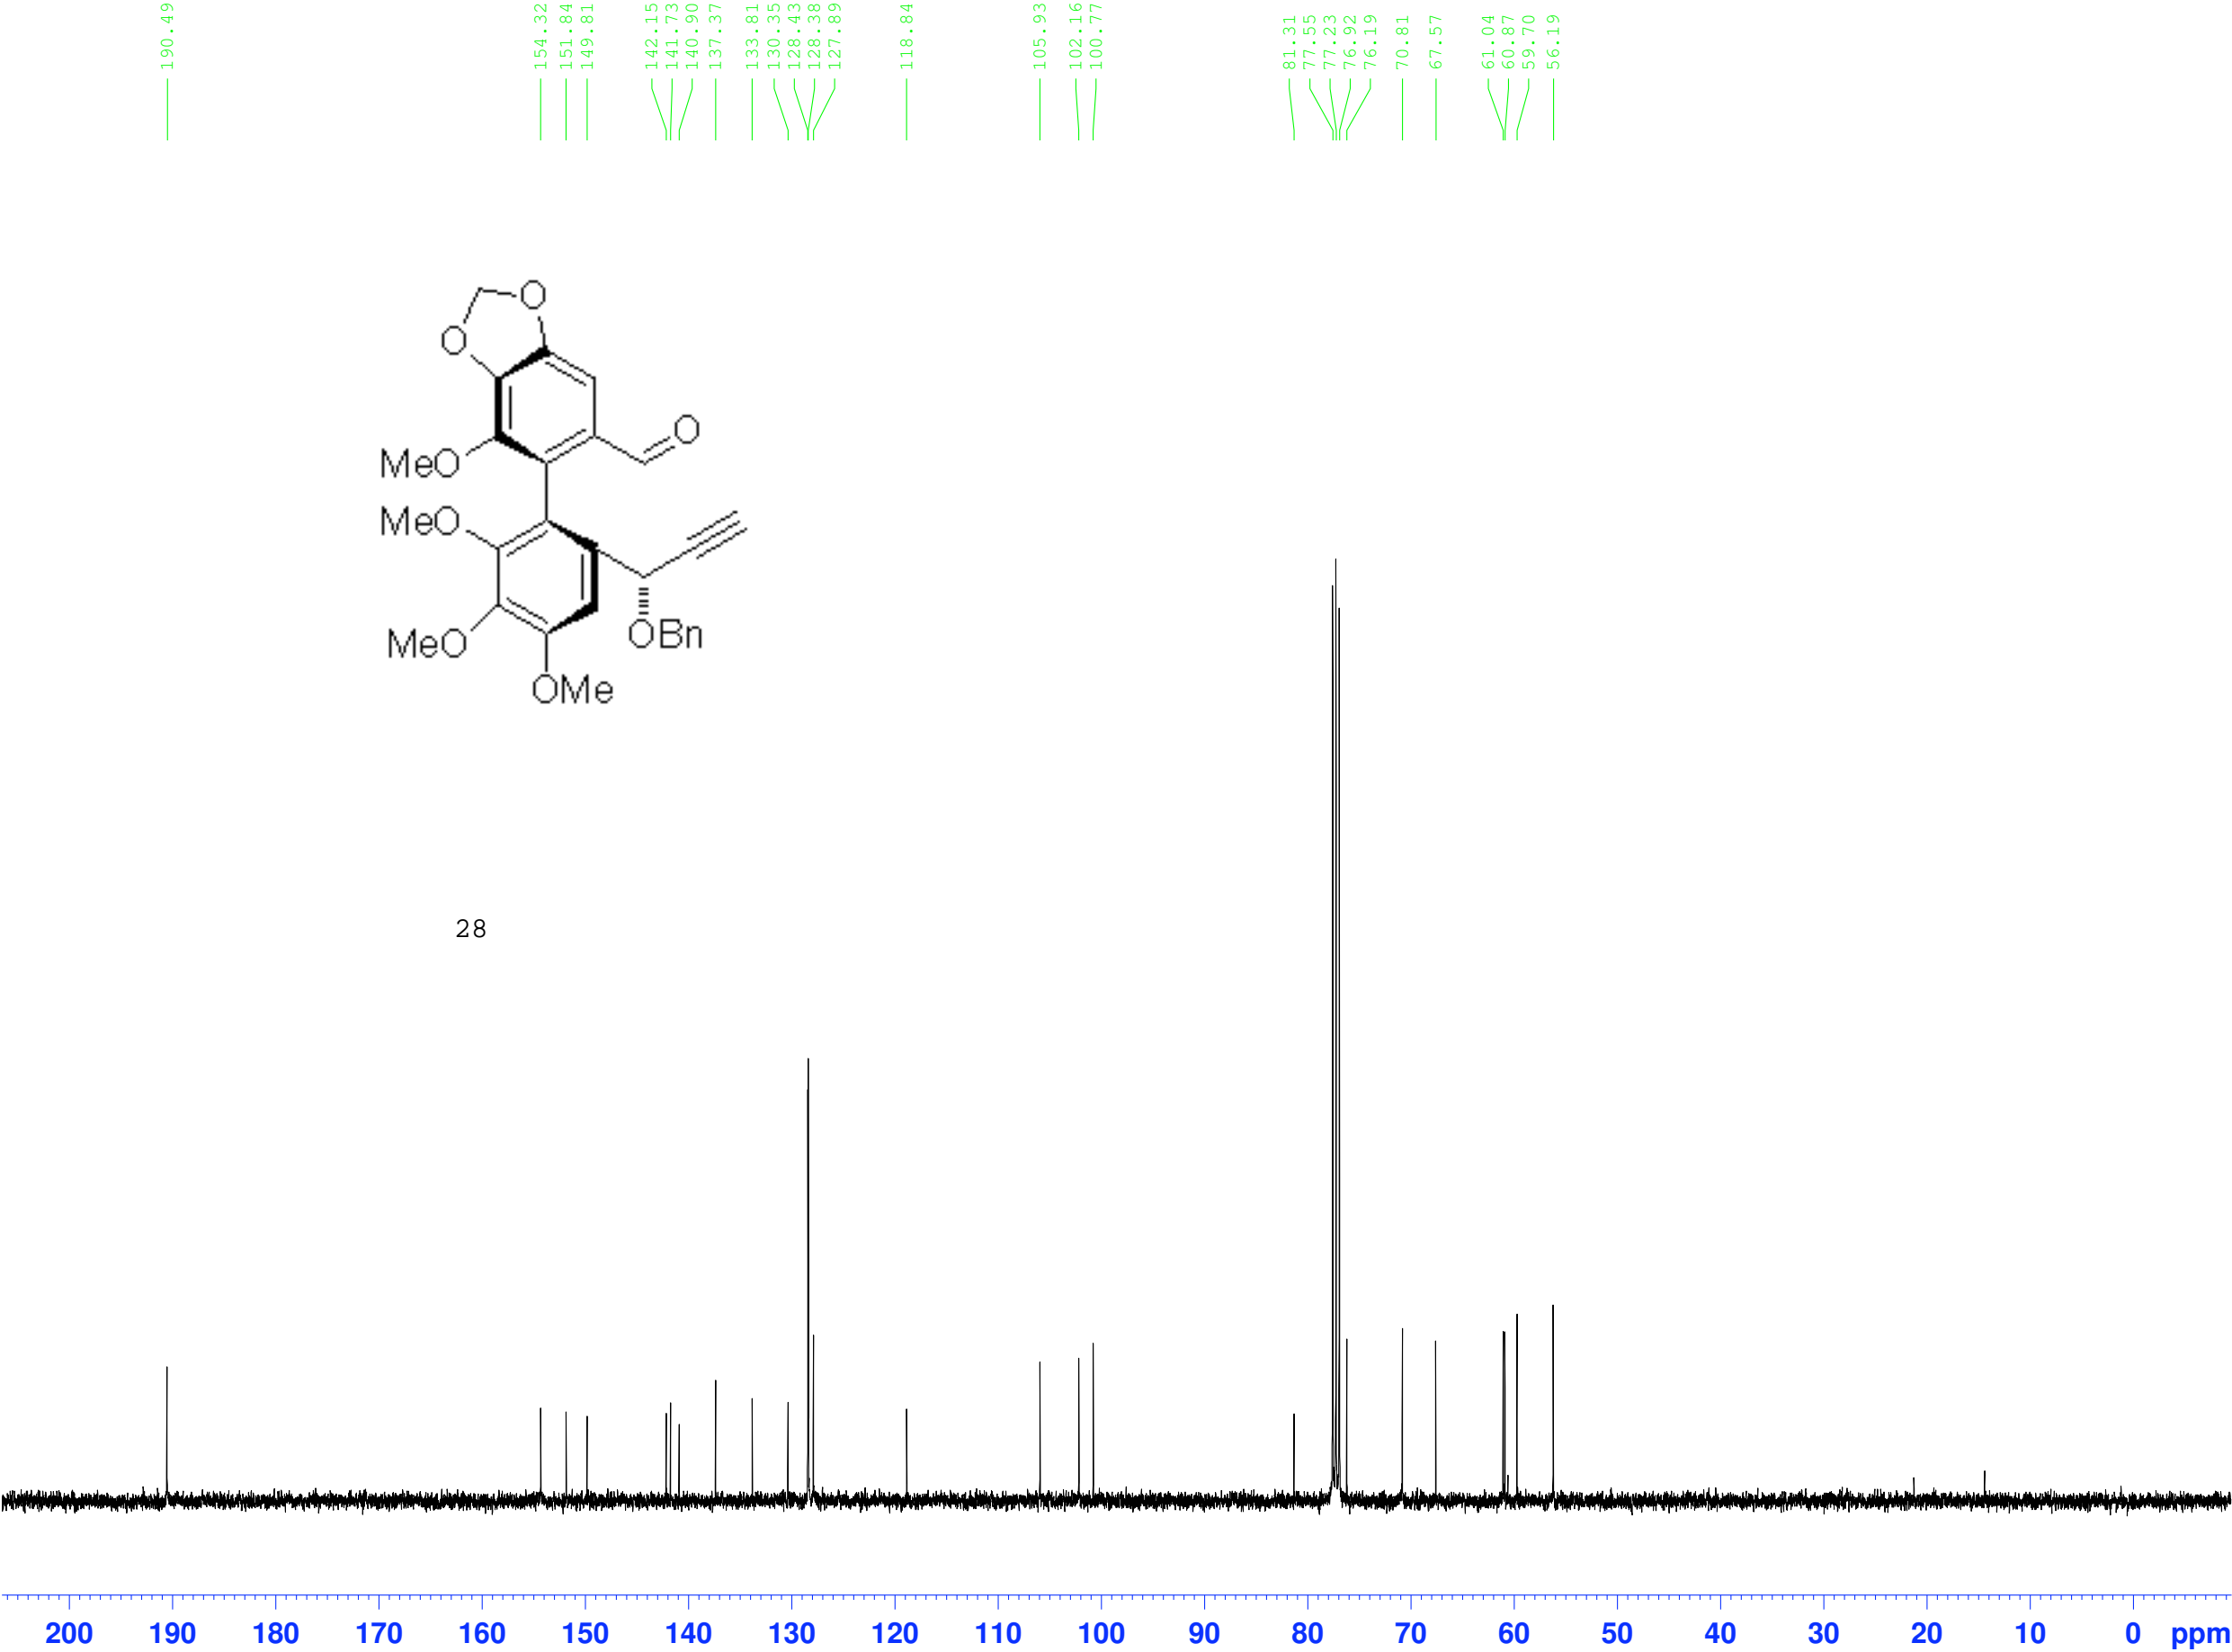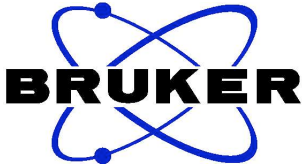

```
Current Data Parameters
NAME          Rs-6-164
EXPNO          2
PROCNO         1
```

```

F2 - Acquisition Parameters
Date_                20101108
Time                 10.10
INSTRUM              spect
PROBHD      5 mm QNP 1H/13
PULPROG              zgpg30
TD                   65536
SOLVENT              CDC13
NS                   374
DS                   4
SWH      23980.814 Hz
FIDRES      0.365918 Hz
AQ      1.3664756 sec
RG      5792.6
DW      20.850 use
DE      6.00 use
TE      300.2 K
D1      2.00000000 sec
d11      0.03000000 sec
DELTA      1.89999998 sec
TD0      1

```

```
===== CHANNEL f1 =====
NUC1                13C
P1                  10.50 use
PL1                 0.00 dB
SFO1               100.6228298 MHz
```

```
===== CHANNEL f2 =====
CPDPRG2          waltz16
NUC2             1H
PCPD2            80.00 use
PL2              -6.00 dB
PL12             14.56 dB
PL13             16.50 dB
SFO2             400.1316005 MHz
```

```
F2 - Processing parameters
SI                      32768
SF                      100.6127508 MHz
WDW                      EM
SSB                      0
LB                      1.00 Hz
GB                      0
PC                      1.40
```

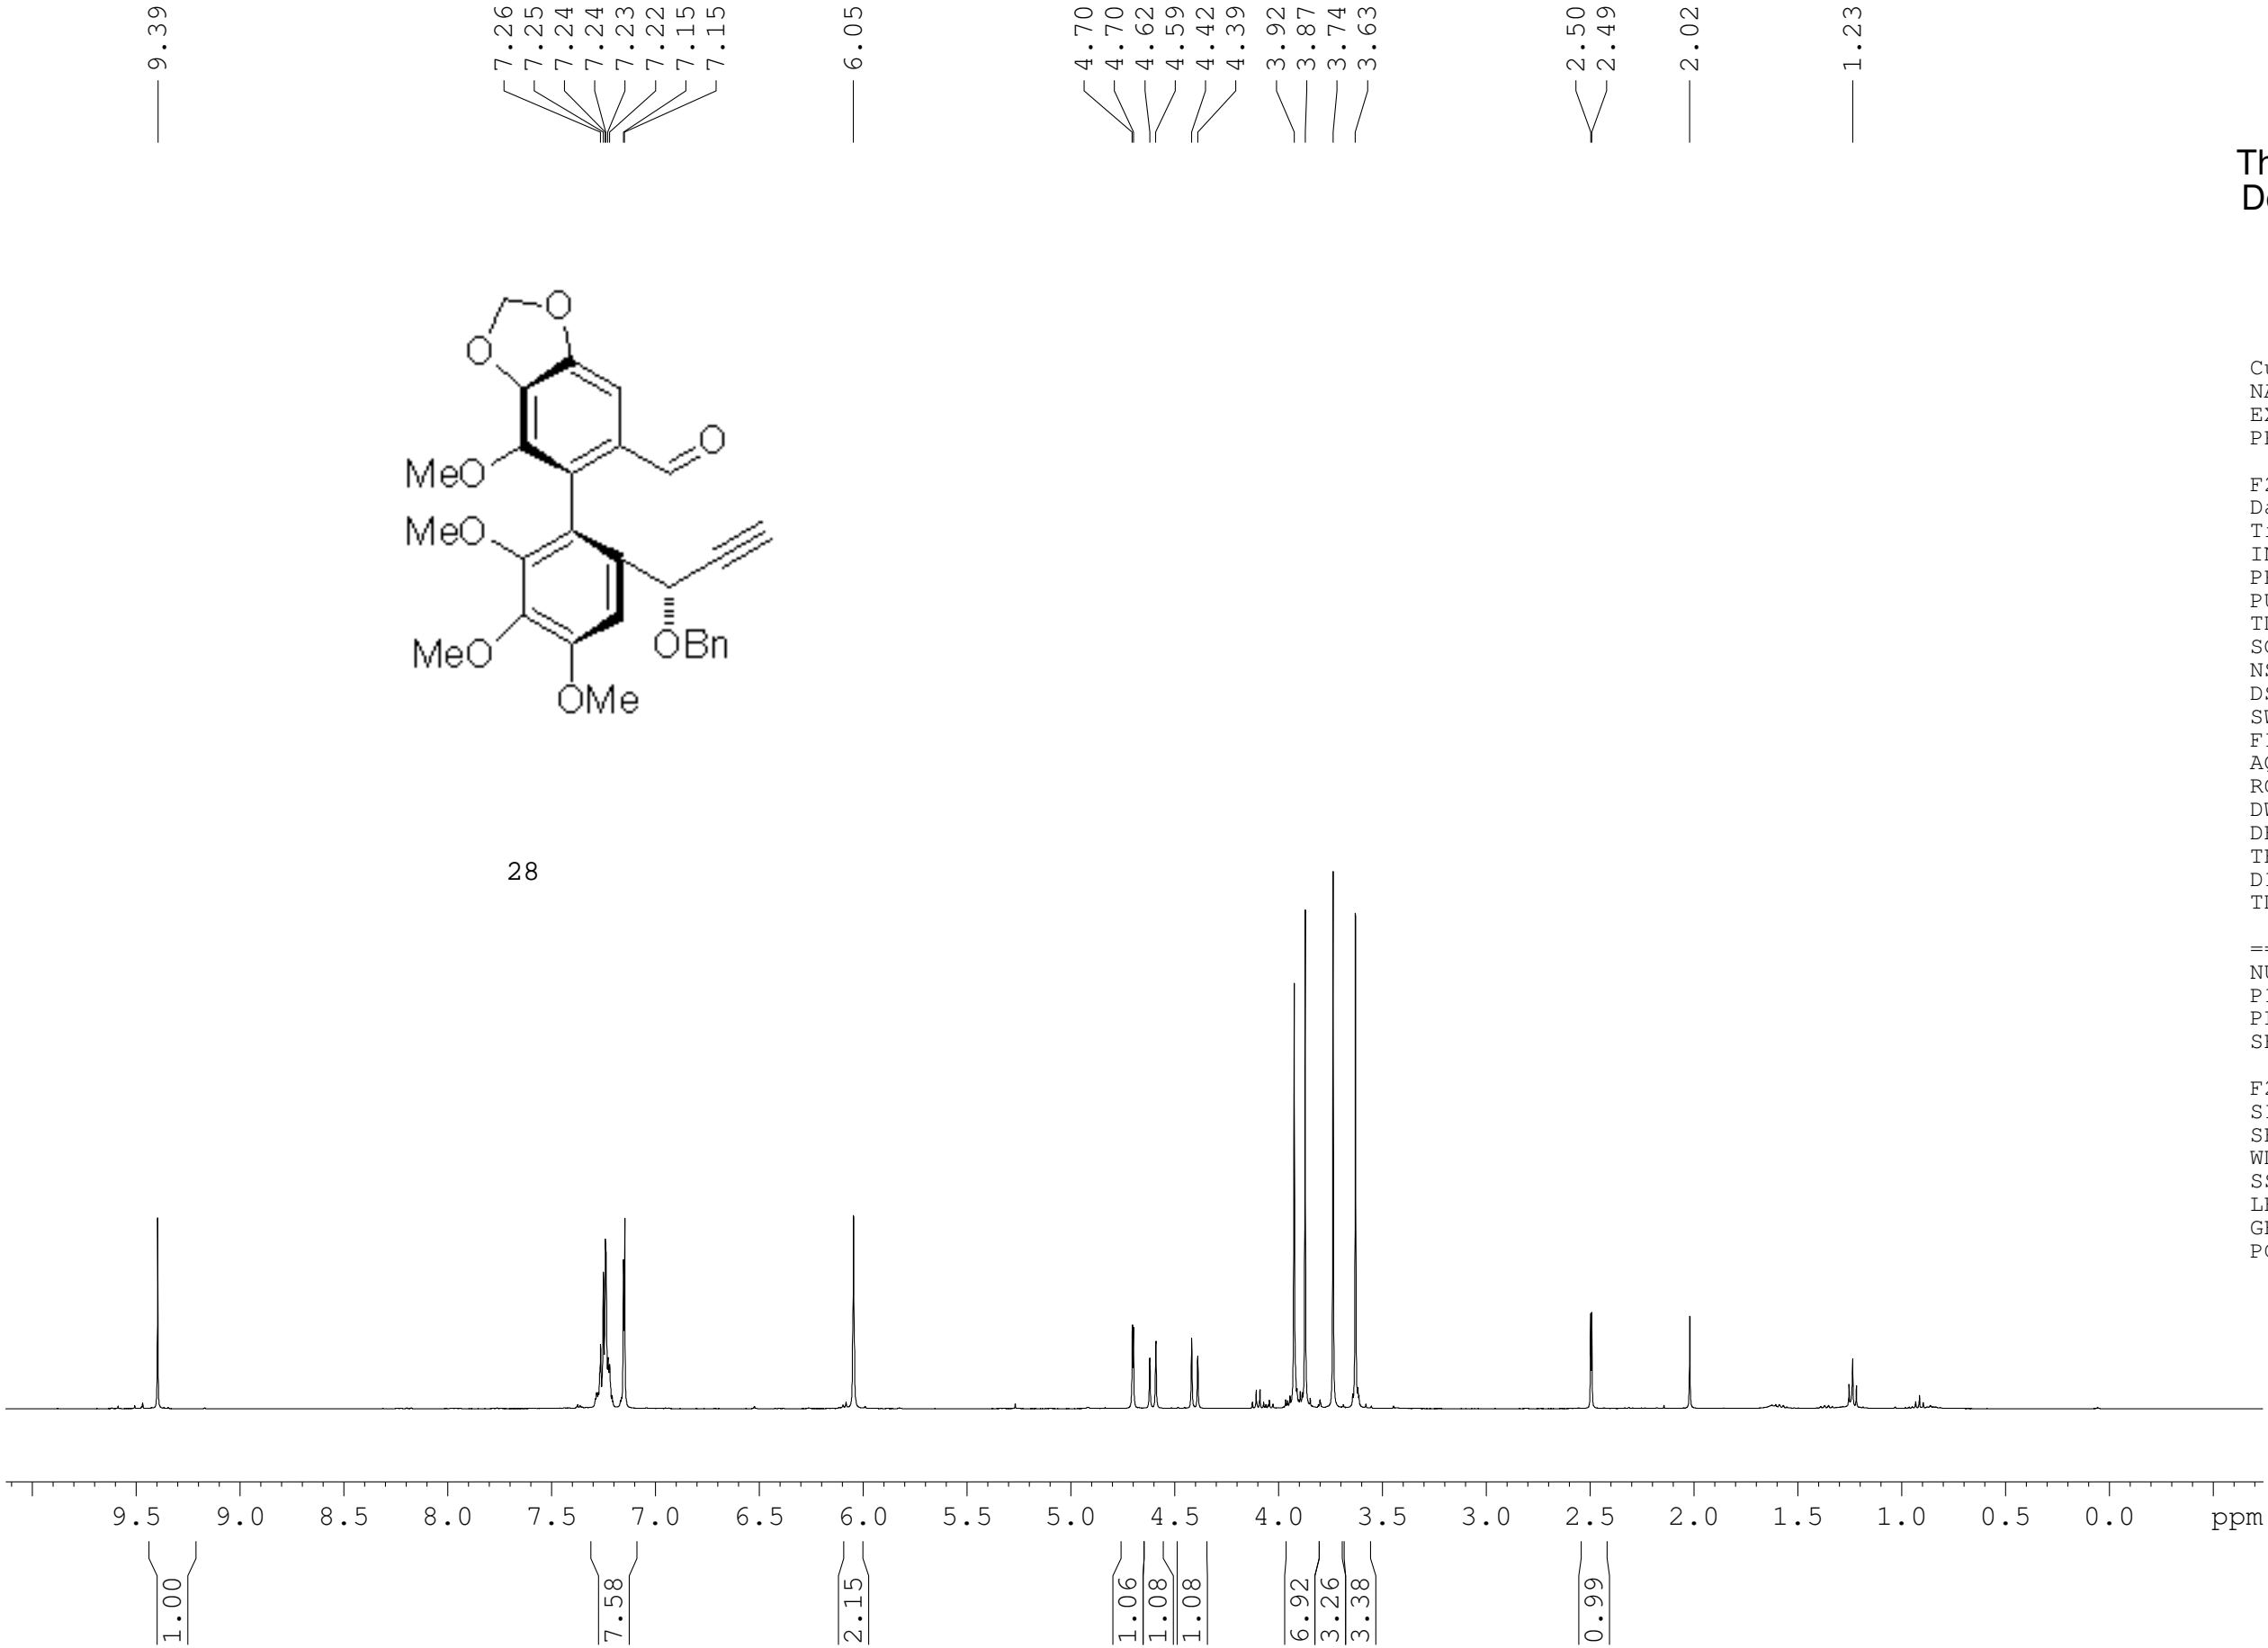

The Ohio State University  
Department of Chemistry  
NMR Facility

Current Data Parameters  
NAME Rs-6-164  
EXPNO 1  
PROCNO 1

F2 - Acquisition Parameters  
Date\_ 20101108  
Time 10.03  
INSTRUM spect  
PROBHD 5 mm QNP 1H/13  
PULPROG zg30  
TD 65536  
SOLVENT CDCl3  
NS 16  
DS 2  
SWH 8278.146 Hz  
FIDRES 0.126314 Hz  
AQ 3.9584243 sec  
RG 90.5  
DW 60.400 usec  
DE 6.00 usec  
TE 300.2 K  
D1 1.00000000 sec  
TD0 1

===== CHANNEL f1 =====  
NUC1 1H  
P1 13.00 usec  
PL1 0.00 dB  
SFO1 400.1324710 MHz

F2 - Processing parameters  
SI 32768  
SF 400.1300168 MHz  
WDW EM  
SSB 0  
LB 0.30 Hz  
GB 0  
PC 1.00

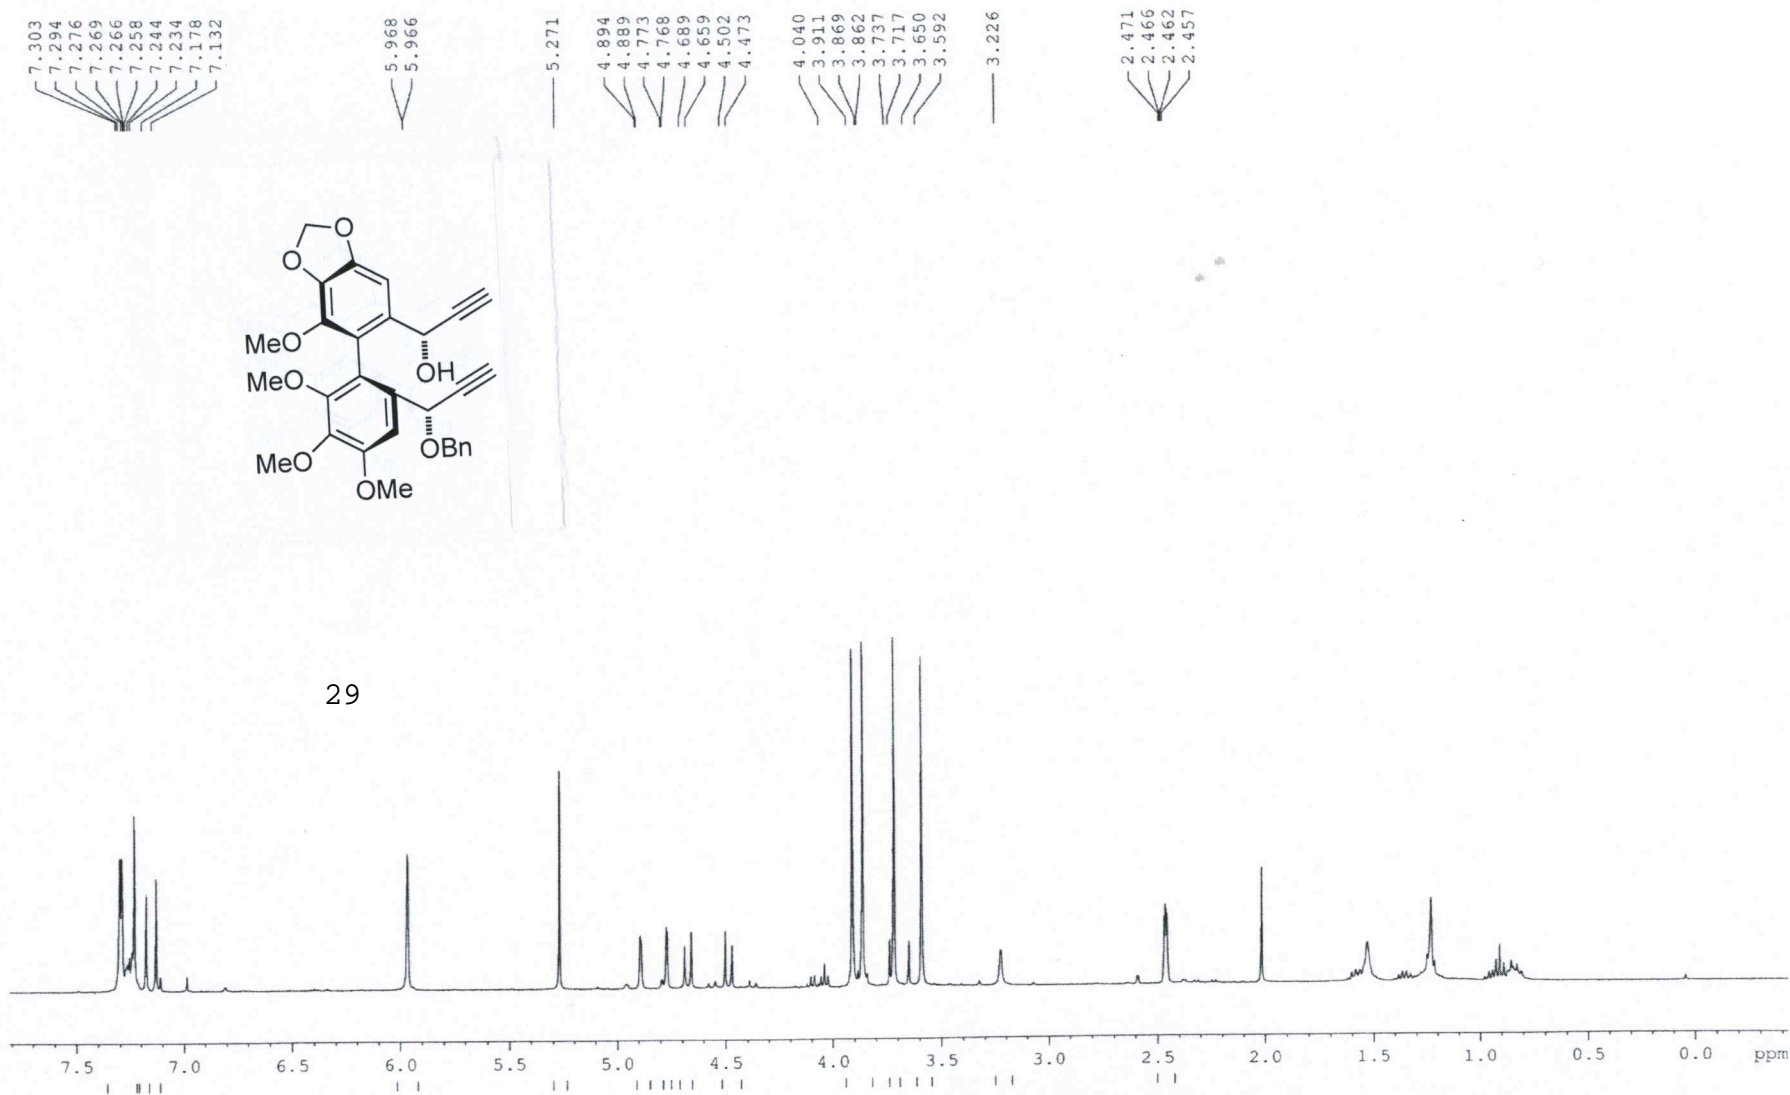

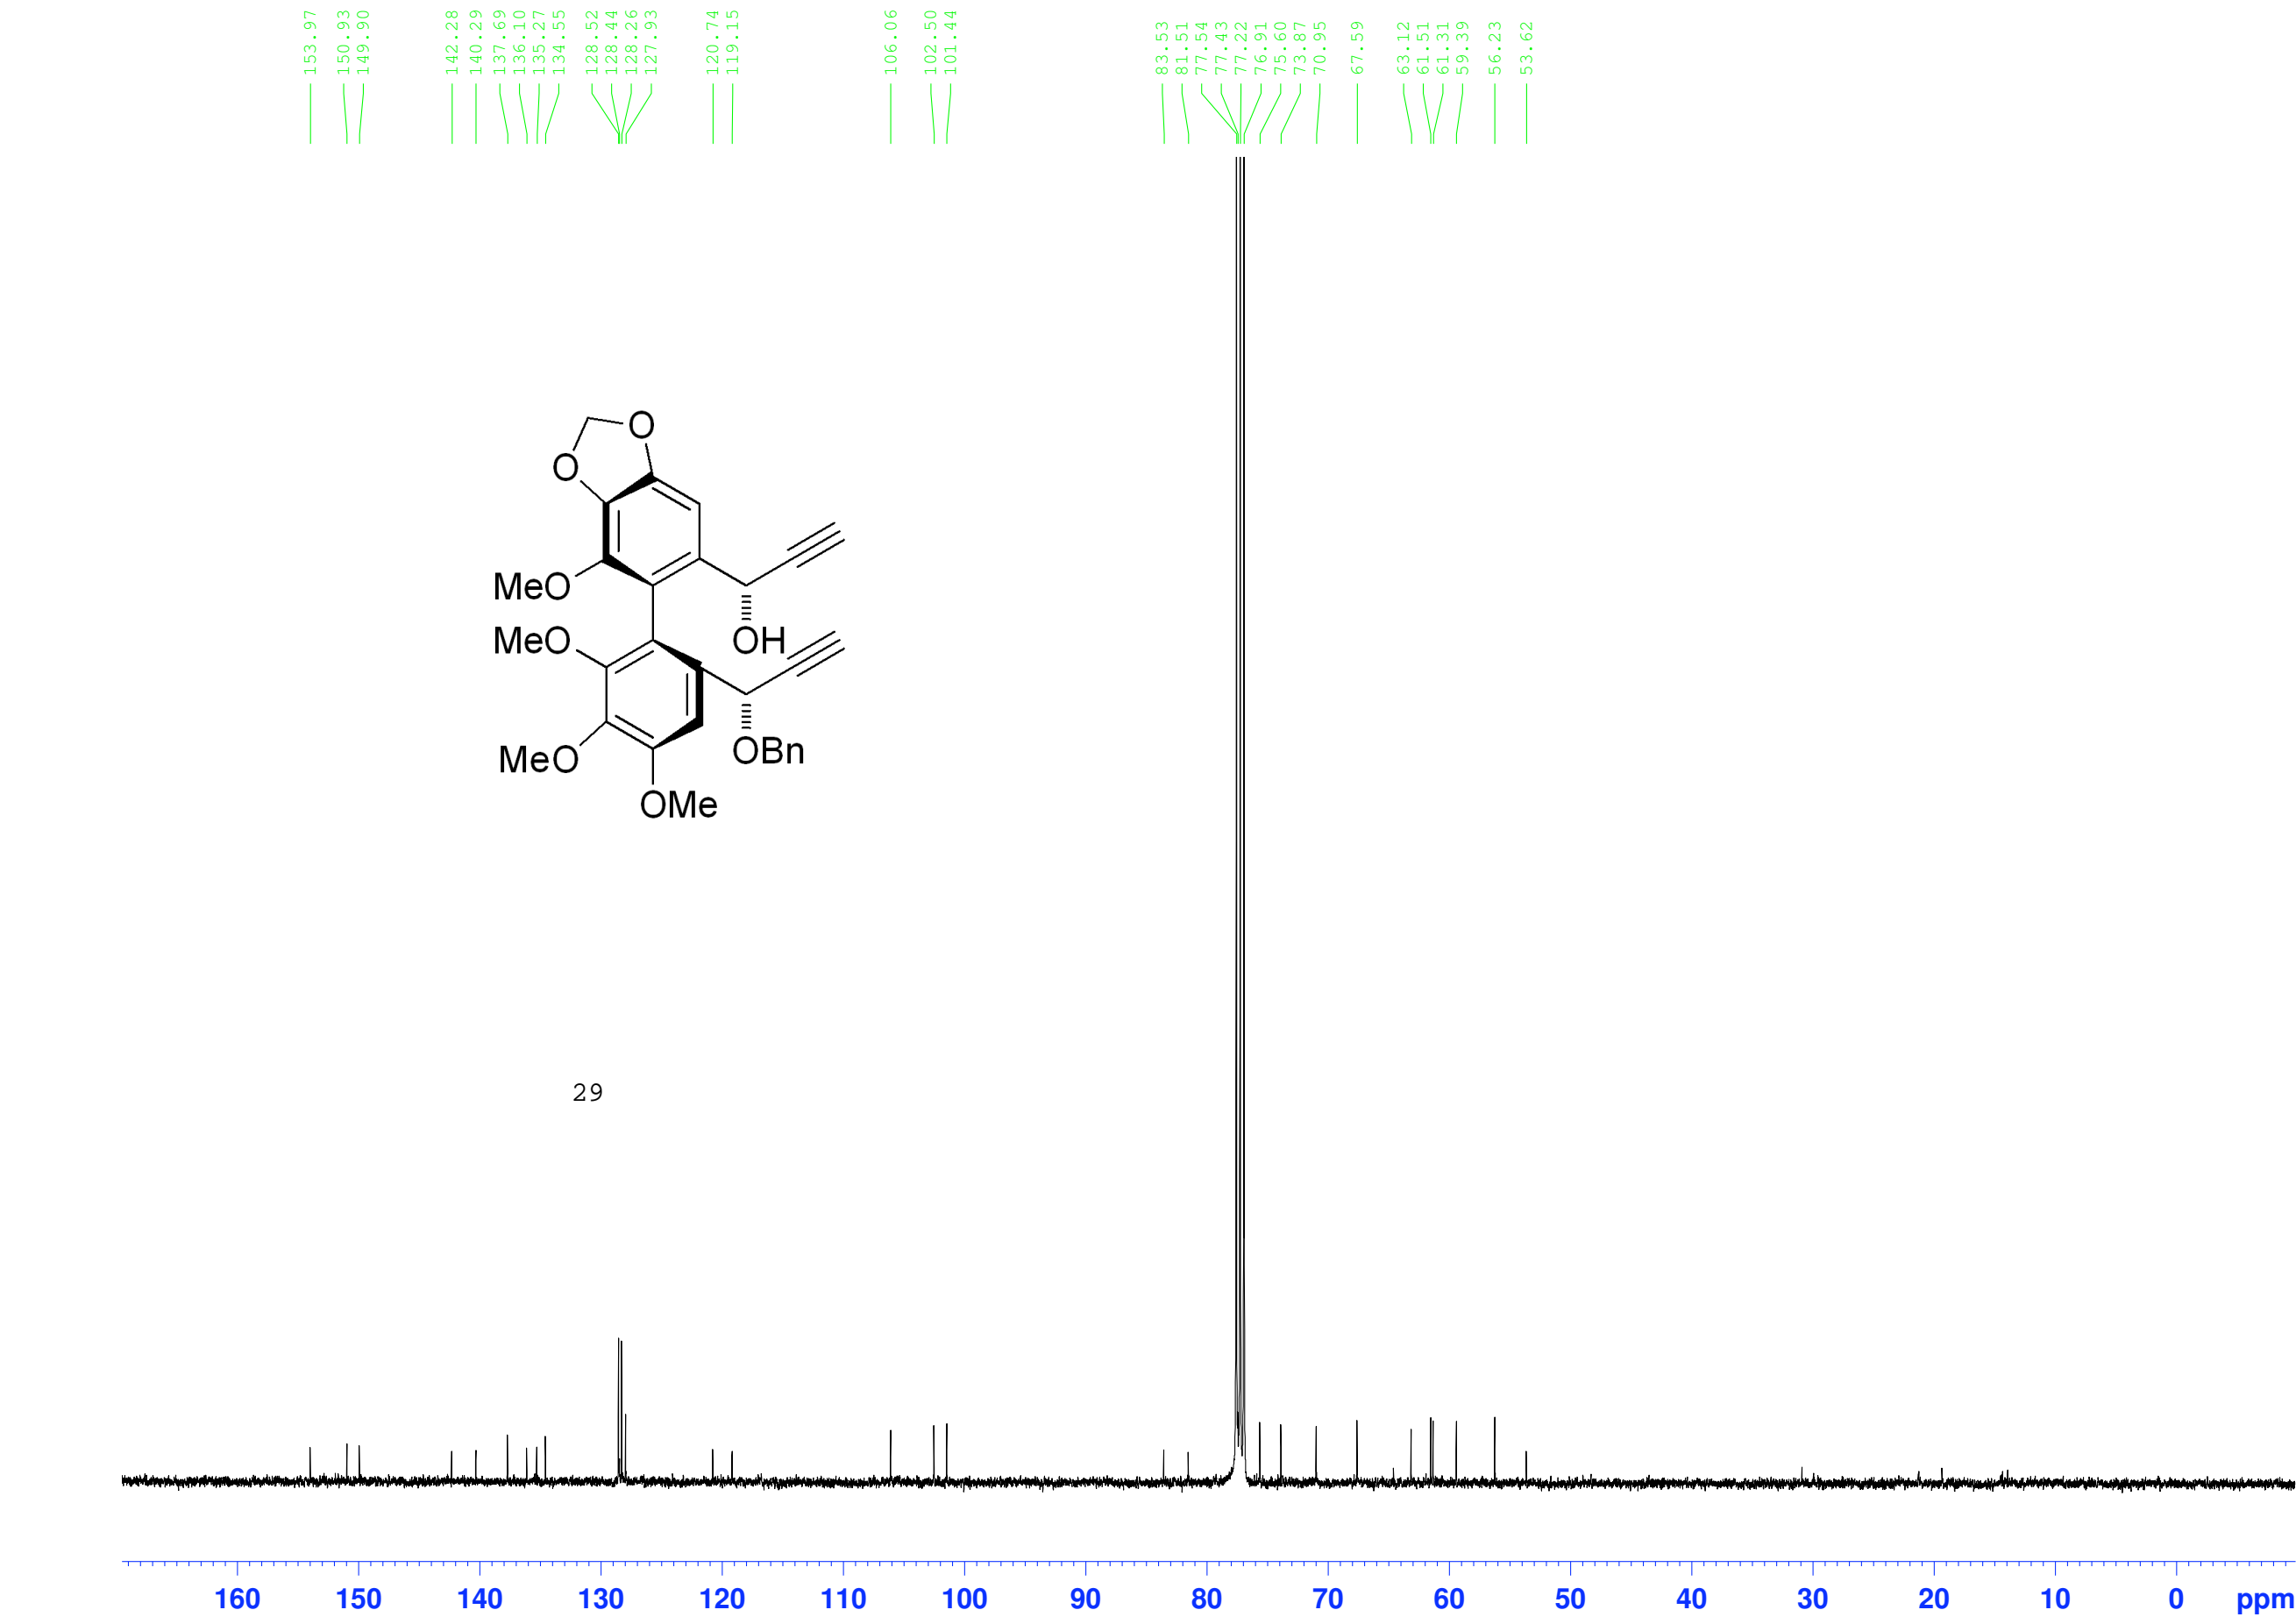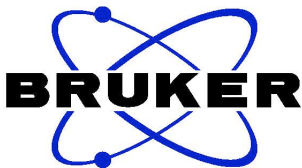

Current Data Parameters  
NAME Rs-6-185-MP  
EXPNO 2  
PROCNO 1

F2 - Acquisition Parameters  
Date\_ 20101120  
Time 16.33  
INSTRUM spect  
PROBHD 5 mm QNP 1H/13  
PULPROG zgpg30  
TD 65536  
SOLVENT CDCl3  
NS 5036  
DS 4  
SWH 23980.814 Hz  
FIDRES 0.365918 Hz  
AQ 1.3664756 sec  
RG 4096  
DW 20.850 use  
DE 6.00 use  
TE 300.2 K  
D1 2.00000000 sec  
d11 0.03000000 sec  
DELTA 1.89999998 sec  
TD0 1

===== CHANNEL f1 =====  
NUC1 13C  
P1 10.50 use  
PL1 0.00 dB  
SFO1 100.6228298 MHz

===== CHANNEL f2 =====  
CPDPRG2 waltz16  
NUC2 1H  
PCPD2 80.00 use  
PL2 -6.00 dB  
PL12 14.56 dB  
PL13 16.50 dB  
SFO2 400.1316005 MHz

F2 - Processing parameters  
SI 32768  
SF 100.6127480 MHz  
WDW EM  
SSB 0  
LB 1.00 Hz  
GB 0  
PC 1.40

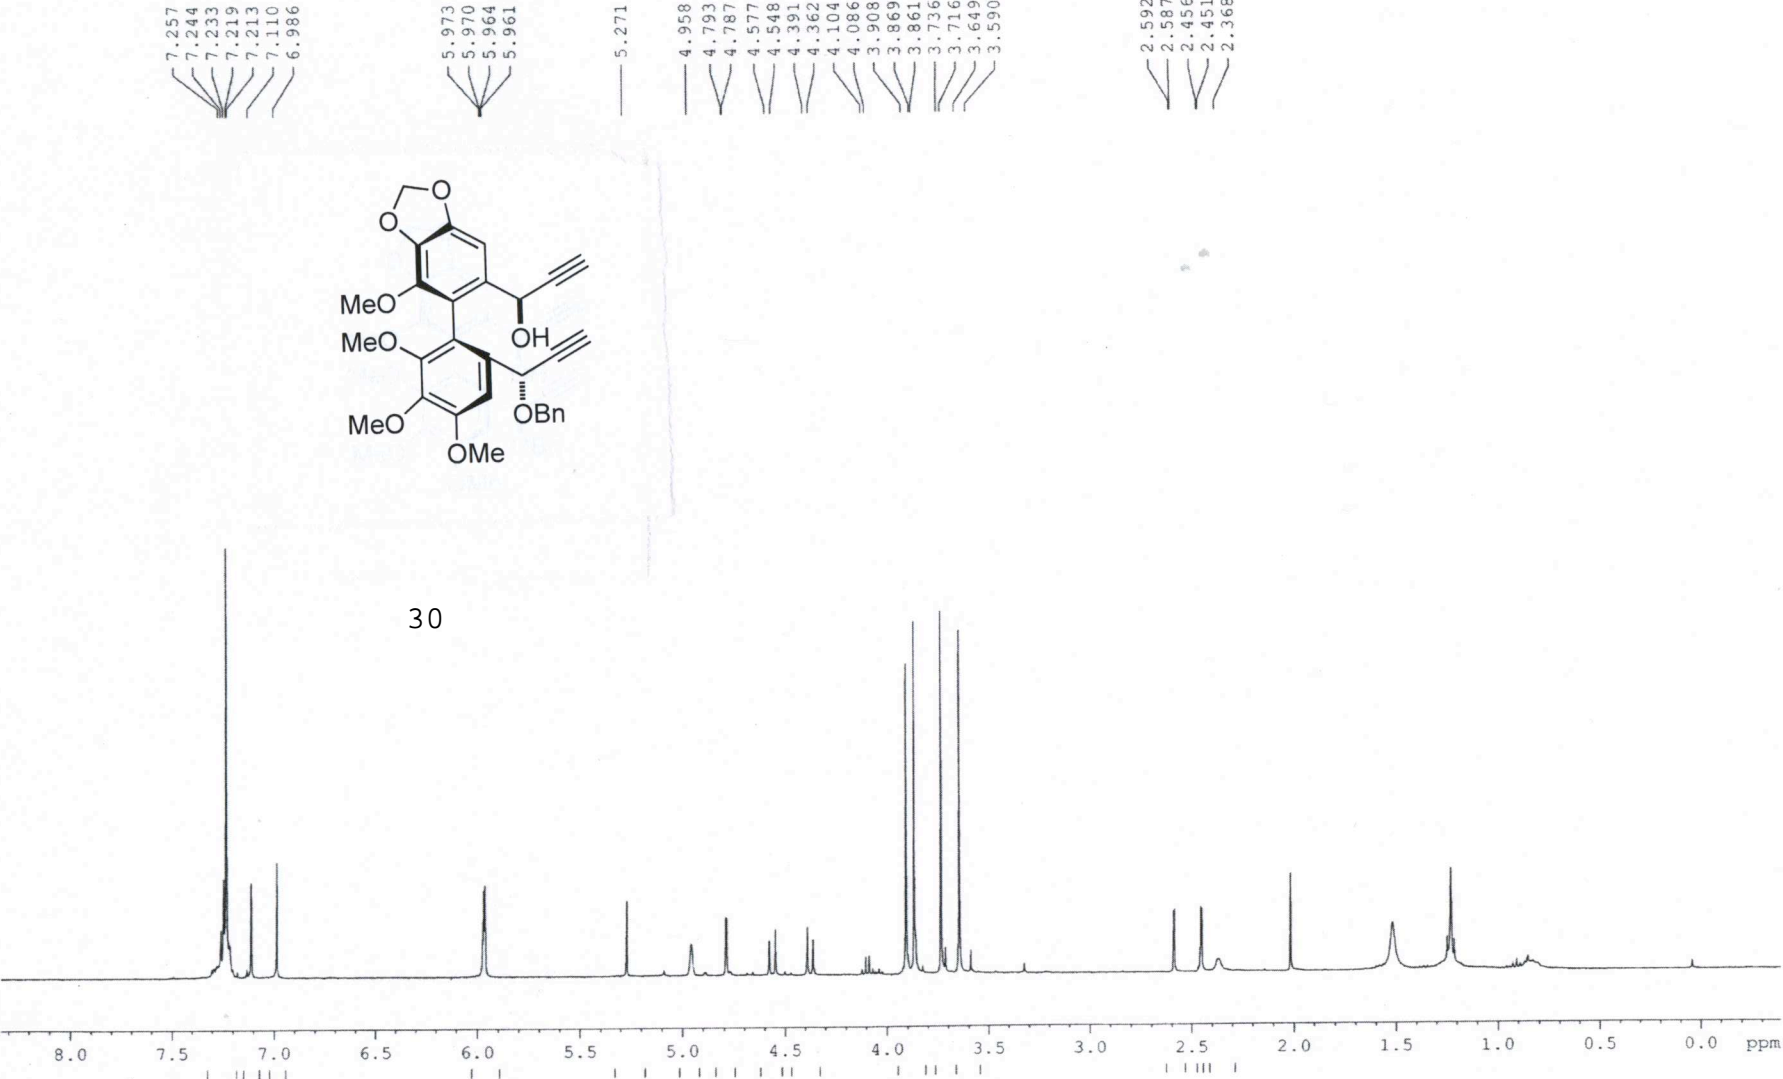



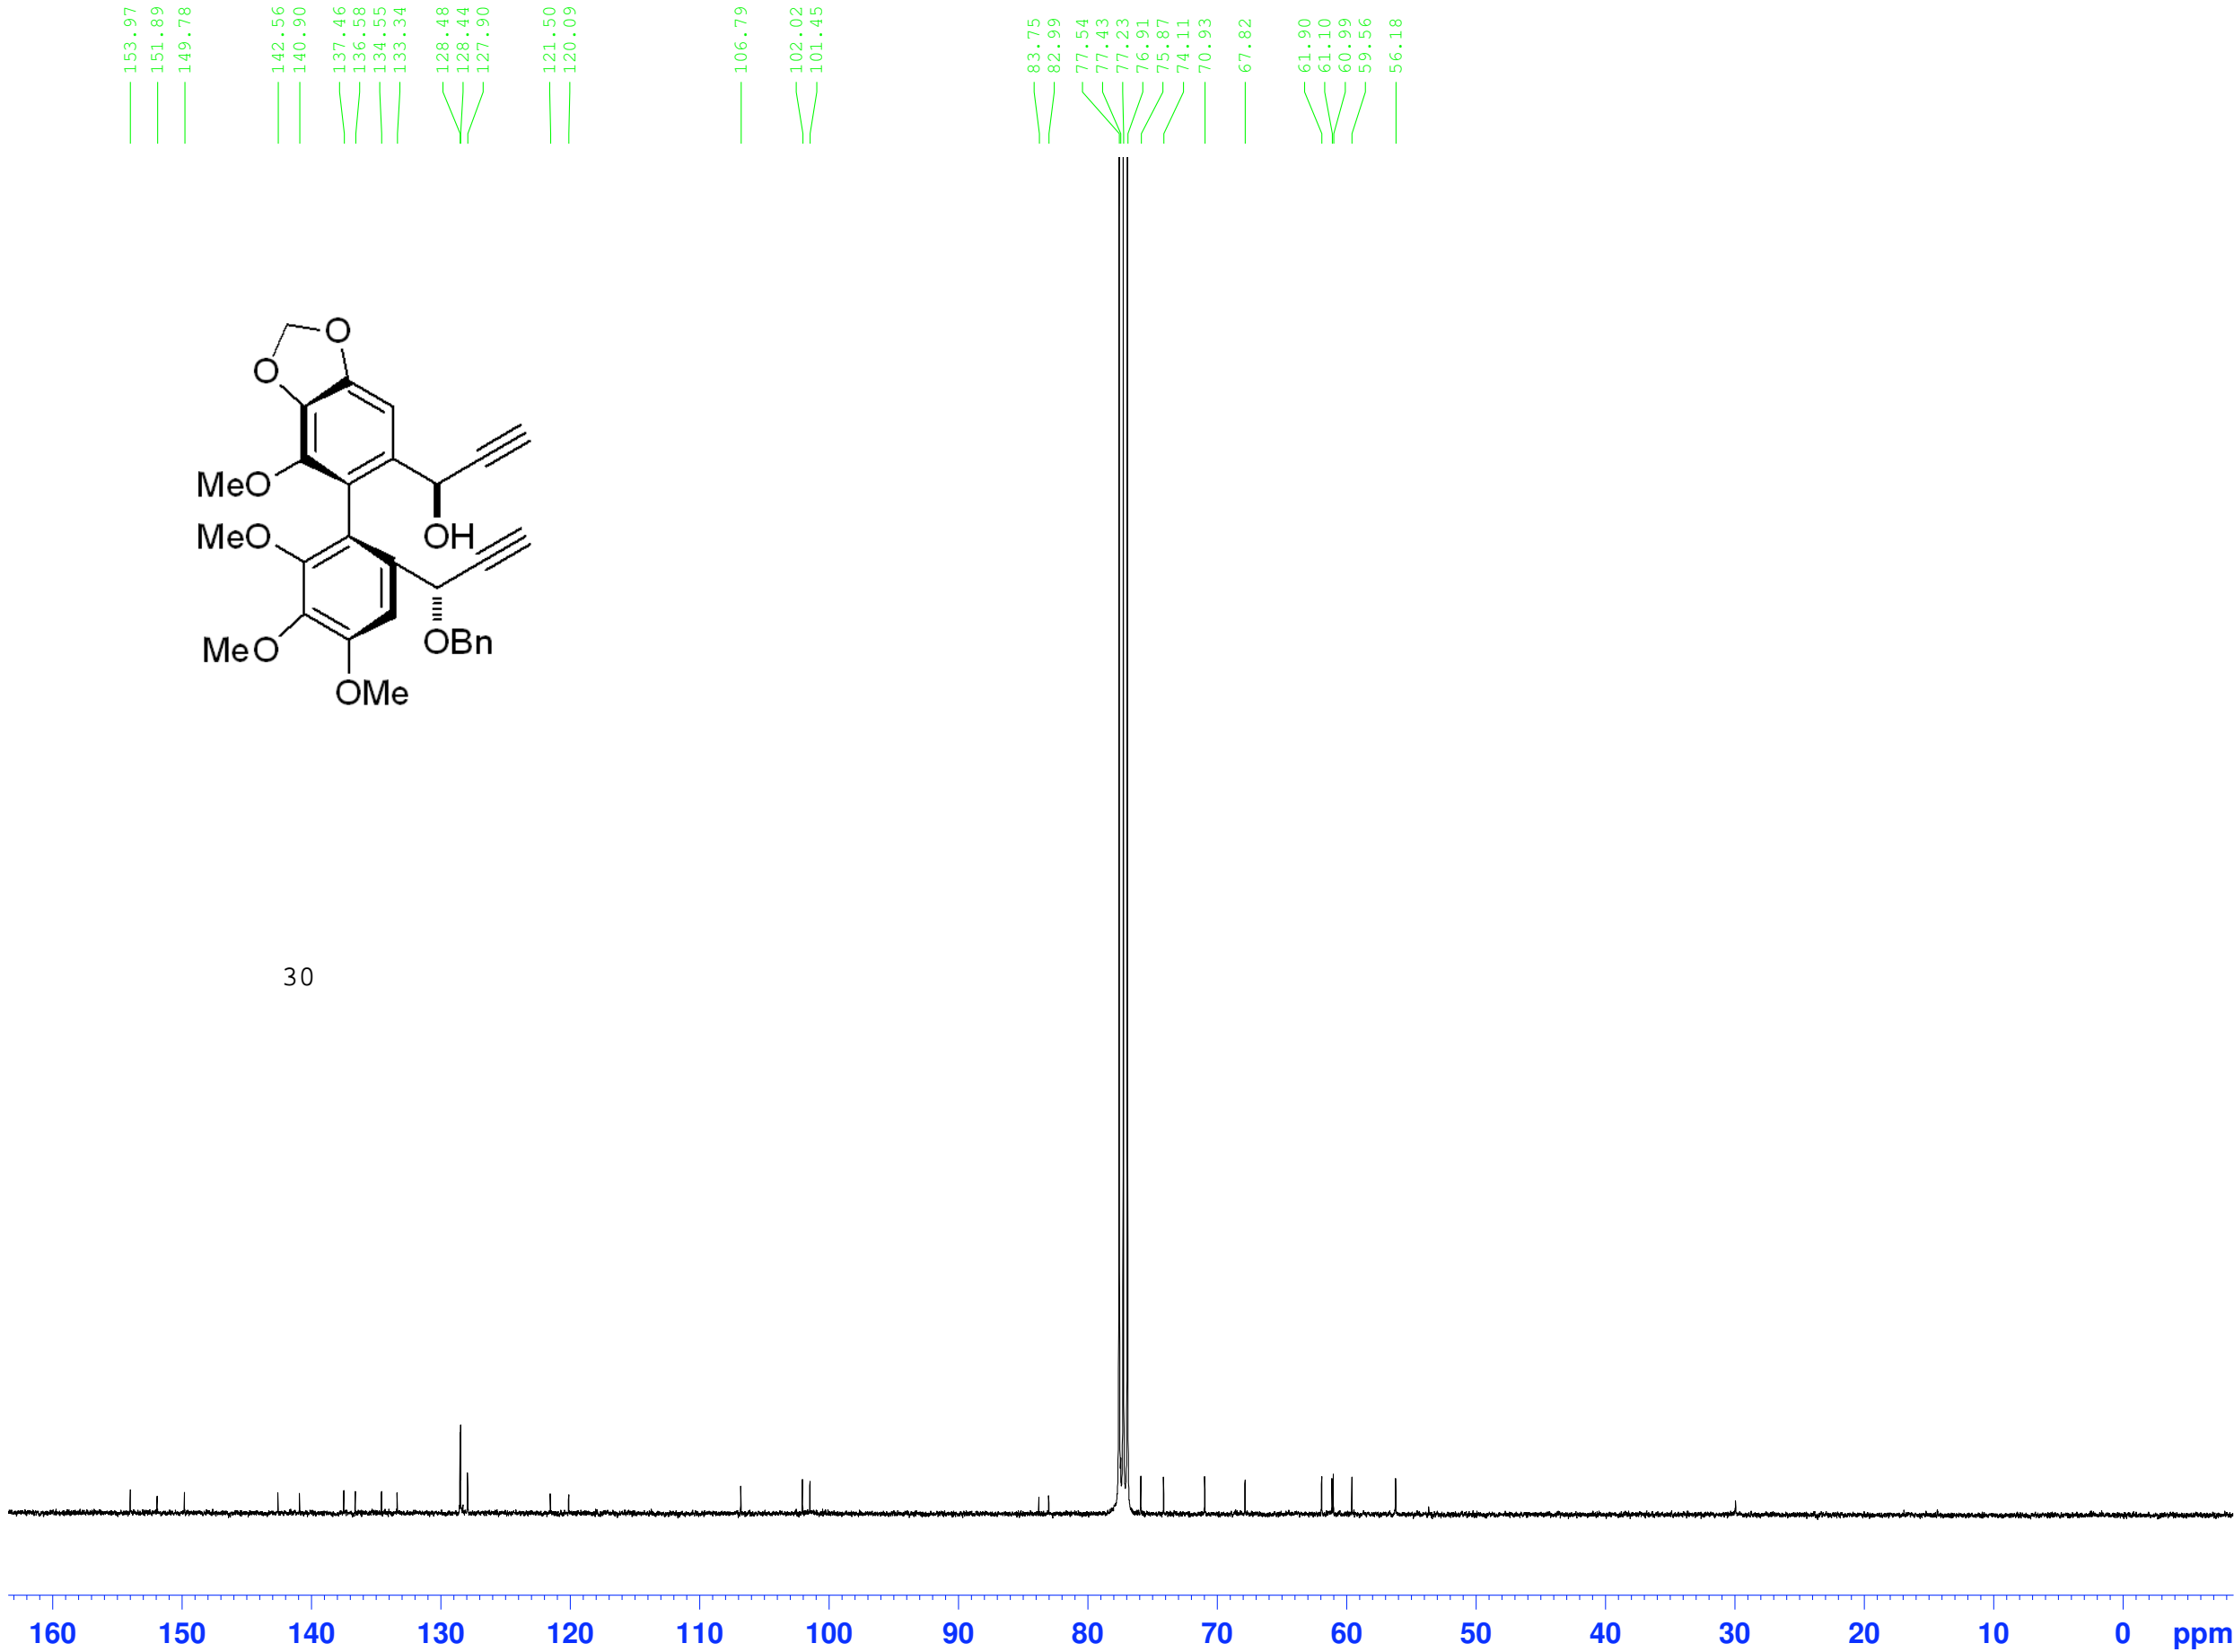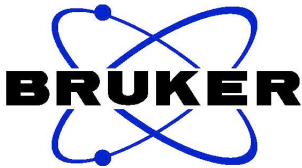

Current Data Parameters  
NAME Rs-6-185-LP  
EXPNO 2  
PROCNO 1

F2 - Acquisition Parameters  
Date\_ 20101120  
Time 21.29  
INSTRUM spect  
PROBHD 5 mm QNP 1H/13  
PULPROG zgpg30  
TD 65536  
SOLVENT CDCl3  
NS 11154  
DS 4  
SWH 23980.814 Hz  
FIDRES 0.365918 Hz  
AQ 1.3664756 sec  
RG 5792.6  
DW 20.850 use  
DE 6.00 use  
TE 300.2 K  
D1 2.00000000 sec  
d11 0.03000000 sec  
DELTA 1.89999998 sec  
TD0 1

===== CHANNEL f1 =====  
NUC1 13C  
P1 10.50 use  
PL1 0.00 dB  
SFO1 100.6228298 MHz

===== CHANNEL f2 =====  
CPDPRG2 waltz16  
NUC2 1H  
PCPD2 80.00 use  
PL2 -6.00 dB  
PL12 14.56 dB  
PL13 16.50 dB  
SFO2 400.1316005 MHz

F2 - Processing parameters  
SI 32768  
SF 100.6127477 MHz  
WDW EM  
SSB 0  
LB 1.00 Hz  
GB 0  
PC 1.40

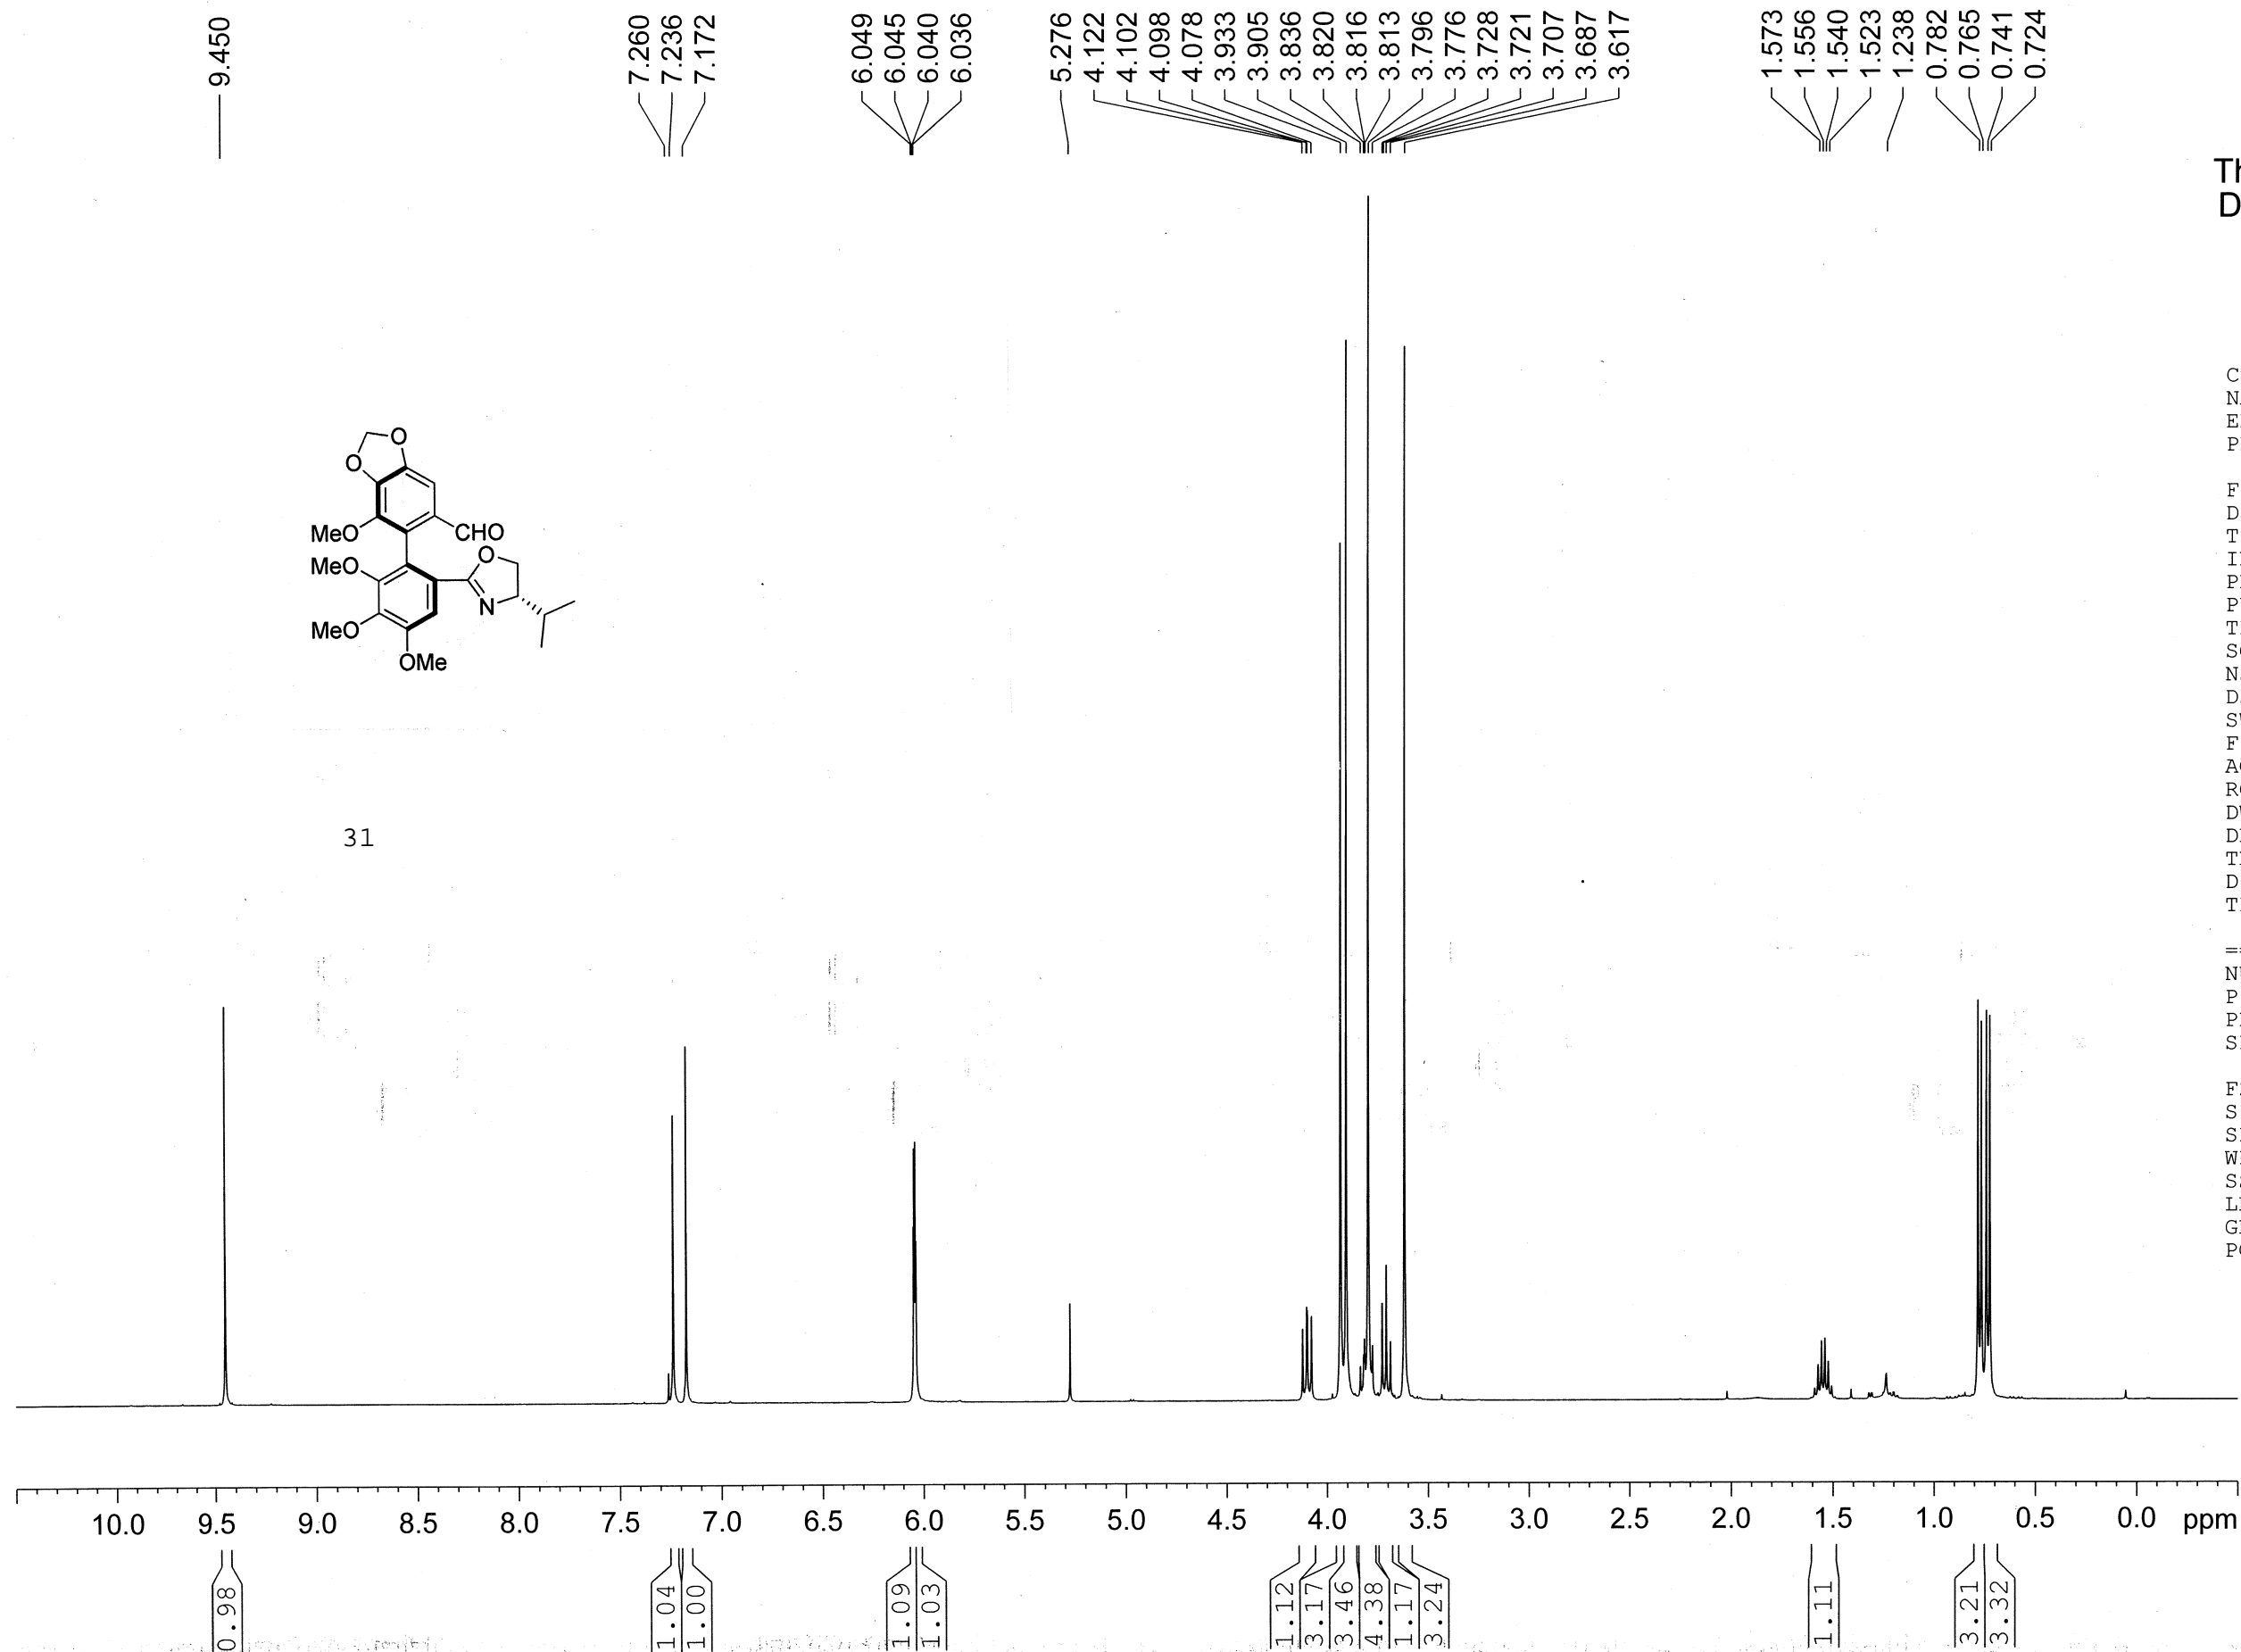

The Ohio State University  
Department of Chemistry  
NMR Facility

Current Data Parameters  
NAME Wgong-III-224 p  
EXPNO 504  
PROCNO 1

F2 - Acquisition Parameters  
Date\_ 20110510  
Time\_ 12.19  
INSTRUM spect  
PROBHD 5 mm QNP 1H/13  
PULPROG zg30  
TD 65536  
SOLVENT CDCl3  
NS 16  
DS 2  
SWH 8278.146 Hz  
FIDRES 0.126314 Hz  
AQ 3.9584243 sec  
RG 71.8  
DW 60.400 usec  
DE 6.00 usec  
TE 300.2 K  
D1 1.00000000 sec  
TD0 1

===== CHANNEL f1 =====  
NUC1 1H  
P1 14.50 usec  
PL1 0.00 dB  
SFO1 400.1324710 MHz

F2 - Processing parameters  
SI 32768  
SF 400.1300092 MHz  
WDW EM  
SSB 0  
LB 0.30 Hz  
GB 0  
PC 1.00

```

F2 - Acquisition Parameters
Date_                20110510
Time_                12.24
INSTRUM              spect
PROBHD               5 mm QNP 1H/13
PULPROG              zgpg30
TD                   65536
SOLVENT              CDCl3
NS                   135
DS                   4
SWH                  23980.814 Hz
FIDRES              0.365918 Hz
AQ                   1.3664756 sec
RG                   912.3
DW                   20.850 usec
DE                   6.00 usec
TE                   300.2 K
D1                   2.00000000 sec
d11                  0.03000000 sec
DELTA                1.89999998 sec
TD0                  1

```

```

===== CHANNEL f2 =====
CPDPRG2                waltz16
NUC2                    1H
PCPD2                   80.00 usec
PL2                     -6.00 dB
PL12                    14.56 dB
PL13                    16.50 dB
SFO2                    400.1316005 MHz

```

```

F2 - Processing parameters
SI                      32768
SF                      100.6127690 MHz
WDW                      EM
SSB                      0
LB                      1.00 Hz
GB                      0
PC                      1.40

```

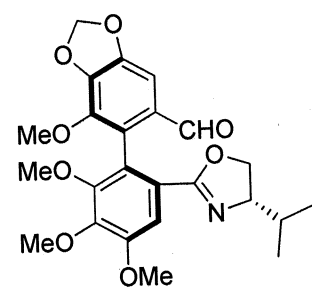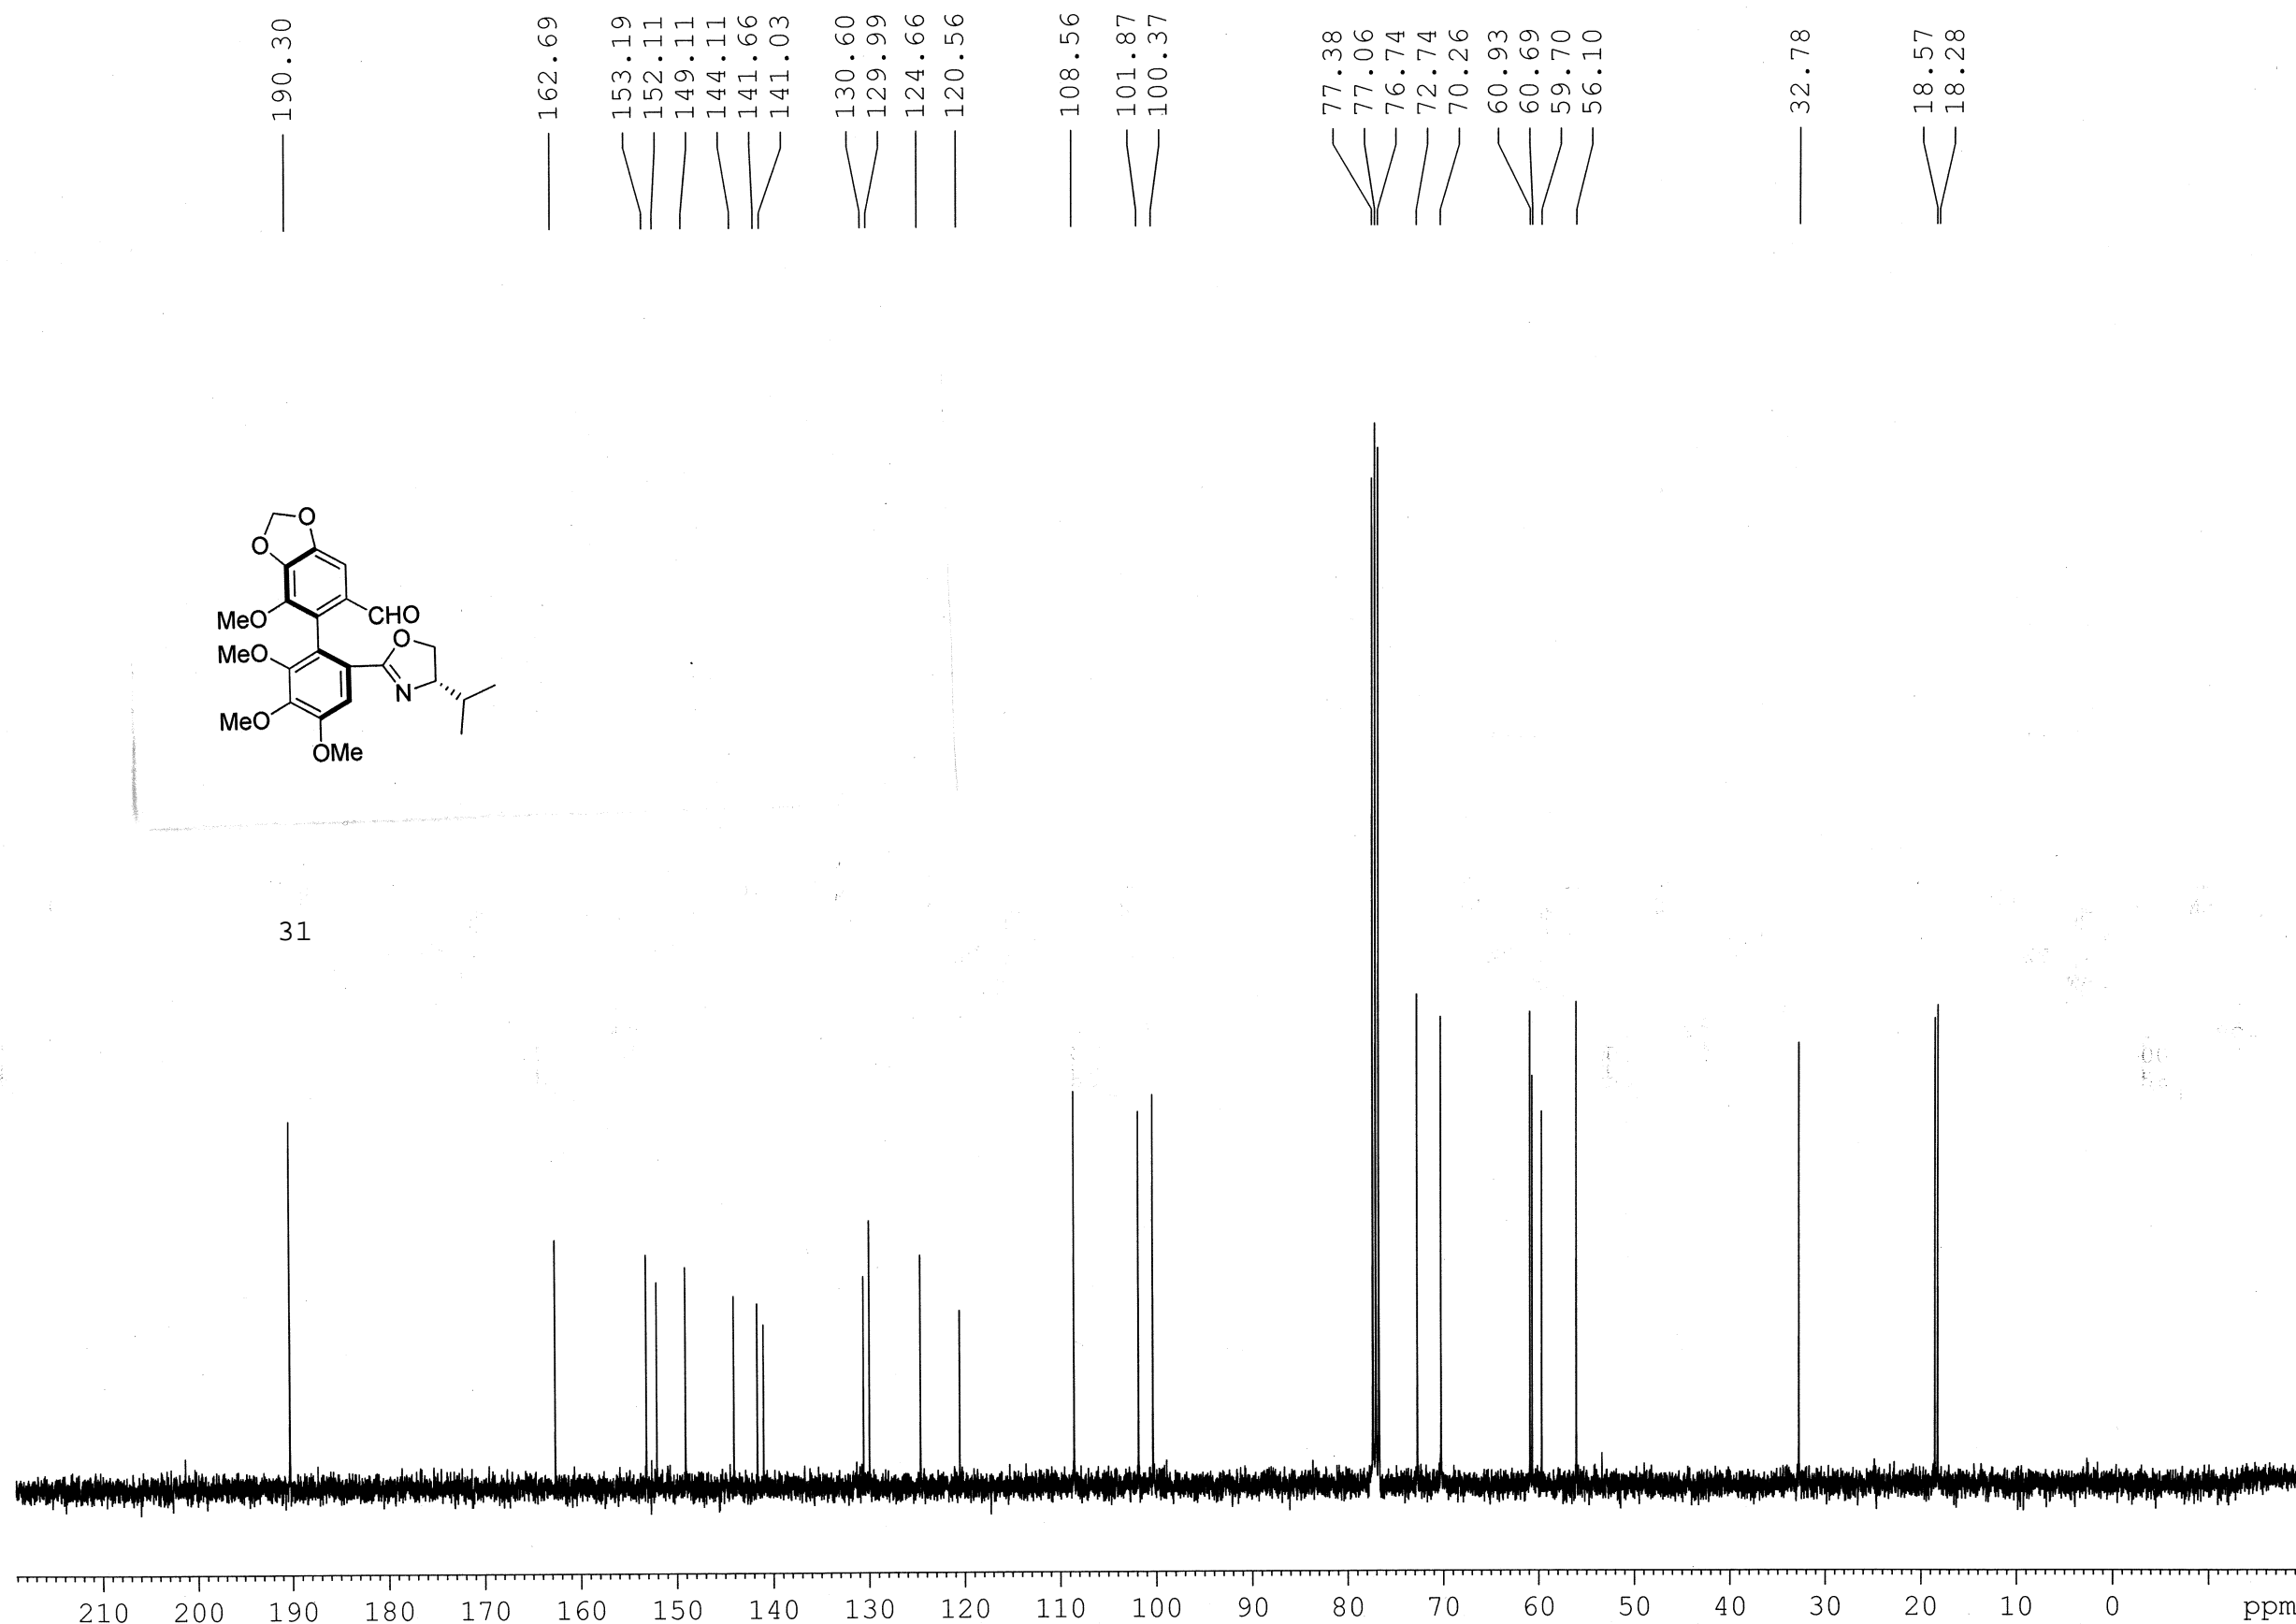

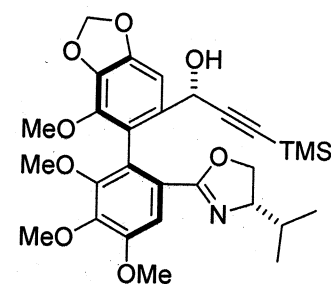

32

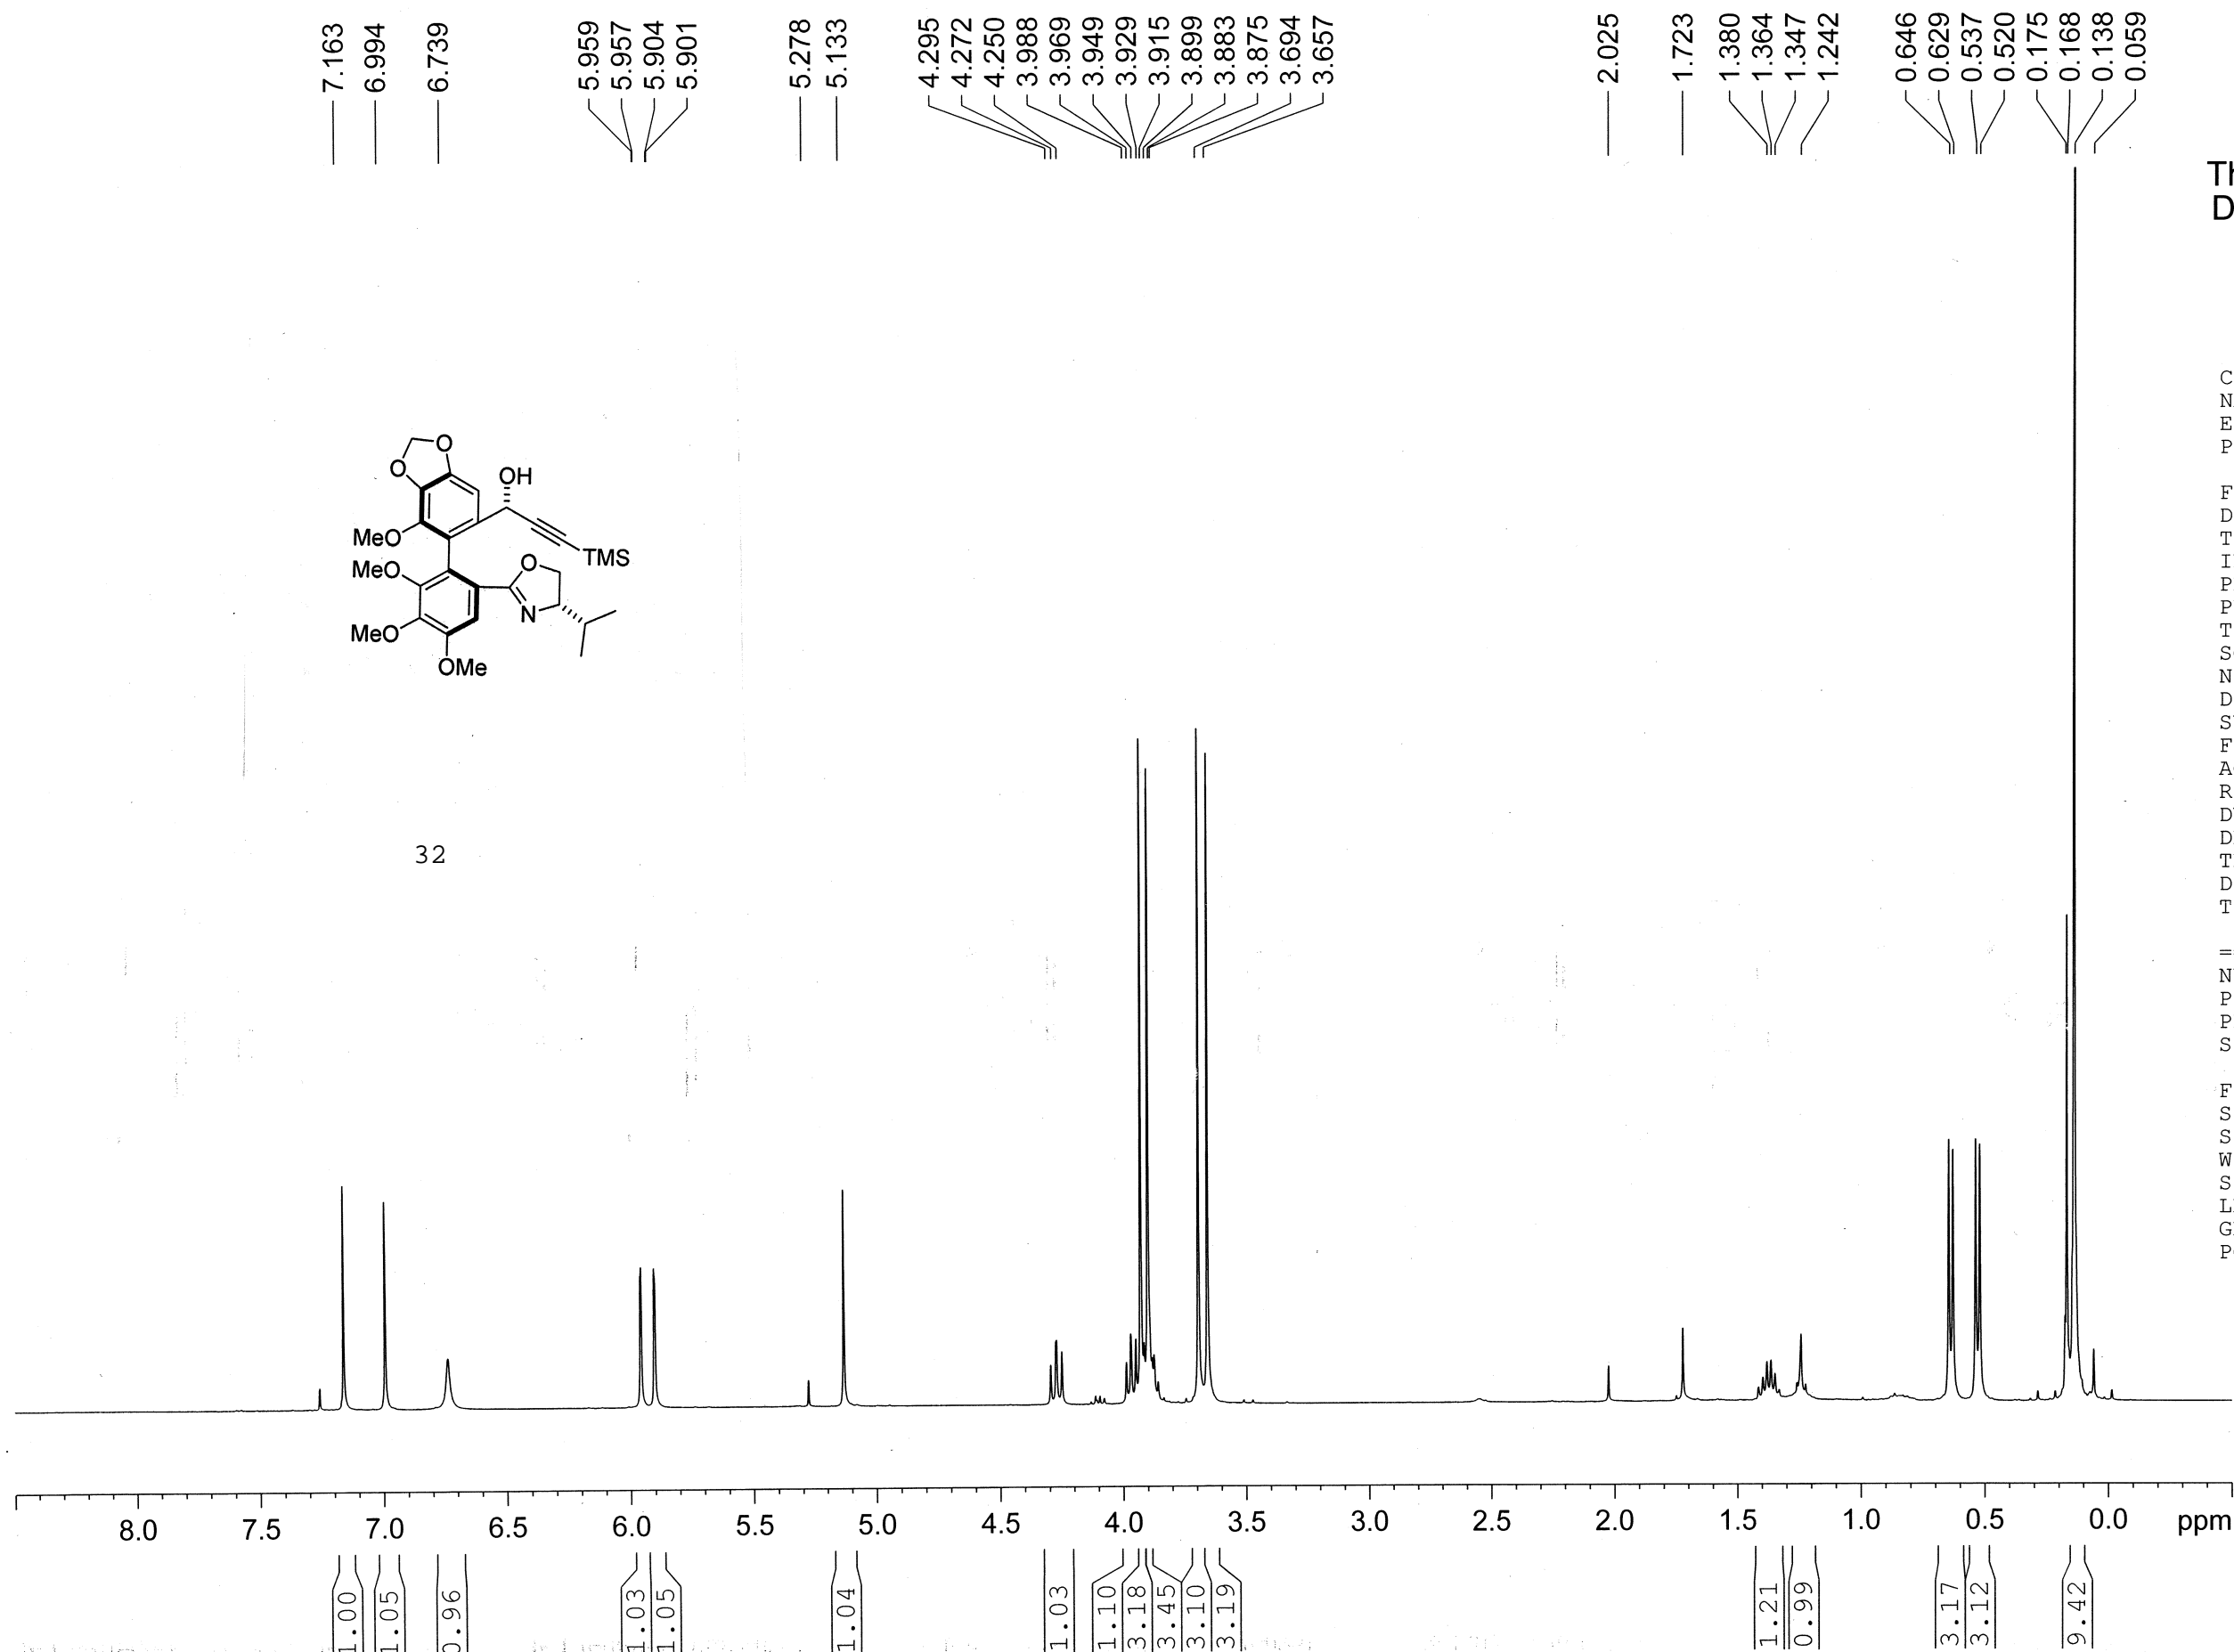

# The Ohio State University Department of Chemistry NMR Facility

Current Data Parameters  
NAME Wgong-III-229  
EXPNO 479  
PROCNO 1

F2 - Acquisition Parameters  
Date\_ 20110506  
Time\_ 12.06  
INSTRUM spect  
PROBHD 5 mm QNP 1H/13  
PULPROG zg30  
TD 65536  
SOLVENT CDCl3  
NS 16  
DS 2  
SWH 8278.146 Hz  
FIDRES 0.126314 Hz  
AQ 3.9584243 sec  
RG 57  
DW 60.400 usec  
DE 6.00 usec  
TE 300.2 K  
D1 1.00000000 sec  
TD0 1

===== CHANNEL f1 =====  
NUC1 1H  
P1 14.50 usec  
PL1 0.00 dB  
SFO1 400.1324710 MHz

F2 - Processing parameters  
SI 32768  
SF 400.1300099 MHz  
WDW EM  
SSB 0  
LB 0.30 Hz  
GB 0  
PC 1.00

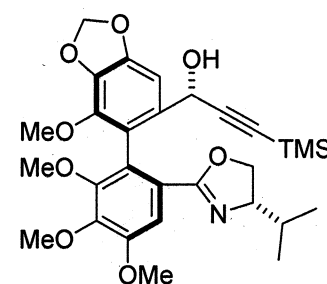

32

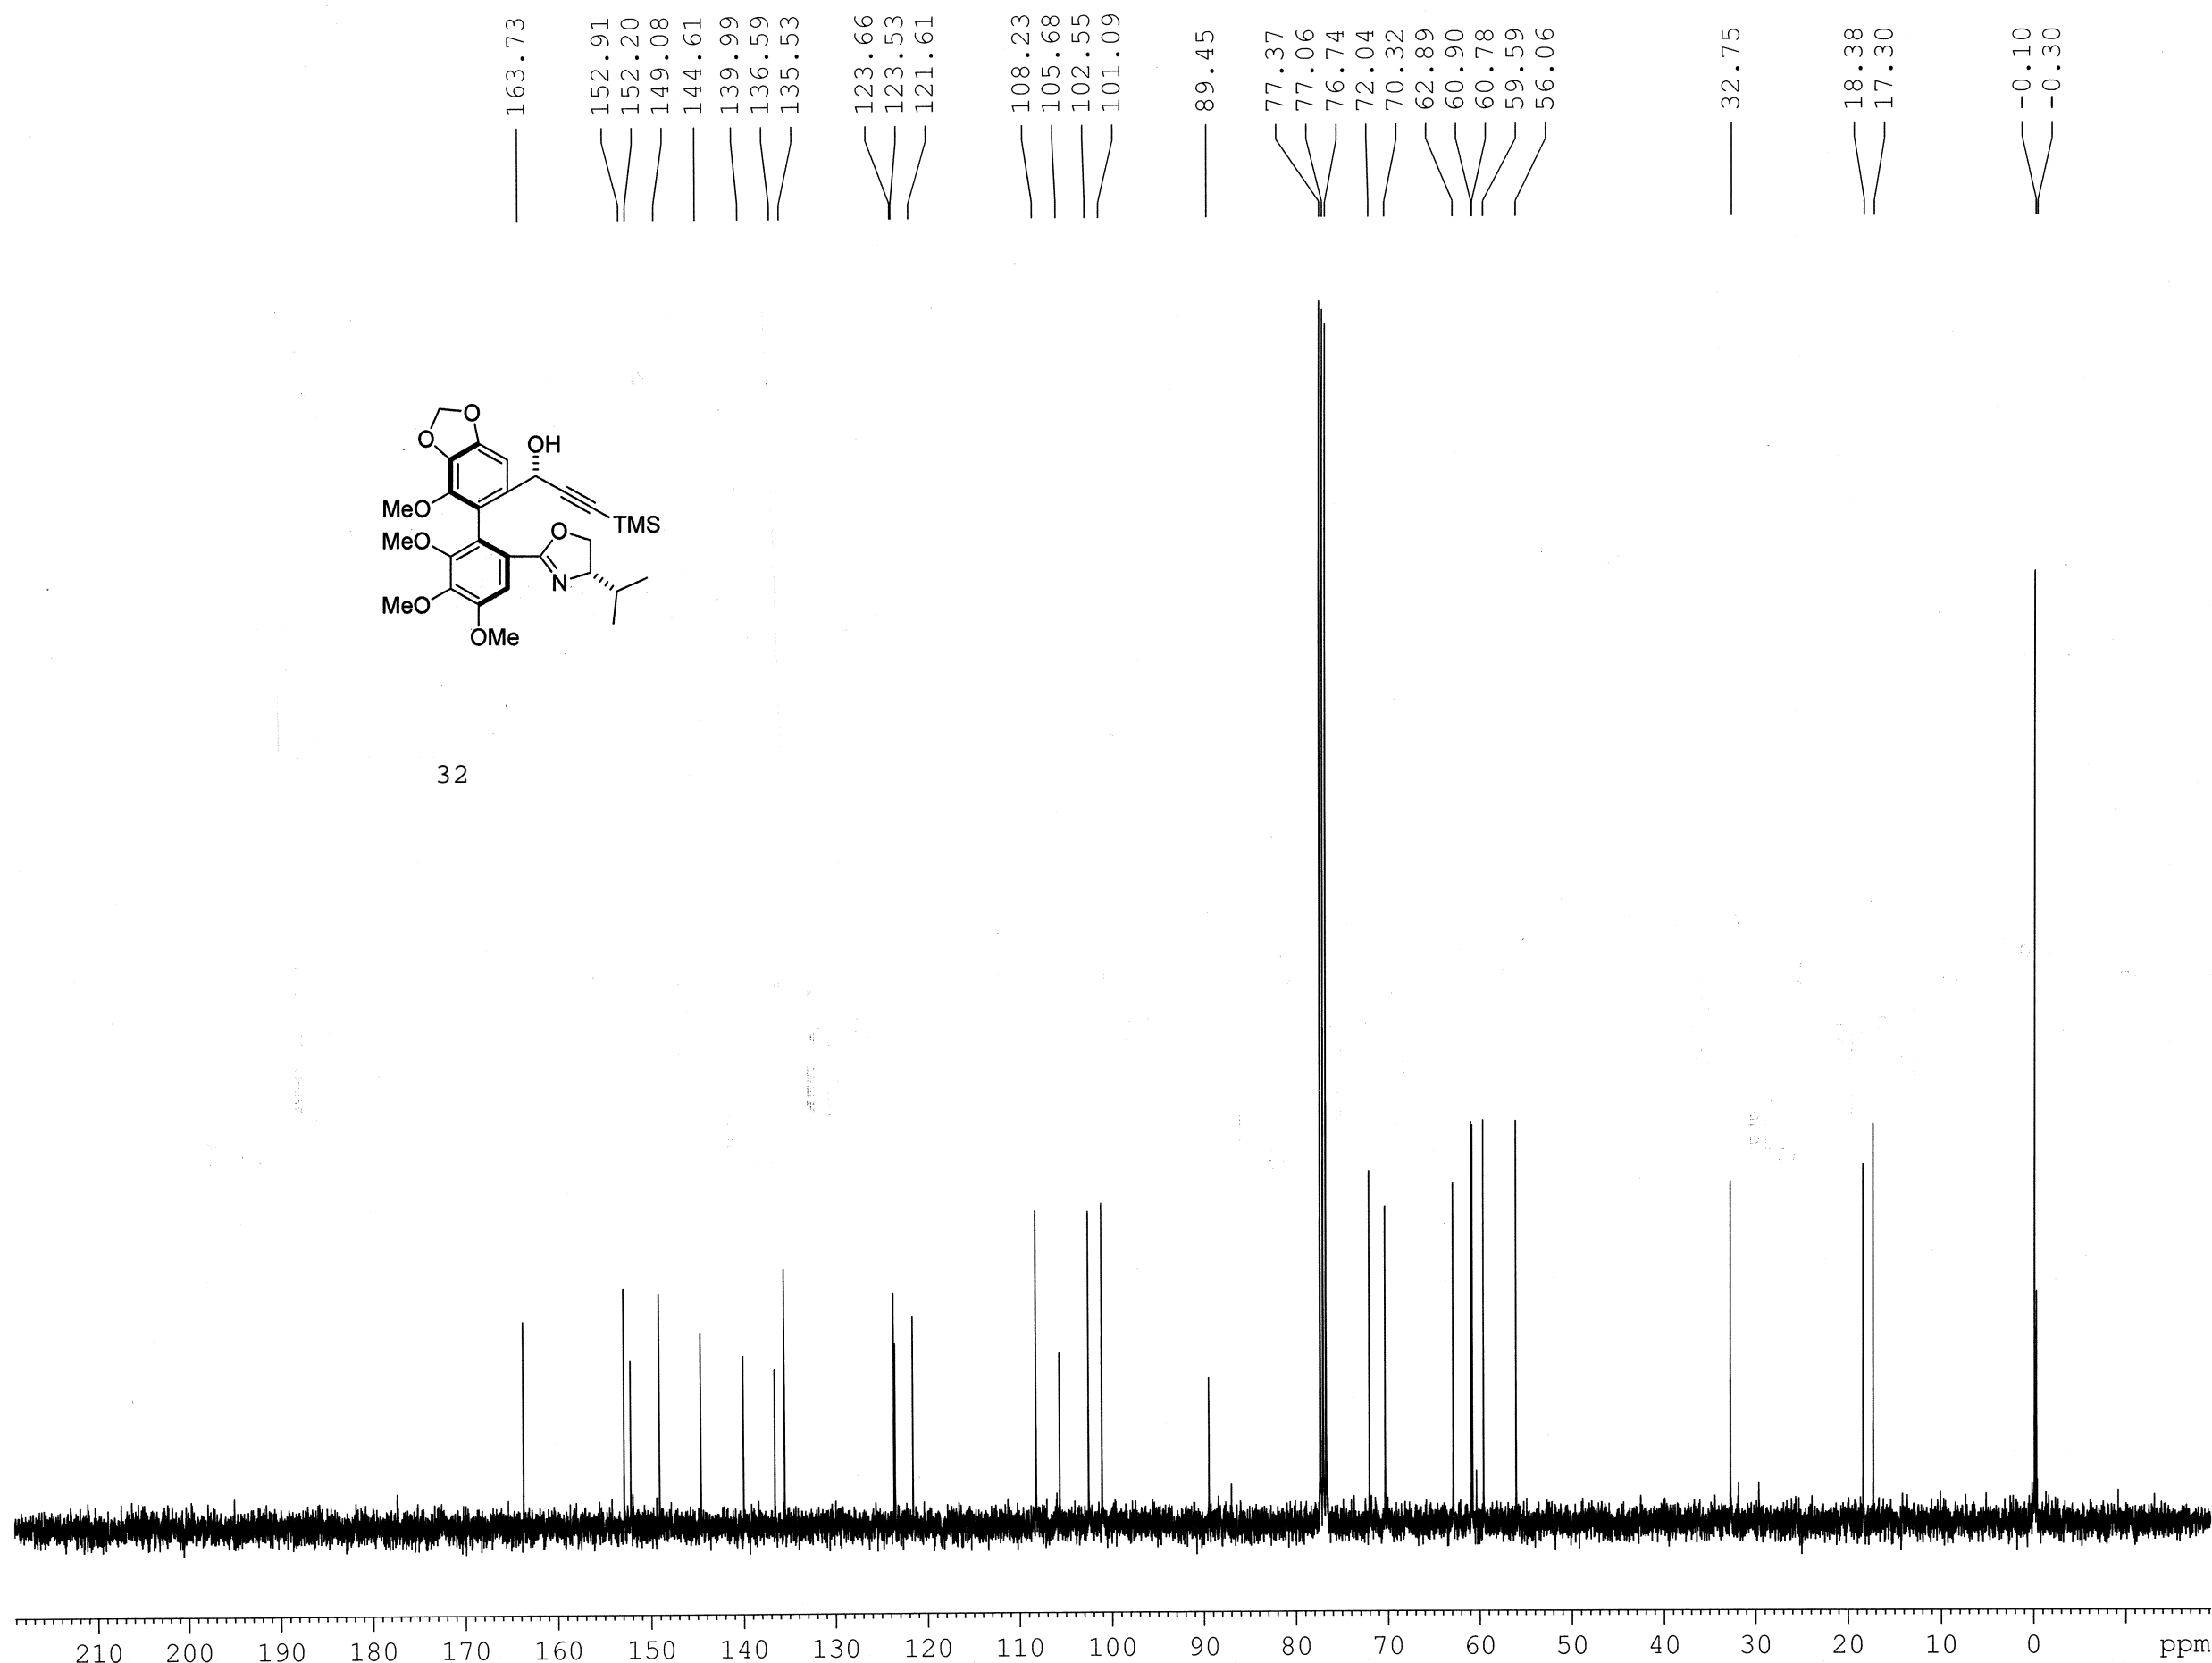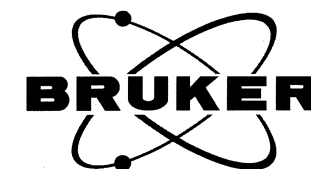

Current Data Parameters  
NAME Wgong-III-229 C13  
EXPNO 480  
PROCNO 1

F2 - Acquisition Parameters  
Date\_ 20110506  
Time\_ 12.14  
INSTRUM spect  
PROBHD 5 mm QNP 1H/13  
PULPROG zgpg30  
TD 65536  
SOLVENT CDCl3  
NS 120  
DS 4  
SWH 23980.814 Hz  
FIDRES 0.365918 Hz  
AQ 1.3664756 sec  
RG 1149.4  
DW 20.850 usec  
DE 6.00 usec  
TE 300.2 K  
D1 2.00000000 sec  
d11 0.03000000 sec  
DELTA 1.89999998 sec  
TD0 1

===== CHANNEL f1 =====  
NUC1 13C  
P1 10.50 usec  
PL1 0.00 dB  
SFO1 100.6228298 MHz

===== CHANNEL f2 =====  
CPDPRG2 waltz16  
NUC2 1H  
PCPD2 80.00 usec  
PL2 -6.00 dB  
PL12 14.56 dB  
PL13 16.50 dB  
SFO2 400.1316005 MHz

F2 - Processing parameters  
SI 32768  
SF 100.6127690 MHz  
WDW EM  
SSB 0  
LB 1.00 Hz  
GB 0  
PC 1.40

7.260  
7.194  
7.035

5.969  
5.966  
5.959  
5.955  
5.283  
5.075  
4.165  
4.145  
4.142  
4.122  
3.940  
3.937  
3.924  
3.919  
3.907  
3.901  
3.895  
3.884  
3.859  
3.852  
3.836  
3.809  
3.789  
3.779  
3.769  
3.755  
3.703  
3.689  
3.651  
3.641  
3.629

2.028  
1.558  
1.541  
1.343  
1.329  
1.244  
1.239  
1.220  
0.761  
0.759  
0.744  
0.742  
0.141  
0.136  
0.129  
0.121  
0.113

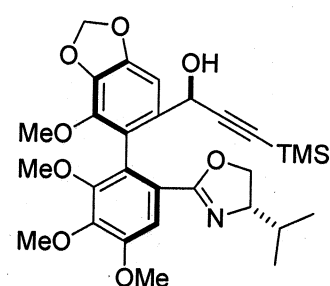

33

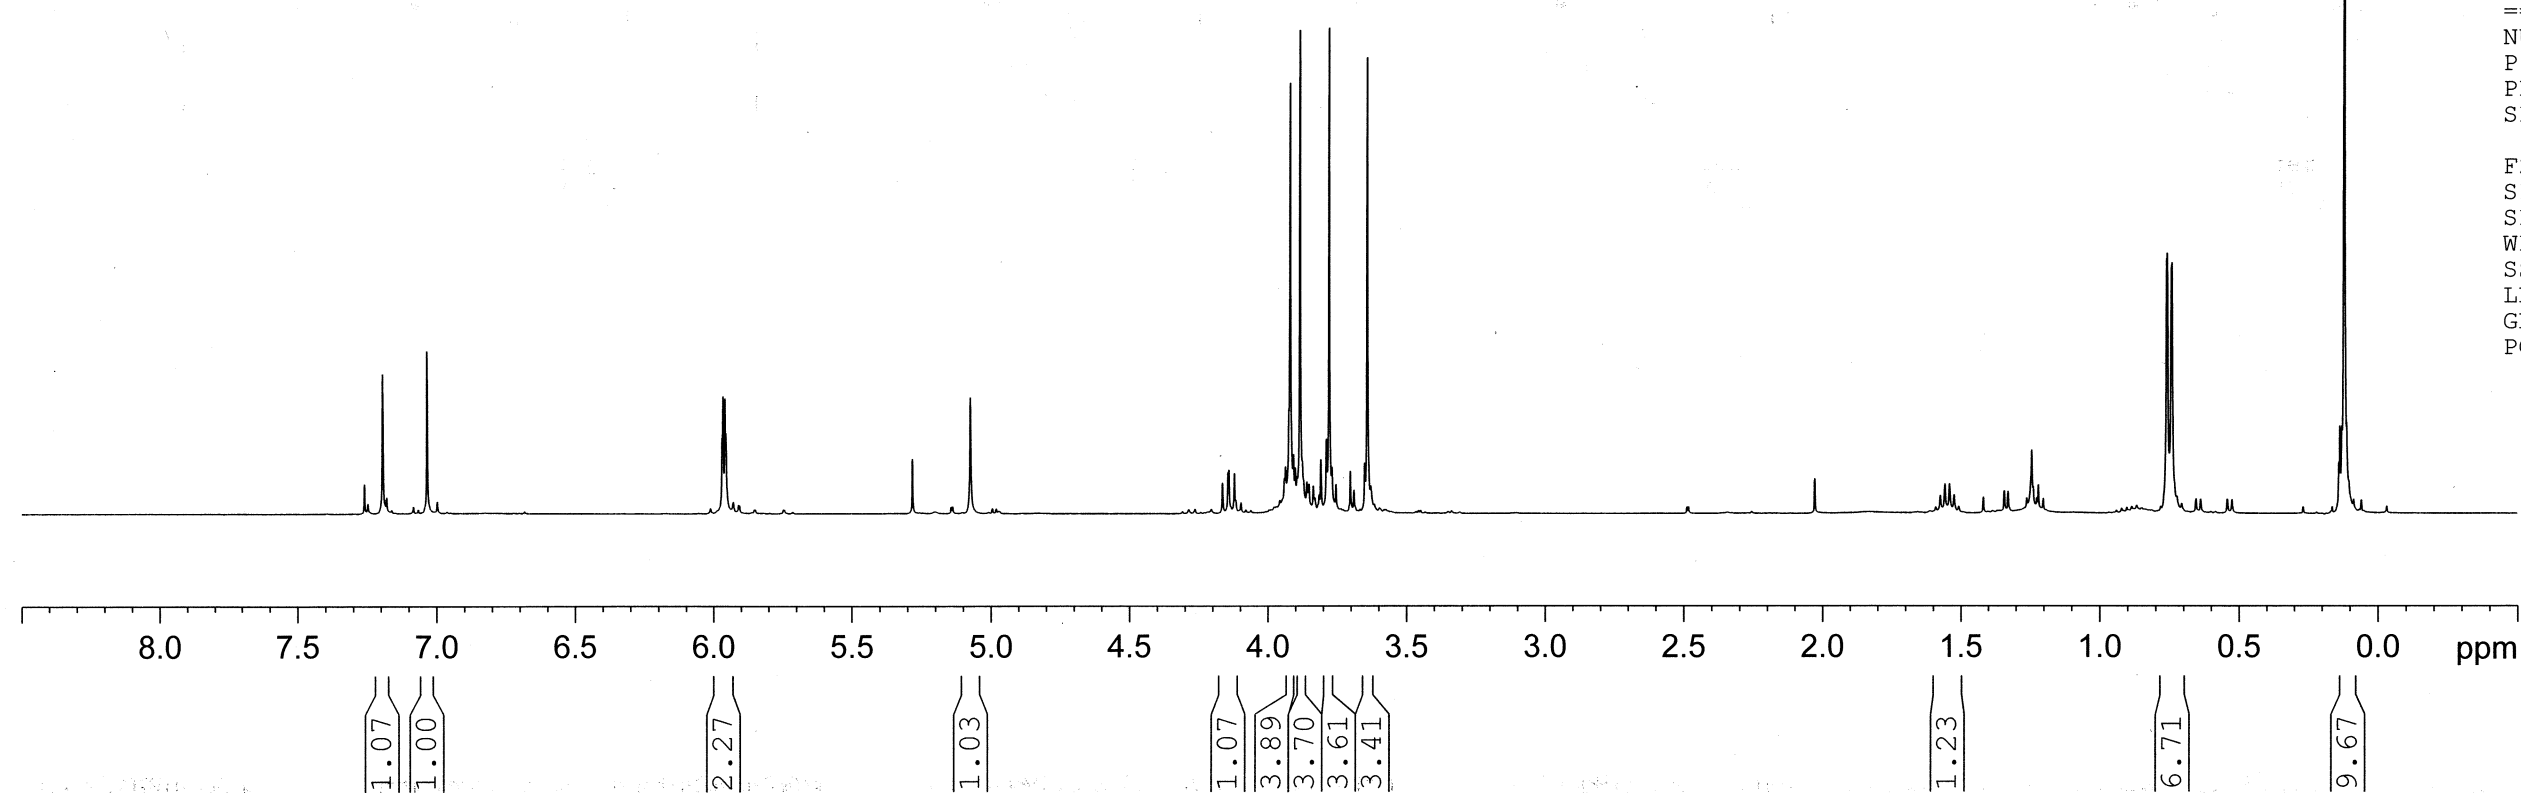

The Ohio State University  
Department of Chemistry  
NMR Facility

Current Data Parameters  
NAME Wgong-III-240-2 p  
EXPNO 530  
PROCNO 1

F2 - Acquisition Parameters  
Date\_ 20110524  
Time 14.39  
INSTRUM spect  
PROBHD 5 mm QNP 1H/13  
PULPROG zg30  
TD 65536  
SOLVENT CDCl3  
NS 16  
DS 2  
SWH 8278.146 Hz  
FIDRES 0.126314 Hz  
AQ 3.9584243 sec  
RG 64  
DW 60.400 usec  
DE 6.00 usec  
TE 300.2 K  
D1 1.00000000 sec  
TD0 1

===== CHANNEL f1 =====  
NUC1 1H  
P1 14.50 usec  
PL1 0.00 dB  
SFO1 400.1324710 MHz

F2 - Processing parameters  
SI 32768  
SF 400.1300095 MHz  
WDW EM  
SSB 0  
LB 0.30 Hz  
GB 0  
PC 1.00

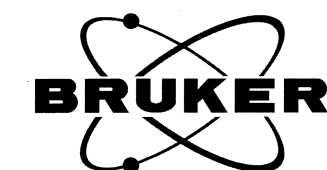

Current Data Parameters  
NAME Wgong-III-240-2 p C13  
EXPNO 531  
PROCNO 1

F2 - Acquisition Parameters  
Date\_ 20110524  
Time\_ 14.47  
INSTRUM spect  
PROBHD 5 mm QNP 1H/13  
PULPROG zgpg30  
TD 65536  
SOLVENT CDC13  
NS 337  
DS 4  
SWH 23980.814 Hz  
FIDRES 0.365918 Hz  
AQ 1.3664756 sec  
RG 1625.5  
DW 20.850 usec  
DE 6.00 usec  
TE 300.2 K  
D1 2.00000000 sec  
d11 0.03000000 sec  
DELTA 1.89999998 sec  
TD0 1

===== CHANNEL f1 =====  
NUC1 13C  
P1 10.50 usec  
PL1 0.00 dB  
SFO1 100.6228298 MHz

===== CHANNEL f2 =====  
CPDPRG2 waltz16  
NUC2 1H  
PCPD2 80.00 usec  
PL2 -6.00 dB  
PL12 14.56 dB  
PL13 16.50 dB  
SFO2 400.1316005 MHz

F2 - Processing parameters  
SI 32768  
SF 100.6127690 MHz  
WDW EM  
SSB 0  
LB 1.00 Hz  
GB 0  
PC 1.40

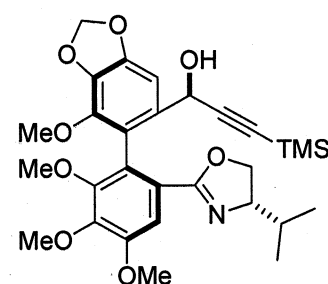

33

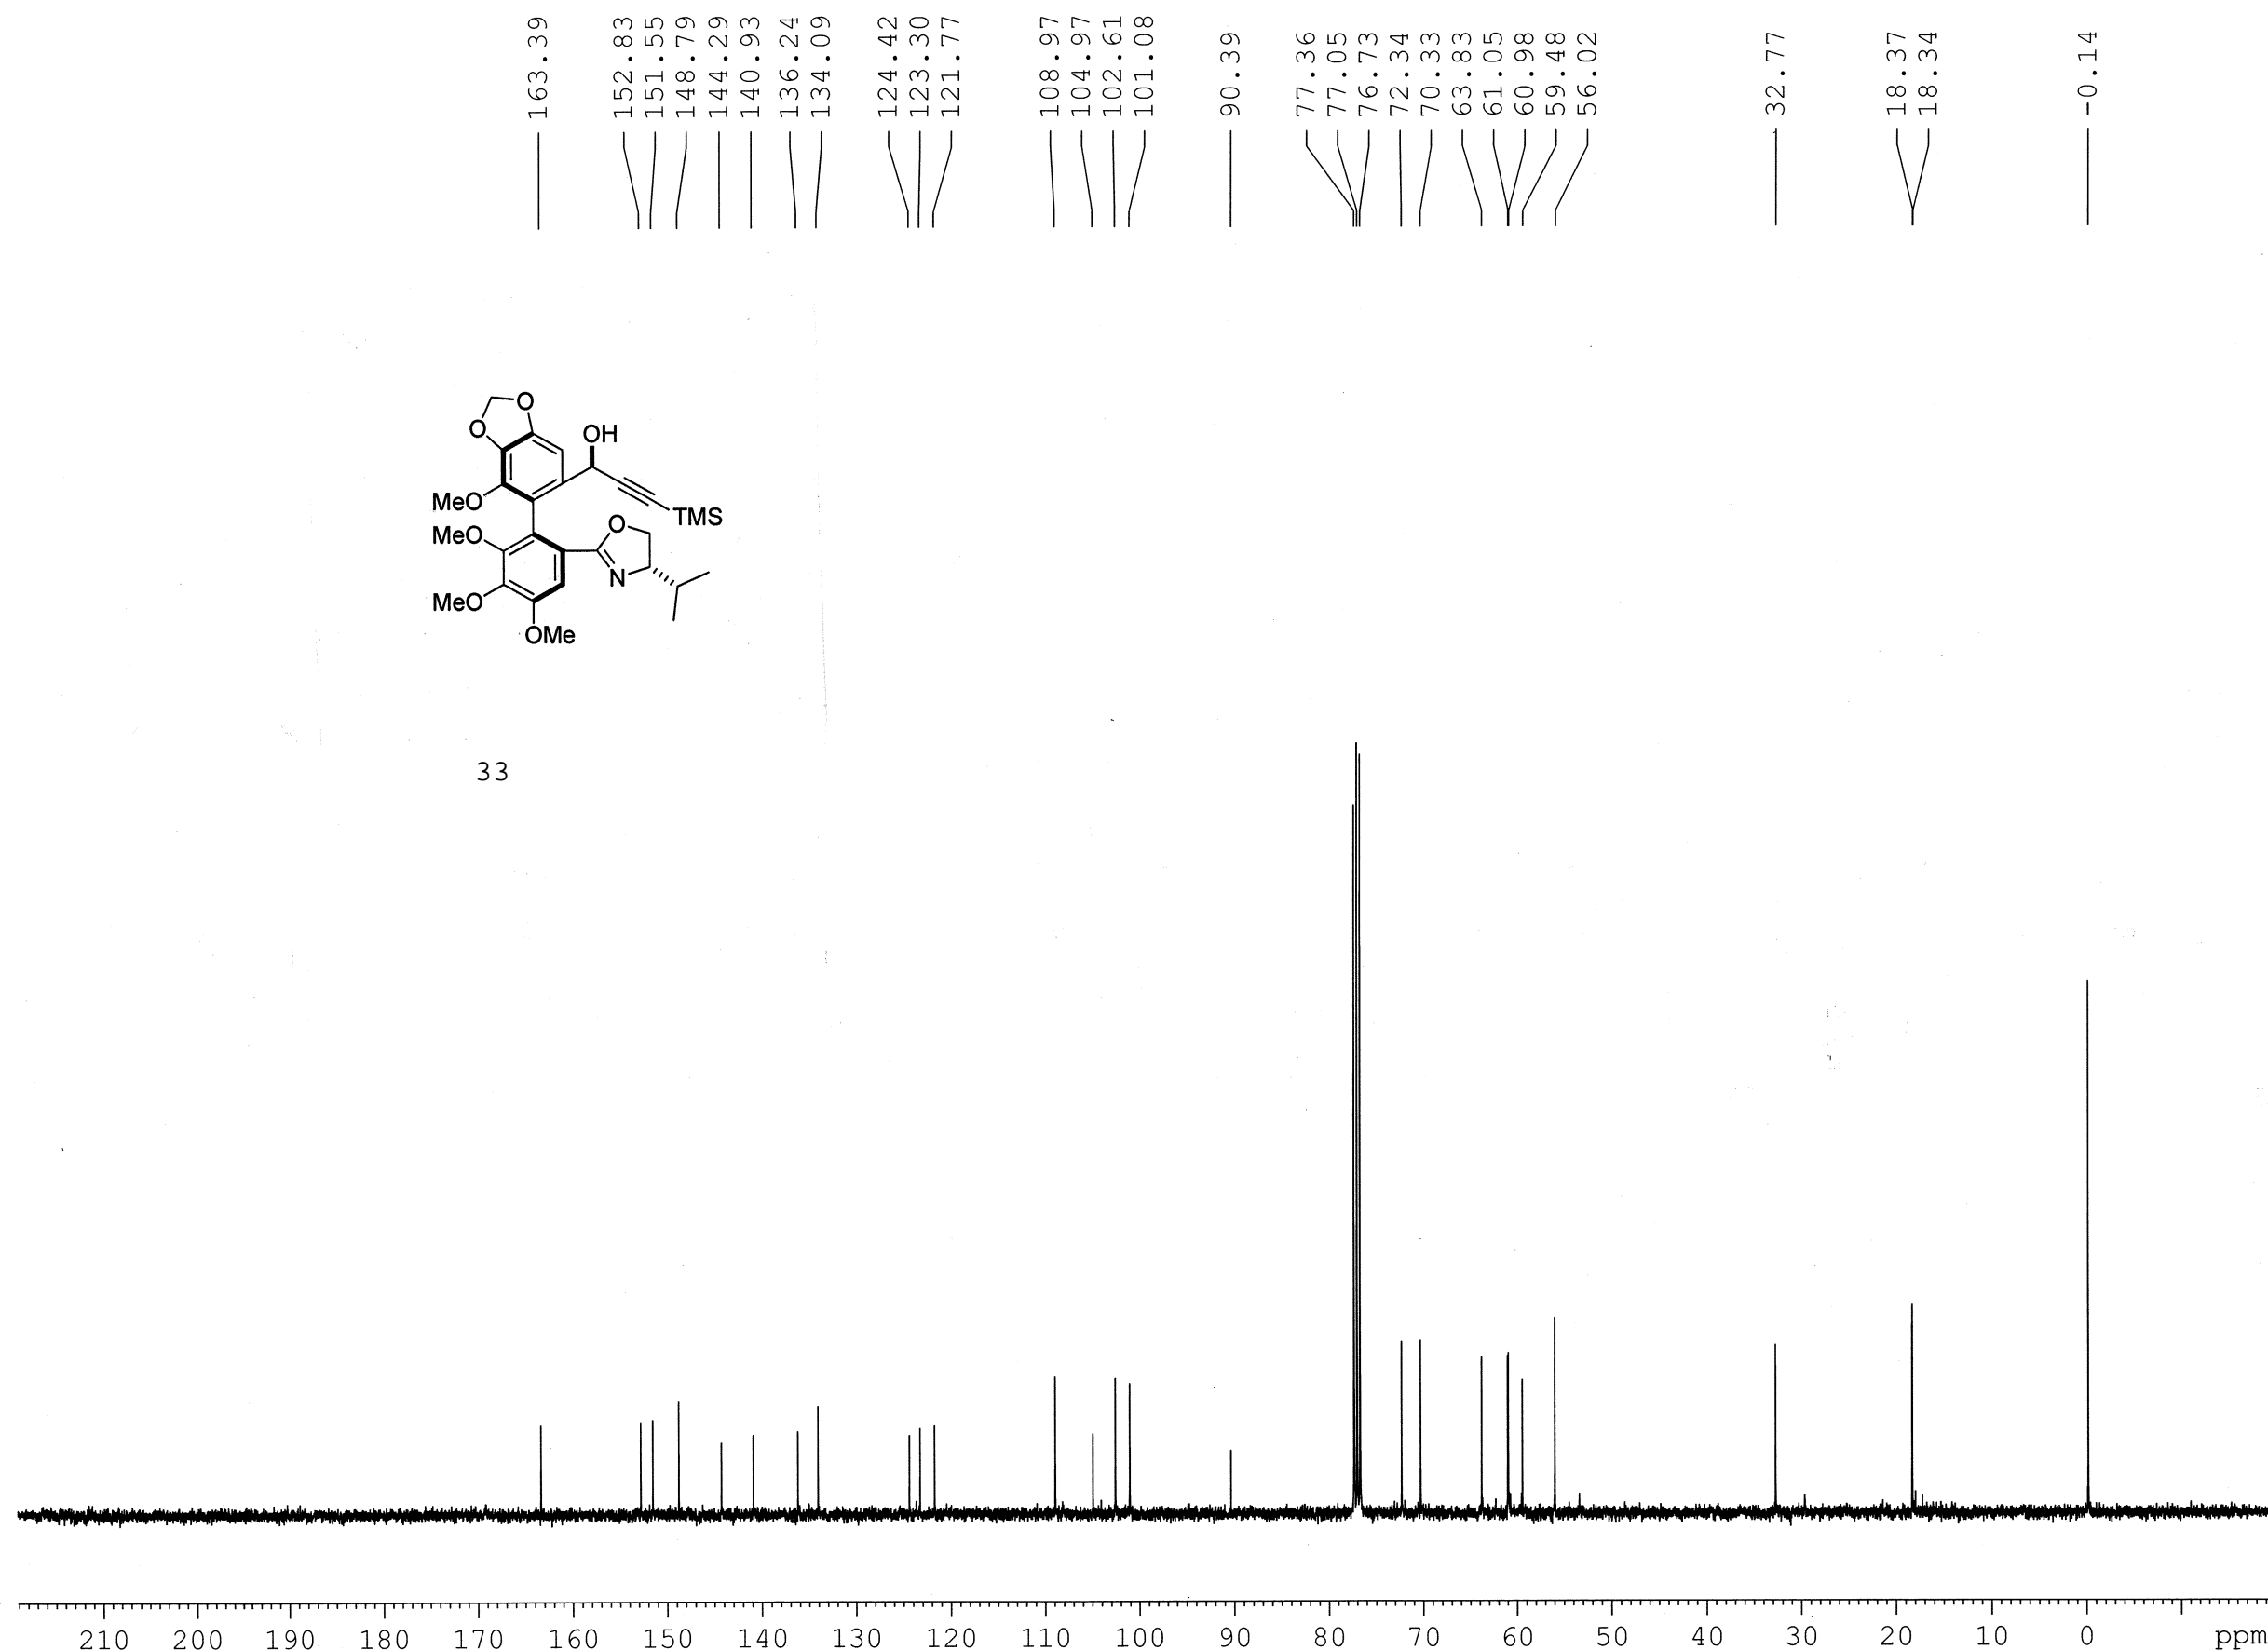



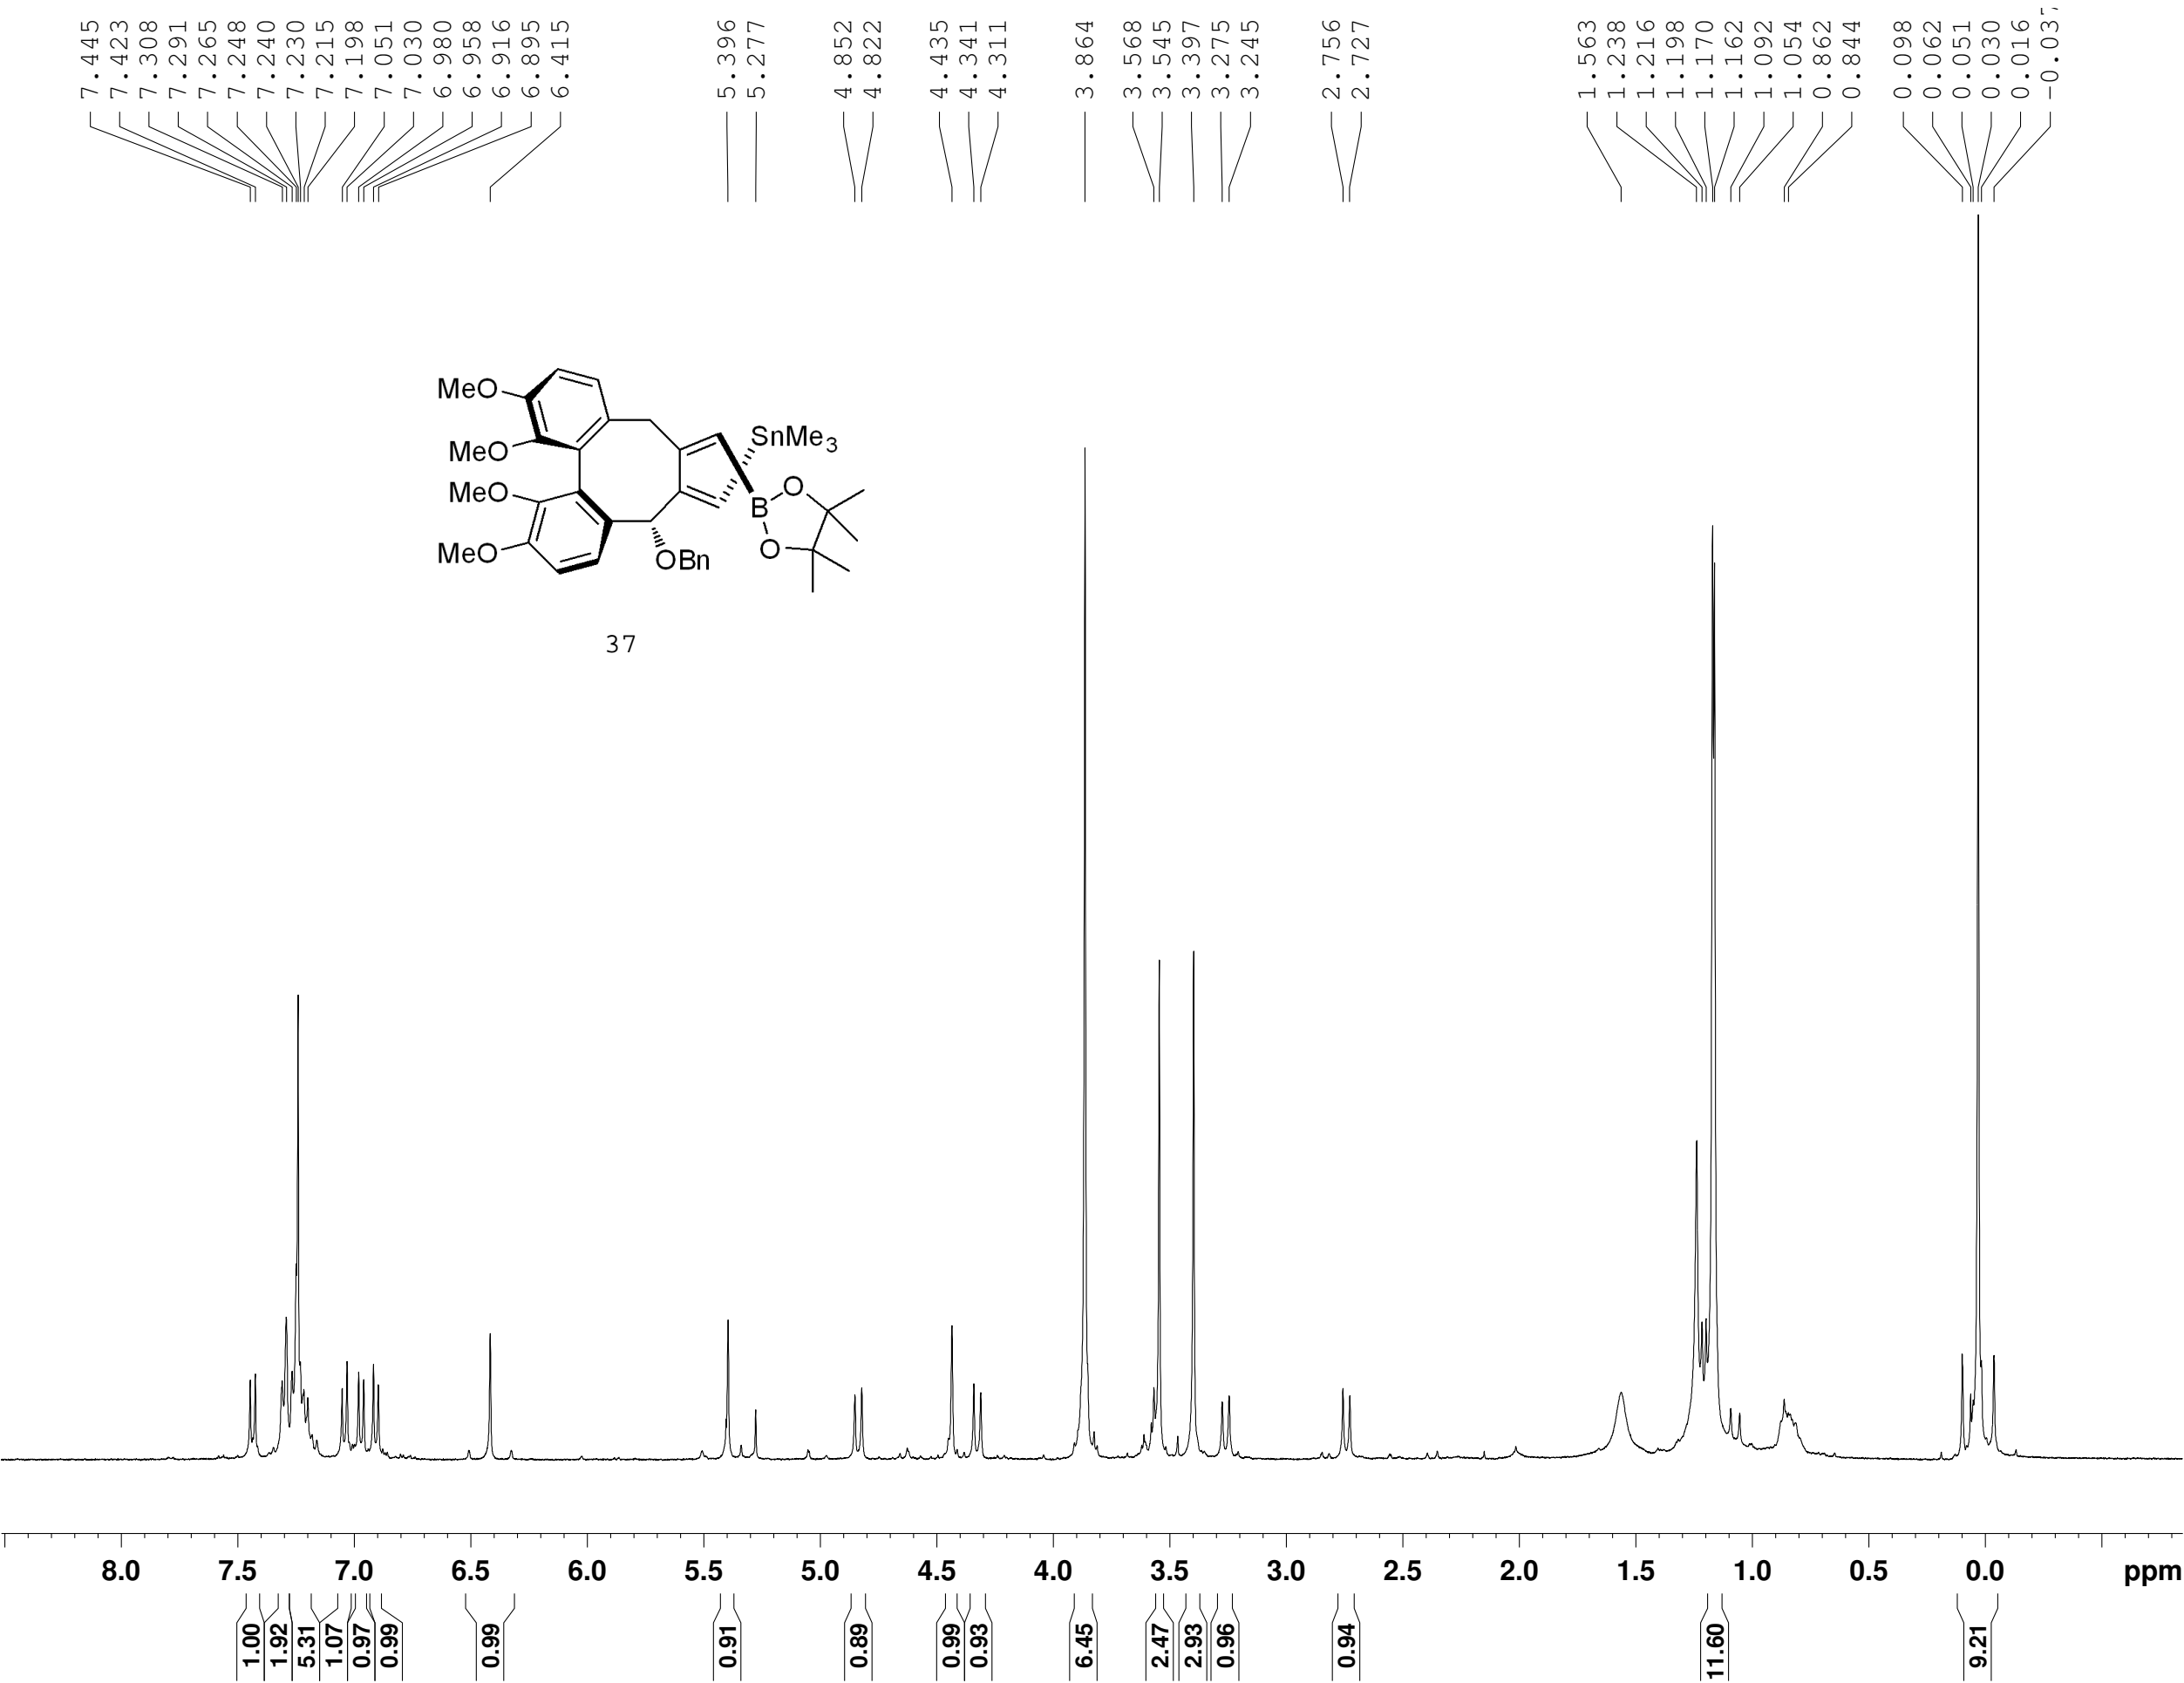

The Ohio State University  
Department of Chemistry  
NMR Facility  
400MHz – 0083

```
Current Data Parameters
NAME      Rs-1-139-1cdcl3
EXPNO      1
PROCNO     1
```

```

F2 - Acquisition Parameters
Date_                20070713
Time                 20.24
INSTRUM              spect
PROBHD      5 mm QNP 1H/13
PULPROG              zg30
TD                   65536
SOLVENT              CDC13
NS                     16
DS                      2
SWH           8278.146 Hz
FIDRES           0.126314 Hz
AQ           3.9584243 sec
RG             287.4
DW             60.400 use
DE             6.00 use
TE             300.2 K
D1             1.00000000 sec
MCREST         0.00000000 sec
MCWRK         0.01500000 sec

```

```
===== CHANNEL f1 =====
NUC1                      1H
P1                        13.00 use
PL1                       0.00 dB
SFO1                     400.1324710 MHz
```

```
F2 - Processing parameters
SI                32768
SF                400.1300179 MHz
WDW               EM
SSB               0
LB                0.30 Hz
GB                0
PC                1.00
```

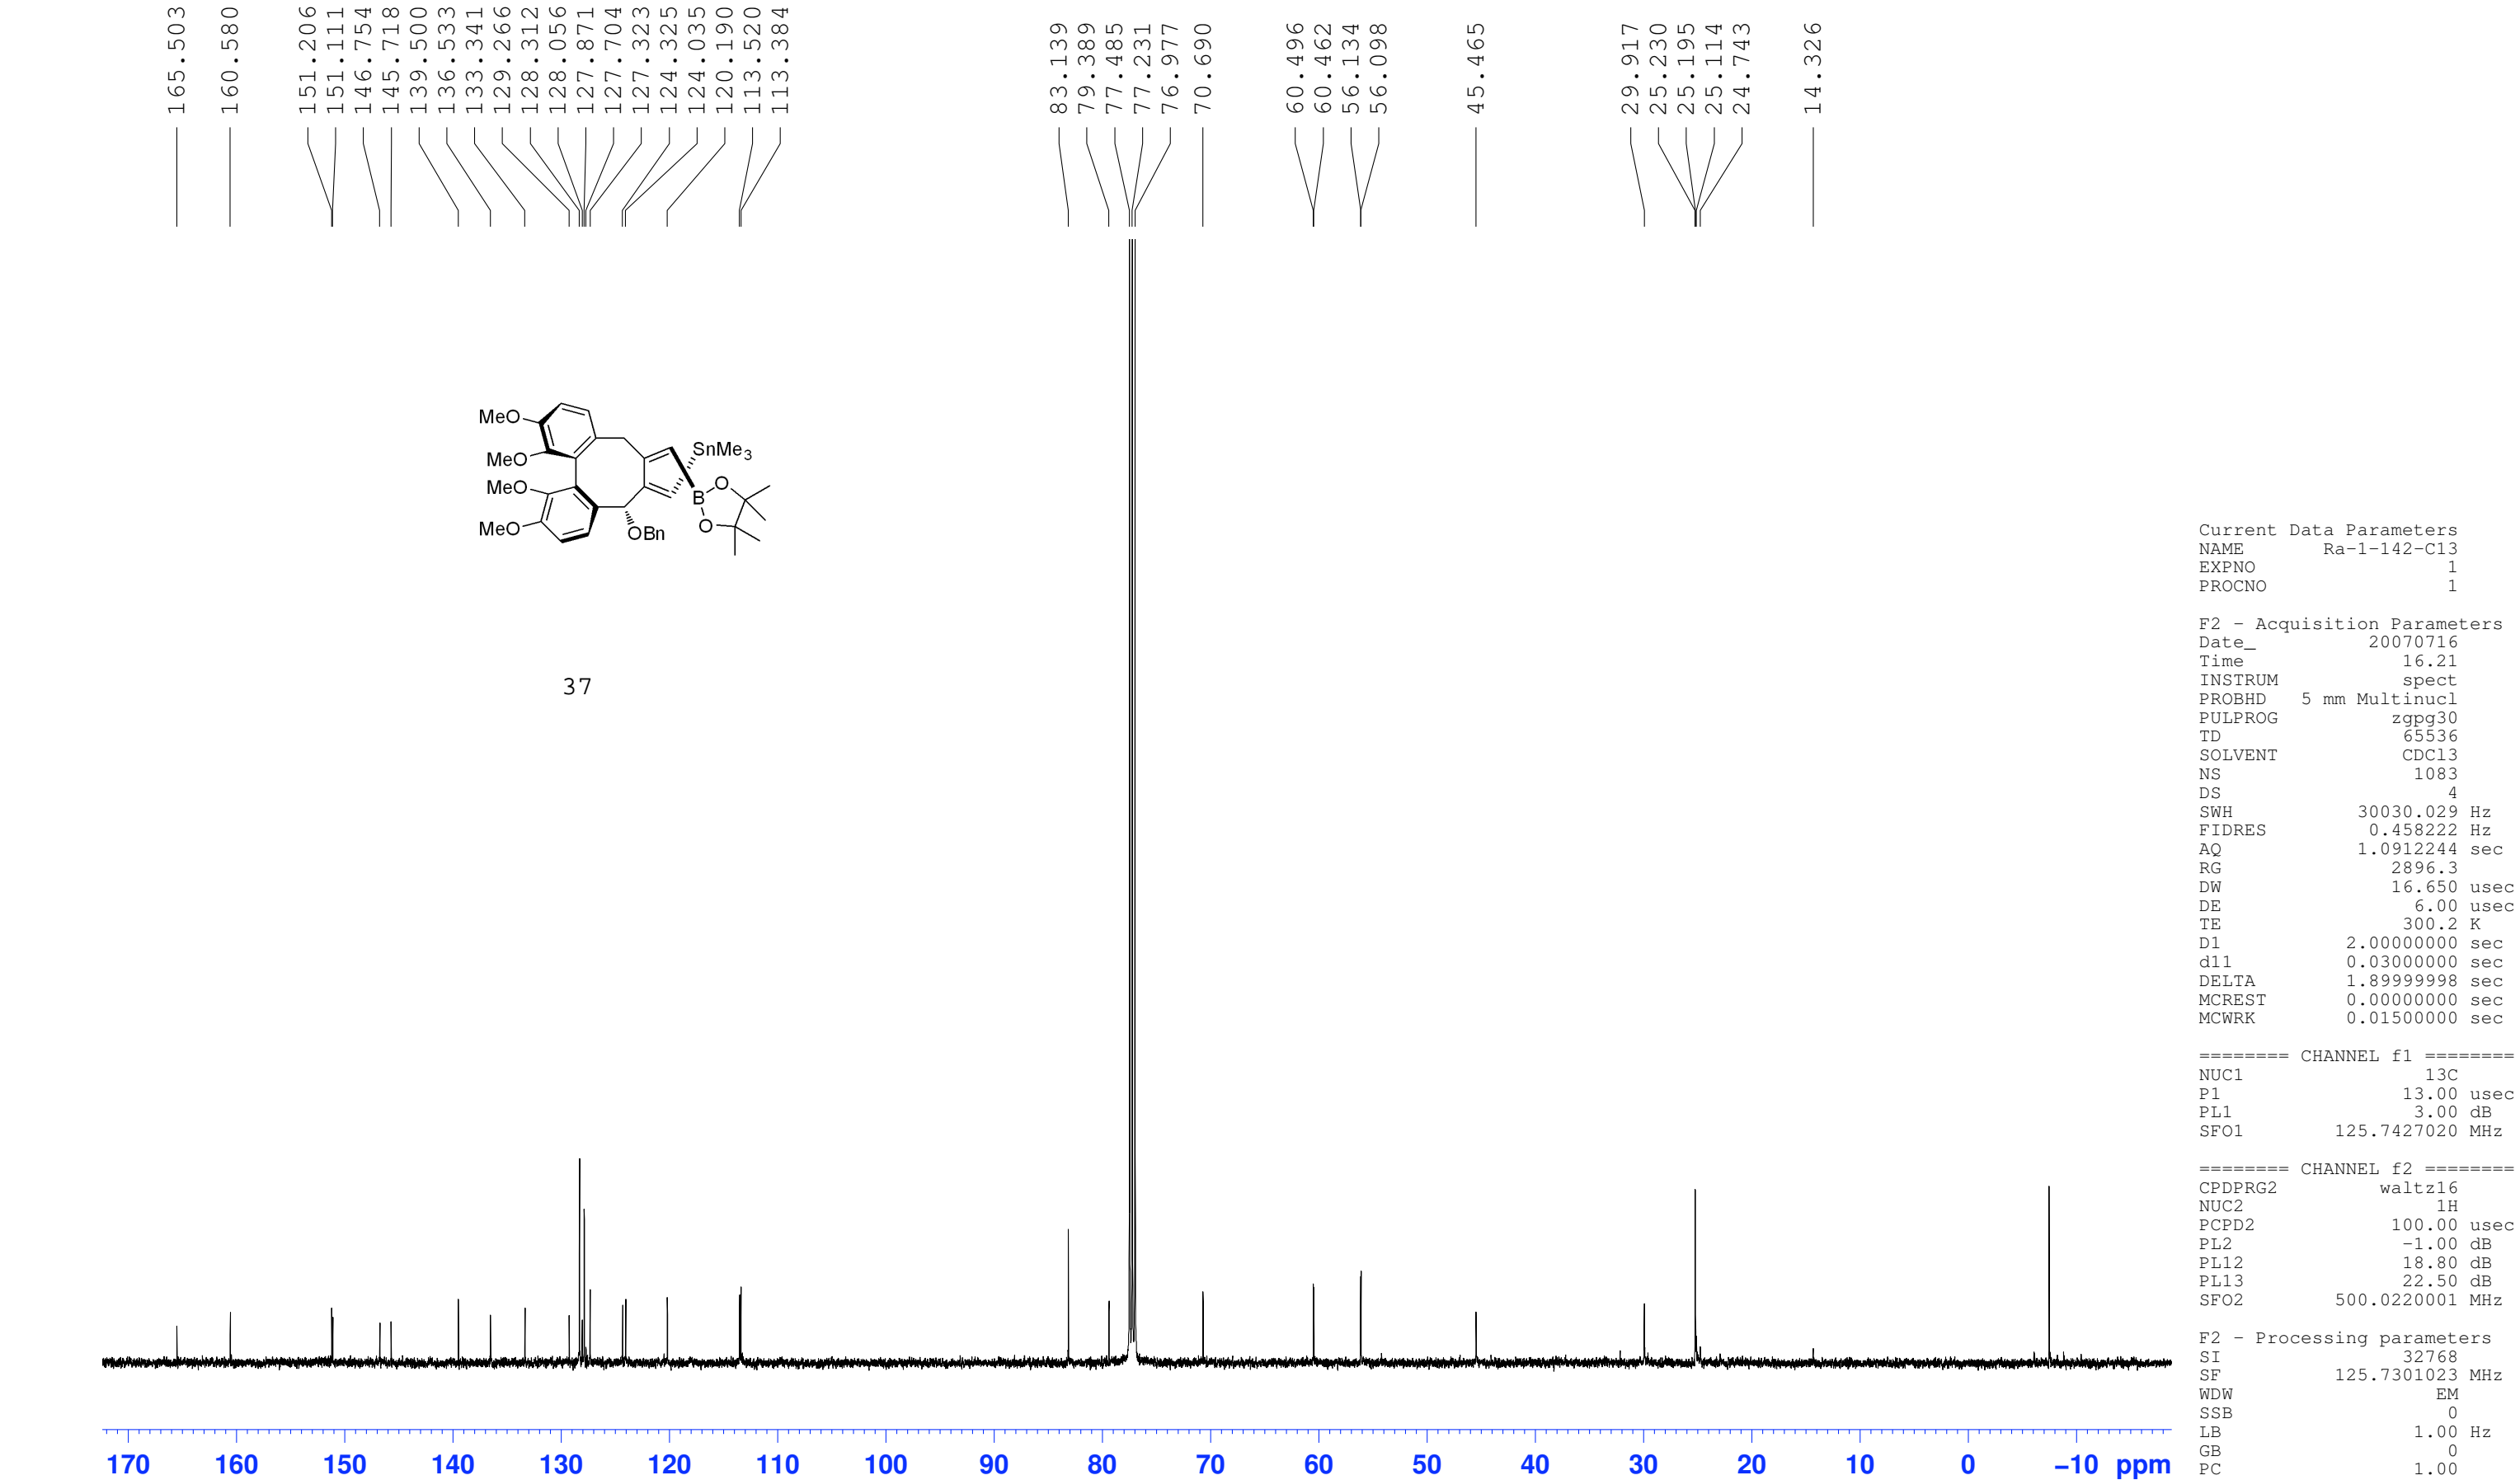

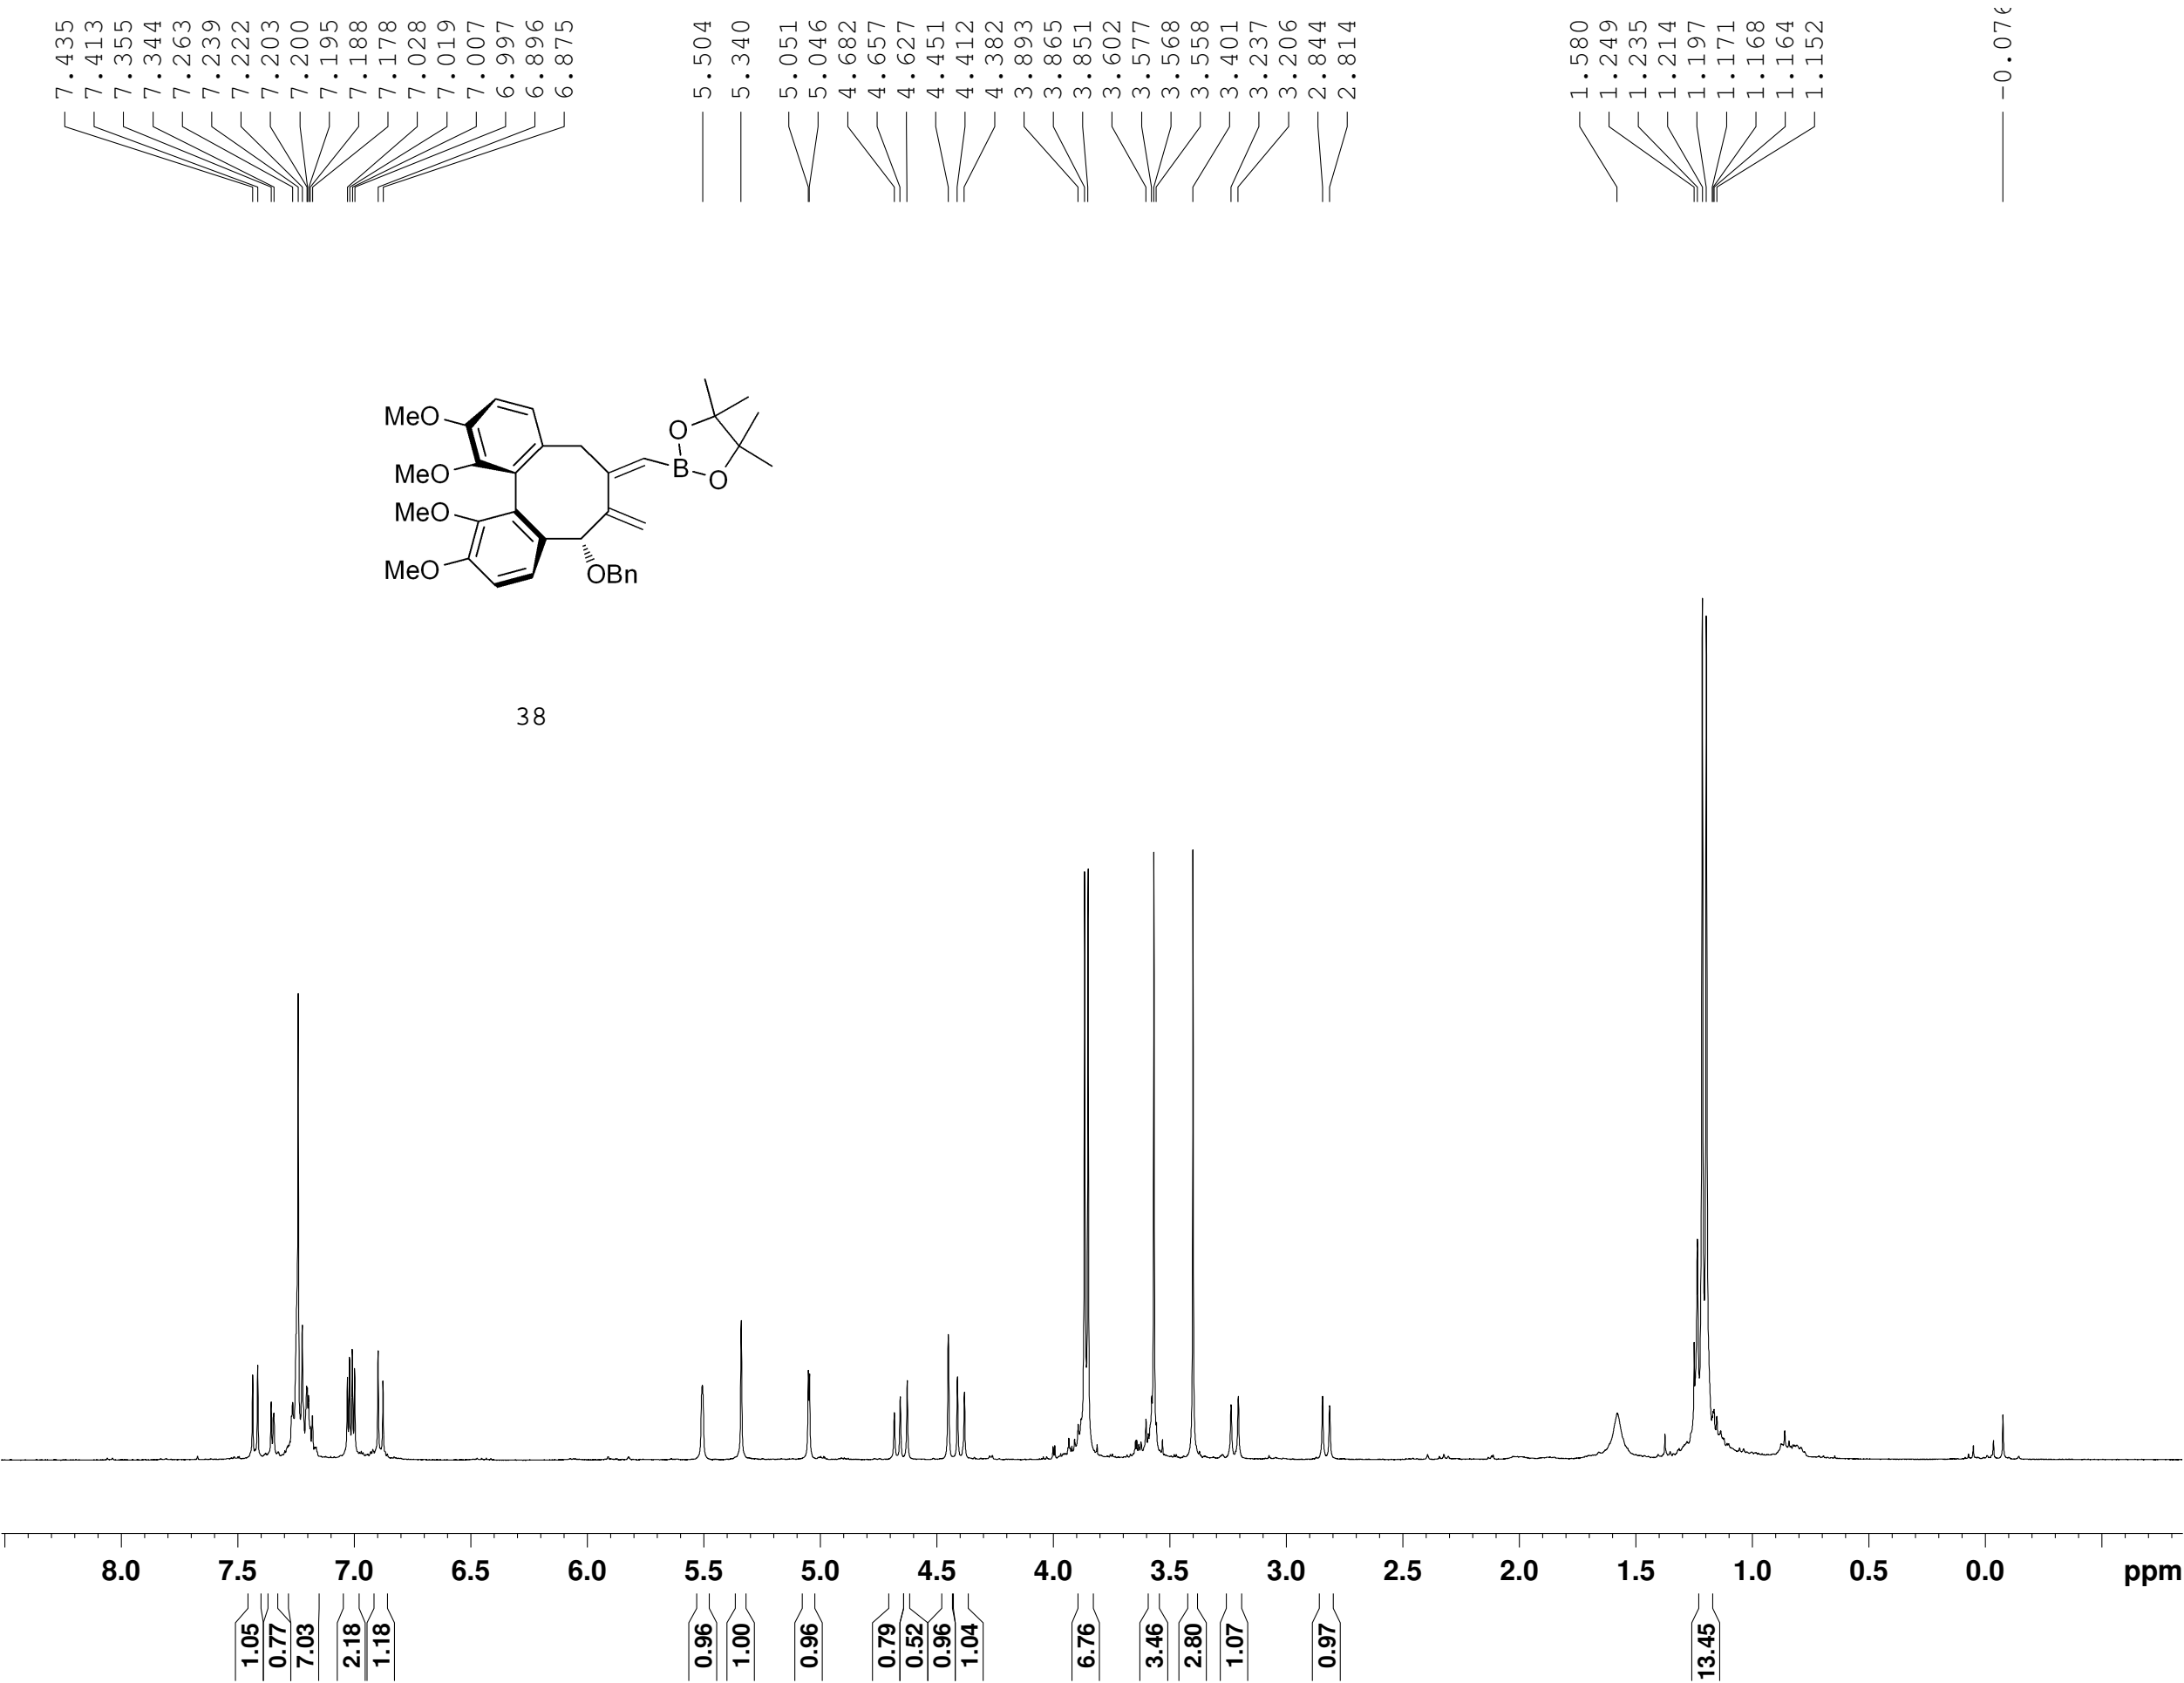

The Ohio State University  
Department of Chemistry  
NMR Facility  
400MHz – 0083

Current Data Parameters  
NAME Rs-1-256  
EXPNO 1  
PROCNO 1

F2 - Acquisition Parameters  
Date\_ 20071005  
Time 8.23  
INSTRUM spect  
PROBHD 5 mm QNP 1H/13  
PULPROG zg30  
TD 65536  
SOLVENT CDCl3  
NS 16  
DS 2  
SWH 8278.146 Hz  
FIDRES 0.126314 Hz  
AQ 3.9584243 sec  
RG 181  
DW 60.400 use  
DE 6.00 use  
TE 0.0 K  
D1 1.00000000 sec  
MCREST 0.00000000 sec  
MCWRK 0.01500000 sec

===== CHANNEL f1 =====  
NUC1 1H  
P1 13.00 use  
PL1 0.00 dB  
SFO1 400.1324710 MHz

F2 - Processing parameters  
SI 32768  
SF 400.1300181 MHz  
WDW EM  
SSB 0  
LB 0.30 Hz  
GB 0  
PC 1.00

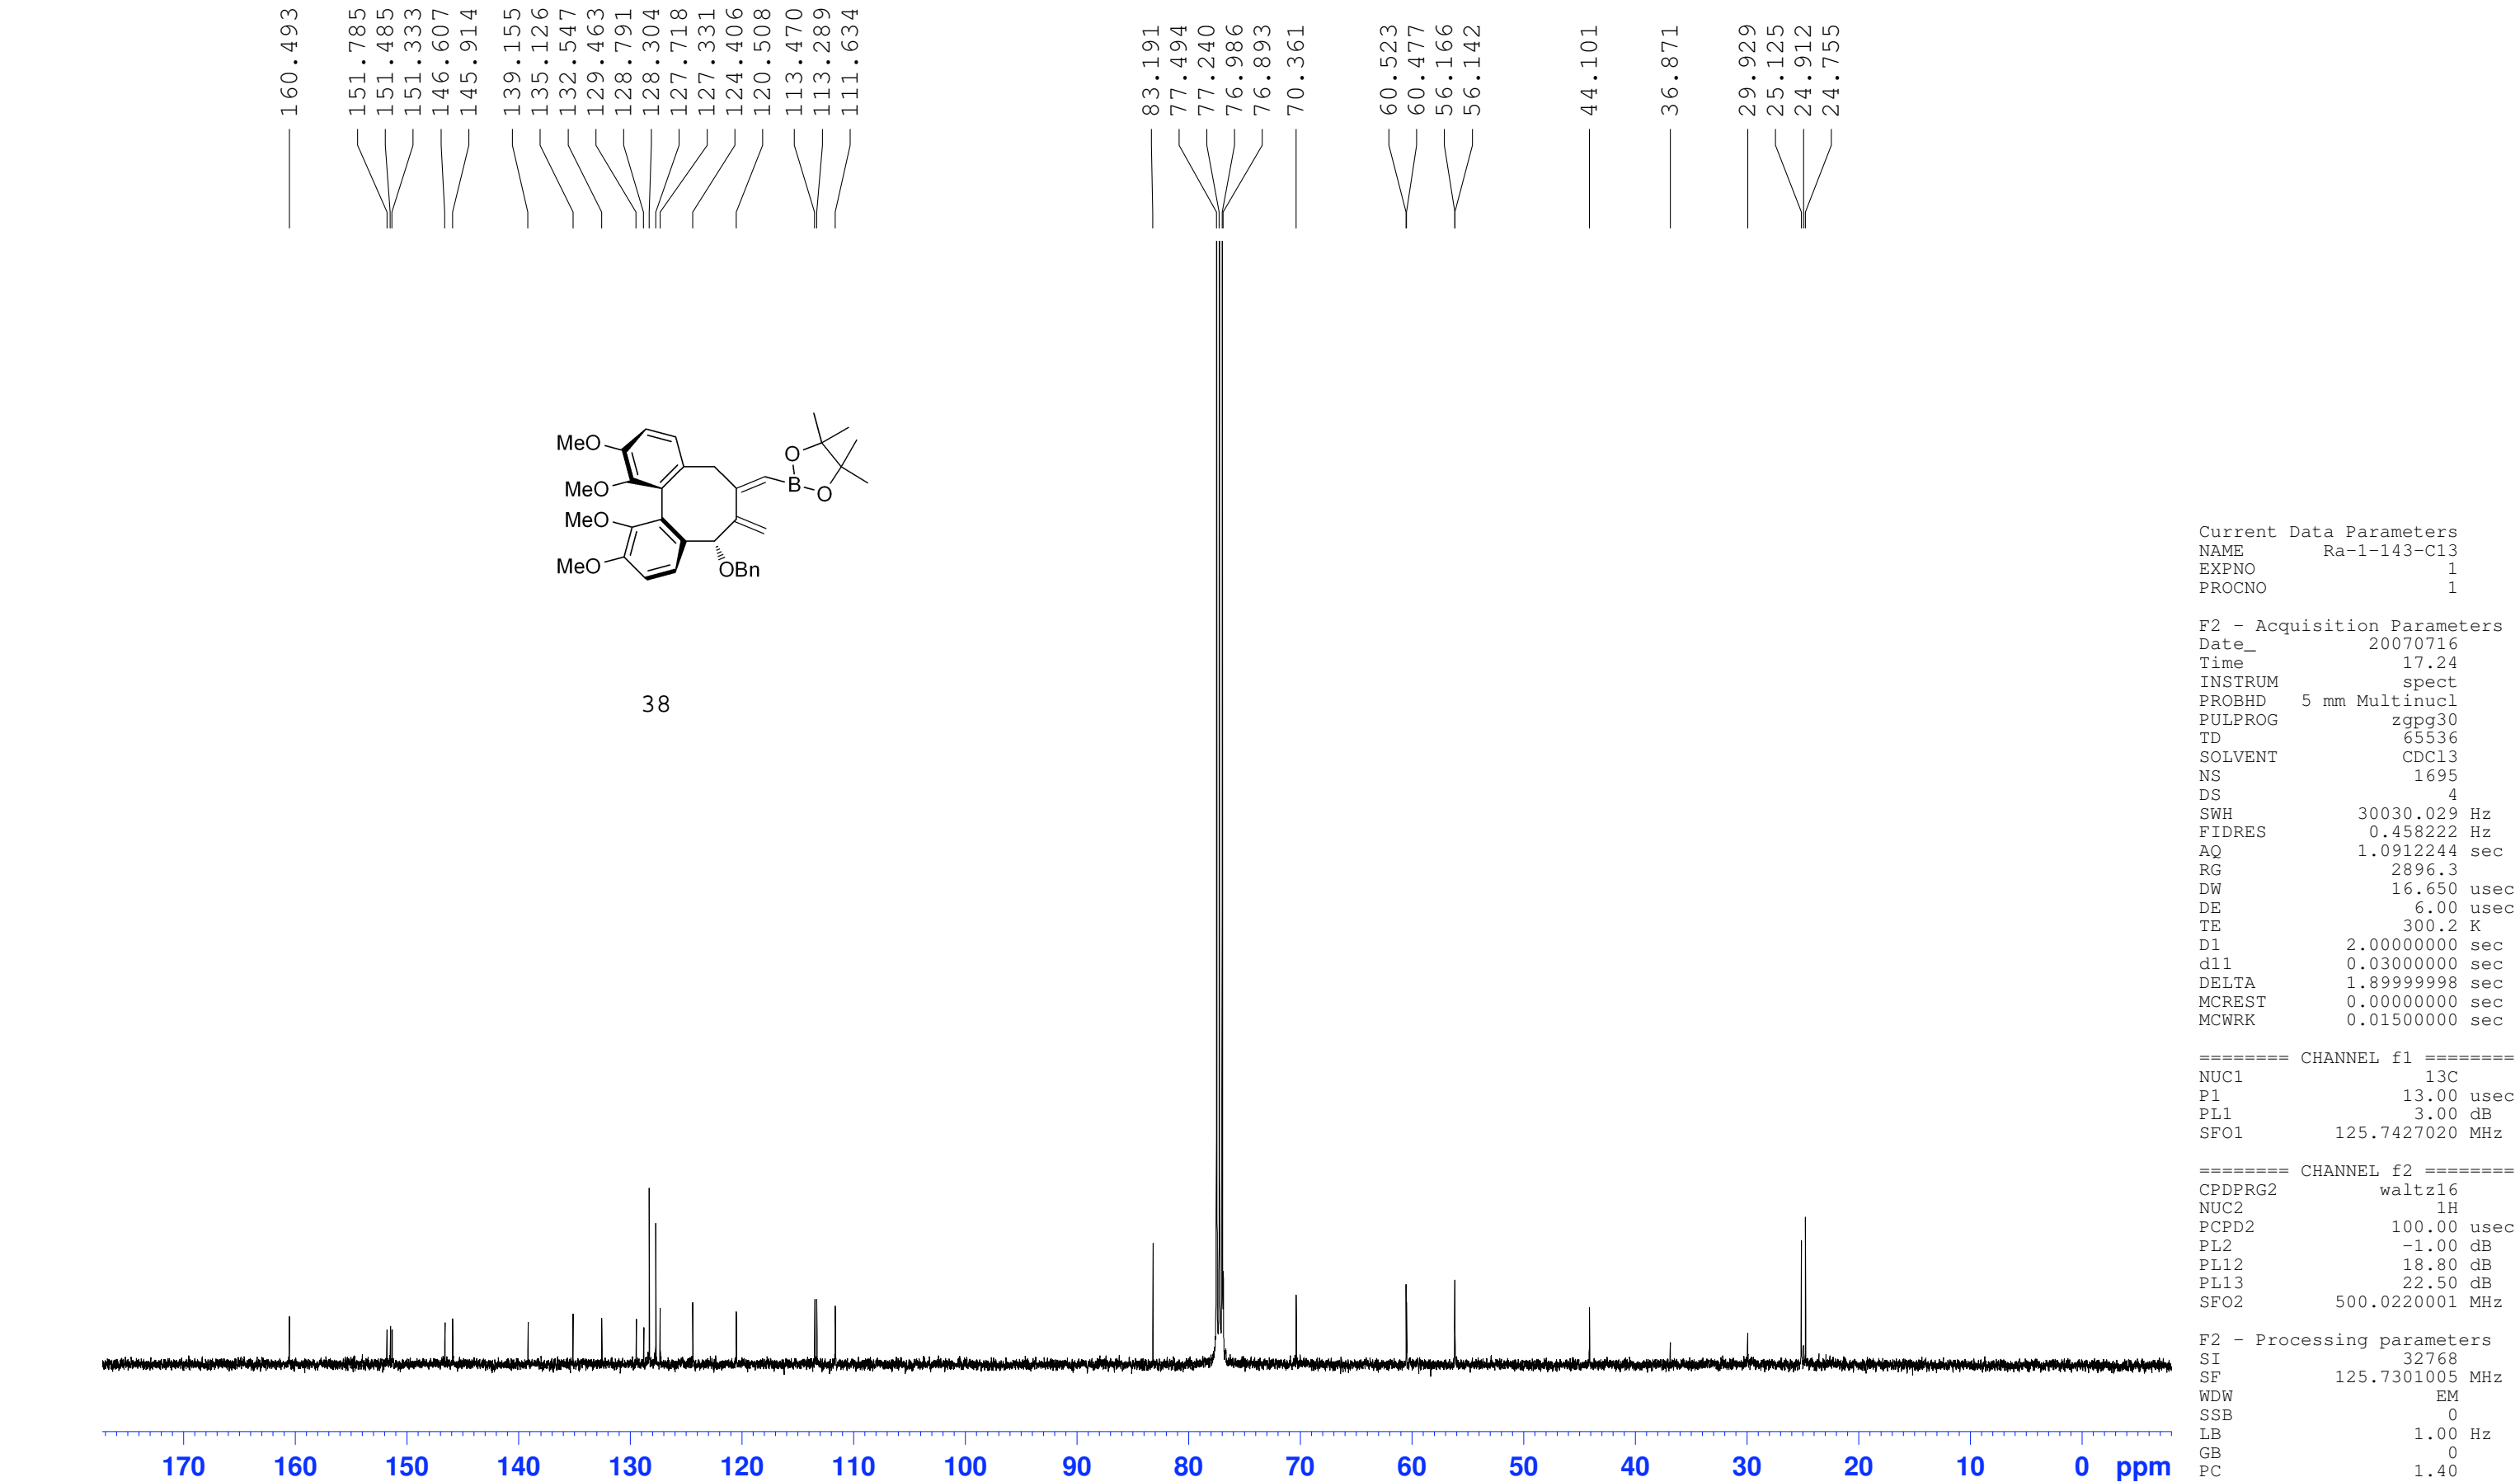

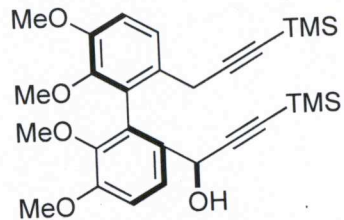

40

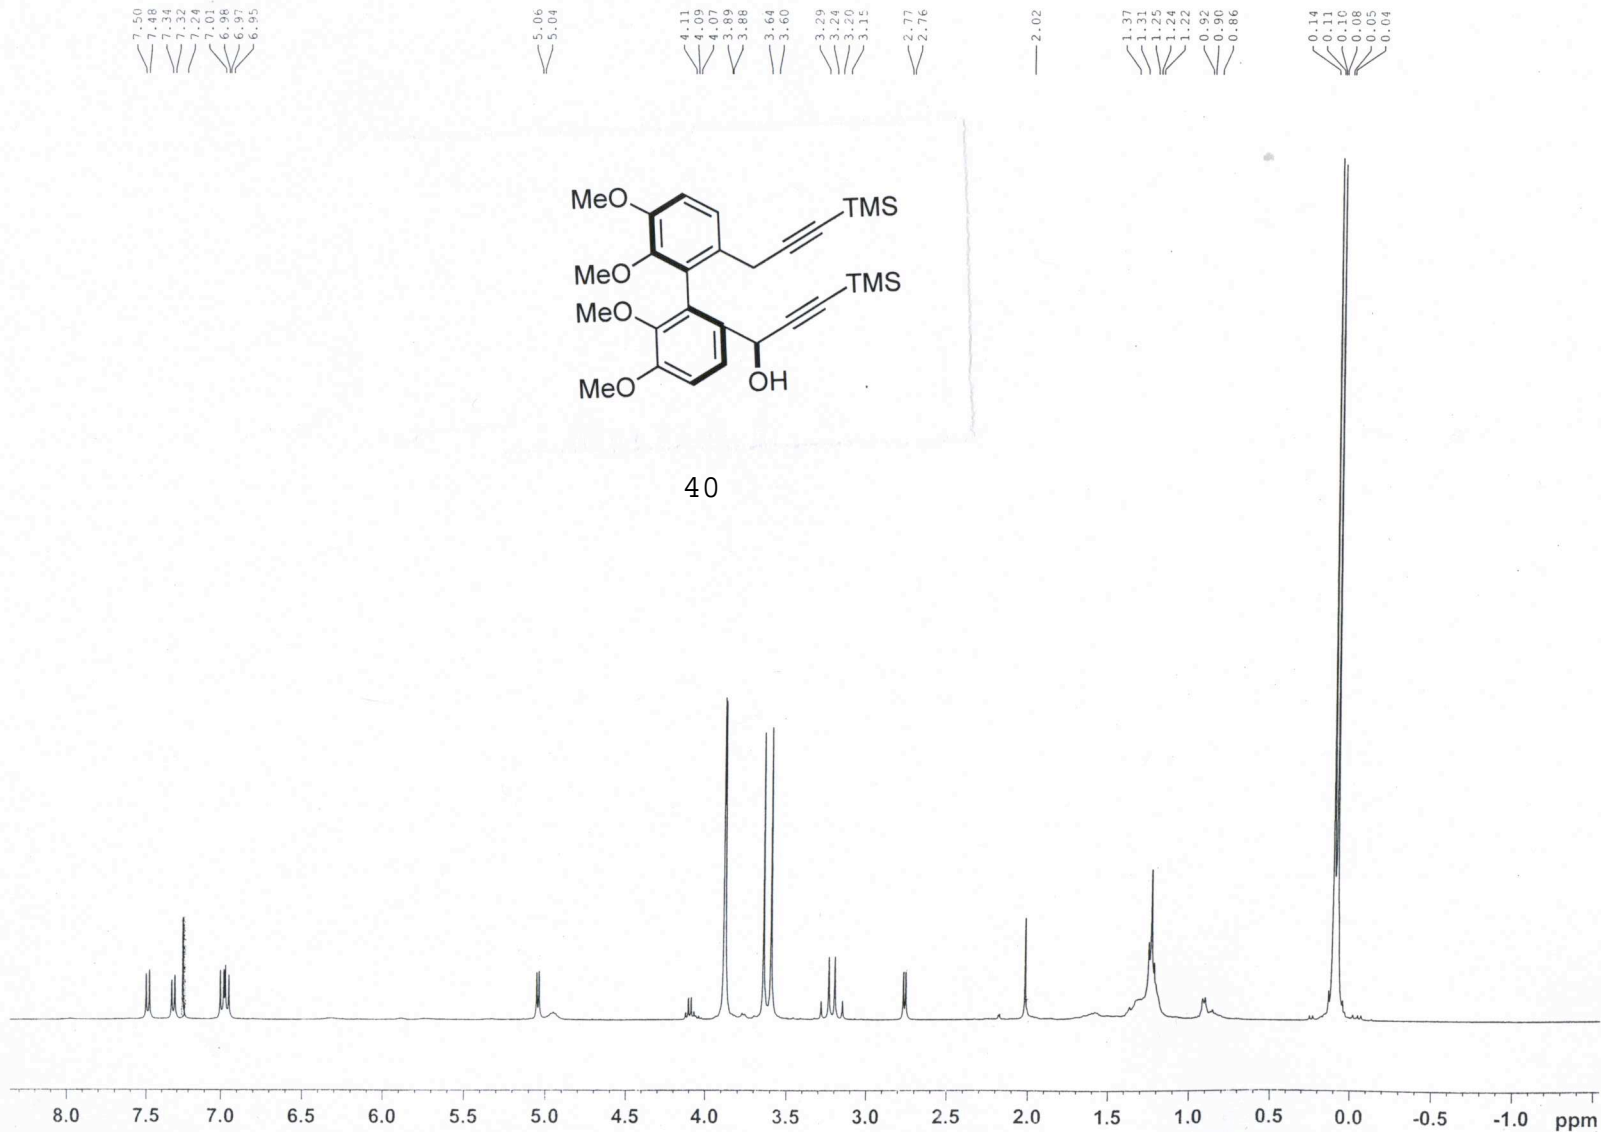

**BRUKER**

```
Current Data Parameters
NAME          Rs-2-36
EXPNO          1
PROCNO         1
```

```

F2 - Acquisition Parameters
Date_                20071120
Time_                12.07
INSTRUM              spect
PROBHD              5 mm QNP 1H/13
PULPROG              zg30
TD                  65536
SOLVENT              CDCl3
NS                   16
DS                   2
SWH                 8278.146 Hz
FIDRES              0.126314 Hz
AQ                 3.9584243 sec
RG                 143.7
DW                 60.400 usec
DE                 6.00 usec
TE                 301.2 K
D1                 1.0000000 sec
MCREST              0.0000000 sec
MCWRK              0.0150000 sec

```

```
===== CHANNEL f1 =====
NUC1                1H
P1                  13.00 usec
PL1                 0.00 dB
SFO1                400.1324710 MHz
```

```
F2 - Processing parameters
SI                      32768
SF                      400.1300181 MHz
WDW                      EM
SSB                      0
LB                      0.30 Hz
GB                      0
PC                      1.00
```

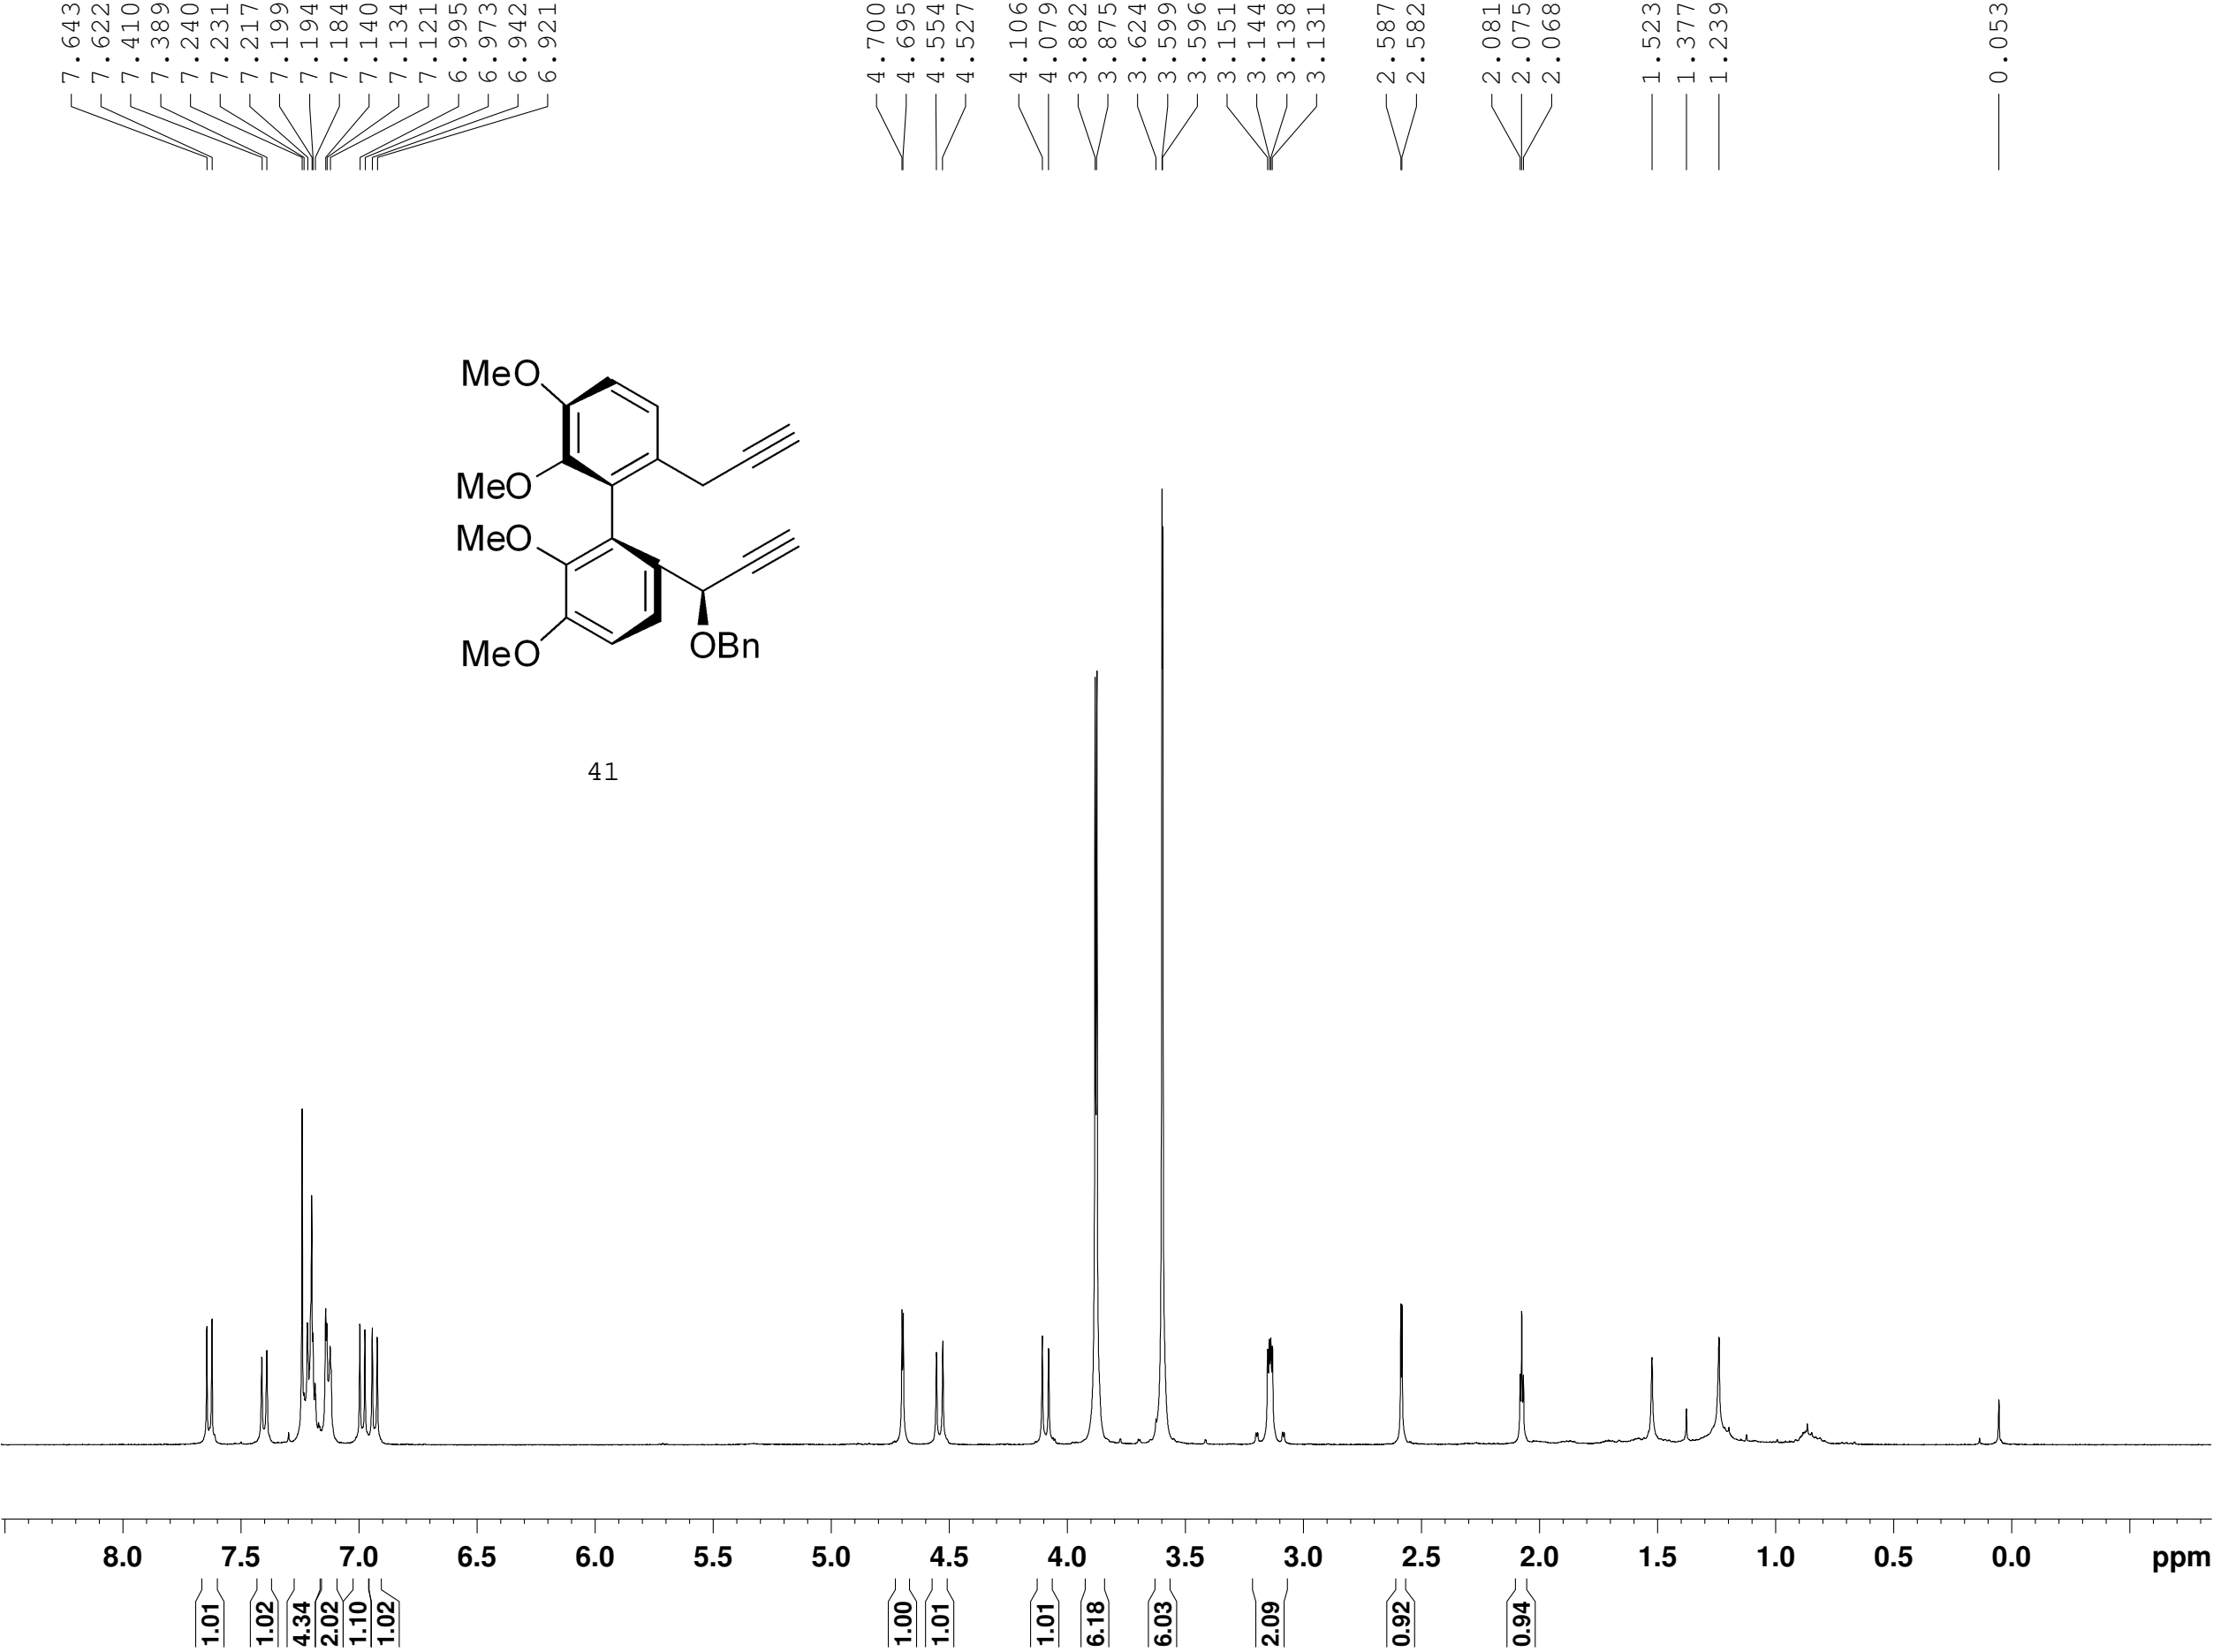

The Ohio State University  
Department of Chemistry  
NMR Facility  
400MHz – 0083

Current Data Parameters  
NAME Rs-2-40mp  
EXPNO 1  
PROCNO 1

F2 - Acquisition Parameters  
Date\_ 20071127  
Time 13.32  
INSTRUM spect  
PROBHD 5 mm QNP 1H/13  
PULPROG zg30  
TD 65536  
SOLVENT CDCl3  
NS 16  
DS 2  
SWH 8278.146 Hz  
FIDRES 0.126314 Hz  
AQ 3.9584243 sec  
RG 228.1  
DW 60.400 use  
DE 6.00 use  
TE 300.2 K  
D1 1.00000000 sec  
MCREST 0.00000000 sec  
MCWRK 0.01500000 sec

===== CHANNEL f1 =====  
NUC1 1H  
P1 13.00 use  
PL1 0.00 dB  
SFO1 400.1324710 MHz

F2 - Processing parameters  
SI 32768  
SF 400.1300181 MHz  
WDW EM  
SSB 0  
LB 0.30 Hz  
GB 0  
PC 1.00

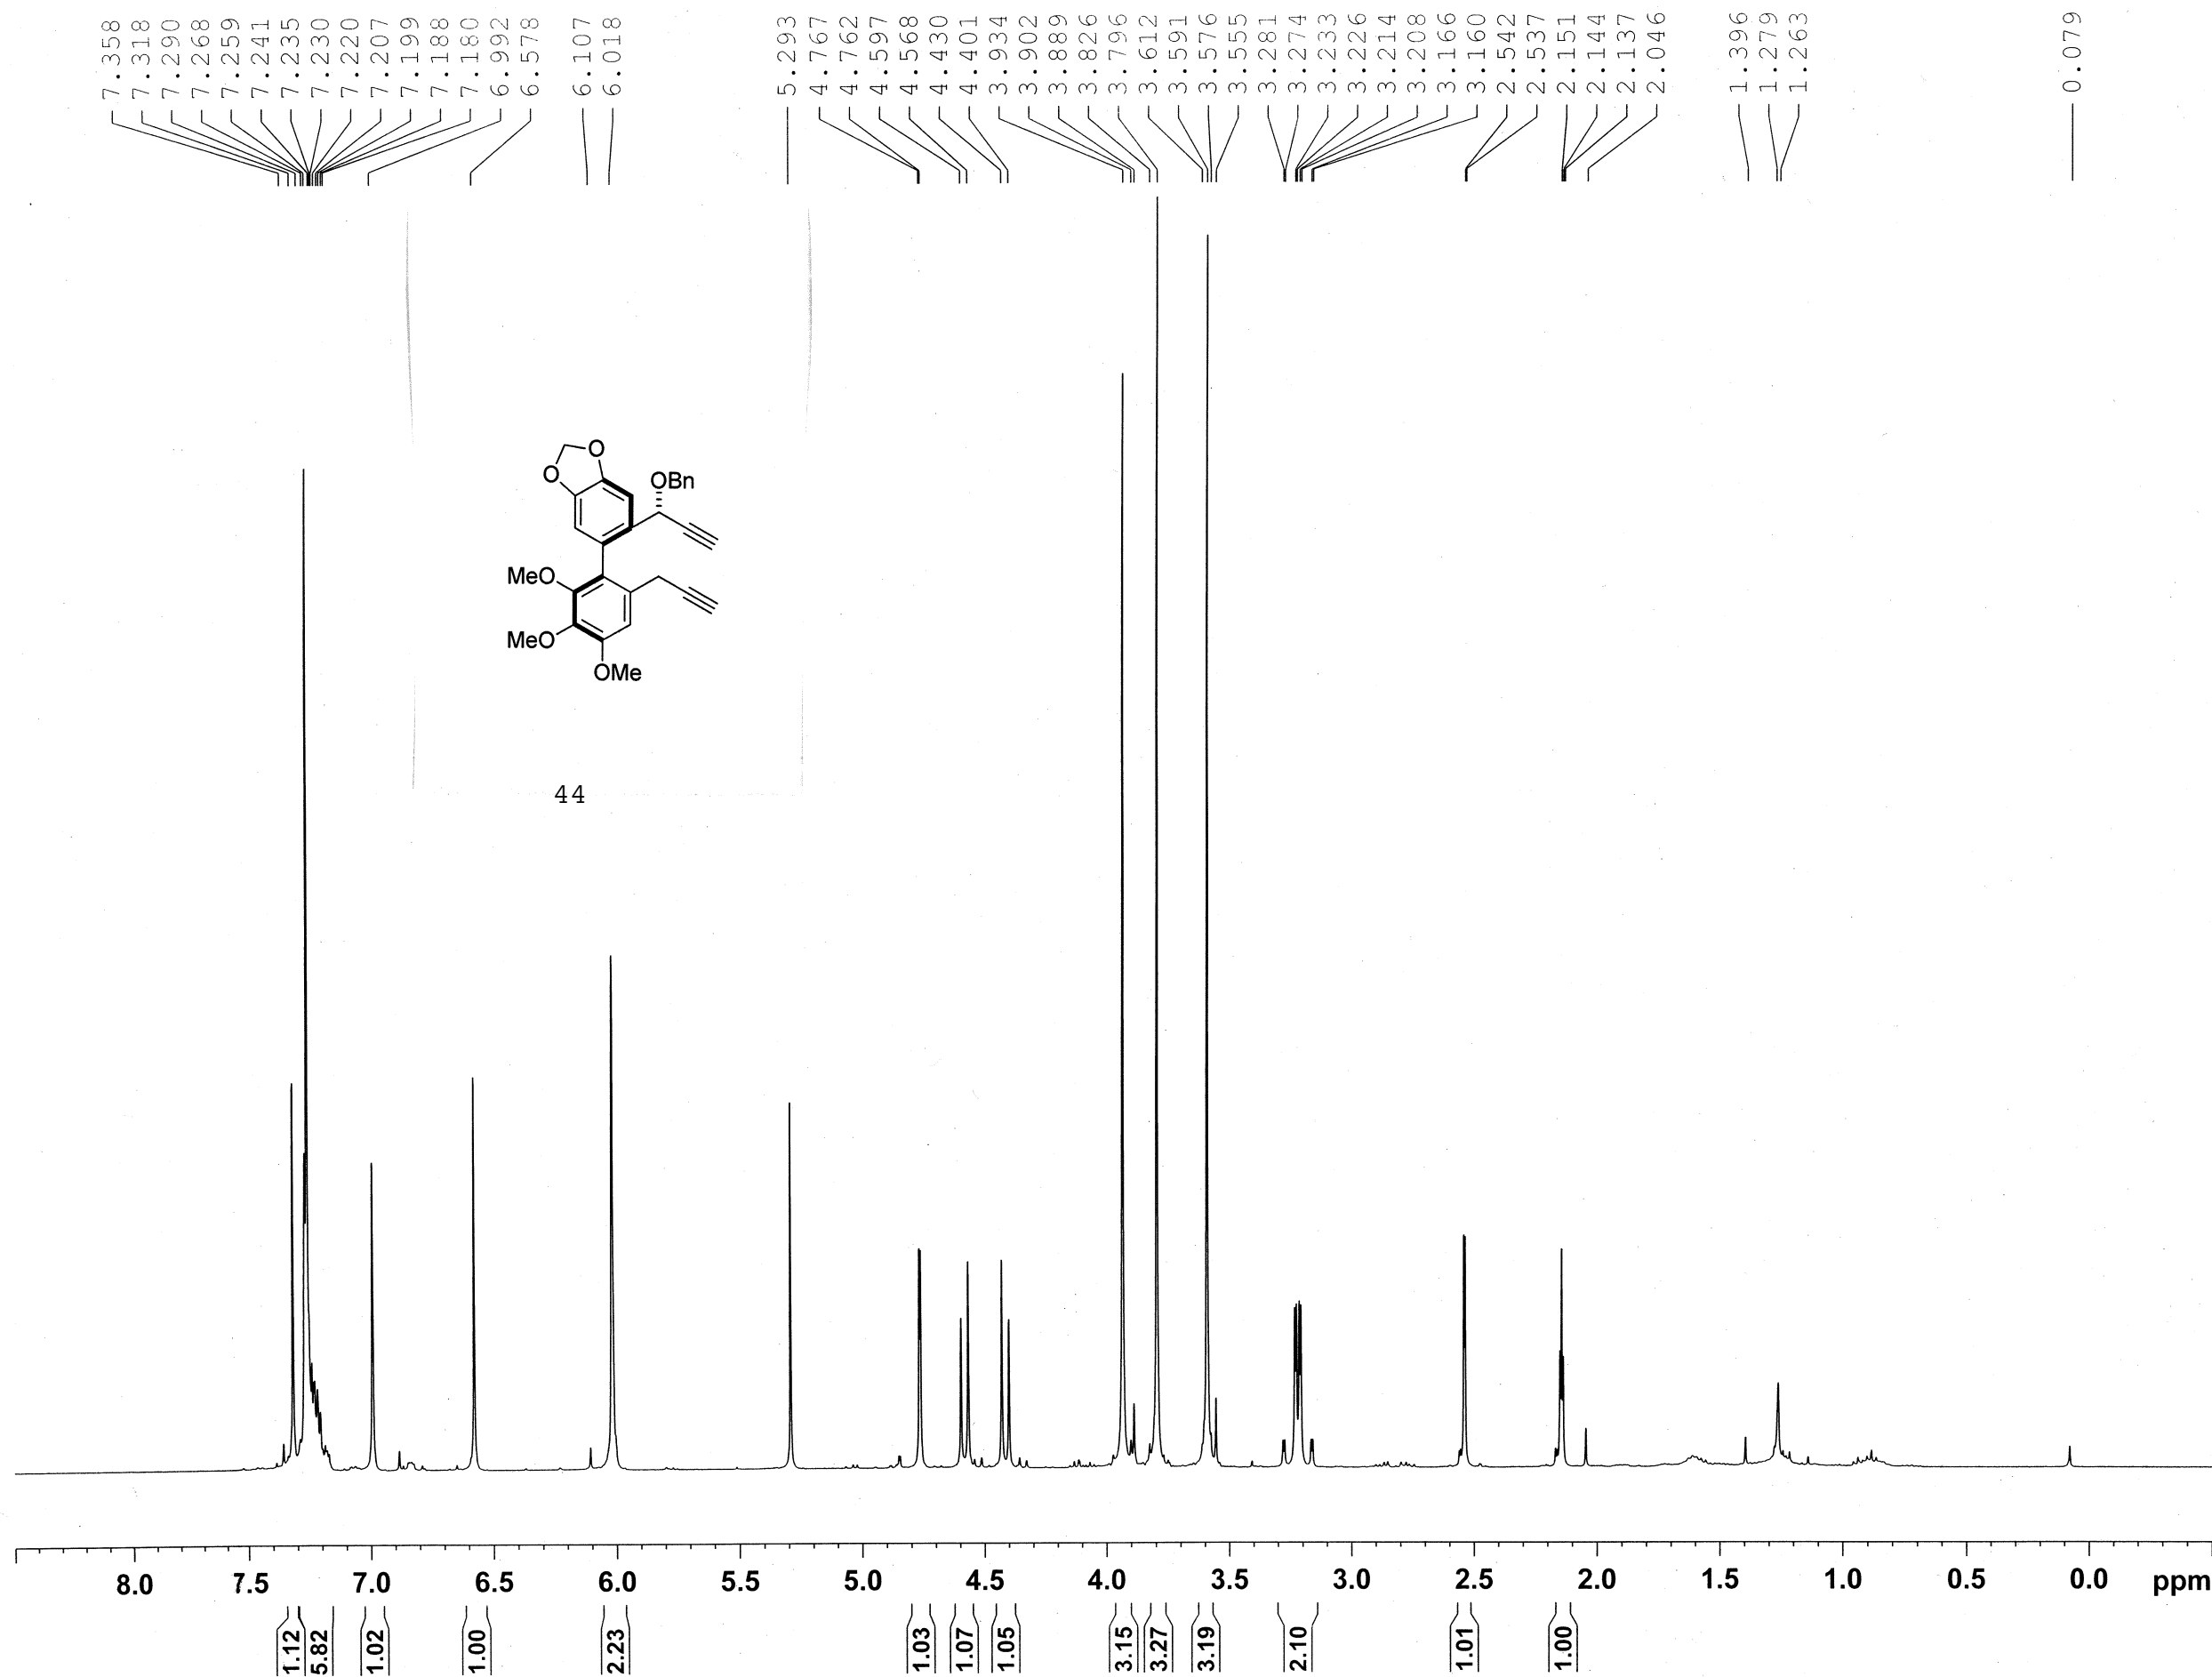

The Ohio State University  
Department of Chemistry  
NMR Facility  
400MHz - 0083

Current Data Parameters  
NAME Wgong-II-29 diyne  
EXPNO 9  
PROCNO 1

F2 - Acquisition Parameters  
Date\_ 20091221  
Time 14.04  
INSTRUM spect  
PROBHD 5 mm QNP 1H/13  
PULPROG zg30  
TD 65536  
SOLVENT CDCl3  
NS 16  
DS 2  
SWH 8278.146 Hz  
FIDRES 0.126314 Hz  
AQ 3.9584243 sec  
RG 114  
DW 60.400 usec  
DE 6.00 usec  
TE 300.2 K  
D1 1.00000000 sec  
TD0 1

===== CHANNEL f1 =====  
NUC1 1H  
P1 13.00 usec  
PL1 0.00 dB  
SFO1 400.1324710 MHz

F2 - Processing parameters  
SI 32768  
SF 400.1300097 MHz  
WDW EM  
SSB 0  
LB 0.30 Hz  
GB 0  
PC 1.00



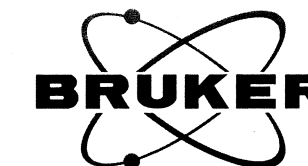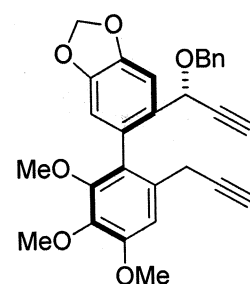

44

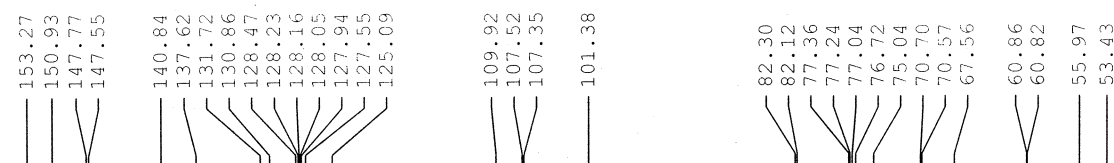

Current Data Parameters  
NAME Wgong-II-29 diyne C13  
EXPNO 10  
PROCNO 1

F2 - Acquisition Parameters  
Date\_ 20091221  
Time\_ 14.11  
INSTRUM spect  
PROBHD 5 mm QNP 1H/13  
PULPROG zgpg30  
TD 65536  
SOLVENT CDCl3  
NS 780  
DS 4  
SWH 23980.814 Hz  
FIDRES 0.365918 Hz  
AQ 1.3664756 sec  
RG 4597.6  
DW 20.850 usec  
DE 6.00 usec  
TE 300.2 K  
D1 2.00000000 sec  
d11 0.03000000 sec  
DELTA 1.89999998 sec  
TD0 1

===== CHANNEL f1 =====  
NUC1 13C  
P1 10.50 usec  
PL1 0.00 dB  
SFO1 100.6228298 MHz

===== CHANNEL f2 =====  
CPDPRG2 waltz16  
NUC2 1H  
PCPD2 80.00 usec  
PL2 -6.00 dB  
PL12 14.56 dB  
PL13 16.50 dB  
SFO2 400.1316005 MHz

F2 - Processing parameters  
SI 32768  
SF 100.6127690 MHz  
WDW EM  
SSB 0  
LB 1.00 Hz  
GB 0  
PC 1.00

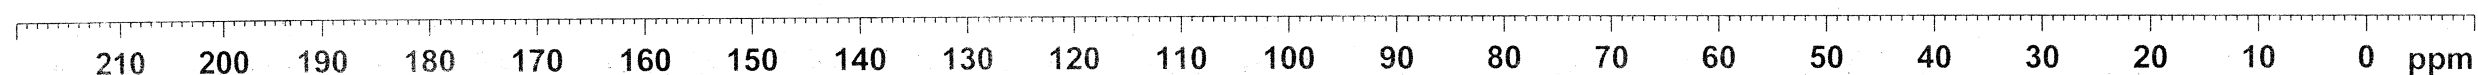

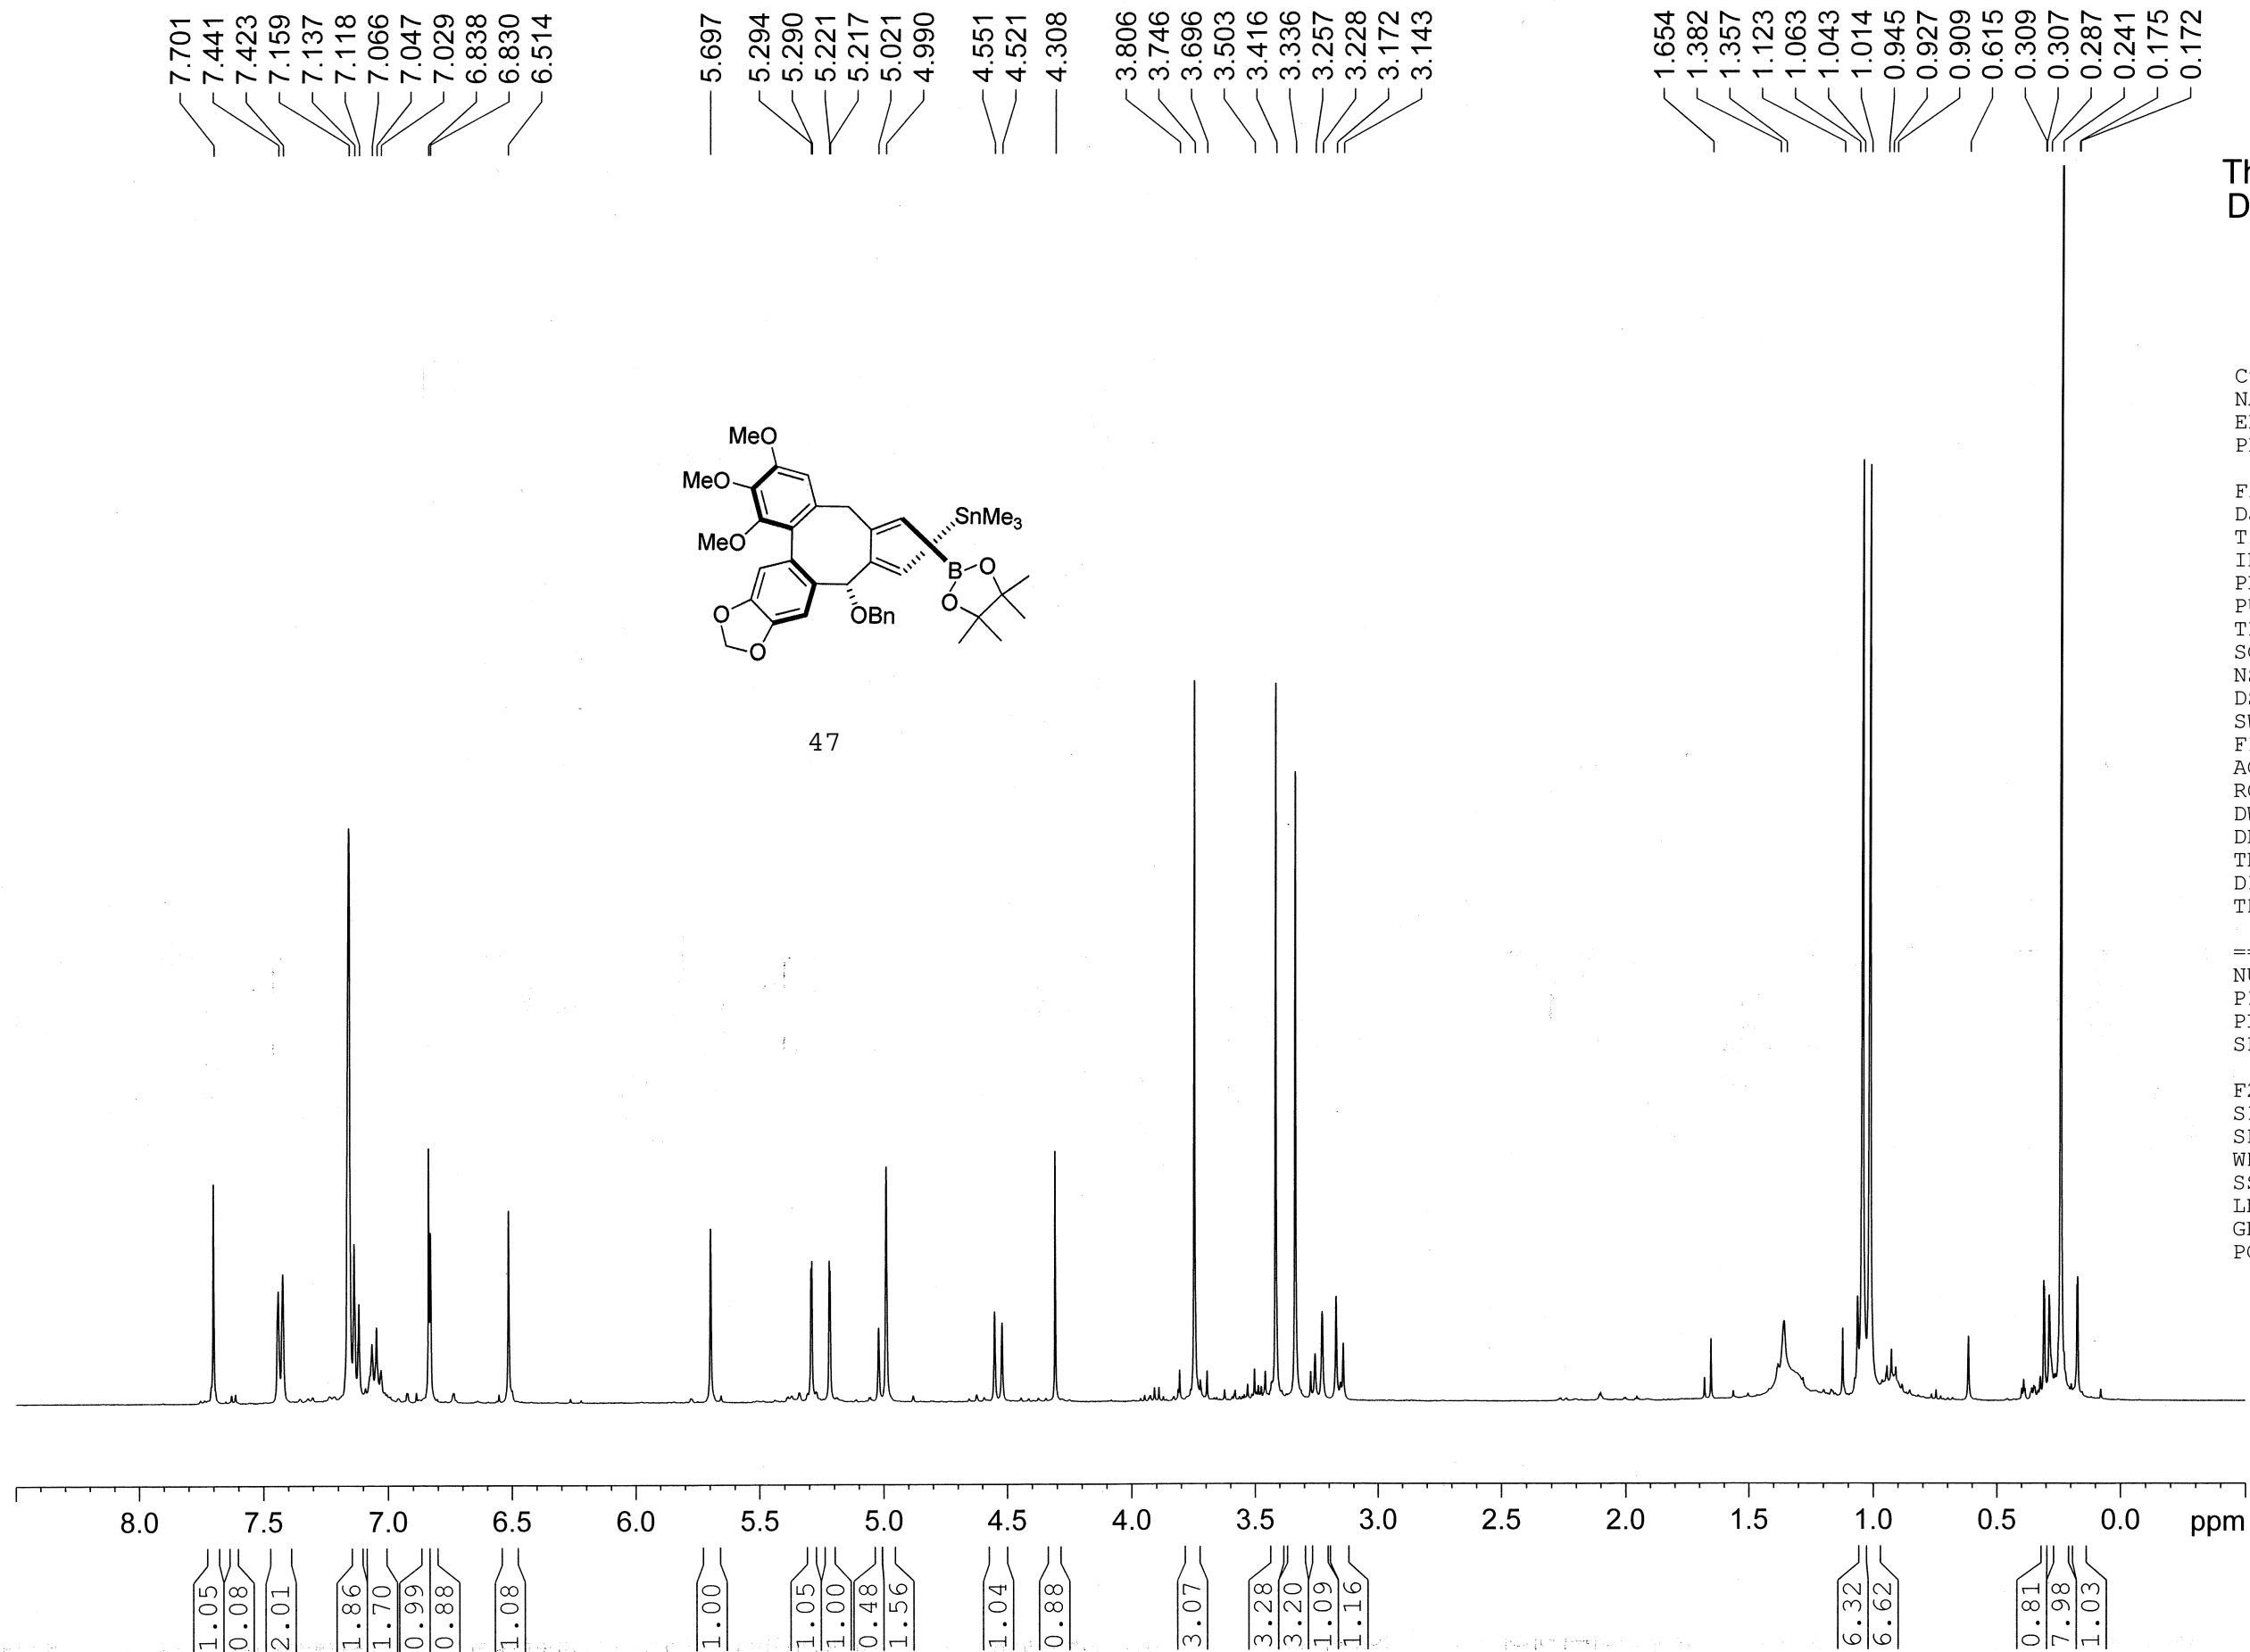

The Ohio State University  
Department of Chemistry  
NMR Facility

```
Current Data Parameters
NAME      Wgong-II-78-2
EXPNO      77
PROCNO     1
```

```

F2 - Acquisition Parameters
Date_                20100314
Time_                15.43
INSTRUM              spect
PROBHD      5 mm QNP 1H/13
PULPROG              zg30
TD                   65536
SOLVENT              C6D6
NS                    16
DS                     2
SWH                   8278.146 Hz
FIDRES               0.126314 Hz
AQ                   3.9584243 sec
RG                     57
DW                   60.400 usec
DE                    6.00 usec
TE                   300.2 K
D1                   1.00000000 sec
TD0                   1

```

```
===== CHANNEL f1 =====
NUC1          1H
P1             13.00 usec
PL1            0.00 dB
SFO1          400.1324710 MHz
```

```

F2 - Processing parameters
SI                      32768
SF                    400.1300453 MHz
WDW                      EM
SSB                      0
LB                      0.30 Hz
GB                      0
PC                      1.00

```

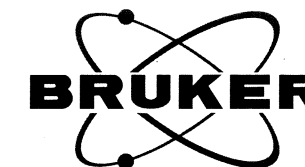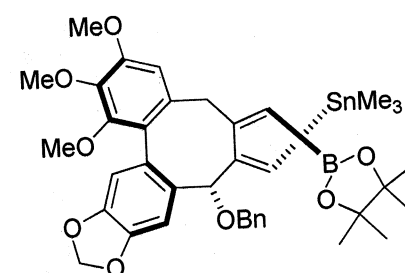

47

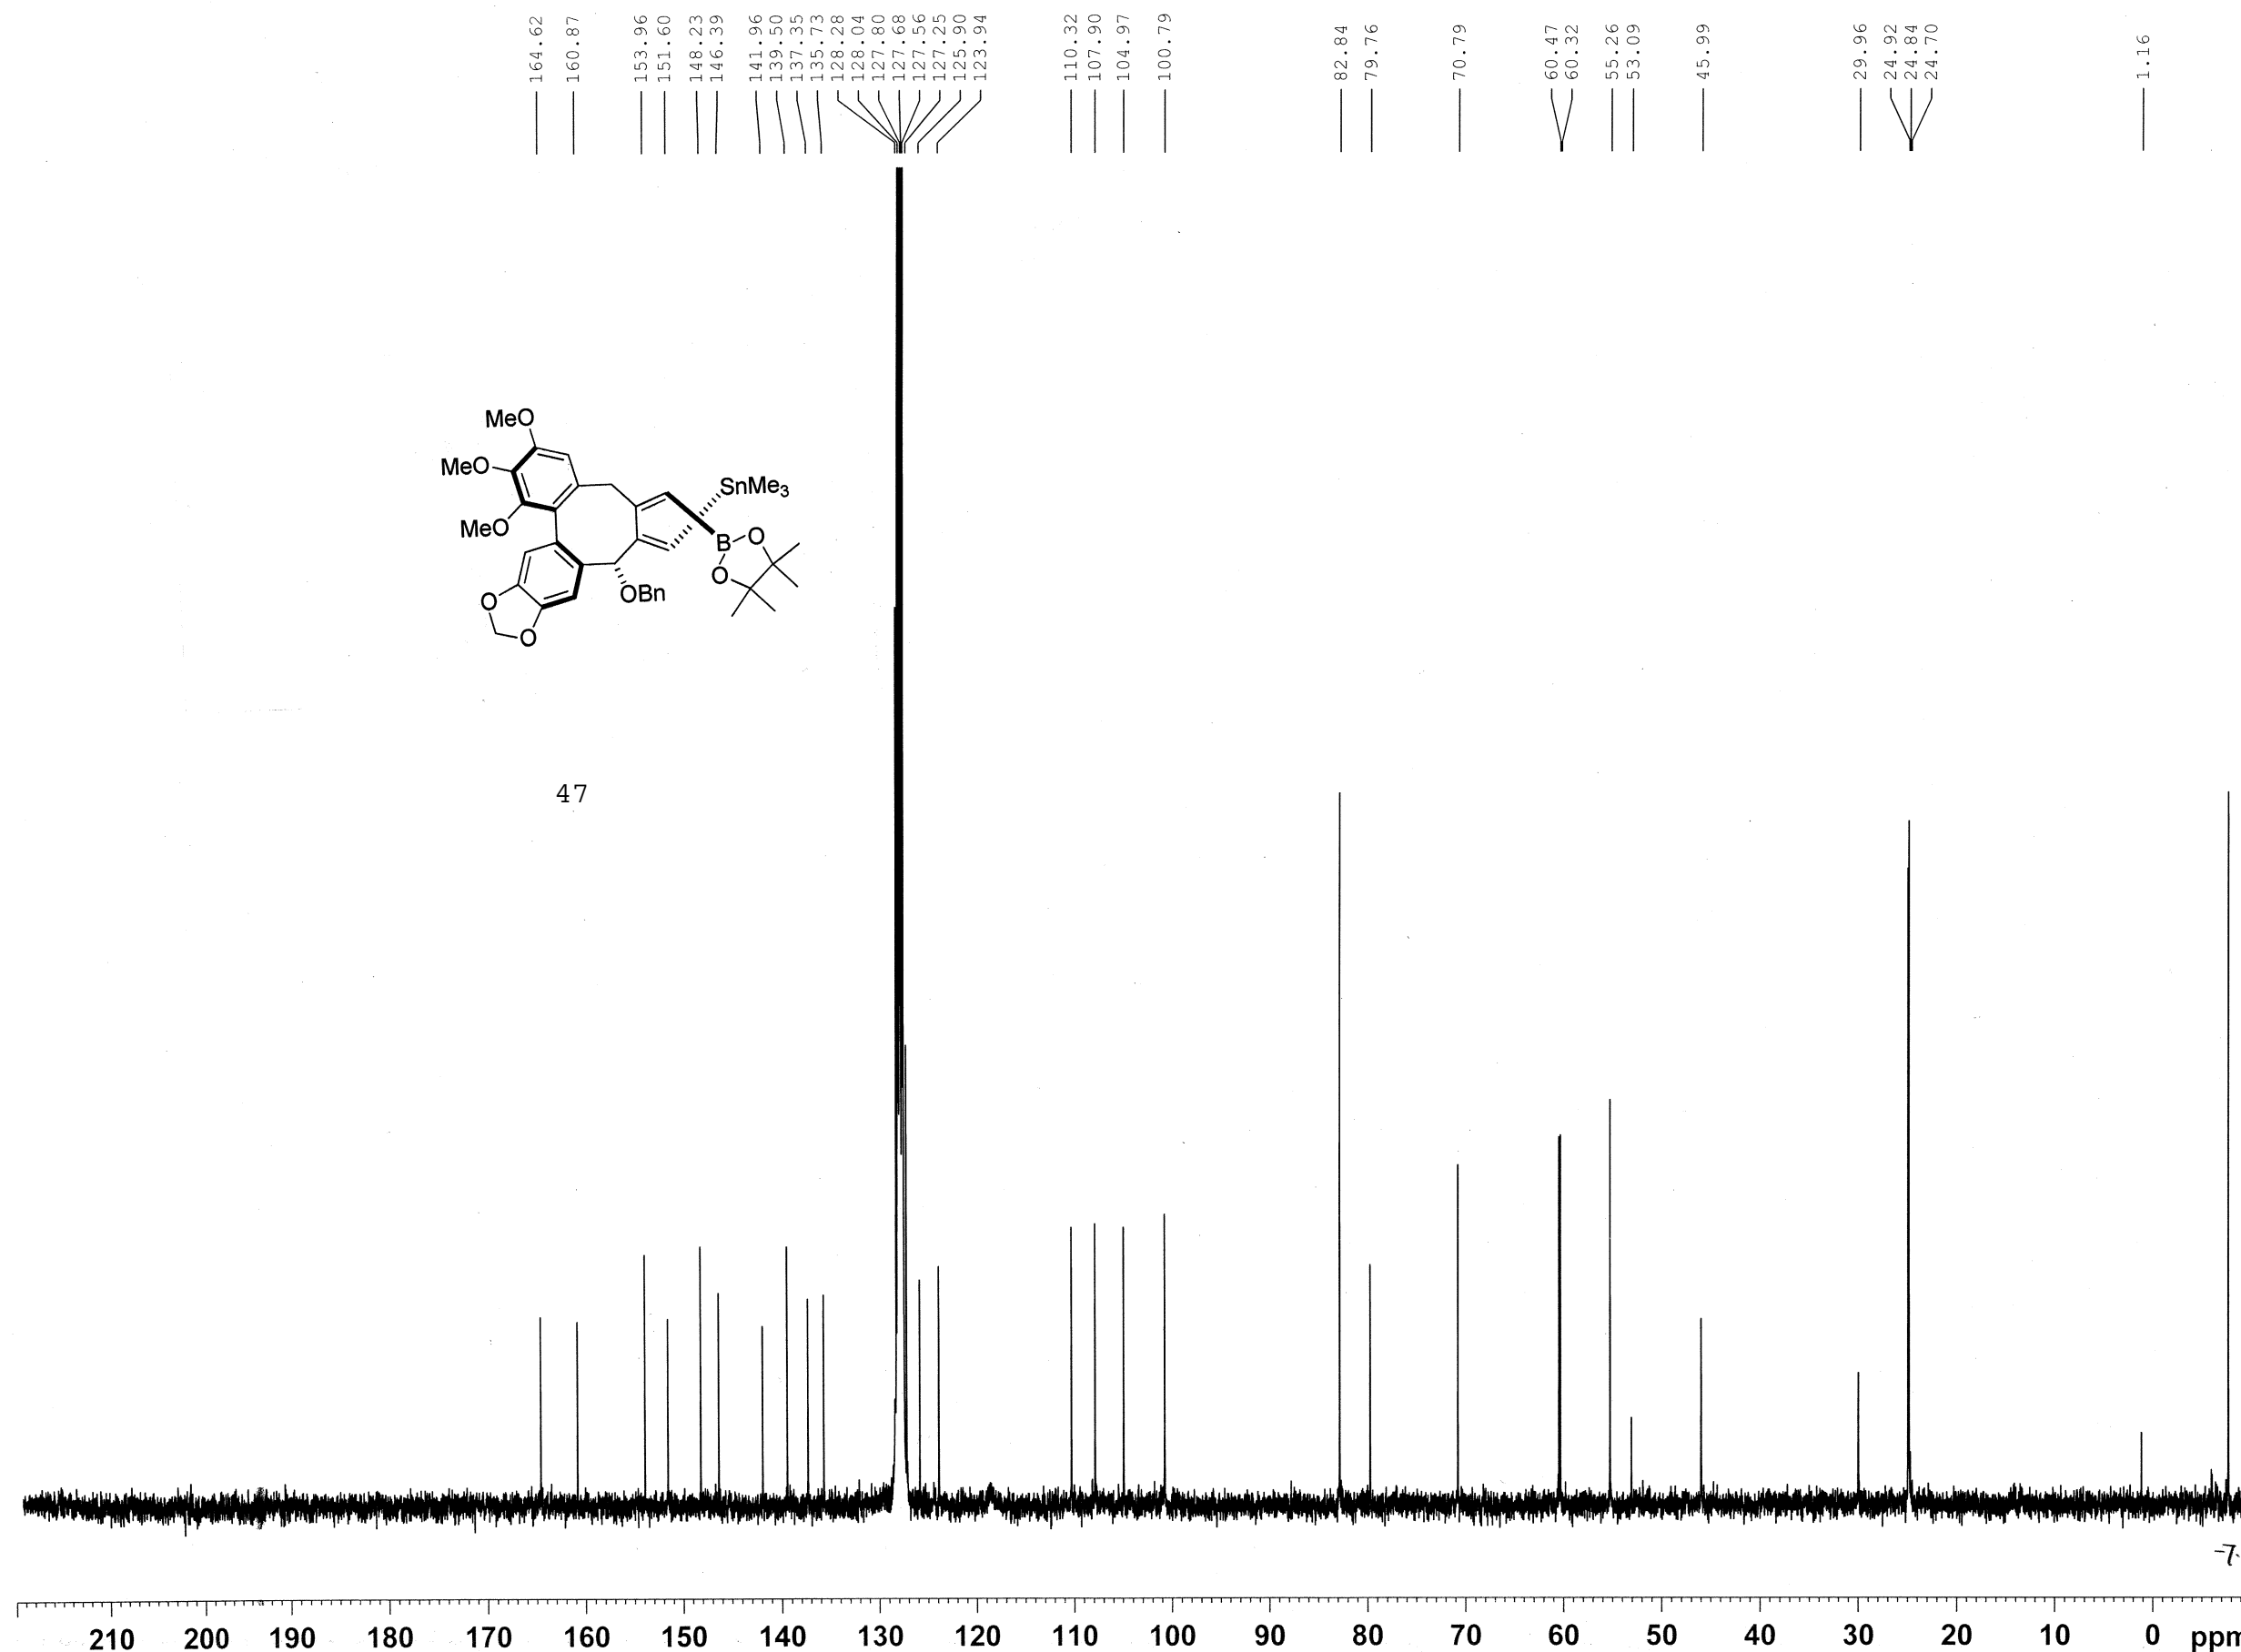

Current Data Parameters  
NAME Wgong-II-78-2 C13  
EXPNO 78  
PROCNO 1

F2 - Acquisition Parameters  
Date\_ 20100314  
Time\_ 15.54  
INSTRUM spect  
PROBHD 5 mm QNP 1H/13  
PULPROG zgpg30  
TD 65536  
SOLVENT XXXX C6D6  
NS 728  
DS 4  
SWH 23980.814 Hz  
FIDRES 0.365918 Hz  
AQ 1.3664756 sec  
RG 2896.3  
DW 20.850 usec  
DE 6.00 usec  
TE 300.2 K  
D1 2.00000000 sec  
d11 0.03000000 sec  
DELTA 1.89999998 sec  
TD0 1

===== CHANNEL f1 =====  
NUC1 13C  
P1 10.50 usec  
PL1 0.00 dB  
SFO1 100.6228298 MHz

===== CHANNEL f2 =====  
CPDPRG2 waltz16  
NUC2 1H  
PCPD2 80.00 usec  
PL2 -6.00 dB  
PL12 14.56 dB  
PL13 16.50 dB  
SFO2 400.1316005 MHz

F2 - Processing parameters  
SI 32768  
SF 100.6127690 MHz  
WDW EM  
SSB 0  
LB 1.00 Hz  
GB 0  
PC 1.00

-7.70

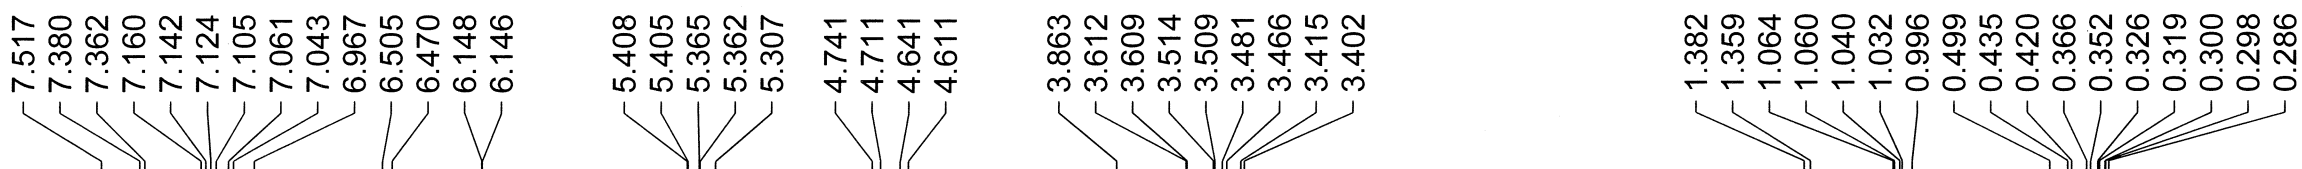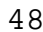

```
Current Data Parameters
NAME      Wgong-II-78-1 p
EXPNO      463
PROCNO     1
```

```

F2 - Acquisition Parameters
Date_                20110427
Time                 12.16
INSTRUM              spect
PROBHD               5 mm QNP 1H/13
PULPROG              zg30
TD                   65536
SOLVENT              C6D6
NS                     16
DS                     2
SWH                   8278.146 Hz
FIDRES               0.126314 Hz
AQ                   3.9584243 sec
RG                     90.5
DW                   60.400 usec
DE                     6.00 usec
TE                   300.2 K
D1                   1.00000000 sec
TD0                   1

```

```
===== CHANNEL f1 =====
NUC1                1H
P1                  14.50 usec
PL1                 0.00 dB
SFO1               400.1324710 MHz
```

```

F2 - Processing parameters
SI                      32768
SF                      400.1300451 MHz
WDW                      EM
SSB                      0
LB                      0.30 Hz
GB                      0
PC                      1.00

```

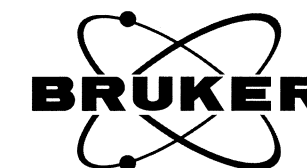

Current Data Parameters  
NAME Wgong-II-78-1 p C13  
EXPNO 464  
PROCNO 1

F2 - Acquisition Parameters  
Date\_ 20110427  
Time\_ 12.29  
INSTRUM spect  
PROBHD 5 mm QNP 1H/13  
PULPROG zgpg30  
TD 65536  
SOLVENT ~~CDCl3~~ C6D6  
NS 537  
DS 4  
SWH 23980.814 Hz  
FIDRES 0.365918 Hz  
AQ 1.3664756 sec  
RG 1625.5  
DW 20.850 usec  
DE 6.00 usec  
TE 300.2 K  
D1 2.00000000 sec  
d11 0.03000000 sec  
DELTA 1.89999998 sec  
TD0 1

===== CHANNEL f1 =====  
NUC1 13C  
P1 10.50 usec  
PL1 0.00 dB  
SFO1 100.6228298 MHz

===== CHANNEL f2 =====  
CPDPRG2 waltz16  
NUC2 1H  
PCPD2 80.00 usec  
PL2 -6.00 dB  
PL12 14.56 dB  
PL13 16.50 dB  
SFO2 400.1316005 MHz

F2 - Processing parameters  
SI 32768  
SF 100.6127690 MHz  
WDW EM  
SSB 0  
LB 1.00 Hz  
GB 0  
PC 1.40

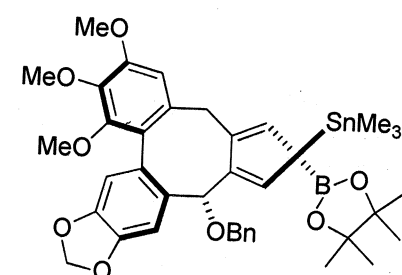

48

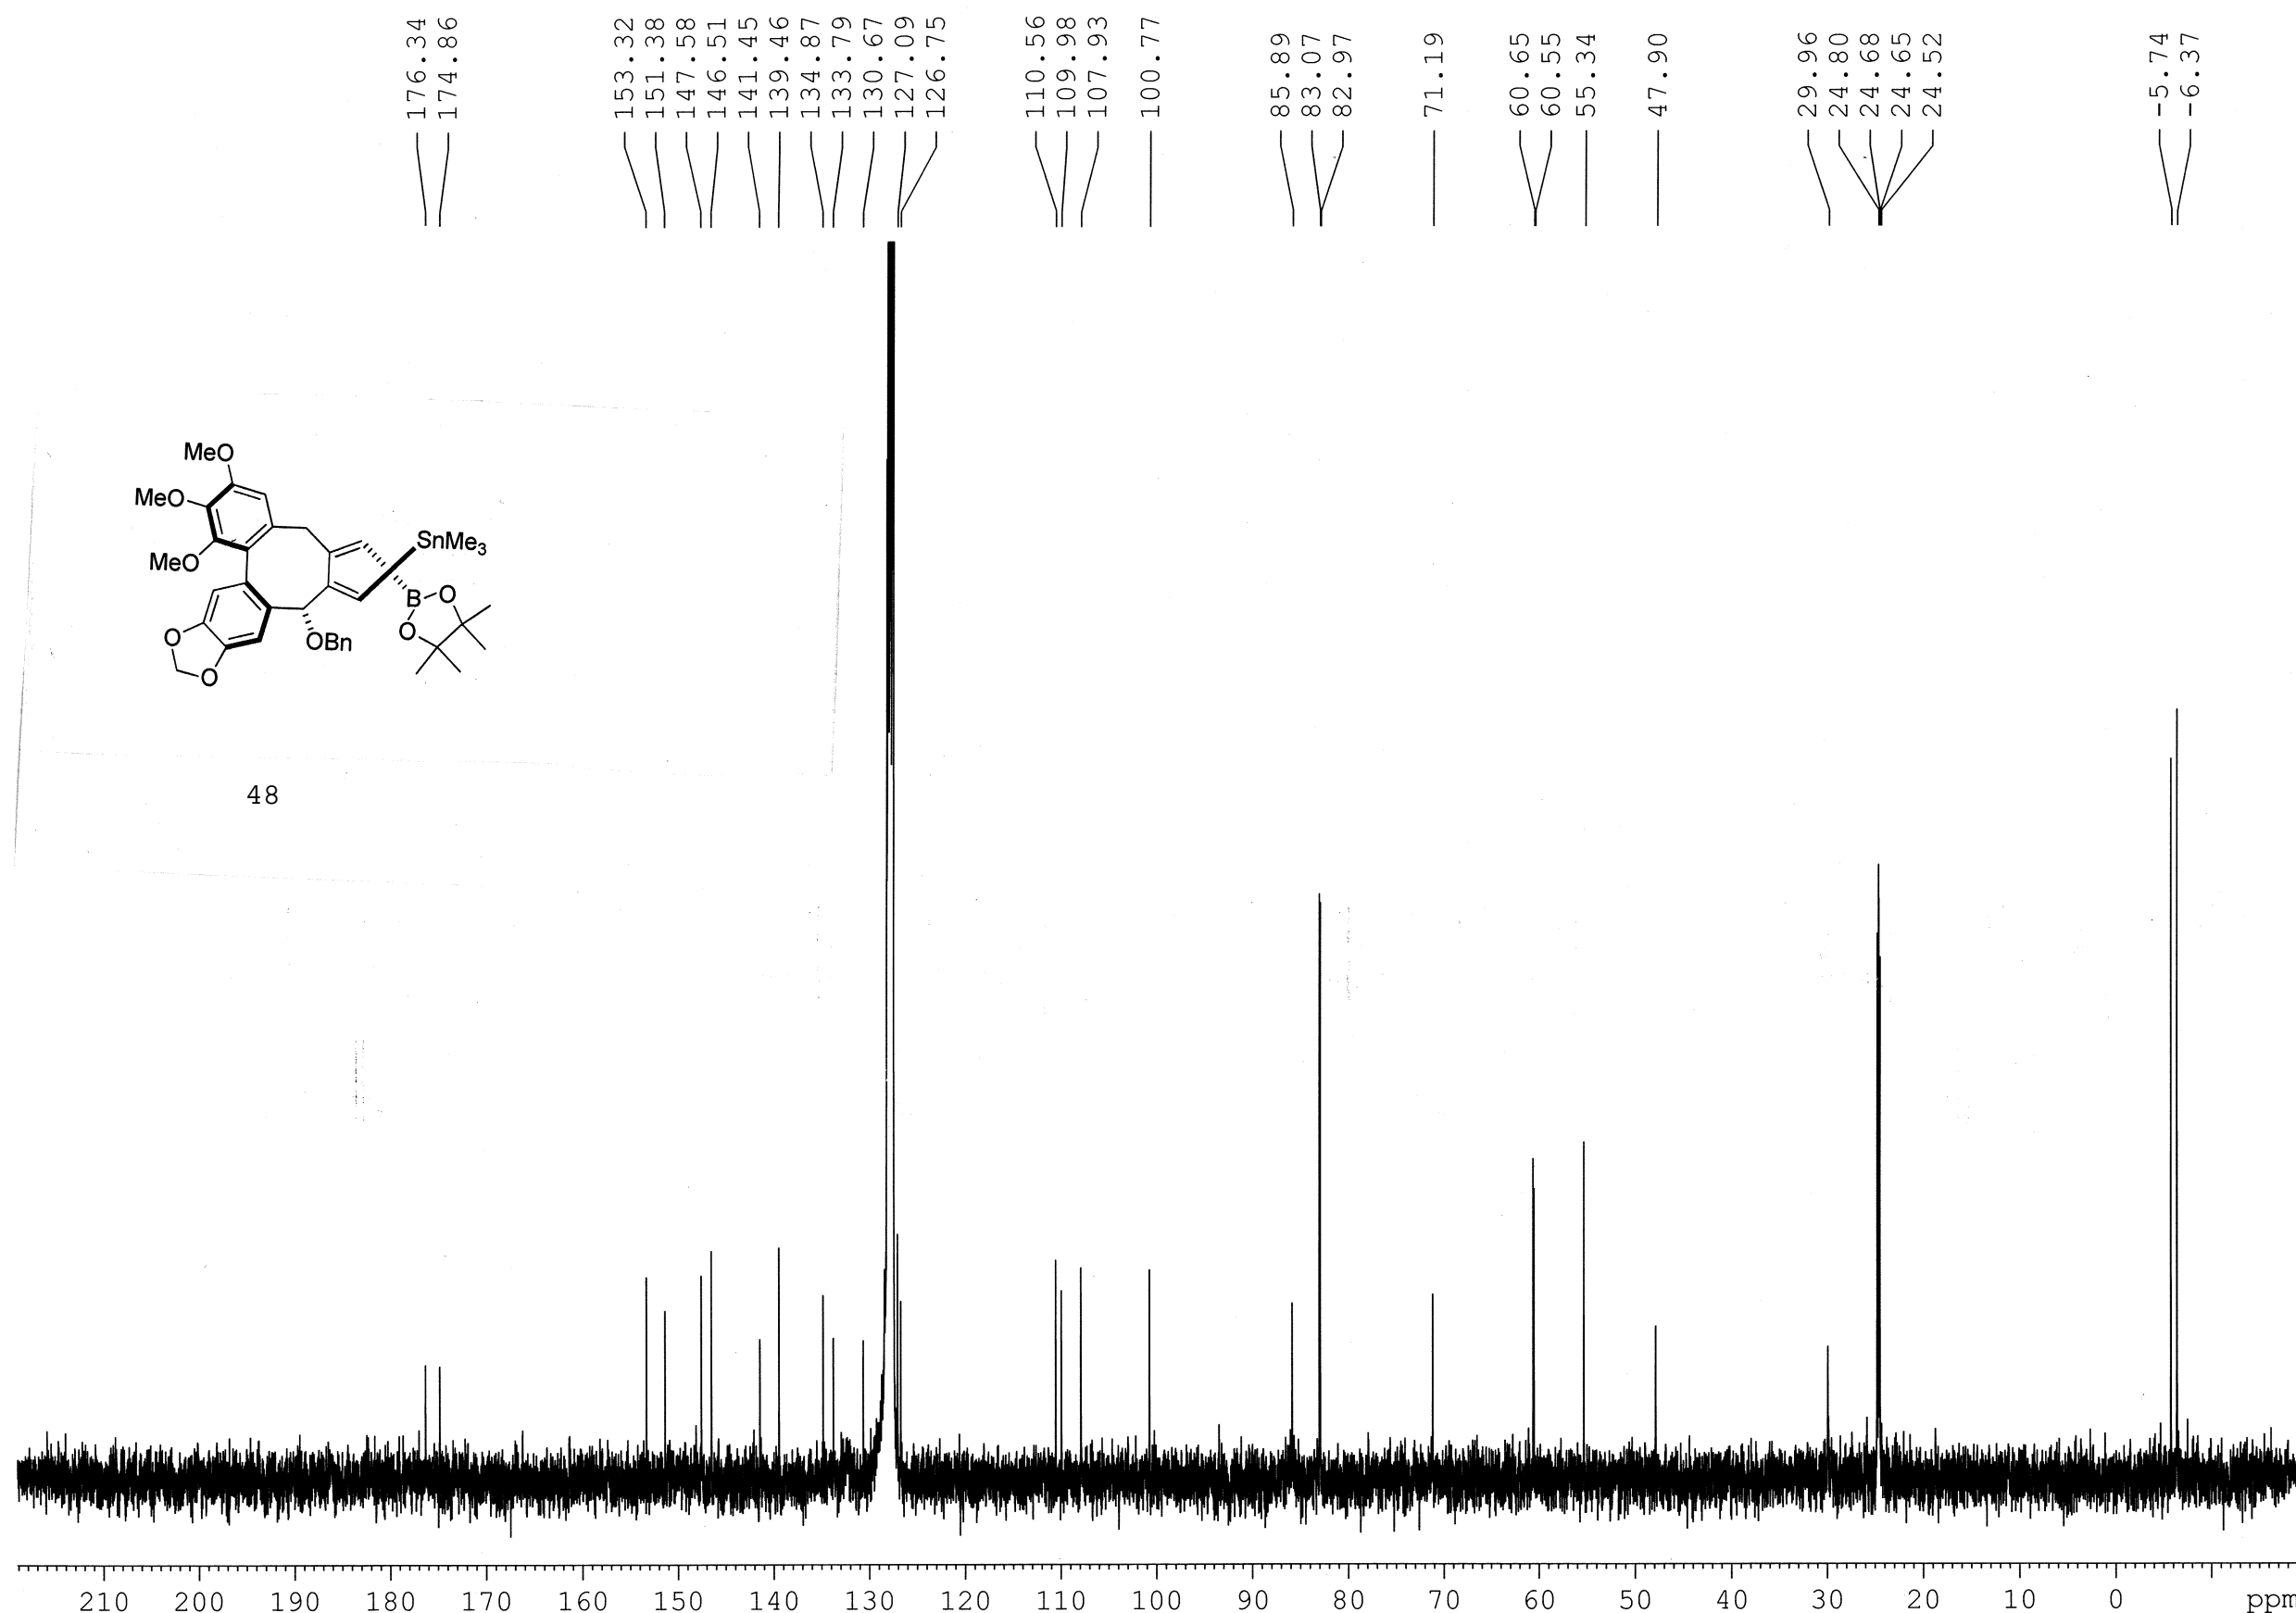

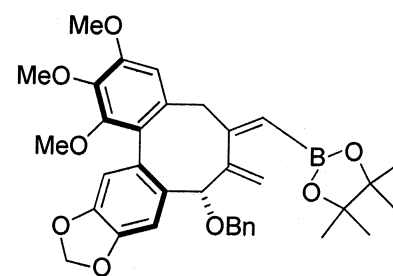

49

```
Current Data Parameters
NAME           Wgong-II-67
EXPNO          78
PROCNO         1
```

```

Date_                20100315
Time_                15.36
INSTRUM              spect
PROBHD              5 mm QNP 1H/13
PULPROG              zg30
TD                  65536
SOLVENT              C6D6
NS                   16
DS                   2
SWH                  8278.146 Hz
FIDRES              0.126314 Hz
AQ                  3.9584243 sec
RG                   181
DW                   60.400 usec
DE                   6.00 usec
TE                   300.2 K
D1                   1.00000000 sec
TD0                  1

```

```
===== CHANNEL f1 =====
NUC1                      1H
P1                        13.00 usec
PL1                       0.00 dB
SFO1                     400.1324710 MHz
```

```

F2 - Processing parameters
SI                32768
SF                400.1300454 MHz
WDW               EM
SSB               0
LB                0.30 Hz
GB                0
PC                1.40

```



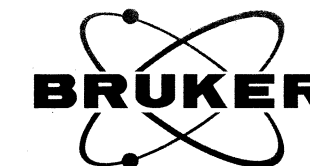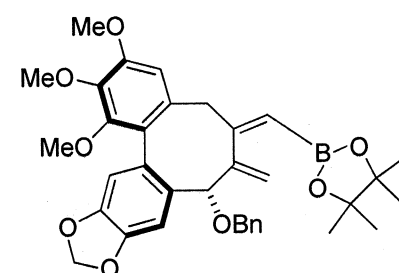

49

128.12  
127.34  
127.18  
109.46  
101.02  
83.08  
77.33  
77.01  
76.69  
70.04  
29.70  
24.92  
24.54

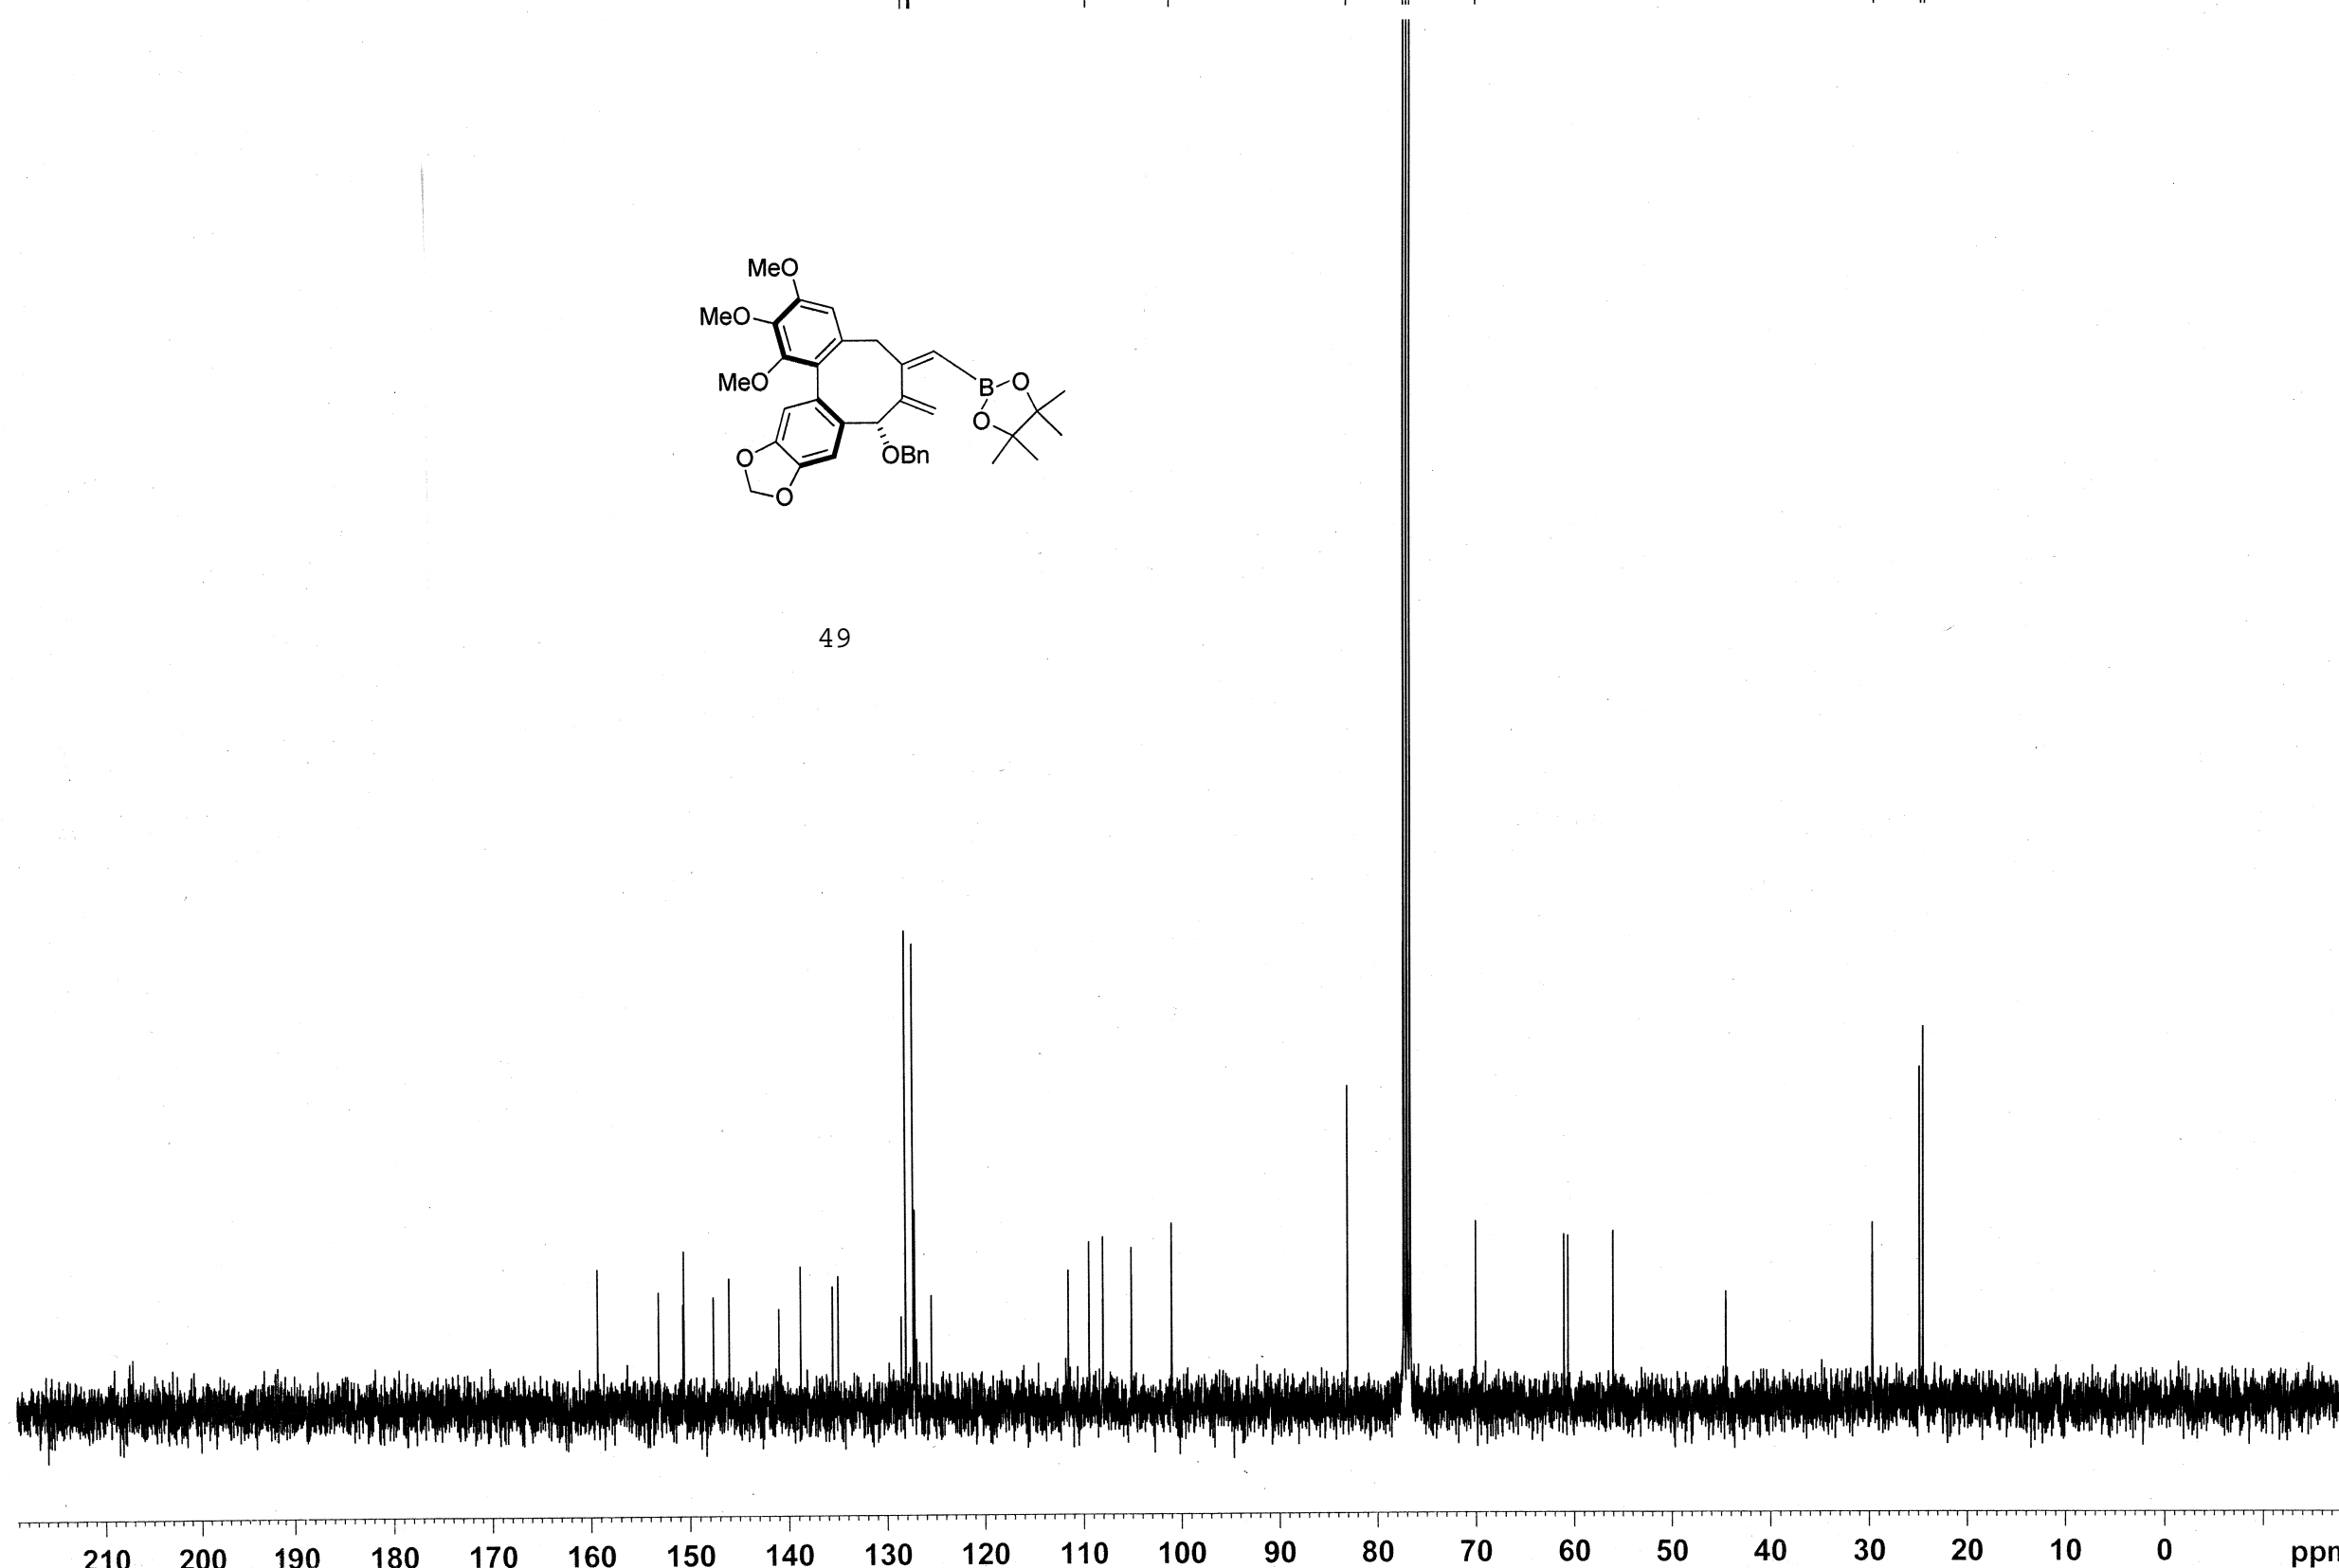

Current Data Parameters  
NAME Wgong-II-8 C13  
EXPNO 4  
PROCNO 1

F2 - Acquisition Parameters  
Date 20091119  
Time 12.37  
INSTRUM spect  
PROBHD 5 mm QNP 1H/13  
PULPROG zgpg30  
TD 65536  
SOLVENT CDCl3  
NS 347  
DS 4  
SWH 23980.814 Hz  
FIDRES 0.365918 Hz  
AQ 1.3664756 sec  
RG 2048  
DW 20.850 usec  
DE 6.00 usec  
TE 302.2 K  
D1 2.00000000 sec  
d11 0.03000000 sec  
DELTA 1.89999998 sec  
TD0 1

===== CHANNEL f1 =====  
NUC1 13C  
P1 10.50 usec  
PL1 0.00 dB  
SFO1 100.6228298 MHz

===== CHANNEL f2 =====  
CPDPRG2 waltz16  
NUC2 1H  
PCPD2 80.00 usec  
PL2 -6.00 dB  
PL12 14.56 dB  
PL13 16.50 dB  
SFO2 400.1316005 MHz

F2 - Processing parameters  
SI 32768  
SF 100.6127690 MHz  
WDW EM  
SSB 0  
LB 1.00 Hz  
GB 0  
PC 1.40

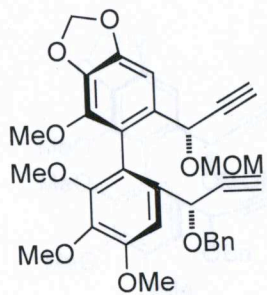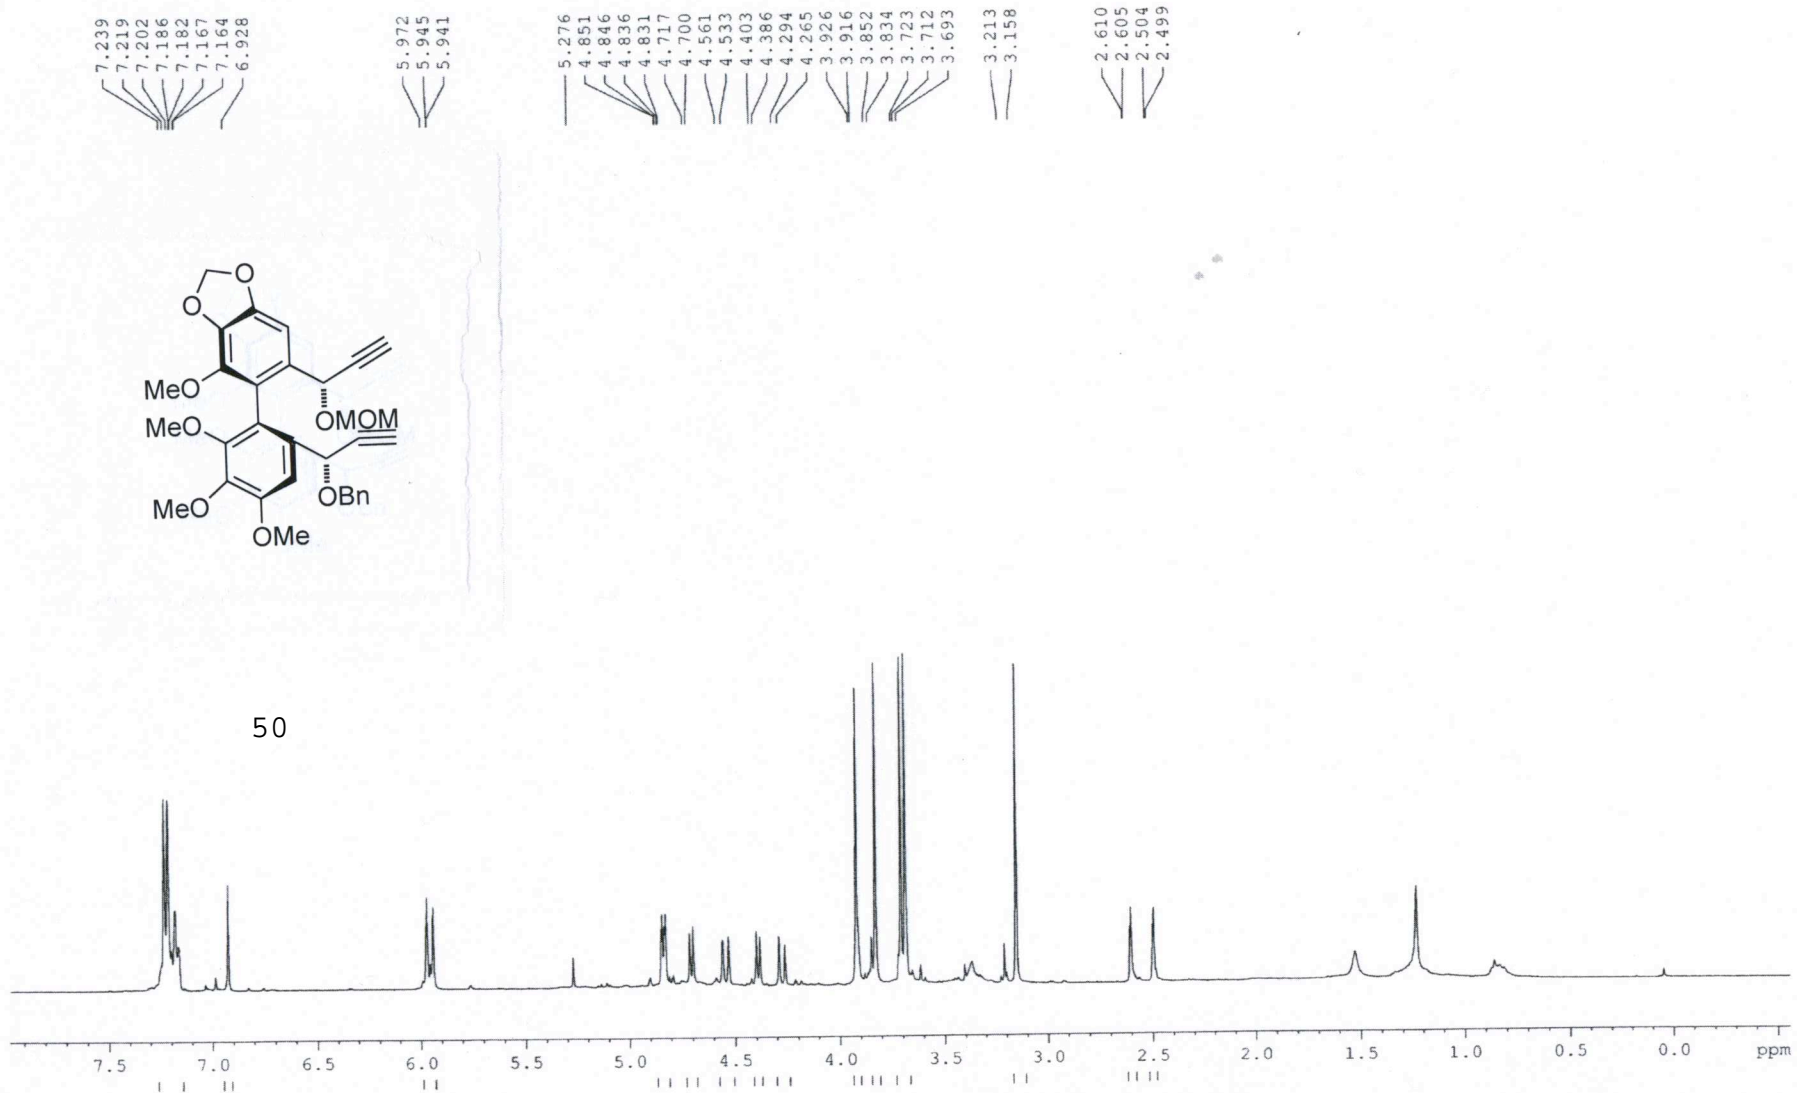



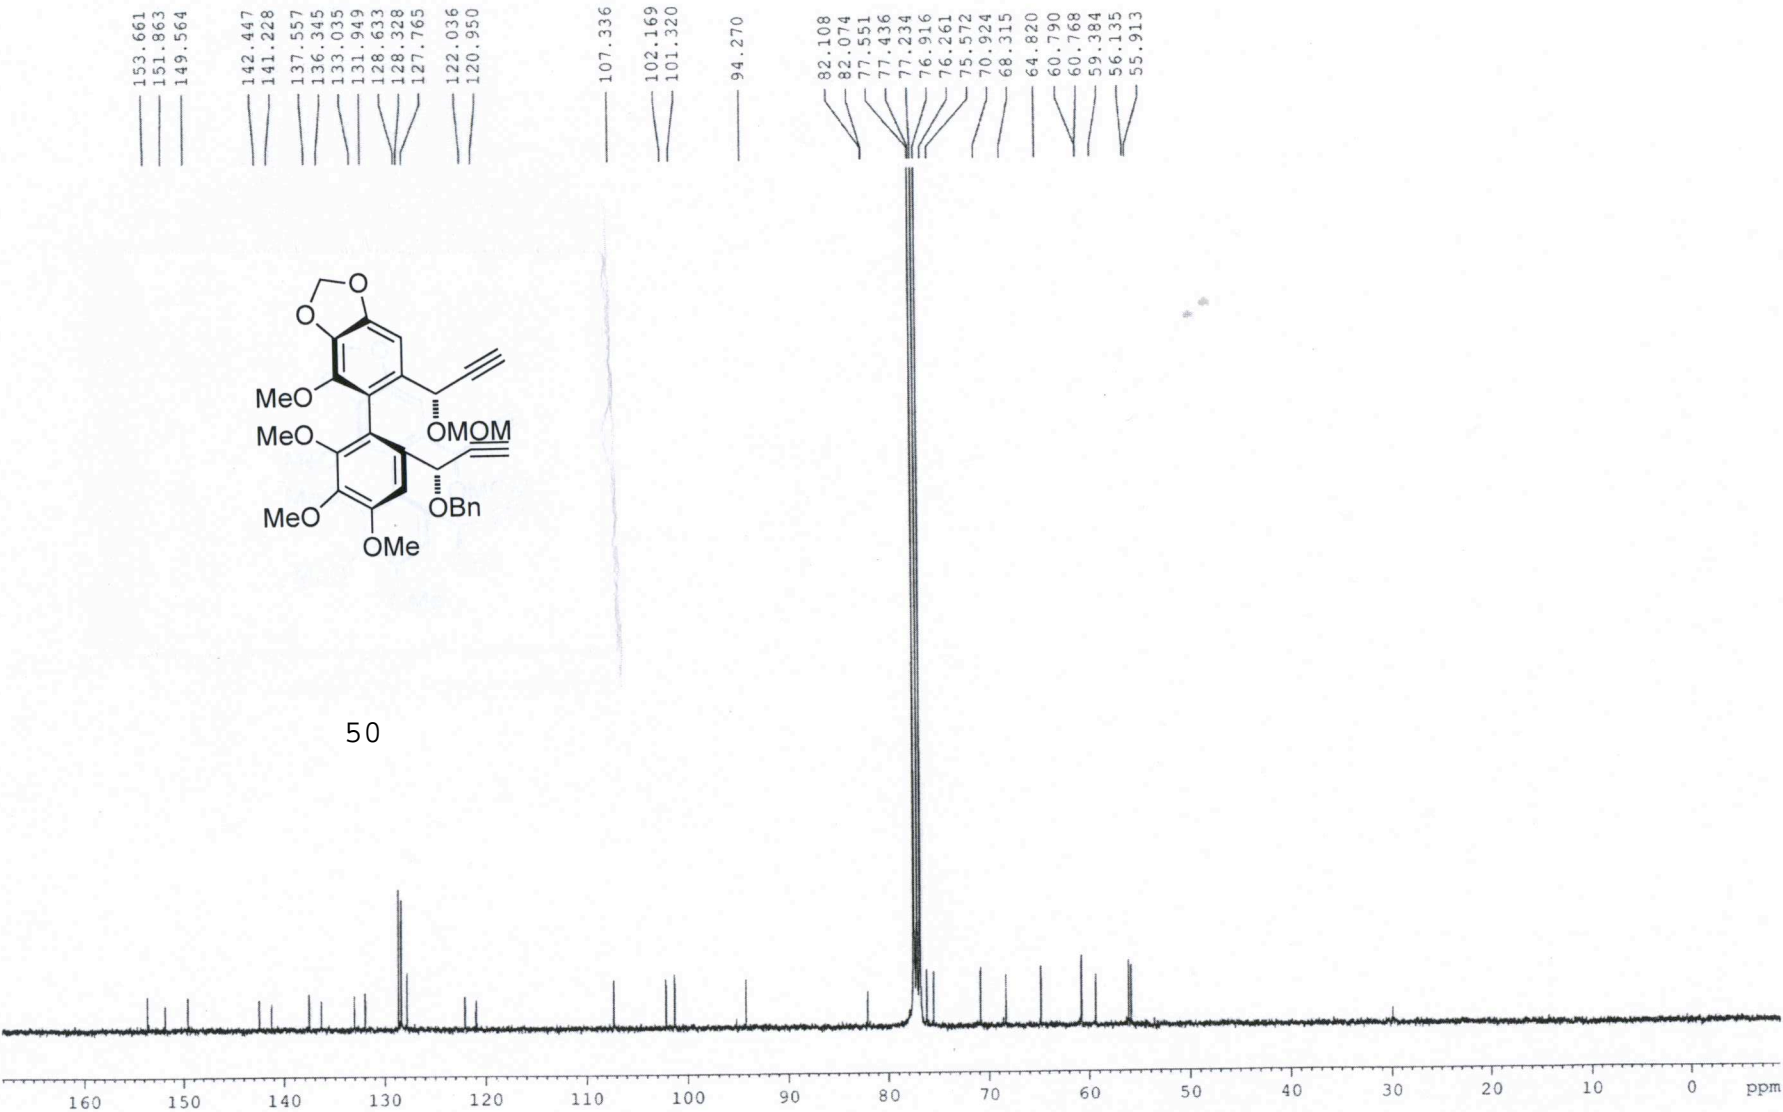

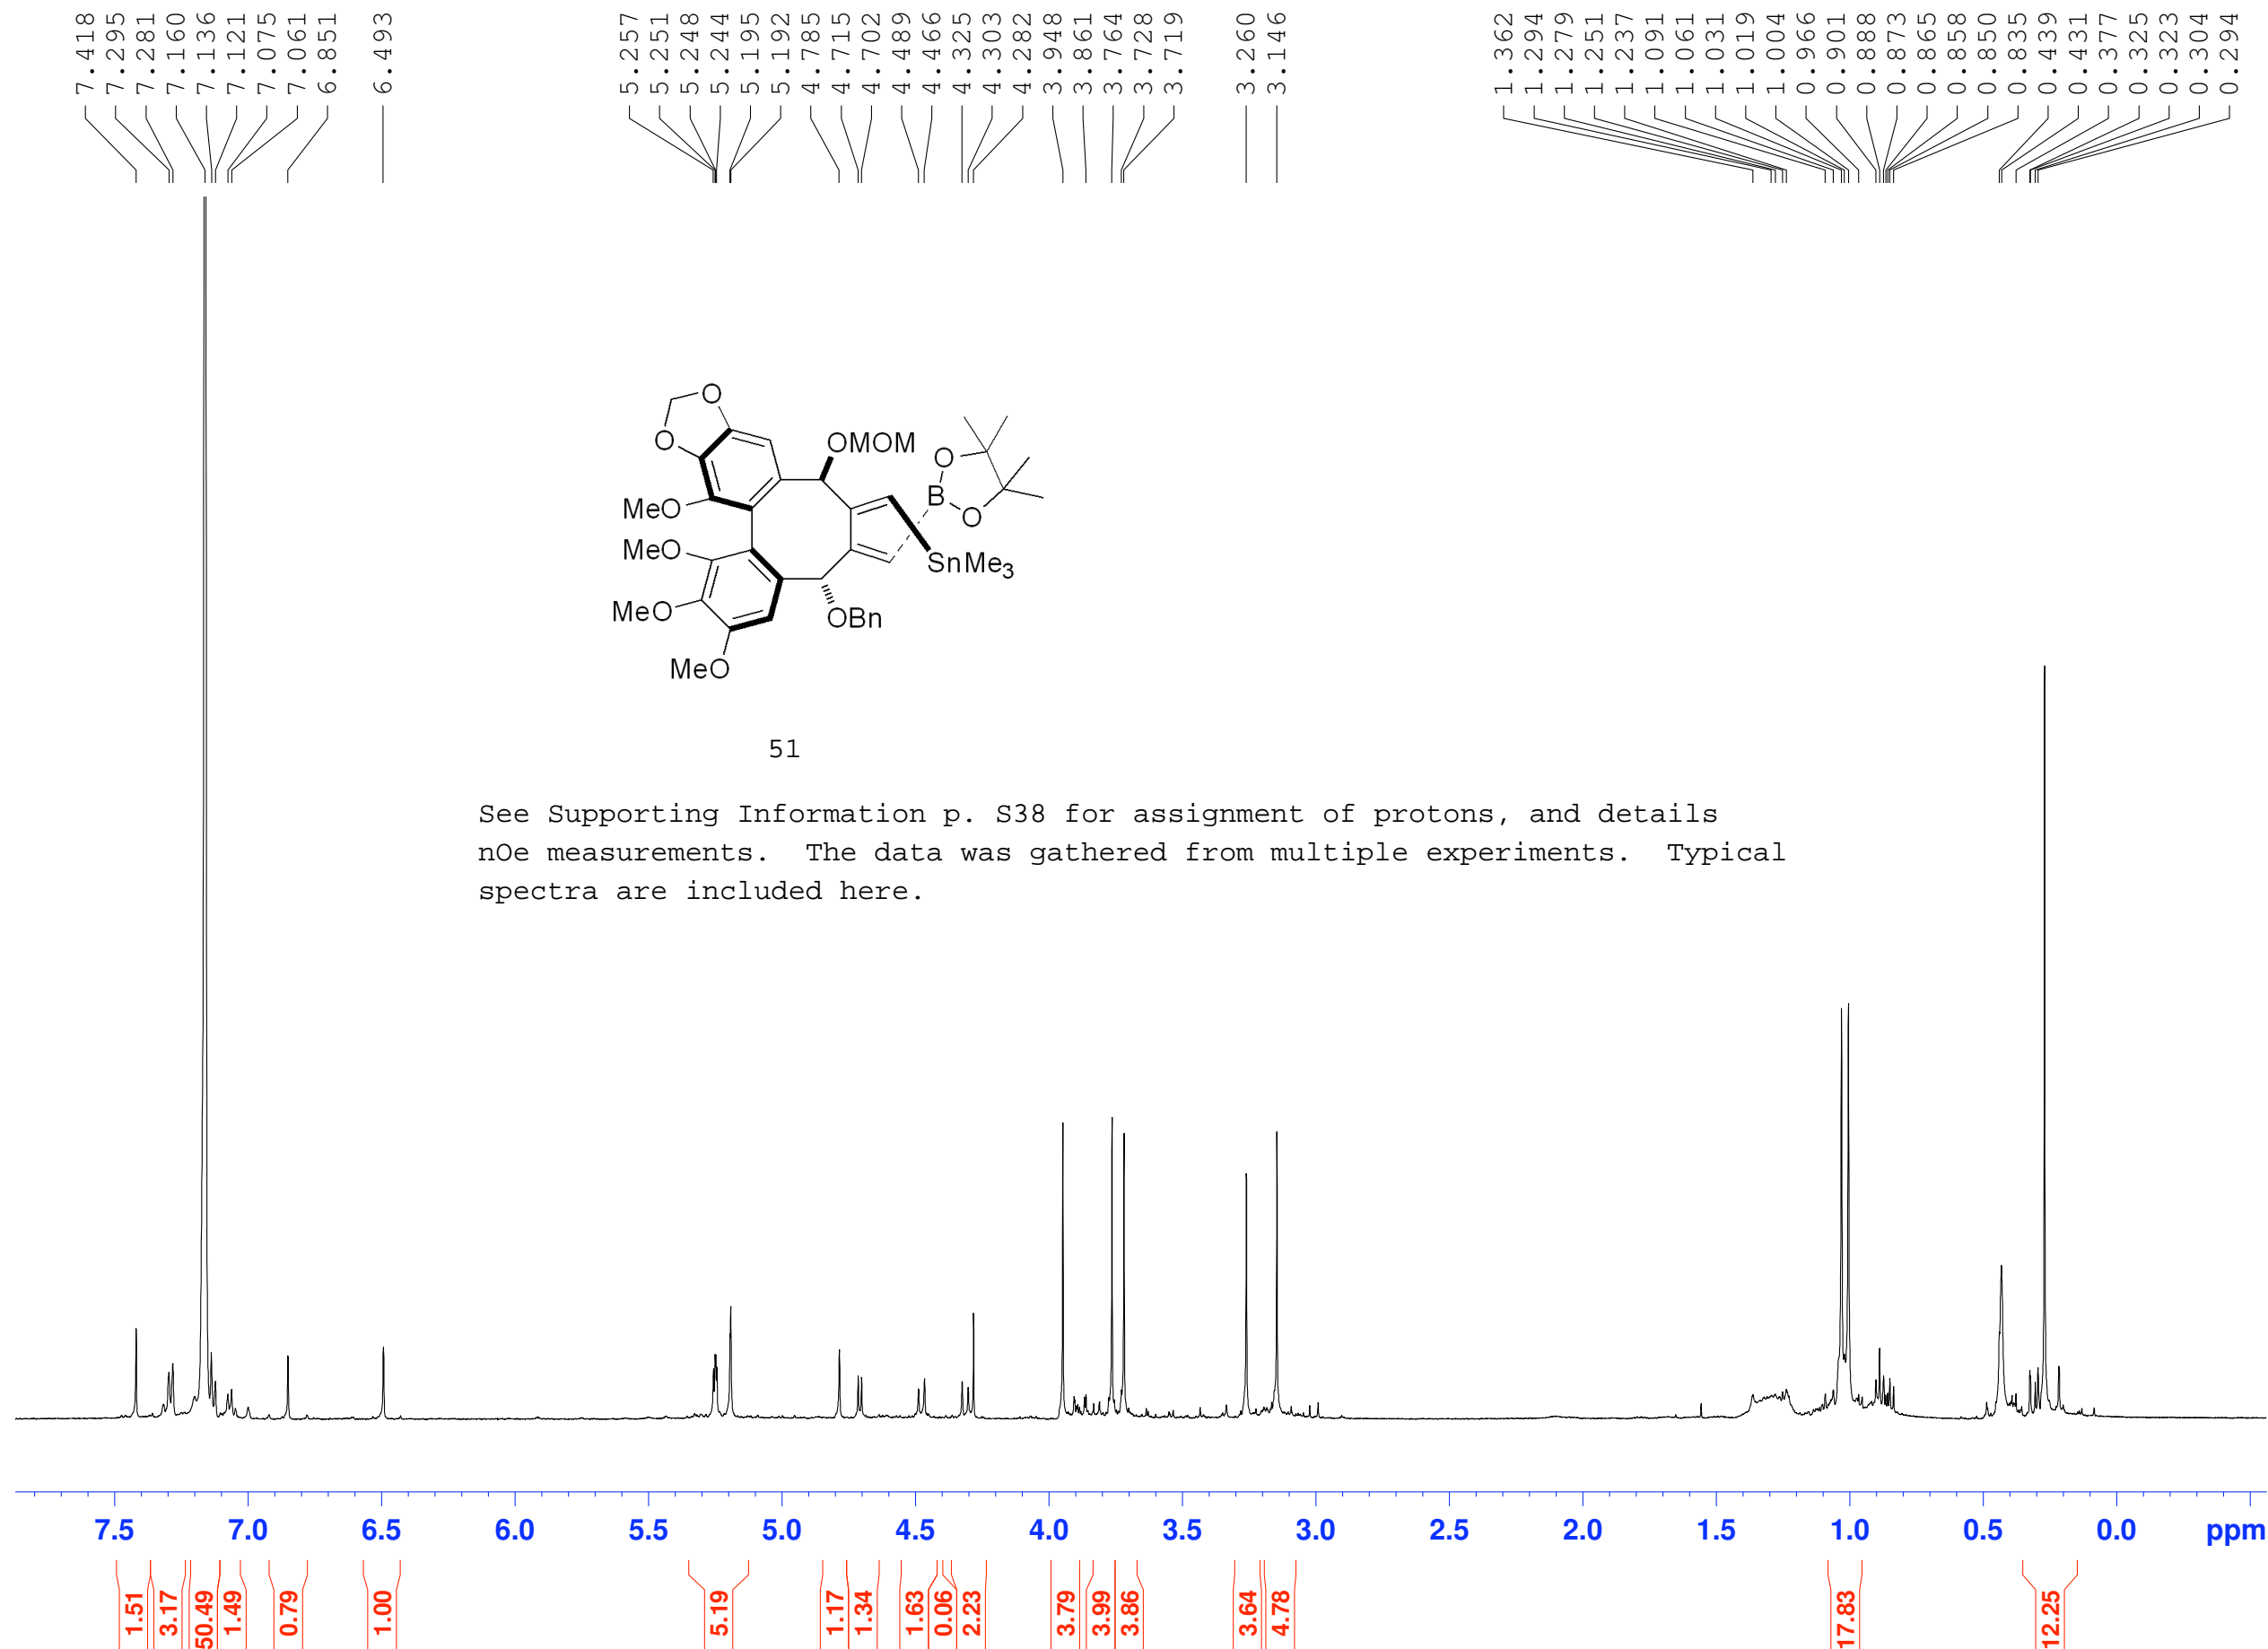

| Current Data | Parameters |
|--------------|------------|
| NAME         | Rs-6-187-3 |
| EXPNO        | 1          |
| PROCNO       | 1          |

```

F2 - Acquisition Parameters
Date_          20101122
Time           16.53
INSTRUM        spect
PROBHD         5 mm Multinucl
PULPROG        zg30
TD             65536
SOLVENT        C6D6
NS             16
DS             2
SWH            10330.578 Hz
FIDRES         0.157632 Hz
AQ            3.1719923 sec
RG            645.1
DW            48.400   used
DE            6.00    used
TE            300.2   K
D1            1.00000000 sec
MCREST        0.00000000 sec
MCWRK         0.01500000 sec

```

```
===== CHANNEL f1 =====
NUC1                      1H
P1                        17.33 usec
PL1                       -1.00 dB
SFO1                     500.0230878 MHz
```

```
F2 - Processing parameters
SI                32768
SF                500.0200550 MHz
WDW               EM
SSB               0
LB                0.30 Hz
GB                0
PC                1.40
```

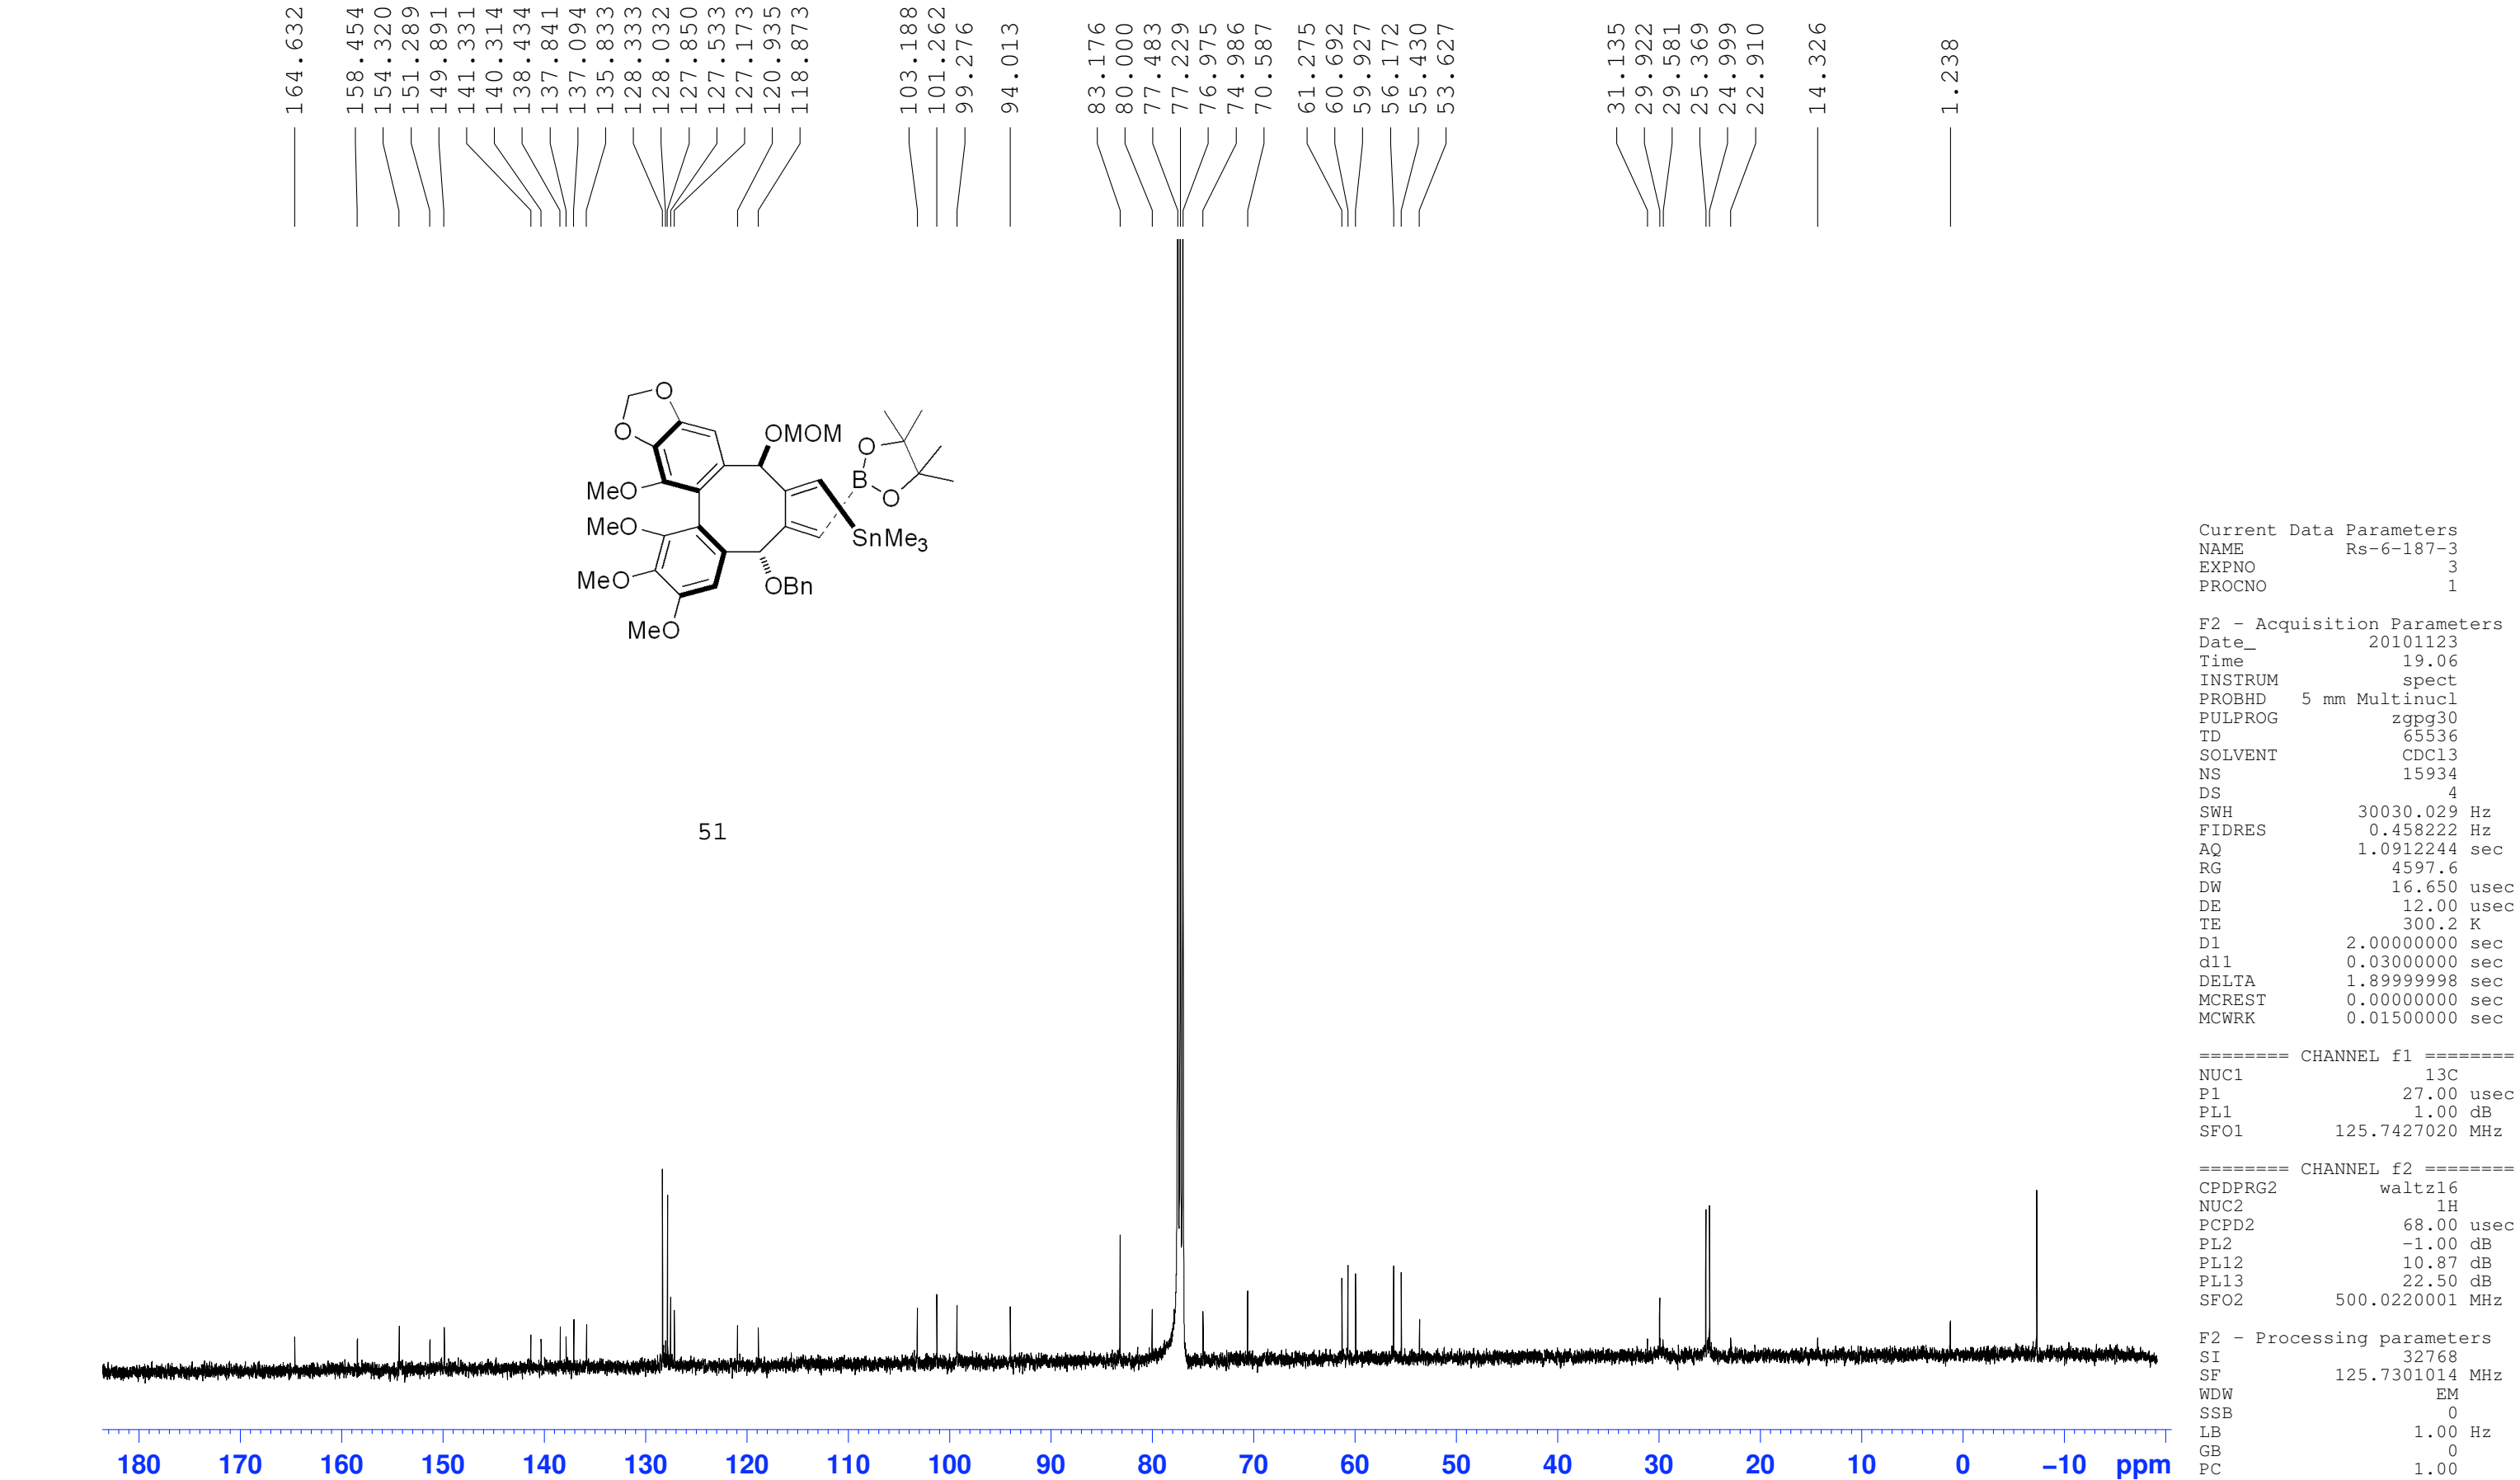

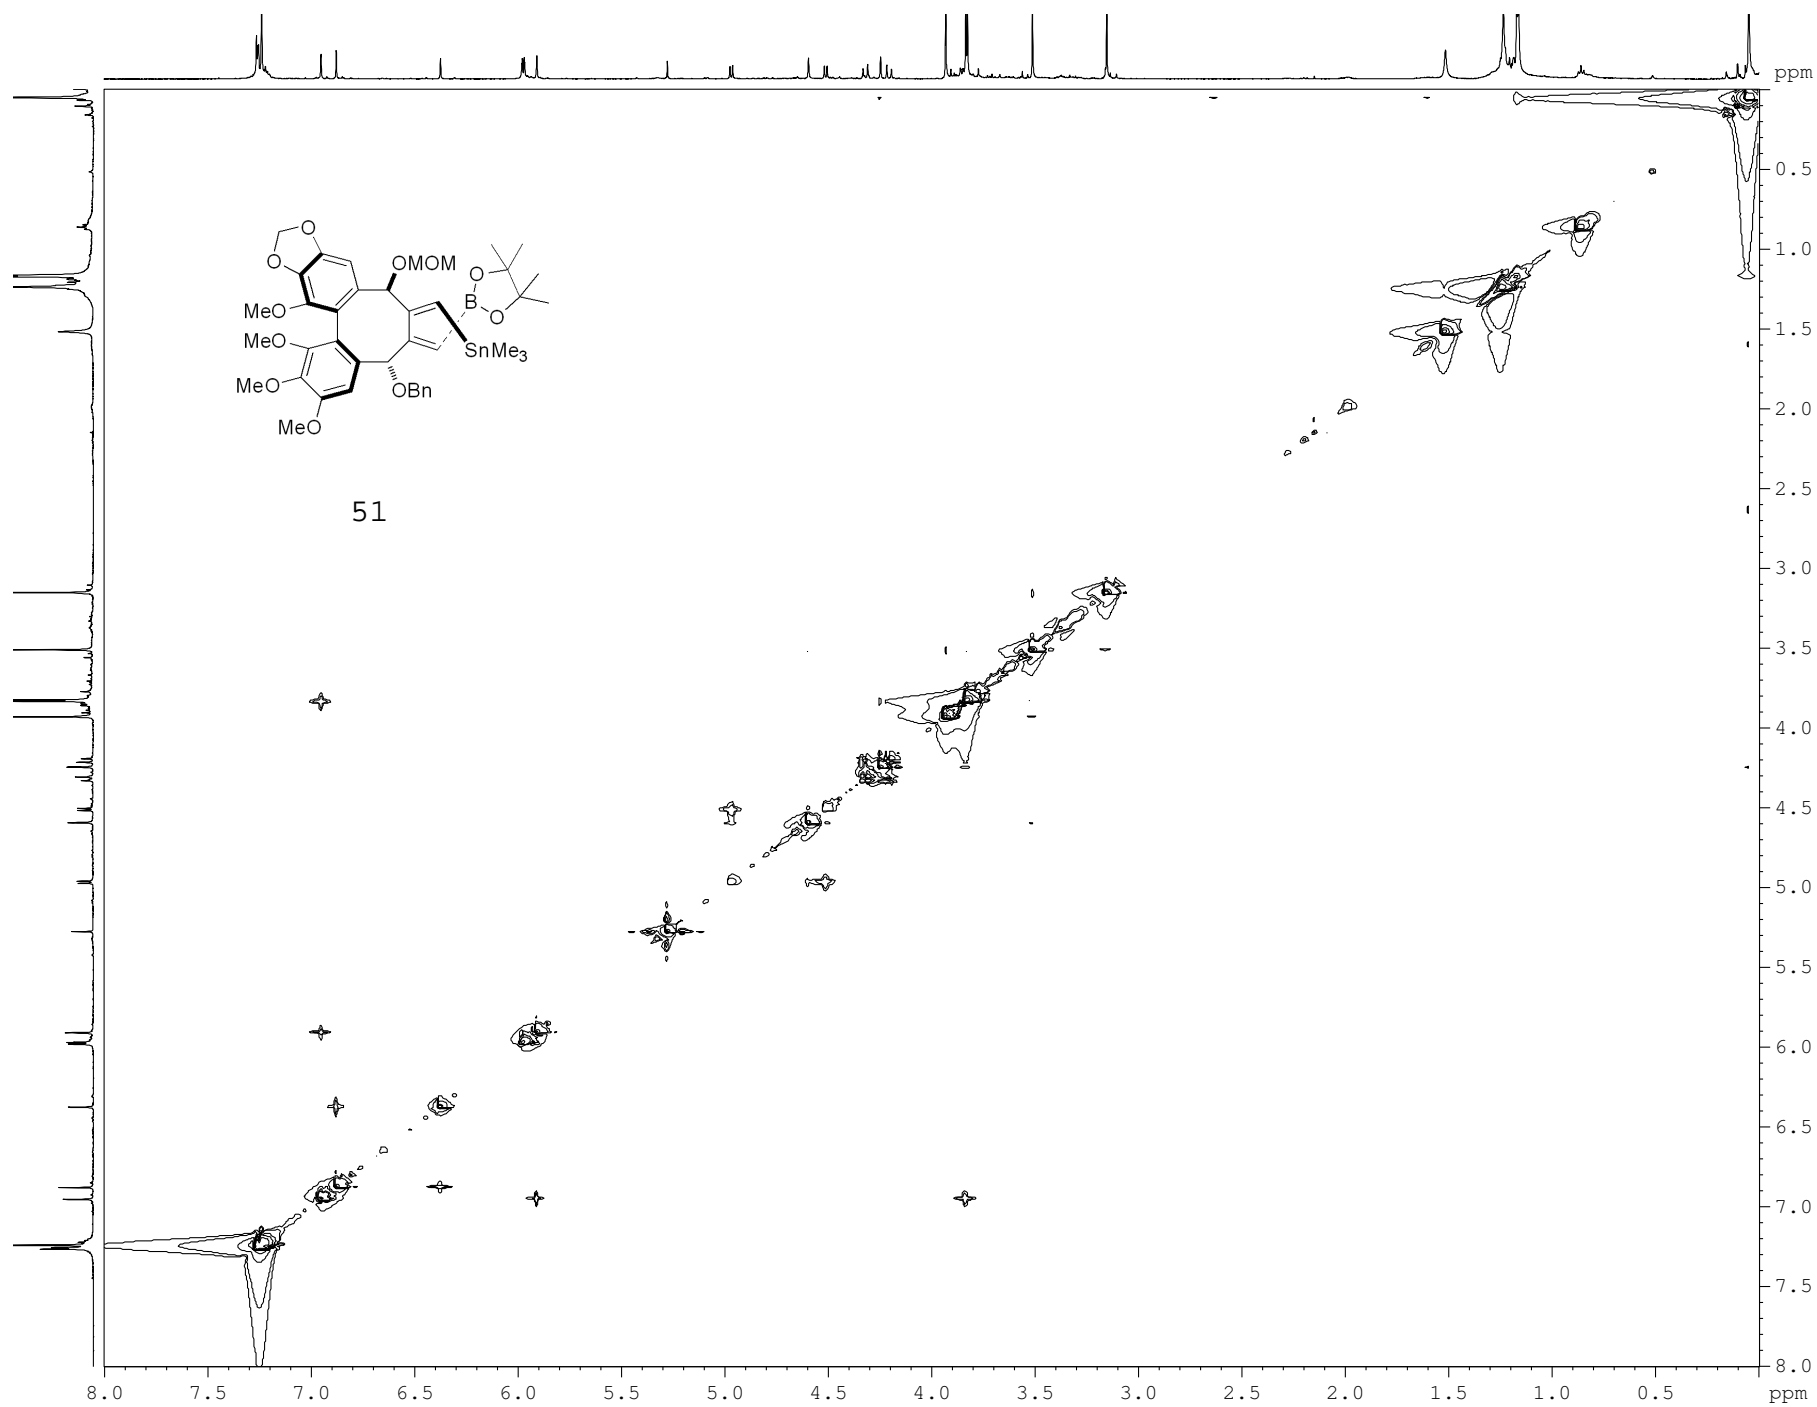

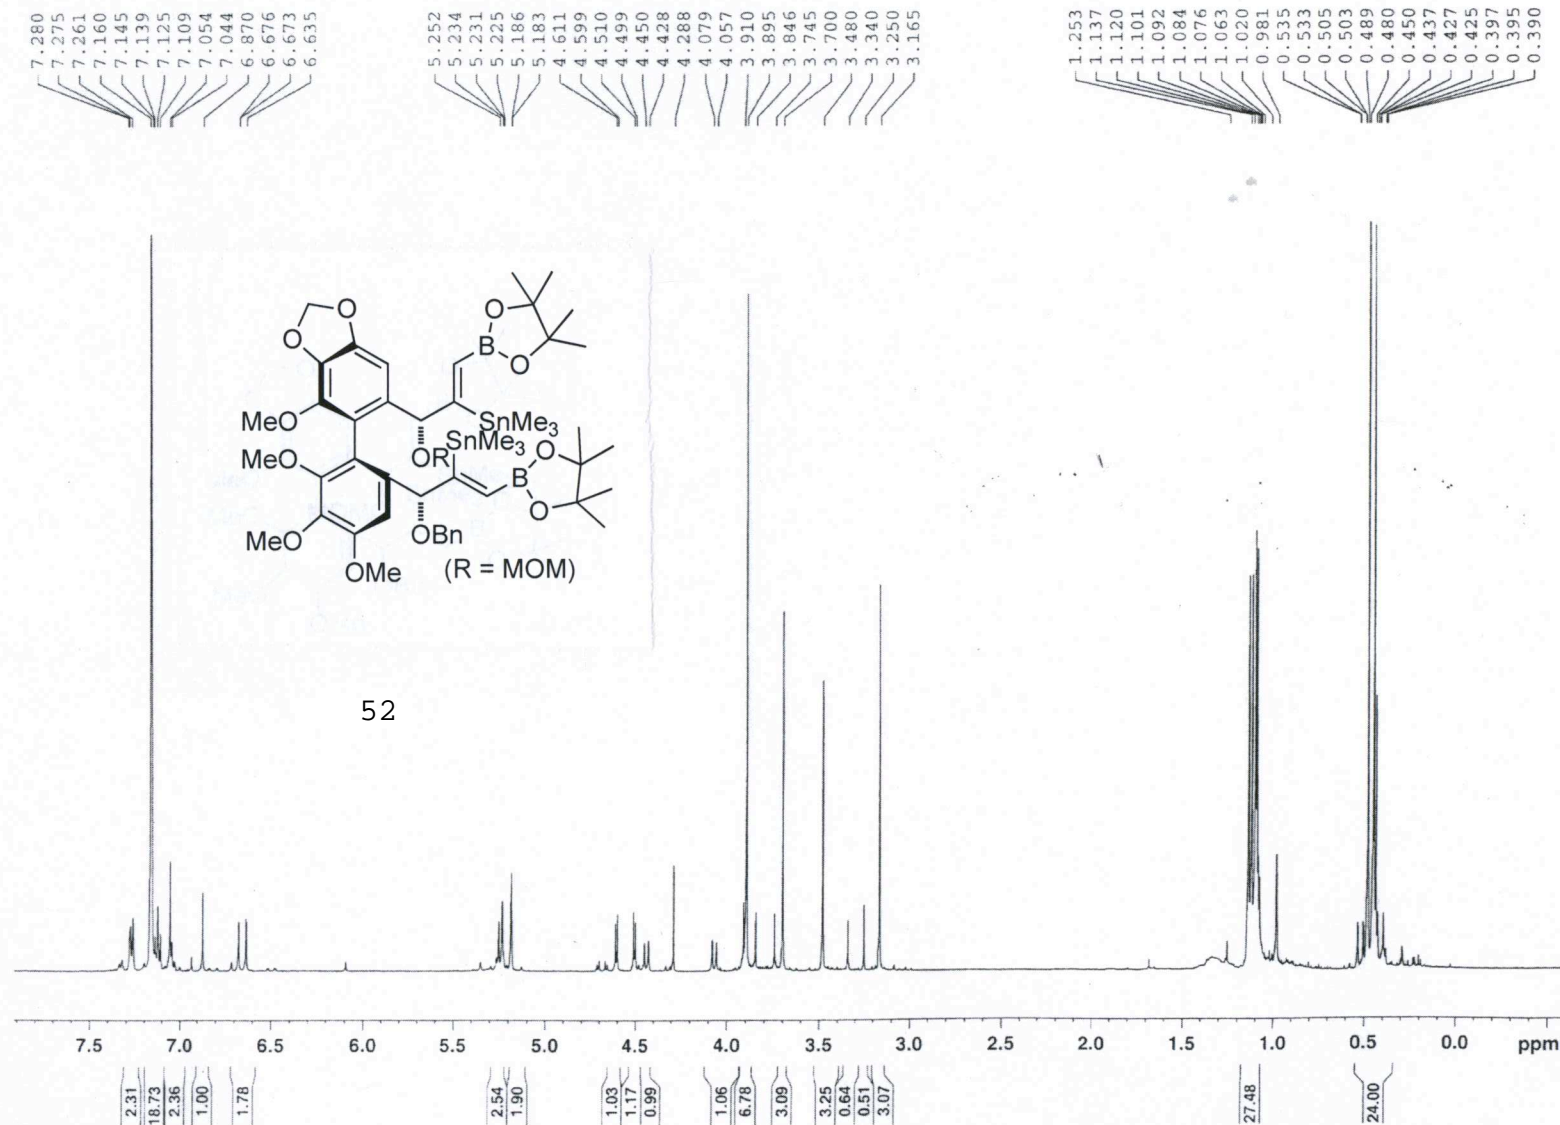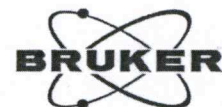

Current Data Parameters  
NAME Rs-6-187-1  
EXPNO 1  
PROCNO 1

F2 - Acquisition Parameters  
Date\_ 20101123  
Time 14.15  
INSTRUM spect  
PROBHD 5 mm Multinucl  
PULPROG zg30  
TD 65536  
SOLVENT C6D6  
NS 16  
DS 2  
SWH 10330.578 Hz  
FIDRES 0.157632 Hz  
AQ 3.1719923 sec  
RG 287.4  
DW 48.400 usec  
DE 6.00 usec  
TE 300.2 K  
D1 1.00000000 sec  
MCREST 0.00000000 sec  
MCWRK 0.01500000 sec

===== CHANNEL f1 =====  
NUC1 1H  
P1 17.33 usec  
PL1 -1.00 dB  
SFO1 500.0230878 MHz

F2 - Processing parameters  
SI 32768  
SF 500.0200550 MHz  
WDW EM  
SSB 0  
LB 0.30 Hz  
GB 0  
PC 1.00

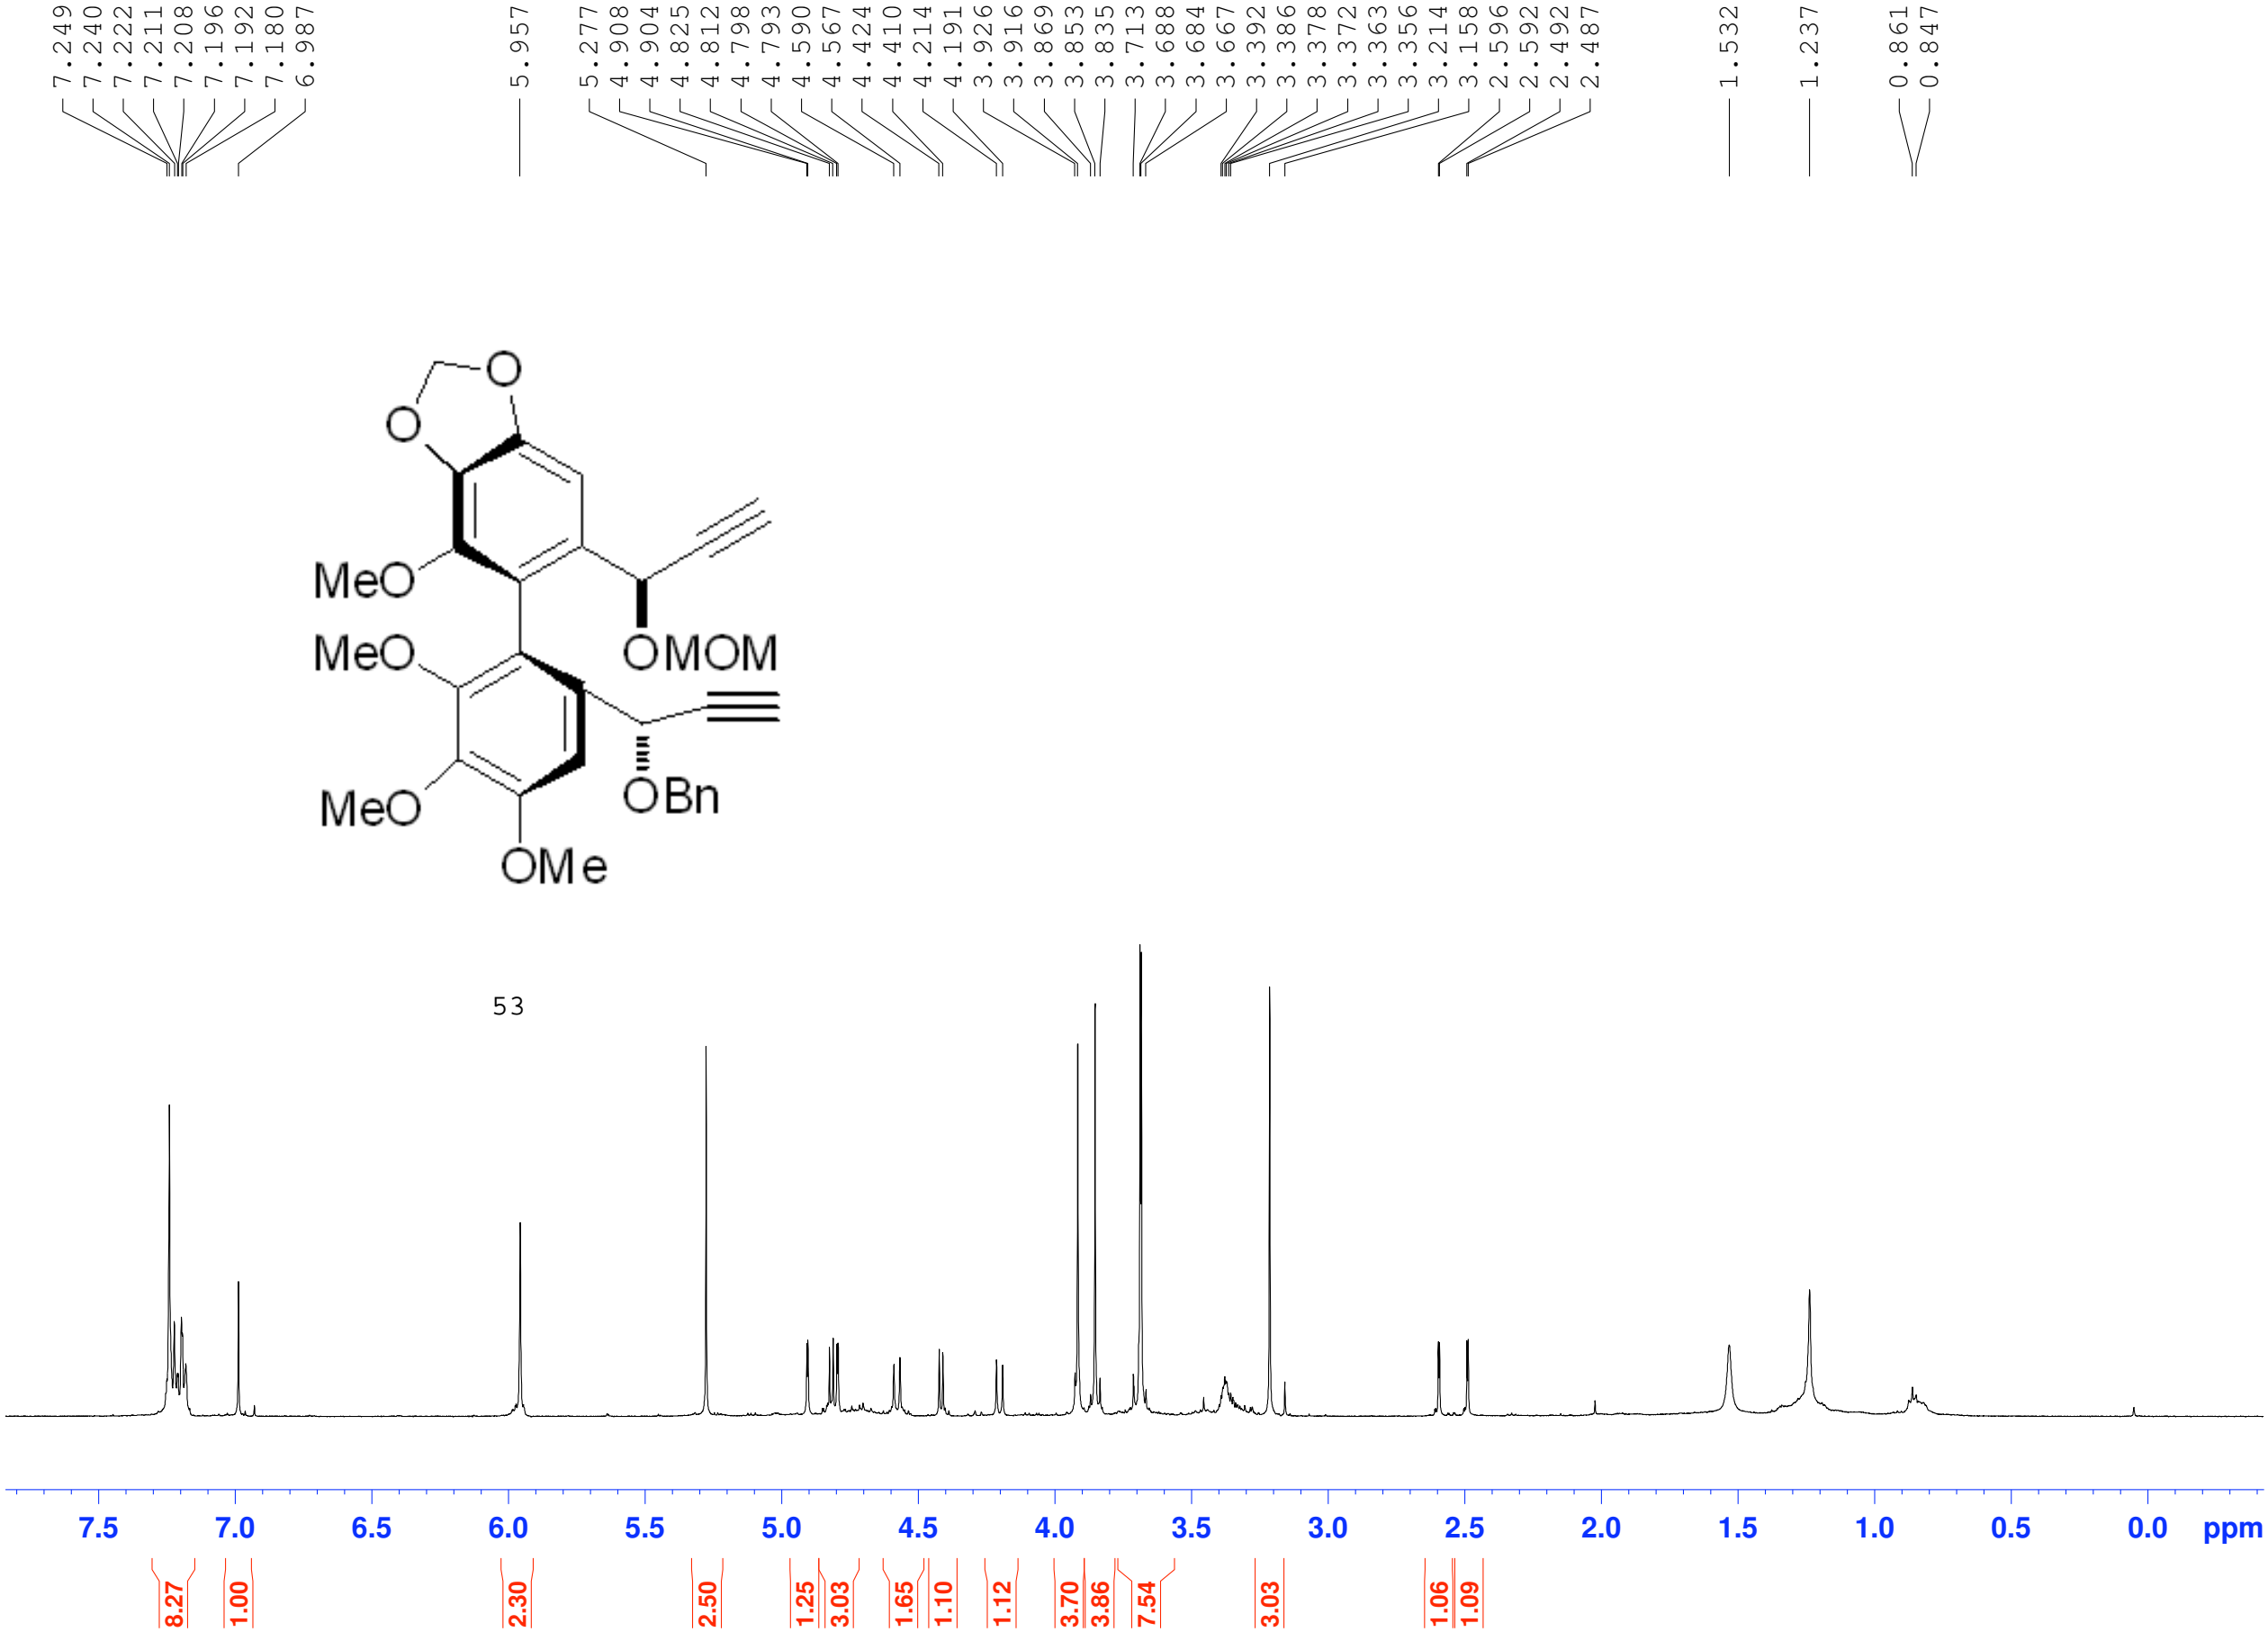

Current Data Parameters  
NAME Rs-6-188  
EXPNO 1  
PROCNO 1

F2 - Acquisition Parameters  
Date\_ 20101122  
Time 13.58  
INSTRUM spect  
PROBHD 5 mm Multinucl  
PULPROG zg30  
TD 65536  
SOLVENT CDCl3  
NS 16  
DS 2  
SWH 10330.578 Hz  
FIDRES 0.157632 Hz  
AQ 3.1719923 sec  
RG 80.6  
DW 48.400 usec  
DE 6.00 usec  
TE 300.2 K  
D1 1.00000000 sec  
MCREST 0.00000000 sec  
MCWRK 0.01500000 sec

===== CHANNEL f1 =====  
NUC1 1H  
P1 17.33 usec  
PL1 -1.00 dB  
SFO1 500.0230878 MHz

F2 - Processing parameters  
SI 32768  
SF 500.0200216 MHz  
WDW EM  
SSB 0  
LB 0.30 Hz  
GB 0  
PC 1.00

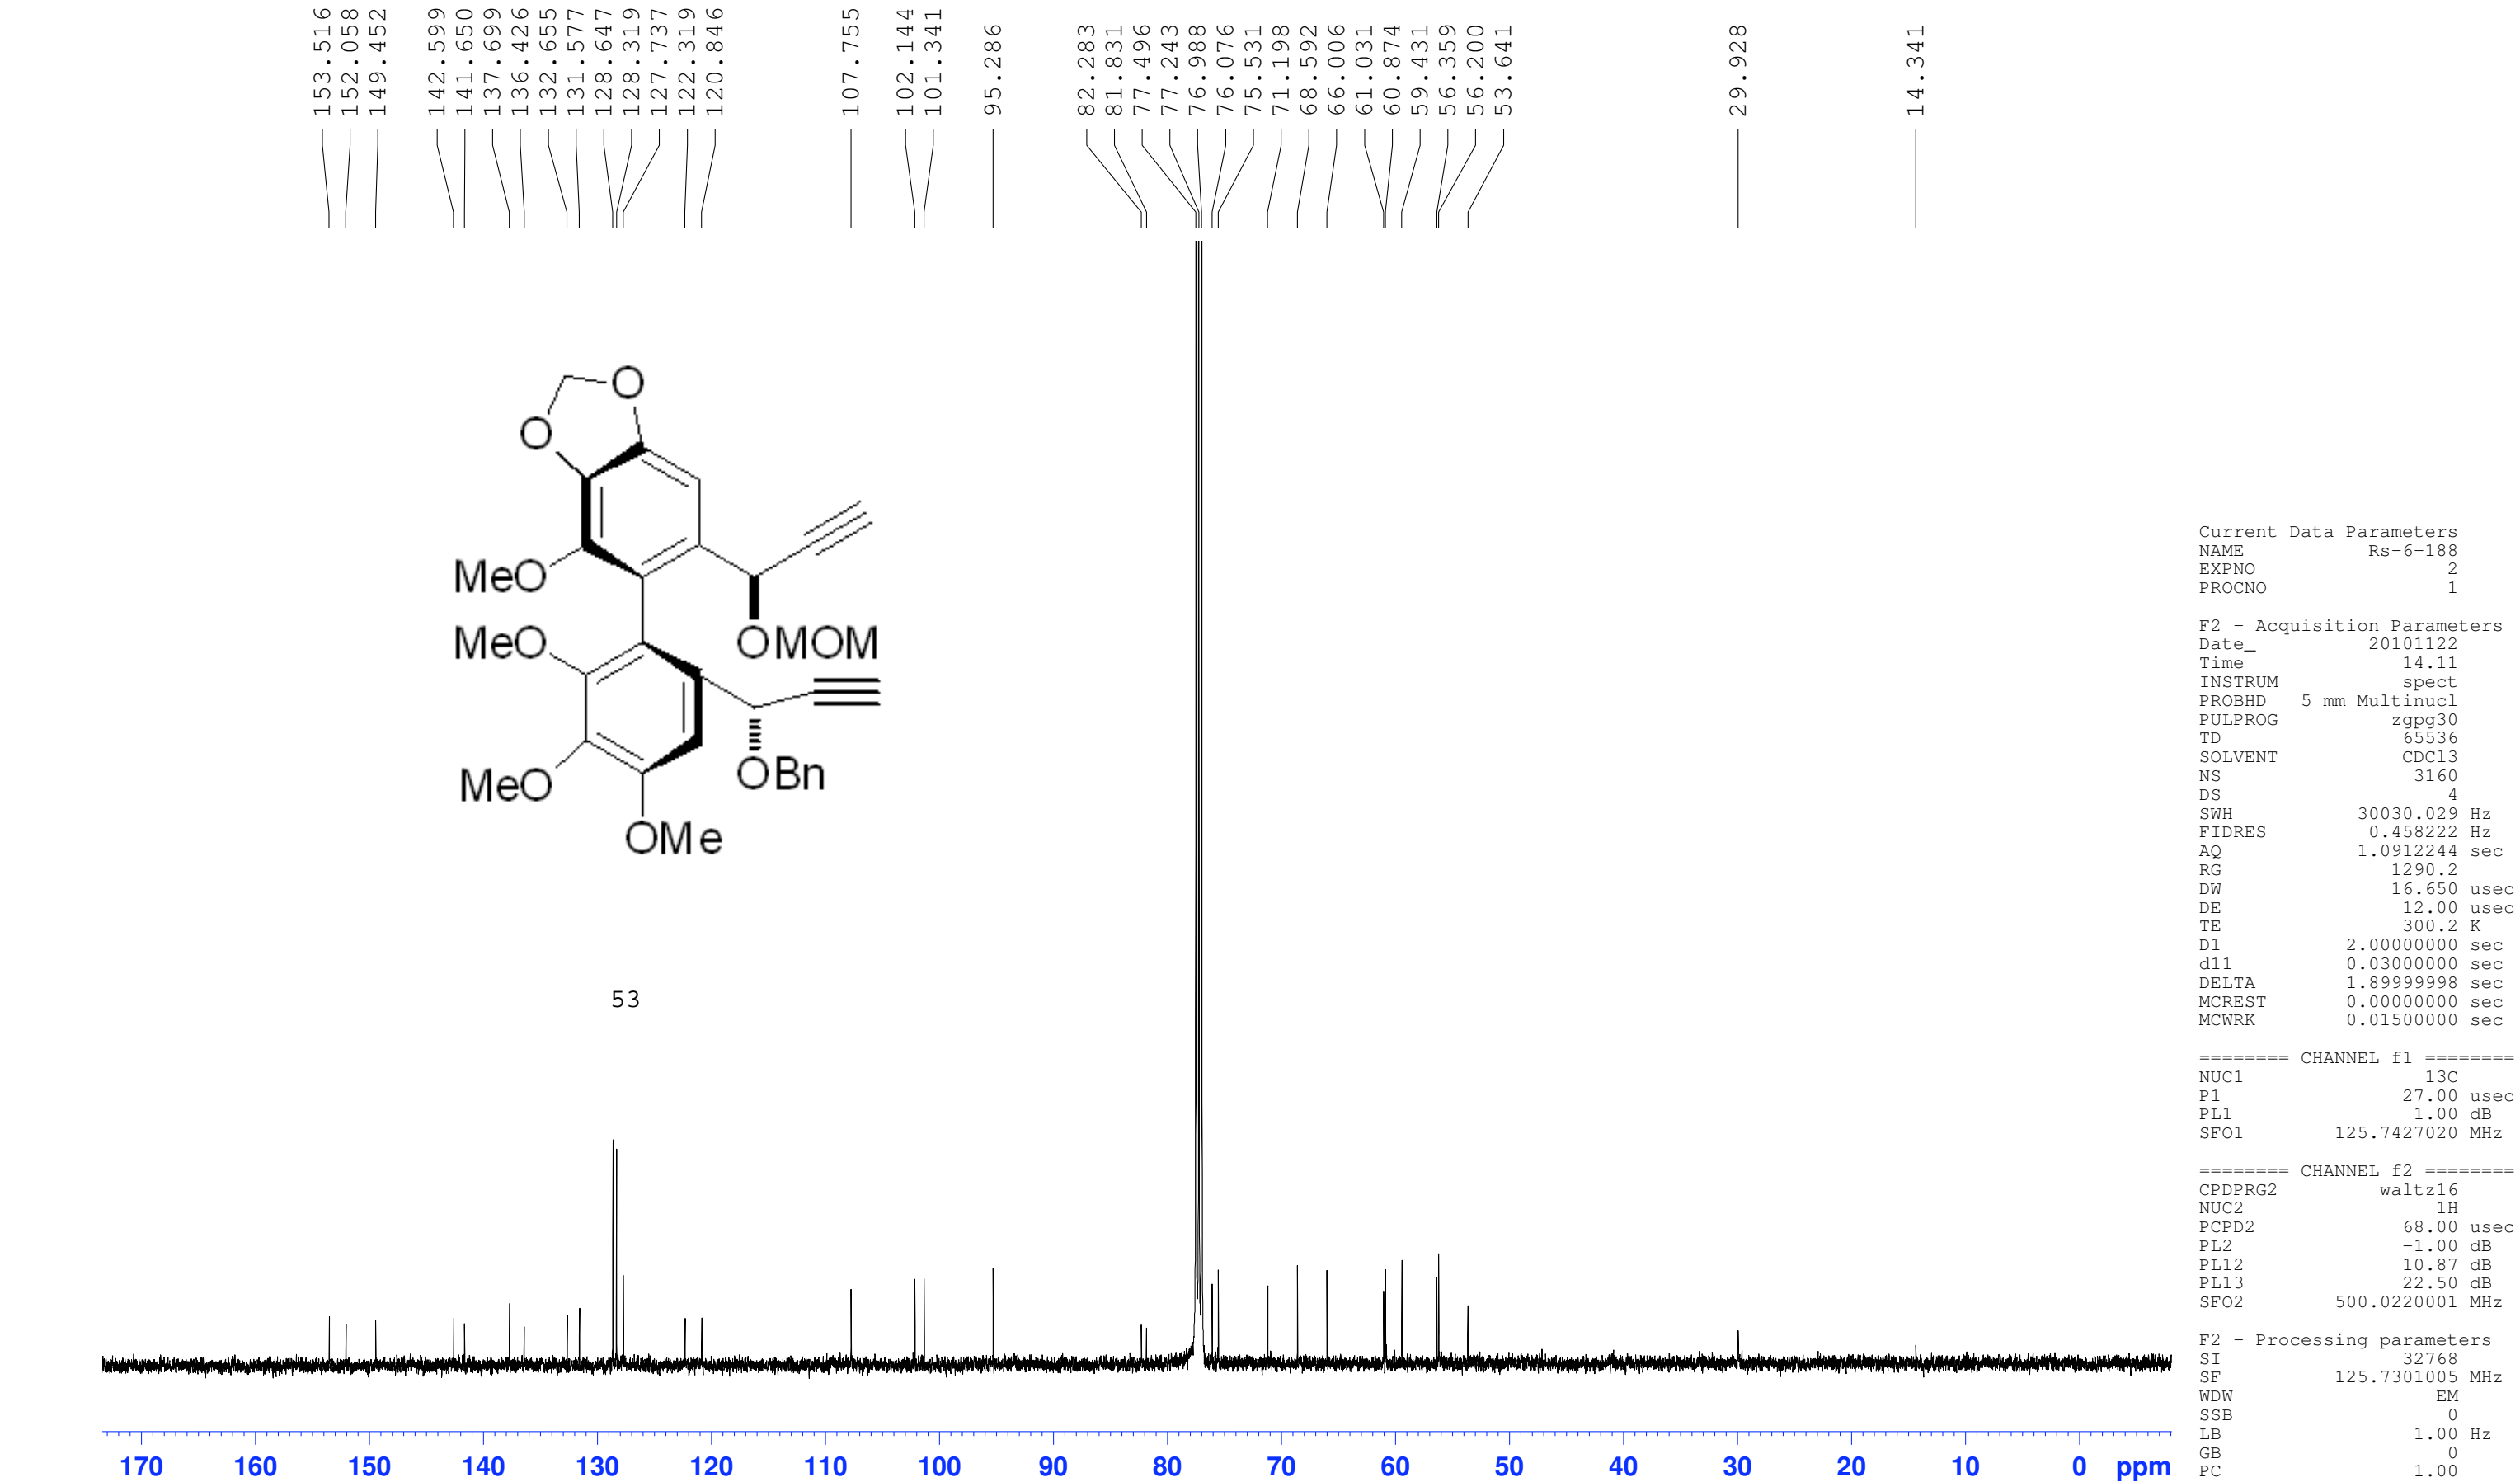



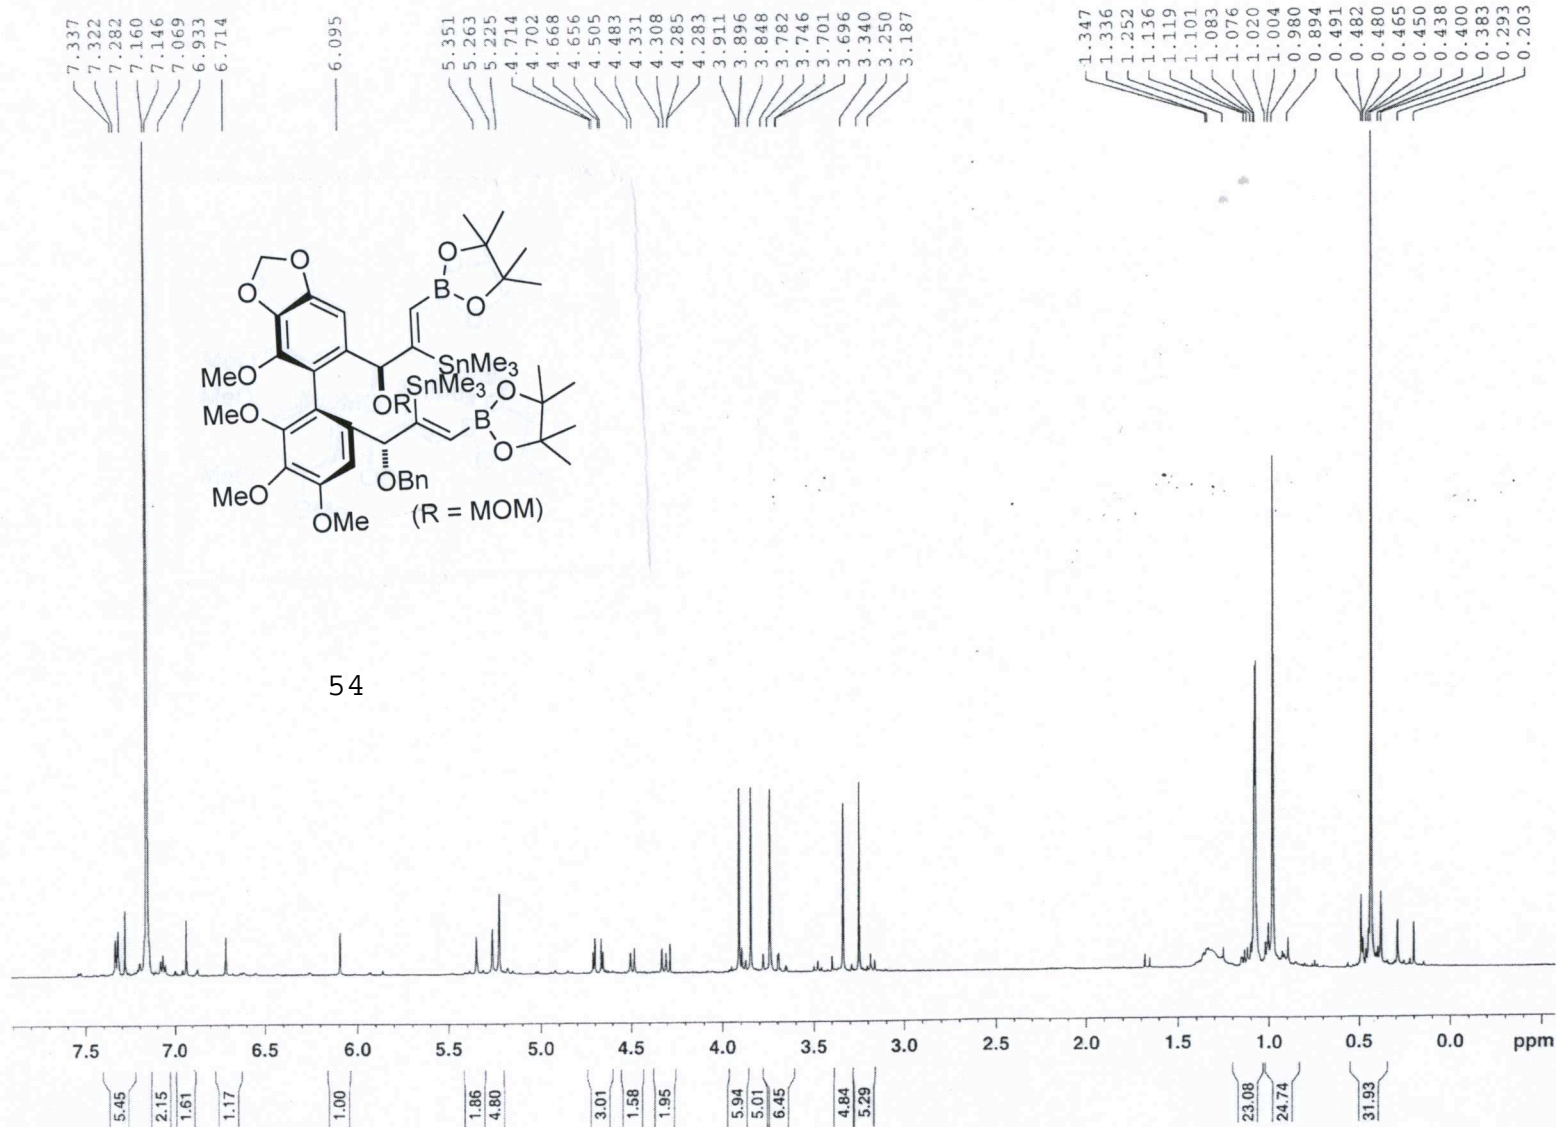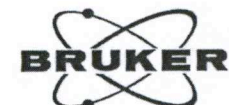

Current Data Parameters  
NAME Rs-6-189-p  
EXPNO 3  
PROCNO 1

F2 - Acquisition Parameters  
Date\_ 20101123  
Time 14.09  
INSTRUM spect  
PROBHD 5 mm Multinucl  
PULPROG zg30  
TD 65536  
SOLVENT C6D6  
NS 16  
DS 2  
SWH 10330.578 Hz  
FIDRES 0.157632 Hz  
AQ 3.1719923 sec  
RG 287.4  
DW 48.400 usec  
DE 6.00 usec  
TE 300.2 K  
D1 1.00000000 sec  
MCREST 0.00000000 sec  
MCWRK 0.01500000 sec

===== CHANNEL f1 =====  
NUC1 1H  
P1 17.33 usec  
PL1 -1.00 dB  
SFO1 500.0230878 MHz

F2 - Processing parameters  
SI 32768  
SF 500.0200553 MHz  
WDW EM  
SSB 0  
LB 0.30 Hz  
GB 0  
PC 1.00



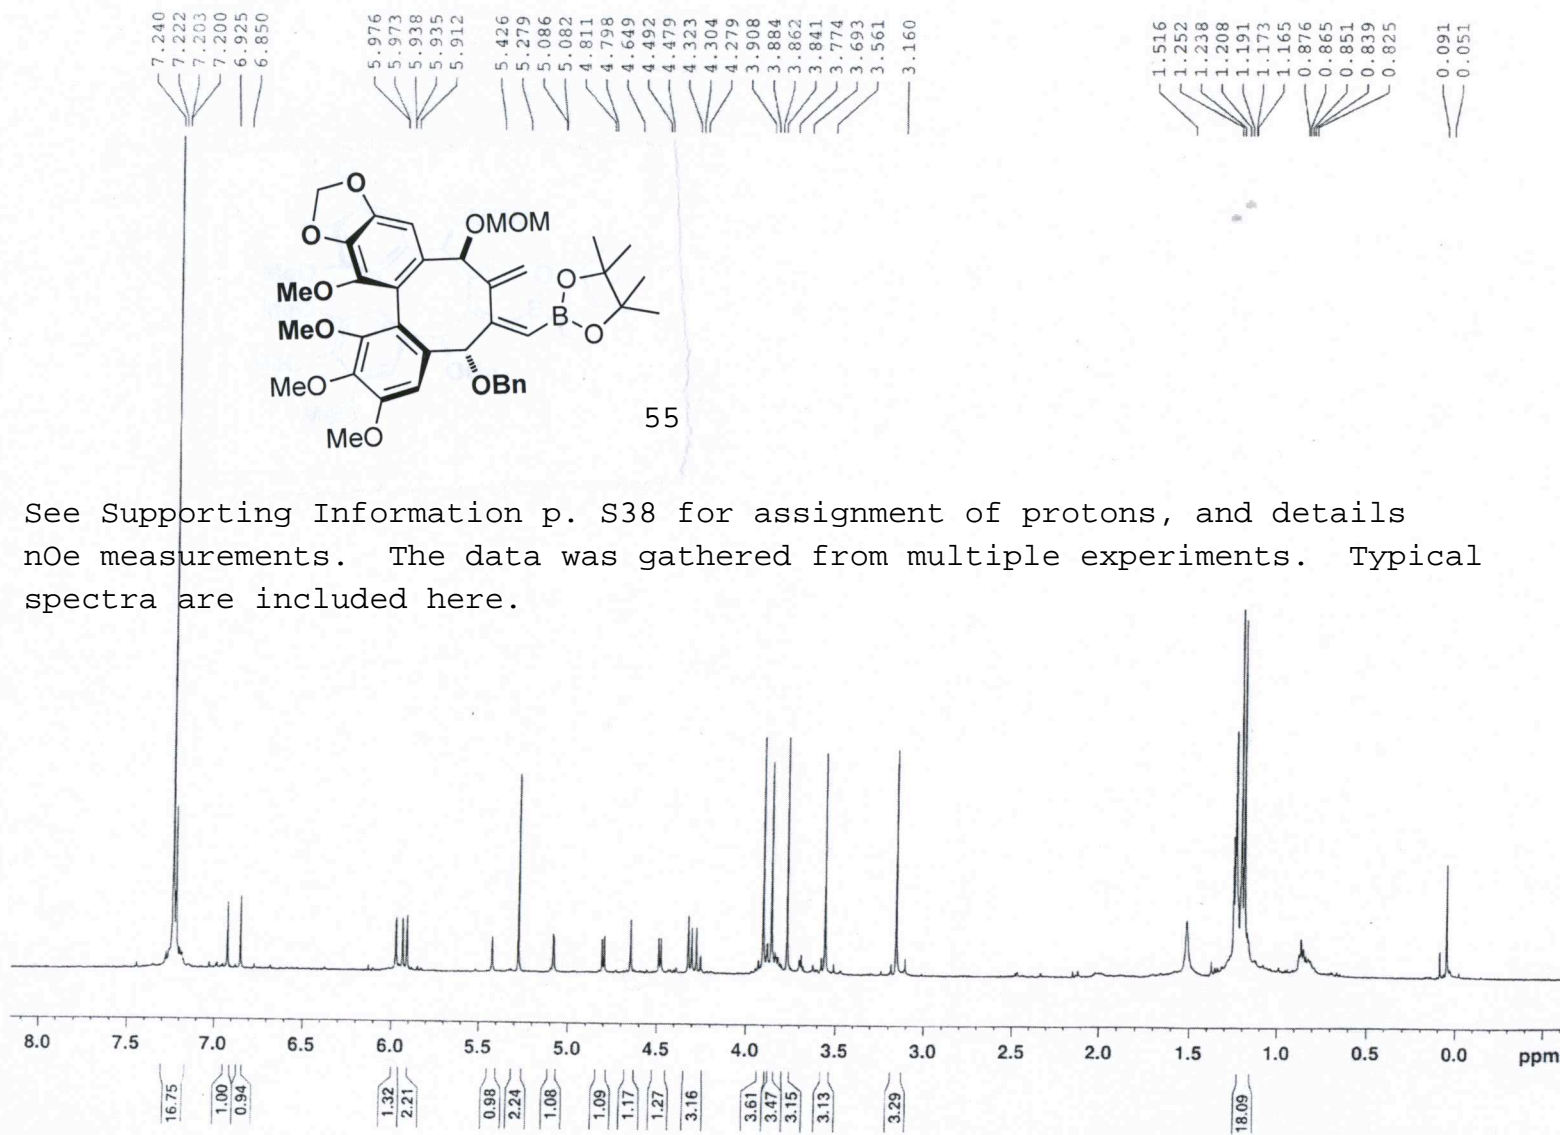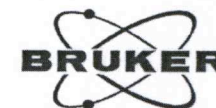

Current Data Parameters  
NAME Rs-2-152  
EXPNO 7  
PROCNO 1

F2 - Acquisition Parameters  
Date\_ 20080225  
Time 21.37  
INSTRUM spect  
PROBHD 5 mm Multinucl  
PULPROG zg30  
TD 65536  
SOLVENT CDCl3  
NS 16  
DS 2  
SWH 10330.578 Hz  
FIDRES 0.157632 Hz  
AQ 3.1719923 sec  
RG 645.1  
DW 48.400 usec  
DE 6.00 usec  
TE 300.2 K  
D1 1.00000000 sec  
MCREST 0.00000000 sec  
MCWRK 0.01500000 sec

===== CHANNEL f1 =====  
NUC1 1H  
P1 14.80 usec  
PL1 -1.00 dB  
SFO1 500.0230878 MHz

F2 - Processing parameters  
SI 32768  
SF 500.0200216 MHz  
WDW EM  
SSB 0  
LB 0.30 Hz  
GB 0  
PC 1.40

See Supporting Information p. S38 for assignment of protons, and details nOe measurements. The data was gathered from multiple experiments. Typical spectra are included here.

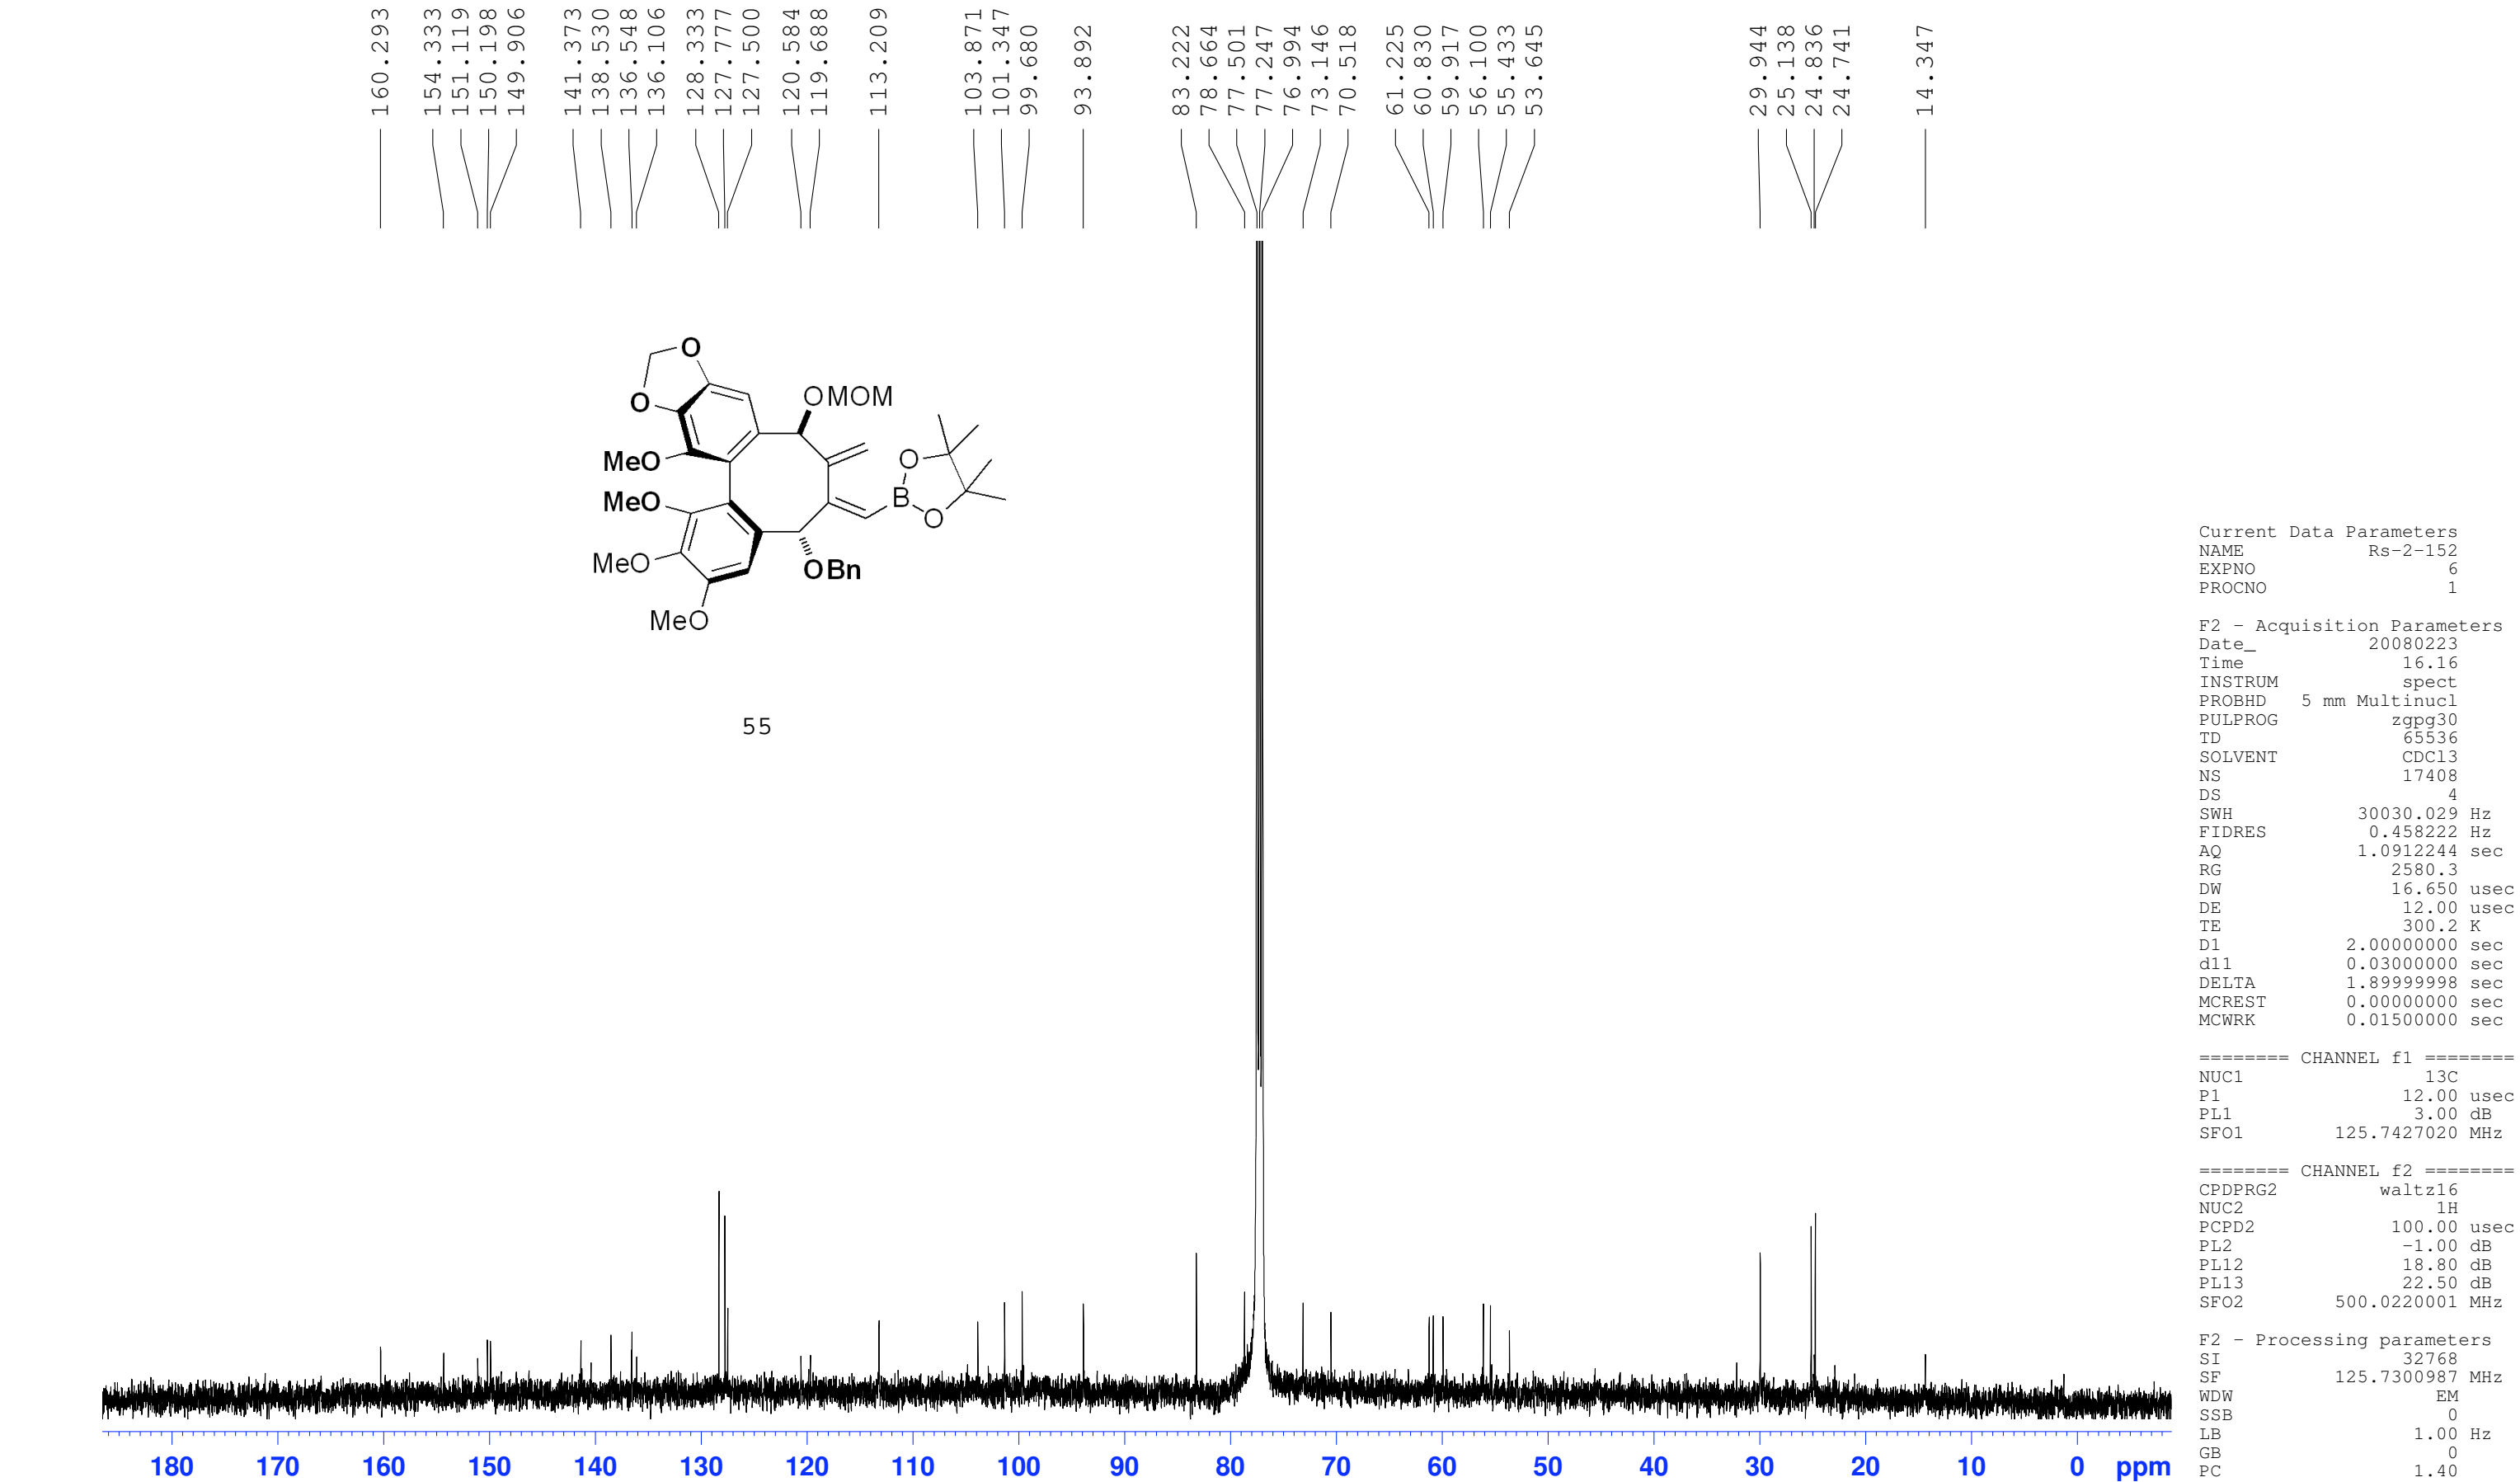

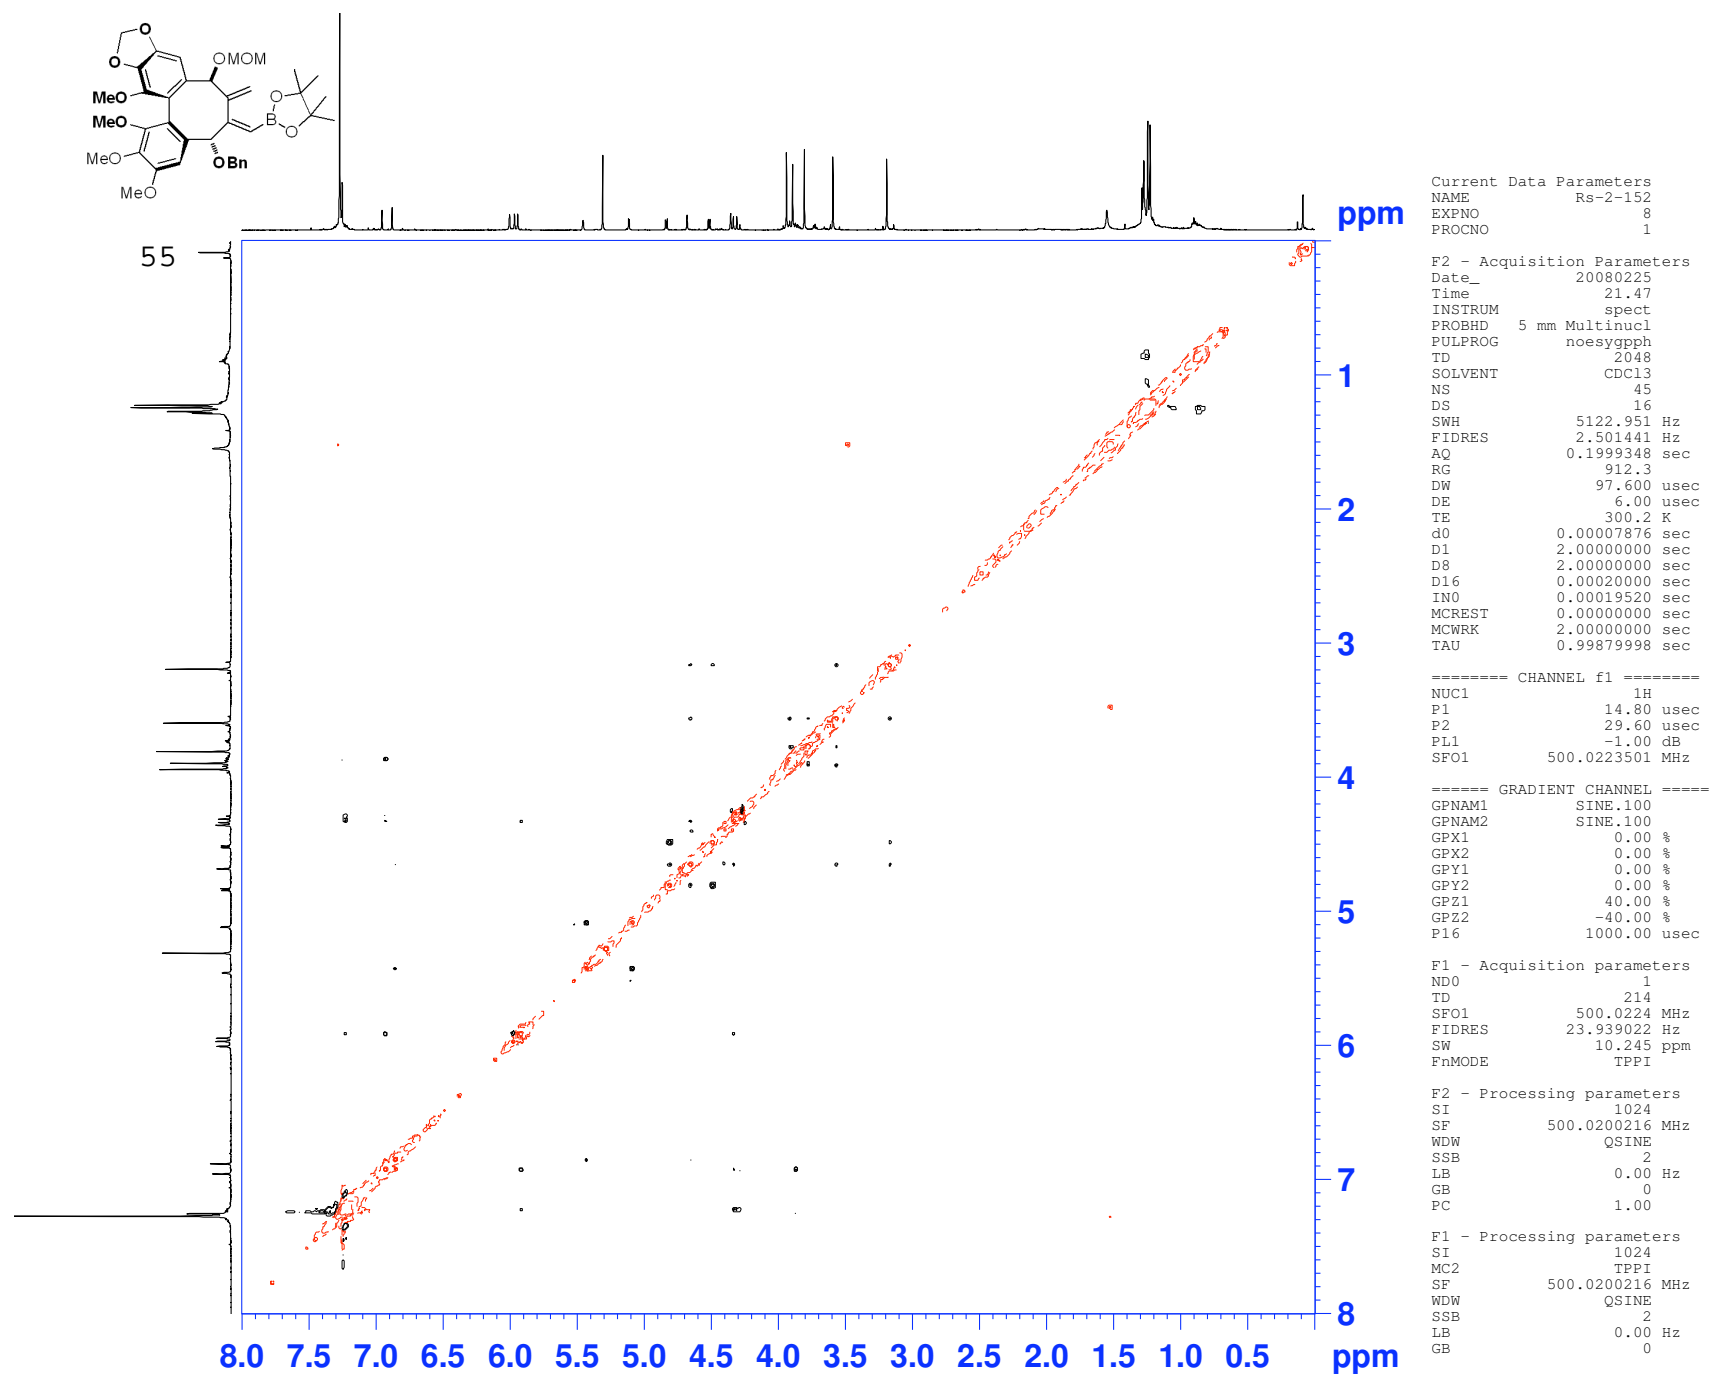

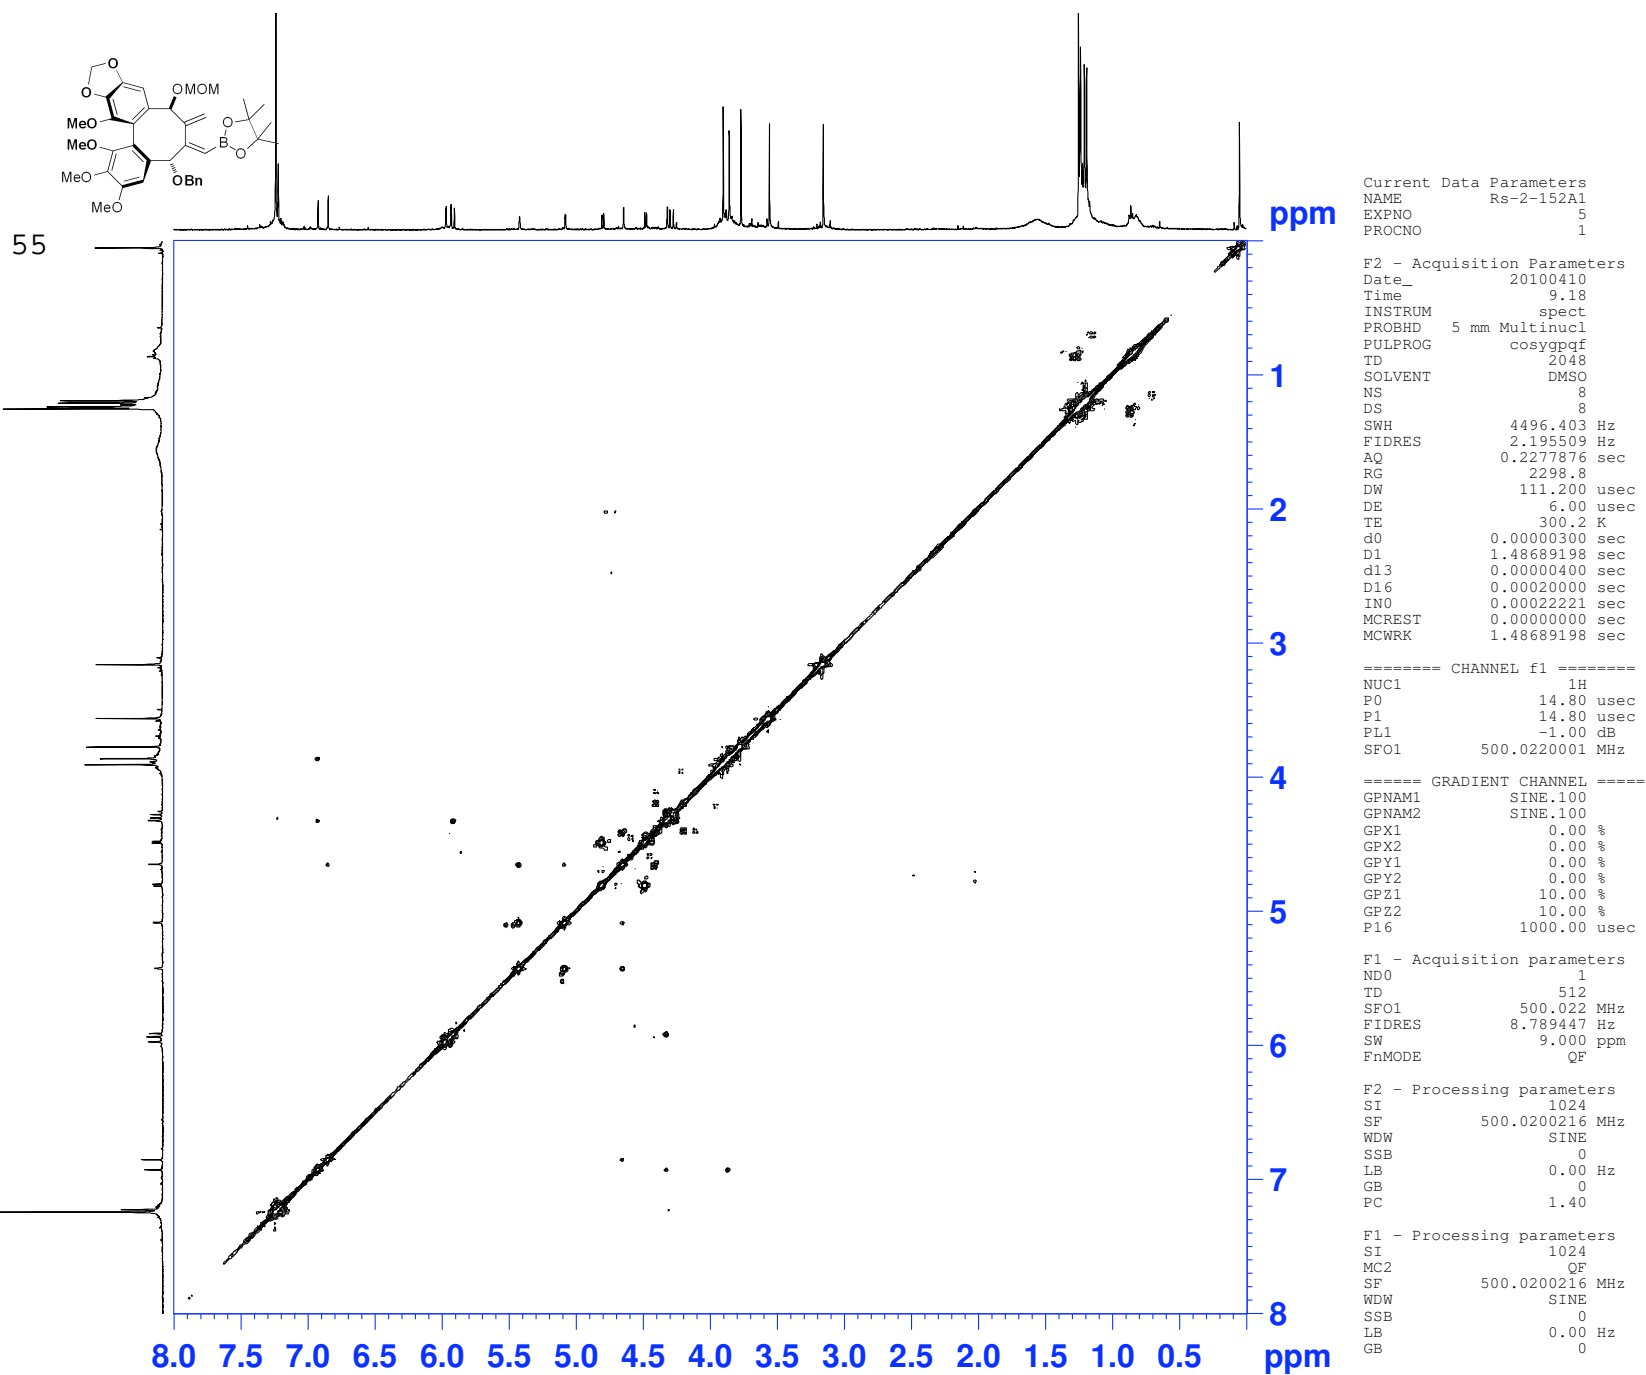

Supplement: c2sc00920j.pdf [file c2sc00920j.pdf]
